# Supplementary material for: Effect of Planarity of Aromatic Rings Appended to o-Carborane on Photophysical Properties: A Series of o-Carboranyl Compounds Based on 2-Phenylpyridine- and 2-(Benzo[b]thiophen-2-yl)pyridine
Source: Molecules. 2019 Jan 7;24(1):201. doi: 10.3390/molecules24010201 (PMC6337515; doi:10.3390/molecules24010201)
Supplement: Supplementary file 1 [file molecules-24-00201-s001.zip]

Archive with 5 entries (5 files):
- Supplementary files/CB2.cif
- Supplementary files/CB2B.cif
- Supplementary files/checkcif[CB2].pdf
- Supplementary files/checkcif[CB2B].pdf
- Supplementary files/SM-4CBBMe2-Mole.doc
