# Supplementary material for: Effect of Planarity of Aromatic Rings Appended to o-Carborane on Photophysical Properties: A Series of o-Carboranyl Compounds Based on 2-Phenylpyridine- and 2-(Benzo[b]thiophen-2-yl)pyridine
Source: Molecules. 2019 Jan 7;24(1):201. doi: 10.3390/molecules24010201 (PMC6337515; doi:10.3390/molecules24010201)
Supplement: Supplementary file 1 [file molecules-24-00201-s001.zip › Supplementary files/CB2.cif]

 
data_CB2
 
_audit_creation_method            SHELXL-2013
_chemical_name_systematic
;
 ?
;
_chemical_name_common             ?
_chemical_melting_point           ?
_chemical_formula_moiety          C19H27B10NS
_chemical_formula_sum
 'C19 H27 B10 N S' 
_chemical_formula_weight          409.57

loop_
 _atom_type_symbol
 _atom_type_description
 _atom_type_scat_dispersion_real
 _atom_type_scat_dispersion_imag
 _atom_type_scat_source
 'C'  'C'   0.0033   0.0016
 'International Tables Vol C Tables 4.2.6.8 and 6.1.1.4'
 'H'  'H'   0.0000   0.0000
 'International Tables Vol C Tables 4.2.6.8 and 6.1.1.4'
 'B'  'B'   0.0013   0.0007
 'International Tables Vol C Tables 4.2.6.8 and 6.1.1.4'
 'N'  'N'   0.0061   0.0033
 'International Tables Vol C Tables 4.2.6.8 and 6.1.1.4'
 'S'  'S'   0.1246   0.1234
 'International Tables Vol C Tables 4.2.6.8 and 6.1.1.4'
 
_space_group_crystal_system       monoclinic
_space_group_IT_number            14
_space_group_name_H-M_alt         'P 21/c'
_space_group_name_Hall            '-P 2ybc'
 
_shelx_space_group_comment
;
The symmetry employed for this shelxl refinement is uniquely defined
by the following loop, which should always be used as a source of
symmetry information in preference to the above space-group names.
They are only intended as comments.
;
 
loop_
 _space_group_symop_operation_xyz
 'x, y, z'
 '-x, y+1/2, -z+1/2'
 '-x, -y, -z'
 'x, -y-1/2, z-1/2'
 
_cell_length_a                    14.7656(6)
_cell_length_b                    11.0253(5)
_cell_length_c                    14.9976(6)
_cell_angle_alpha                 90
_cell_angle_beta                  107.893(2)
_cell_angle_gamma                 90
_cell_volume                      2323.44(17)
_cell_formula_units_Z             4
_cell_measurement_temperature     296(2)
_cell_measurement_reflns_used     61389 
_cell_measurement_theta_min       1.449 
_cell_measurement_theta_max       25.569
 
_exptl_crystal_description        cubic 
_exptl_crystal_colour             yellow
_exptl_crystal_density_meas       ? 
_exptl_crystal_density_method     ?              
_exptl_crystal_density_diffrn     1.171          
_exptl_crystal_F_000              856
_exptl_transmission_factor_min    ?                                             
_exptl_transmission_factor_max    ?                                             
_exptl_crystal_size_max           0.2
_exptl_crystal_size_mid           0.18
_exptl_crystal_size_min           0.15
_exptl_absorpt_coefficient_mu     0.147
_shelx_estimated_absorpt_T_min    ? 
_shelx_estimated_absorpt_T_max    ? 
_exptl_absorpt_correction_type    'multi-scan'   
_exptl_absorpt_correction_T_min   0.971
_exptl_absorpt_correction_T_max   0.978
_exptl_absorpt_process_details    'SADABS' 
 
_exptl_special_details
;
 ?
;
 
_diffrn_ambient_temperature       296(2)
_diffrn_radiation_wavelength      0.71073
_diffrn_radiation_type            MoK\a
_diffrn_source                    'fine-focus sealed tube'                       
_diffrn_measurement_device_type   'CCD area detector'
_diffrn_measurement_method        'phi and omega scans' 
_diffrn_detector_area_resol_mean  ? 
_diffrn_reflns_number             61389
_diffrn_reflns_av_unetI/netI      0.0290
_diffrn_reflns_av_R_equivalents   0.0700
_diffrn_reflns_limit_h_min        -17
_diffrn_reflns_limit_h_max        17
_diffrn_reflns_limit_k_min        -13
_diffrn_reflns_limit_k_max        13
_diffrn_reflns_limit_l_min        -18
_diffrn_reflns_limit_l_max        18
_diffrn_reflns_theta_min          1.449
_diffrn_reflns_theta_max          25.569
_diffrn_reflns_theta_full         25.242
_diffrn_measured_fraction_theta_max   0.994
_diffrn_measured_fraction_theta_full  1.000
_diffrn_reflns_Laue_measured_fraction_max    0.994
_diffrn_reflns_Laue_measured_fraction_full   1.000
_diffrn_reflns_point_group_measured_fraction_max   0.994
_diffrn_reflns_point_group_measured_fraction_full  1.000
_reflns_number_total              4340
_reflns_number_gt                 3503
_reflns_threshold_expression      'I > 2\s(I)'
_reflns_Friedel_coverage          0.000
_reflns_Friedel_fraction_max      .
_reflns_Friedel_fraction_full     .
 
_reflns_special_details
;
 Reflections were merged by SHELXL according to the crystal
 class for the calculation of statistics and refinement.
 
 _reflns_Friedel_fraction is defined as the number of unique
 Friedel pairs measured divided by the number that would be
 possible theoretically, ignoring centric projections and
 systematic absences.
;
 
_computing_data_collection        'Bruker D8 QUEST' 
_computing_cell_refinement        'Bruker D8 QUEST' 
_computing_data_reduction         'Bruker D8 QUEST' 
_computing_structure_solution     'SHELXL-2014 (Sheldrick, 2014)'
_computing_structure_refinement   'SHELXL-2014 (Sheldrick, 2014)'
_computing_molecular_graphics     'SHELXL-2014 (Sheldrick, 2014)'
_computing_publication_material   'Bruker SHELXTL'
 
_refine_special_details
;
 ?
;
_refine_ls_structure_factor_coef  Fsqd
_refine_ls_matrix_type            full
_refine_ls_weighting_scheme       calc
_refine_ls_weighting_details
'w=1/[\s^2^(Fo^2^)+(0.0860P)^2^+1.2195P] where P=(Fo^2^+2Fc^2^)/3'
_atom_sites_solution_primary      ?
_atom_sites_solution_secondary    ?
_atom_sites_solution_hydrogens    geom
_refine_ls_hydrogen_treatment     constr
_refine_ls_extinction_method      none
_refine_ls_extinction_coef        .
_refine_ls_number_reflns          4340
_refine_ls_number_parameters      281
_refine_ls_number_restraints      0
_refine_ls_R_factor_all           0.0807
_refine_ls_R_factor_gt            0.0640
_refine_ls_wR_factor_ref          0.1745
_refine_ls_wR_factor_gt           0.1606
_refine_ls_goodness_of_fit_ref    1.074
_refine_ls_restrained_S_all       1.074
_refine_ls_shift/su_max           0.001
_refine_ls_shift/su_mean          0.000
 
loop_
 _atom_site_label
 _atom_site_type_symbol
 _atom_site_fract_x
 _atom_site_fract_y
 _atom_site_fract_z
 _atom_site_U_iso_or_equiv
 _atom_site_adp_type
 _atom_site_occupancy
 _atom_site_site_symmetry_order  
 _atom_site_calc_flag
 _atom_site_refinement_flags_posn
 _atom_site_refinement_flags_adp
 _atom_site_refinement_flags_occupancy
 _atom_site_disorder_assembly
 _atom_site_disorder_group
C16 C 0.82917(16) 0.7797(2) 0.48993(15) 0.0372(5) Uani 1 1 d . . . . .
C17 C 0.82887(18) 0.8098(2) 0.60096(16) 0.0466(6) Uani 1 1 d . . . . .
C11 C 0.74308(17) 0.8150(2) 0.40913(15) 0.0395(5) Uani 1 1 d . . . . .
C12 C 0.6564(2) 0.7552(3) 0.3920(2) 0.0635(8) Uani 1 1 d . . . . .
H4 H 0.6491 0.6923 0.4305 0.076 Uiso 1 1 calc R U . . .
C13 C 0.5813(2) 0.7921(3) 0.3160(2) 0.0831(12) Uani 1 1 d . . . . .
H5 H 0.5231 0.7532 0.3061 0.100 Uiso 1 1 calc R U . . .
C9 C 0.67033(17) 0.9349(2) 0.27138(16) 0.0413(6) Uani 1 1 d . . . . .
C10 C 0.74944(16) 0.9066(2) 0.34782(15) 0.0362(5) Uani 1 1 d . . . . .
H31 H 0.8061 0.9490 0.3576 0.043 Uiso 1 1 calc R U . . .
C1 C 0.67237(17) 1.0263(2) 0.20037(16) 0.0403(6) Uani 1 1 d . . . . .
C2 C 0.74760(19) 1.0905(2) 0.18784(17) 0.0437(6) Uani 1 1 d . . . . .
H9 H 0.8096 1.0863 0.2280 0.052 Uiso 1 1 calc R U . . .
C3 C 0.71837(19) 1.1653(2) 0.10464(17) 0.0467(6) Uani 1 1 d . . . . .
C8 C 0.6200(2) 1.1564(2) 0.05845(17) 0.0490(6) Uani 1 1 d . . . . .
C7 C 0.5765(2) 1.2235(3) -0.0233(2) 0.0685(9) Uani 1 1 d . . . . .
H12 H 0.5113 1.2188 -0.0529 0.082 Uiso 1 1 calc R U . . .
C6 C 0.6334(3) 1.2961(3) -0.0581(2) 0.0780(10) Uani 1 1 d . . . . .
H13 H 0.6059 1.3417 -0.1118 0.094 Uiso 1 1 calc R U . . .
C5 C 0.7305(3) 1.3028(3) -0.0152(2) 0.0784(11) Uani 1 1 d . . . . .
H14 H 0.7671 1.3514 -0.0415 0.094 Uiso 1 1 calc R U . . .
C4 C 0.7745(2) 1.2390(3) 0.0660(2) 0.0670(8) Uani 1 1 d . . . . .
H15 H 0.8399 1.2447 0.0945 0.080 Uiso 1 1 calc R U . . .
C18 C 0.7385(2) 0.8671(4) 0.6117(2) 0.0735(9) Uani 1 1 d . . . . .
H16A H 0.7090 0.9155 0.5564 0.088 Uiso 1 1 calc R U . . .
H16B H 0.6945 0.8027 0.6136 0.088 Uiso 1 1 calc R U . . .
C19 C 0.7519(3) 0.9445(4) 0.6951(2) 0.0805(10) Uani 1 1 d . . . . .
H17A H 0.7953 1.0099 0.6936 0.097 Uiso 1 1 calc R U . . .
H17B H 0.7806 0.8968 0.7510 0.097 Uiso 1 1 calc R U . . .
C20 C 0.6575(3) 0.9989(4) 0.7006(3) 0.0948(13) Uani 1 1 d . . . . .
H18A H 0.6275 1.0447 0.6441 0.114 Uiso 1 1 calc R U . . .
H18B H 0.6147 0.9338 0.7047 0.114 Uiso 1 1 calc R U . . .
C21 C 0.6741(3) 1.0800(5) 0.7839(3) 0.1163(16) Uani 1 1 d . . . . .
H19A H 0.7054 1.0352 0.8398 0.174 Uiso 1 1 calc R U . . .
H19B H 0.6142 1.1100 0.7874 0.174 Uiso 1 1 calc R U . . .
H19C H 0.7135 1.1470 0.7781 0.174 Uiso 1 1 calc R U . . .
N N 0.58608(16) 0.8790(2) 0.25607(17) 0.0659(7) Uani 1 1 d . . . . .
S S 0.56501(5) 1.05446(7) 0.11299(5) 0.0548(2) Uani 1 1 d . . . . .
B1 B 0.8190(2) 0.6600(3) 0.5611(2) 0.0505(8) Uani 1 1 d . . . . .
H1 H 0.7544 0.6046 0.5493 0.061 Uiso 1 1 calc R U . . .
B2 B 0.8913(2) 0.6994(3) 0.6748(2) 0.0571(8) Uani 1 1 d . . . . .
H2 H 0.8741 0.6689 0.7375 0.069 Uiso 1 1 calc R U . . .
B3 B 0.9415(2) 0.8448(3) 0.6698(2) 0.0525(8) Uani 1 1 d . . . . .
H3 H 0.9573 0.9082 0.7293 0.063 Uiso 1 1 calc R U . . .
B4 B 0.8990(2) 0.8961(3) 0.5521(2) 0.0431(6) Uani 1 1 d . . . . .
H4A H 0.8859 0.9927 0.5344 0.052 Uiso 1 1 calc R U . . .
B5 B 0.8912(2) 0.6493(3) 0.4867(2) 0.0502(7) Uani 1 1 d . . . . .
H5A H 0.8741 0.5867 0.4268 0.060 Uiso 1 1 calc R U . . .
B6 B 0.9333(3) 0.5978(3) 0.6049(2) 0.0587(9) Uani 1 1 d . . . . .
H6A H 0.9443 0.5009 0.6223 0.070 Uiso 1 1 calc R U . . .
B7 B 1.0100(2) 0.7121(3) 0.6719(2) 0.0531(8) Uani 1 1 d . . . . .
H7 H 1.0712 0.6893 0.7329 0.064 Uiso 1 1 calc R U . . .
B8 B 1.0144(2) 0.8339(3) 0.5955(2) 0.0484(7) Uani 1 1 d . . . . .
H8 H 1.0783 0.8904 0.6065 0.058 Uiso 1 1 calc R U . . .
B9 B 0.9415(2) 0.7947(3) 0.48154(19) 0.0438(7) Uani 1 1 d . . . . .
H9A H 0.9572 0.8259 0.4182 0.053 Uiso 1 1 calc R U . . .
B10 B 1.0104(2) 0.6807(3) 0.5559(2) 0.0538(8) Uani 1 1 d . . . . .
H10 H 1.0717 0.6375 0.5416 0.065 Uiso 1 1 calc R U . . .
 
loop_
 _atom_site_aniso_label
 _atom_site_aniso_U_11
 _atom_site_aniso_U_22
 _atom_site_aniso_U_33
 _atom_site_aniso_U_23
 _atom_site_aniso_U_13
 _atom_site_aniso_U_12
C16 0.0413(13) 0.0394(12) 0.0278(11) 0.0015(9) 0.0060(9) -0.0037(10)
C17 0.0491(15) 0.0607(16) 0.0272(12) 0.0009(11) 0.0076(10) 0.0002(12)
C11 0.0395(13) 0.0440(13) 0.0304(11) 0.0021(10) 0.0042(10) -0.0027(10)
C12 0.0507(16) 0.077(2) 0.0511(16) 0.0259(15) -0.0018(13) -0.0185(15)
C13 0.0482(17) 0.109(3) 0.073(2) 0.042(2) -0.0085(15) -0.0289(18)
C9 0.0398(13) 0.0458(14) 0.0340(12) 0.0025(10) 0.0048(10) 0.0003(11)
C10 0.0365(12) 0.0386(12) 0.0309(12) -0.0017(9) 0.0065(9) -0.0016(10)
C1 0.0437(13) 0.0425(13) 0.0303(12) 0.0005(10) 0.0050(10) 0.0038(11)
C2 0.0524(15) 0.0427(13) 0.0325(12) 0.0026(10) 0.0077(11) 0.0010(11)
C3 0.0591(16) 0.0407(13) 0.0343(13) -0.0016(10) 0.0057(11) -0.0062(12)
C8 0.0582(16) 0.0444(14) 0.0380(13) 0.0052(11) 0.0052(12) -0.0011(12)
C7 0.076(2) 0.0633(19) 0.0497(17) 0.0184(14) -0.0044(15) -0.0040(16)
C6 0.109(3) 0.0613(19) 0.0464(17) 0.0191(15) -0.0010(18) -0.0172(19)
C5 0.107(3) 0.069(2) 0.0525(18) 0.0095(16) 0.0143(18) -0.036(2)
C4 0.074(2) 0.0686(19) 0.0492(17) 0.0055(14) 0.0059(15) -0.0235(16)
C18 0.0608(19) 0.109(3) 0.0514(18) -0.0063(18) 0.0182(15) 0.0106(18)
C19 0.080(2) 0.099(3) 0.062(2) -0.0075(19) 0.0219(18) 0.021(2)
C20 0.094(3) 0.123(3) 0.075(2) -0.003(2) 0.036(2) 0.033(3)
C21 0.102(3) 0.142(4) 0.106(3) -0.017(3) 0.035(3) 0.040(3)
N 0.0437(13) 0.0876(18) 0.0539(14) 0.0288(13) -0.0035(11) -0.0114(12)
S 0.0448(4) 0.0649(5) 0.0458(4) 0.0184(3) 0.0007(3) 0.0020(3)
B1 0.0569(18) 0.0489(17) 0.0359(15) 0.0119(13) -0.0002(13) -0.0117(14)
B2 0.0584(19) 0.073(2) 0.0309(15) 0.0134(14) 0.0006(13) -0.0034(16)
B3 0.0543(18) 0.0604(19) 0.0329(15) -0.0063(13) -0.0011(13) 0.0001(15)
B4 0.0438(15) 0.0385(14) 0.0394(15) -0.0012(12) 0.0015(12) -0.0044(12)
B5 0.062(2) 0.0401(16) 0.0385(15) -0.0007(12) 0.0004(14) 0.0064(14)
B6 0.069(2) 0.0448(17) 0.0463(18) 0.0108(14) -0.0056(15) -0.0005(15)
B7 0.0543(18) 0.0550(18) 0.0377(16) 0.0064(13) -0.0039(13) -0.0002(15)
B8 0.0406(16) 0.0513(17) 0.0444(16) 0.0043(13) 0.0002(13) -0.0031(13)
B9 0.0402(15) 0.0535(17) 0.0351(14) 0.0051(12) 0.0077(12) 0.0024(13)
B10 0.0534(18) 0.0558(18) 0.0448(17) 0.0034(14) 0.0041(14) 0.0118(15)
 
_geom_special_details
;
 All esds (except the esd in the dihedral angle between two l.s. planes)
 are estimated using the full covariance matrix.  The cell esds are taken
 into account individually in the estimation of esds in distances, angles
 and torsion angles; correlations between esds in cell parameters are only
 used when they are defined by crystal symmetry.  An approximate (isotropic)
 treatment of cell esds is used for estimating esds involving l.s. planes.
;
 
loop_
 _geom_bond_atom_site_label_1
 _geom_bond_atom_site_label_2
 _geom_bond_distance
 _geom_bond_site_symmetry_2
 _geom_bond_publ_flag
C16 C11 1.513(3) . ?
C16 C17 1.699(3) . ?
C16 B9 1.710(4) . ?
C16 B5 1.713(4) . ?
C16 B4 1.729(3) . ?
C16 B1 1.733(4) . ?
C17 C18 1.529(4) . ?
C17 B3 1.711(4) . ?
C17 B2 1.711(4) . ?
C17 B4 1.727(4) . ?
C17 B1 1.747(4) . ?
C11 C10 1.389(3) . ?
C11 C12 1.391(4) . ?
C12 C13 1.385(4) . ?
C13 N 1.330(4) . ?
C9 N 1.343(3) . ?
C9 C10 1.398(3) . ?
C9 C1 1.473(3) . ?
C1 C2 1.378(3) . ?
C1 S 1.746(2) . ?
C2 C3 1.446(3) . ?
C3 C8 1.407(4) . ?
C3 C4 1.407(4) . ?
C8 C7 1.407(4) . ?
C8 S 1.733(3) . ?
C7 C6 1.374(5) . ?
C6 C5 1.381(5) . ?
C5 C4 1.384(4) . ?
C18 C19 1.476(4) . ?
C19 C20 1.542(5) . ?
C20 C21 1.494(6) . ?
B1 B6 1.751(5) . ?
B1 B2 1.765(4) . ?
B1 B5 1.768(5) . ?
B2 B6 1.771(5) . ?
B2 B7 1.772(5) . ?
B2 B3 1.777(5) . ?
B3 B7 1.774(5) . ?
B3 B4 1.775(4) . ?
B3 B8 1.777(5) . ?
B4 B8 1.766(4) . ?
B4 B9 1.781(4) . ?
B5 B9 1.779(4) . ?
B5 B10 1.781(4) . ?
B5 B6 1.781(4) . ?
B6 B7 1.783(5) . ?
B6 B10 1.785(5) . ?
B7 B10 1.776(4) . ?
B7 B8 1.780(4) . ?
B8 B9 1.770(4) . ?
B8 B10 1.785(5) . ?
B9 B10 1.778(4) . ?
 
loop_
 _geom_angle_atom_site_label_1
 _geom_angle_atom_site_label_2
 _geom_angle_atom_site_label_3
 _geom_angle
 _geom_angle_site_symmetry_1
 _geom_angle_site_symmetry_3
 _geom_angle_publ_flag
C11 C16 C17 118.71(19) . . ?
C11 C16 B9 120.76(19) . . ?
C17 C16 B9 110.36(18) . . ?
C11 C16 B5 121.21(19) . . ?
C17 C16 B5 110.71(18) . . ?
B9 C16 B5 62.61(17) . . ?
C11 C16 B4 117.14(19) . . ?
C17 C16 B4 60.48(15) . . ?
B9 C16 B4 62.38(16) . . ?
B5 C16 B4 113.74(19) . . ?
C11 C16 B1 118.6(2) . . ?
C17 C16 B1 61.19(16) . . ?
B9 C16 B1 112.9(2) . . ?
B5 C16 B1 61.73(18) . . ?
B4 C16 B1 112.54(18) . . ?
C18 C17 C16 116.7(2) . . ?
C18 C17 B3 124.1(2) . . ?
C16 C17 B3 109.95(19) . . ?
C18 C17 B2 122.7(2) . . ?
C16 C17 B2 109.4(2) . . ?
B3 C17 B2 62.57(18) . . ?
C18 C17 B4 118.2(2) . . ?
C16 C17 B4 60.61(14) . . ?
B3 C17 B4 62.19(16) . . ?
B2 C17 B4 113.1(2) . . ?
C18 C17 B1 116.3(2) . . ?
C16 C17 B1 60.36(15) . . ?
B3 C17 B1 112.5(2) . . ?
B2 C17 B1 61.38(17) . . ?
B4 C17 B1 111.95(19) . . ?
C10 C11 C12 117.8(2) . . ?
C10 C11 C16 120.4(2) . . ?
C12 C11 C16 121.7(2) . . ?
C13 C12 C11 118.2(3) . . ?
N C13 C12 124.8(3) . . ?
N C9 C10 122.3(2) . . ?
N C9 C1 114.4(2) . . ?
C10 C9 C1 123.3(2) . . ?
C11 C10 C9 119.8(2) . . ?
C2 C1 C9 130.3(2) . . ?
C2 C1 S 112.97(18) . . ?
C9 C1 S 116.66(18) . . ?
C1 C2 C3 111.8(2) . . ?
C8 C3 C4 119.1(2) . . ?
C8 C3 C2 112.0(2) . . ?
C4 C3 C2 128.8(3) . . ?
C7 C8 C3 121.2(3) . . ?
C7 C8 S 126.7(2) . . ?
C3 C8 S 112.02(18) . . ?
C6 C7 C8 117.9(3) . . ?
C7 C6 C5 121.5(3) . . ?
C6 C5 C4 121.5(3) . . ?
C5 C4 C3 118.6(3) . . ?
C19 C18 C17 115.8(3) . . ?
C18 C19 C20 112.5(3) . . ?
C21 C20 C19 111.0(4) . . ?
C13 N C9 117.0(2) . . ?
C8 S C1 91.17(12) . . ?
C16 B1 C17 58.45(14) . . ?
C16 B1 B6 105.9(2) . . ?
C17 B1 B6 105.8(2) . . ?
C16 B1 B2 105.4(2) . . ?
C17 B1 B2 58.30(17) . . ?
B6 B1 B2 60.50(19) . . ?
C16 B1 B5 58.58(16) . . ?
C17 B1 B5 106.0(2) . . ?
B6 B1 B5 60.81(19) . . ?
B2 B1 B5 108.8(2) . . ?
C17 B2 B1 60.32(16) . . ?
C17 B2 B6 106.5(2) . . ?
B1 B2 B6 59.36(19) . . ?
C17 B2 B7 105.6(2) . . ?
B1 B2 B7 107.7(2) . . ?
B6 B2 B7 60.43(19) . . ?
C17 B2 B3 58.70(17) . . ?
B1 B2 B3 108.6(2) . . ?
B6 B2 B3 108.6(2) . . ?
B7 B2 B3 59.97(18) . . ?
C17 B3 B7 105.5(2) . . ?
C17 B3 B4 59.35(15) . . ?
B7 B3 B4 107.8(2) . . ?
C17 B3 B8 105.66(19) . . ?
B7 B3 B8 60.17(18) . . ?
B4 B3 B8 59.62(16) . . ?
C17 B3 B2 58.73(17) . . ?
B7 B3 B2 59.88(19) . . ?
B4 B3 B2 107.7(2) . . ?
B8 B3 B2 107.8(2) . . ?
C17 B4 C16 58.91(14) . . ?
C17 B4 B8 105.4(2) . . ?
C16 B4 B8 105.0(2) . . ?
C17 B4 B3 58.46(16) . . ?
C16 B4 B3 105.6(2) . . ?
B8 B4 B3 60.23(17) . . ?
C17 B4 B9 105.84(19) . . ?
C16 B4 B9 58.29(15) . . ?
B8 B4 B9 59.88(16) . . ?
B3 B4 B9 108.0(2) . . ?
C16 B5 B1 59.68(16) . . ?
C16 B5 B9 58.61(15) . . ?
B1 B5 B9 108.0(2) . . ?
C16 B5 B10 105.2(2) . . ?
B1 B5 B10 107.4(2) . . ?
B9 B5 B10 59.95(17) . . ?
C16 B5 B6 105.4(2) . . ?
B1 B5 B6 59.13(18) . . ?
B9 B5 B6 108.0(2) . . ?
B10 B5 B6 60.14(18) . . ?
B1 B6 B2 60.14(19) . . ?
B1 B6 B5 60.06(18) . . ?
B2 B6 B5 108.0(2) . . ?
B1 B6 B7 107.9(2) . . ?
B2 B6 B7 59.80(19) . . ?
B5 B6 B7 107.6(2) . . ?
B1 B6 B10 108.0(2) . . ?
B2 B6 B10 107.7(2) . . ?
B5 B6 B10 59.92(18) . . ?
B7 B6 B10 59.69(18) . . ?
B2 B7 B3 60.15(19) . . ?
B2 B7 B10 108.0(2) . . ?
B3 B7 B10 108.5(2) . . ?
B2 B7 B8 107.9(2) . . ?
B3 B7 B8 60.00(18) . . ?
B10 B7 B8 60.27(18) . . ?
B2 B7 B6 59.8(2) . . ?
B3 B7 B6 108.2(2) . . ?
B10 B7 B6 60.20(19) . . ?
B8 B7 B6 108.2(2) . . ?
B4 B8 B9 60.48(16) . . ?
B4 B8 B3 60.15(17) . . ?
B9 B8 B3 108.4(2) . . ?
B4 B8 B7 107.9(2) . . ?
B9 B8 B7 107.8(2) . . ?
B3 B8 B7 59.82(18) . . ?
B4 B8 B10 108.4(2) . . ?
B9 B8 B10 60.03(17) . . ?
B3 B8 B10 107.9(2) . . ?
B7 B8 B10 59.75(18) . . ?
C16 B9 B8 105.58(19) . . ?
C16 B9 B10 105.4(2) . . ?
B8 B9 B10 60.39(17) . . ?
C16 B9 B5 58.78(16) . . ?
B8 B9 B5 108.4(2) . . ?
B10 B9 B5 60.08(17) . . ?
C16 B9 B4 59.33(15) . . ?
B8 B9 B4 59.63(16) . . ?
B10 B9 B4 108.0(2) . . ?
B5 B9 B4 108.1(2) . . ?
B7 B10 B9 107.6(2) . . ?
B7 B10 B5 108.0(2) . . ?
B9 B10 B5 59.96(17) . . ?
B7 B10 B6 60.11(19) . . ?
B9 B10 B6 107.8(2) . . ?
B5 B10 B6 59.94(18) . . ?
B7 B10 B8 59.98(17) . . ?
B9 B10 B8 59.58(17) . . ?
B5 B10 B8 107.7(2) . . ?
B6 B10 B8 107.9(2) . . ?
 
_refine_diff_density_max    0.371
_refine_diff_density_min   -0.224
_refine_diff_density_rms    0.051

_shelxl_version_number 2013-4

_shelx_res_file
;
TITL bhj41-1 in P2(1)/c
CELL 0.71073  14.7656  11.0253  14.9976  90.000 107.893  90.000
ZERR   4.00   0.0006   0.0005   0.0006   0.000   0.002   0.000
LATT 1
SYMM -X, 0.5+Y, 0.5-Z
SFAC C  H  B  N  S
UNIT 76  108  40  4  4
L.S. 6
ACTA
BOND
FMAP 2
PLAN 1
TEMP 23.000
WGHT    0.086000    1.219500
FVAR       0.54111
MOLE 1
C16   1    0.829169    0.779686    0.489935    11.00000    0.04131    0.03937 =
         0.02778    0.00150    0.00596   -0.00365
C17   1    0.828871    0.809757    0.600963    11.00000    0.04912    0.06072 =
         0.02715    0.00089    0.00759    0.00017
C11   1    0.743084    0.814950    0.409133    11.00000    0.03954    0.04400 =
         0.03041    0.00214    0.00424   -0.00269
C12   1    0.656400    0.755244    0.391954    11.00000    0.05065    0.07693 =
         0.05109    0.02588   -0.00180   -0.01845
AFIX  43
H4    2    0.649112    0.692295    0.430456    11.00000   -1.20000
AFIX   0
C13   1    0.581258    0.792081    0.315968    11.00000    0.04816    0.10921 =
         0.07340    0.04220   -0.00853   -0.02892
AFIX  43
H5    2    0.523116    0.753161    0.306073    11.00000   -1.20000
AFIX   0
C9    1    0.670329    0.934930    0.271383    11.00000    0.03982    0.04579 =
         0.03397    0.00247    0.00481    0.00031
C10   1    0.749435    0.906607    0.347817    11.00000    0.03650    0.03860 =
         0.03094   -0.00175    0.00649   -0.00157
AFIX  43
H31   2    0.806119    0.948981    0.357583    11.00000   -1.20000
AFIX   0
C1    1    0.672365    1.026303    0.200367    11.00000    0.04373    0.04249 =
         0.03026    0.00054    0.00504    0.00382
C2    1    0.747596    1.090507    0.187841    11.00000    0.05244    0.04266 =
         0.03249    0.00262    0.00774    0.00098
AFIX  43
H9    2    0.809626    1.086287    0.228007    11.00000   -1.20000
AFIX   0
C3    1    0.718374    1.165255    0.104639    11.00000    0.05914    0.04070 =
         0.03432   -0.00161    0.00570   -0.00622
C8    1    0.620021    1.156447    0.058446    11.00000    0.05825    0.04439 =
         0.03798    0.00516    0.00522   -0.00109
C7    1    0.576512    1.223494   -0.023326    11.00000    0.07646    0.06332 =
         0.04968    0.01840   -0.00444   -0.00396
AFIX  43
H12   2    0.511269    1.218832   -0.052914    11.00000   -1.20000
AFIX   0
C6    1    0.633403    1.296075   -0.058117    11.00000    0.10933    0.06134 =
         0.04643    0.01914   -0.00101   -0.01721
AFIX  43
H13   2    0.605919    1.341697   -0.111789    11.00000   -1.20000
AFIX   0
C5    1    0.730460    1.302827   -0.015208    11.00000    0.10700    0.06895 =
         0.05245    0.00953    0.01434   -0.03618
AFIX  43
H14   2    0.767055    1.351395   -0.041487    11.00000   -1.20000
AFIX   0
C4    1    0.774539    1.238970    0.066019    11.00000    0.07438    0.06864 =
         0.04915    0.00550    0.00593   -0.02348
AFIX  43
H15   2    0.839921    1.244682    0.094466    11.00000   -1.20000
AFIX   0
C18   1    0.738547    0.867137    0.611726    11.00000    0.06081    0.10893 =
         0.05136   -0.00629    0.01817    0.01063
AFIX  23
H16A  2    0.709033    0.915536    0.556402    11.00000   -1.20000
H16B  2    0.694492    0.802654    0.613642    11.00000   -1.20000
AFIX   0
C19   1    0.751867    0.944516    0.695097    11.00000    0.08029    0.09875 =
         0.06242   -0.00748    0.02186    0.02072
AFIX  23
H17A  2    0.795314    1.009925    0.693611    11.00000   -1.20000
H17B  2    0.780614    0.896770    0.750970    11.00000   -1.20000
AFIX   0
C20   1    0.657498    0.998873    0.700631    11.00000    0.09351    0.12302 =
         0.07487   -0.00282    0.03613    0.03327
AFIX  23
H18A  2    0.627507    1.044750    0.644061    11.00000   -1.20000
H18B  2    0.614716    0.933826    0.704715    11.00000   -1.20000
AFIX   0
C21   1    0.674133    1.080002    0.783933    11.00000    0.10212    0.14235 =
         0.10641   -0.01678    0.03507    0.04038
AFIX 137
H19A  2    0.705351    1.035189    0.839814    11.00000   -1.50000
H19B  2    0.614250    1.109961    0.787369    11.00000   -1.50000
H19C  2    0.713488    1.146981    0.778135    11.00000   -1.50000
AFIX   0
N     4    0.586075    0.879019    0.256073    11.00000    0.04366    0.08764 =
         0.05394    0.02884   -0.00349   -0.01143
S     5    0.565007    1.054458    0.112988    11.00000    0.04483    0.06487 =
         0.04582    0.01835    0.00072    0.00200
B1    3    0.819023    0.659966    0.561123    11.00000    0.05691    0.04891 =
         0.03594    0.01191   -0.00017   -0.01168
AFIX 153
H1    2    0.754394    0.604649    0.549282    11.00000   -1.20000
AFIX   0
B2    3    0.891280    0.699435    0.674785    11.00000    0.05842    0.07317 =
         0.03086    0.01344    0.00062   -0.00344
AFIX 153
H2    2    0.874060    0.668900    0.737512    11.00000   -1.20000
AFIX   0
B3    3    0.941489    0.844782    0.669846    11.00000    0.05427    0.06042 =
         0.03288   -0.00631   -0.00108    0.00009
AFIX 153
H3    2    0.957260    0.908232    0.729256    11.00000   -1.20000
AFIX   0
B4    3    0.898988    0.896114    0.552099    11.00000    0.04378    0.03852 =
         0.03941   -0.00117    0.00146   -0.00439
AFIX 153
H4A   2    0.885942    0.992703    0.534431    11.00000   -1.20000
AFIX   0
B5    3    0.891232    0.649324    0.486742    11.00000    0.06184    0.04009 =
         0.03849   -0.00070    0.00045    0.00642
AFIX 153
H5A   2    0.874100    0.586722    0.426751    11.00000   -1.20000
AFIX   0
B6    3    0.933293    0.597821    0.604903    11.00000    0.06918    0.04485 =
         0.04626    0.01080   -0.00563   -0.00046
AFIX 153
H6A   2    0.944291    0.500919    0.622326    11.00000   -1.20000
AFIX   0
B7    3    1.009991    0.712076    0.671913    11.00000    0.05426    0.05503 =
         0.03766    0.00642   -0.00387   -0.00023
AFIX 153
H7    2    1.071225    0.689255    0.732940    11.00000   -1.20000
AFIX   0
B8    3    1.014429    0.833861    0.595472    11.00000    0.04063    0.05133 =
         0.04443    0.00428    0.00023   -0.00310
AFIX 153
H8    2    1.078298    0.890435    0.606484    11.00000   -1.20000
AFIX   0
B9    3    0.941528    0.794731    0.481544    11.00000    0.04017    0.05355 =
         0.03514    0.00514    0.00769    0.00236
AFIX 153
H9A   2    0.957184    0.825939    0.418177    11.00000   -1.20000
AFIX   0
B10   3    1.010415    0.680687    0.555917    11.00000    0.05340    0.05578 =
         0.04480    0.00341    0.00410    0.01179
AFIX 153
H10   2    1.071671    0.637486    0.541625    11.00000   -1.20000
AFIX   0
HKLF 4

REM  bhj41-1 in P2(1)/c
REM R1 =  0.0640 for    3503 Fo > 4sig(Fo)  and  0.0807 for all    4340 data
REM    281 parameters refined using      0 restraints

END

WGHT      0.0828      1.2586

REM Highest difference peak  0.371,  deepest hole -0.224,  1-sigma level  0.051
Q1    1   0.6937  0.8537  0.6780  11.00000  0.05    0.37
;
_shelx_res_checksum   52685

_shelx_hkl_file
;
   1   0   0   -2.99    0.23
  -2   0   0 2338.96  102.79
  -2   0   0 2494.42  102.86
   2   0   0 2161.77  102.69
  -2   0   0 2430.57  100.64
   3   0   0 3614.84  167.16
  -3   0   0 3760.28  161.96
   3   0   0 3681.41  167.21
  -3   0   0 3760.50  158.72
  -3   0   0 3919.38  162.26
   3   0   0 3573.62  161.95
   4   0   0    2.74    0.79
   4   0   0    4.12    0.77
  -4   0   0    3.18    1.46
  -4   0   0    3.47    1.47
  -4   0   0    1.87    1.35
  -4   0   0    3.25    0.96
  -5   0   0  397.46   19.25
  -5   0   0  379.66   19.04
   5   0   0  353.39   17.86
  -5   0   0  410.65   19.68
  -5   0   0  381.63   17.70
   5   0   0  367.61   17.66
   6   0   0 1351.92   64.33
  -6   0   0 1402.83   63.48
  -6   0   0 1381.34   63.46
  -6   0   0 1446.05   62.16
   6   0   0 1413.51   64.06
  -6   0   0 1434.69   62.82
  -6   0   0 1424.78   62.84
  -6   0   0 1457.47   65.04
  -6   0   0 1440.10   64.80
  -7   0   0  427.60   20.06
  -7   0   0  423.10   22.03
  -7   0   0  446.67   22.48
  -7   0   0  418.48   21.92
   7   0   0  414.26   20.17
  -7   0   0  420.91   22.61
  -7   0   0  429.24   21.61
  -7   0   0  427.64   22.20
   7   0   0  405.07   20.53
  -8   0   0   51.82    6.23
  -8   0   0   50.72    4.14
   8   0   0   51.25    3.91
  -8   0   0   52.52    6.75
  -8   0   0   63.74    7.05
   8   0   0   52.36    4.61
  -8   0   0   47.47    6.23
  -8   0   0   50.34    6.17
  -8   0   0   62.79    7.03
  -9   0   0  125.72    9.91
   9   0   0  130.07    8.38
  -9   0   0  132.46   10.59
  -9   0   0  136.56    7.90
   9   0   0  132.87    7.77
  -9   0   0  121.36   10.04
  -9   0   0  116.21    9.95
  -9   0   0  126.55   10.20
 -10   0   0  216.70   15.20
  10   0   0  246.07   12.32
 -10   0   0  246.72   15.54
  10   0   0  213.95   14.91
 -10   0   0  209.84   15.42
 -10   0   0  195.10   14.59
 -10   0   0  194.17   14.19
 -11   0   0   72.62    8.69
  11   0   0   95.49    6.37
 -11   0   0   67.89    9.25
 -11   0   0   59.90    8.88
 -11   0   0   68.09    8.75
  11   0   0   49.87    8.05
 -11   0   0   48.66    8.36
 -12   0   0  642.48   34.52
 -12   0   0  633.48   33.55
 -12   0   0  614.80   34.52
 -12   0   0  623.59   35.34
  12   0   0  659.42   31.38
  12   0   0  593.69   34.03
 -12   0   0  644.43   35.10
 -13   0   0  137.26   14.41
 -13   0   0  171.12   14.43
 -13   0   0  155.08   14.63
  13   0   0  155.27   10.19
  13   0   0  161.45   14.48
 -13   0   0  133.07   14.15
 -13   0   0  161.06   14.58
 -14   0   0    5.65    5.07
 -14   0   0    1.79    4.75
 -14   0   0    1.24    4.73
  14   0   0    2.93    5.22
 -14   0   0    7.04    5.02
  14   0   0   15.26    3.91
 -14   0   0    6.49    4.76
 -15   0   0    8.40    6.06
  15   0   0    5.69    5.49
 -15   0   0   -1.82    4.83
 -15   0   0    0.22    4.94
 -15   0   0    9.99    5.76
 -15   0   0    9.55    5.65
  15   0   0    4.28    3.49
 -16   0   0   92.93   13.33
 -16   0   0   72.33   12.07
 -16   0   0   51.83   10.78
 -16   0   0   68.39   11.46
  16   0   0   71.64   11.69
  16   0   0   74.27    8.15
 -17   0   0    2.72    6.49
   0  -1   0   -4.04    0.33
   0   1   0   -3.59    0.37
   0   1   0   -2.40    0.63
   0   1   0   -3.08    0.48
   0  -1   0   -3.33    0.38
   0  -1   0   -4.56    0.34
   0   1   0   -4.74    0.31
   0  -1   0   -2.71    0.37
   0   1   0   -2.74    0.48
   0   1   0    2.17    0.94
   1  -1   0  790.77   38.52
   1  -1   0  793.48   37.94
   1   1   0  955.75   38.93
  -1  -1   0  895.34   38.87
  -1   1   0  937.59   38.03
   1  -1   0  796.24   39.77
   1  -1   0  785.56   37.81
   1   1   0  859.53   38.45
  -1  -1   0  917.56   38.32
  -1   1   0 1049.51   38.18
  -1   1   0  894.98   38.93
   2  -1   0 4756.38  213.92
   2  -1   0 4606.47  203.09
  -2   1   0 4999.76  214.00
  -2   1   0 4945.73  211.58
  -2   1   0 4742.87  207.77
  -2  -1   0 4533.42  208.08
   2  -1   0 4706.98  213.60
   2  -1   0 4719.54  210.75
  -2  -1   0 4861.58  207.34
  -2  -1   0 4917.33  203.58
   2  -1   0 4870.88  204.28
  -3  -1   0  451.85   20.40
  -3   1   0  436.02   19.17
  -3  -1   0  440.07   20.16
   3  -1   0  411.54   19.12
  -3  -1   0  424.41   19.83
  -3   1   0  430.36   20.67
   3  -1   0  413.66   20.52
  -3   1   0  449.03   20.35
   3  -1   0  416.34   19.85
   3  -1   0  412.14   20.11
  -4  -1   0   27.08    3.46
   4  -1   0   14.98    2.50
   4  -1   0   14.55    1.91
  -4   1   0   20.41    3.22
  -4   1   0   19.66    1.56
   4  -1   0   16.64    1.63
  -4   1   0   37.28    3.51
  -4  -1   0   18.34    2.73
  -4  -1   0   19.95    2.24
  -5   1   0  166.19   10.18
  -5   1   0  174.02   10.44
   5  -1   0  170.54    8.54
   5  -1   0  147.74    9.33
  -5   1   0  171.35   10.63
  -5   1   0  167.55    8.21
  -5  -1   0  169.80    9.12
  -5  -1   0  192.06   10.67
  -5  -1   0  188.72   10.06
   5  -1   0  172.20   10.07
   5  -1   0  164.15    8.98
  -5   1   0  167.31   10.15
  -6  -1   0   13.80    2.91
  -6   1   0   10.32    3.15
  -6   1   0   10.35    2.97
  -6  -1   0   13.71    3.46
  -6   1   0   18.82    3.53
   6  -1   0   14.30    2.19
  -6  -1   0   18.86    3.29
  -6   1   0   11.72    2.94
  -6  -1   0   18.00    2.51
   6  -1   0   11.07    2.40
  -6  -1   0   17.35    3.58
  -6  -1   0   13.82    2.96
  -6  -1   0   11.66    2.91
  -6   1   0   13.46    1.61
   6  -1   0   11.84    2.86
  -6   1   0   10.91    3.11
  -7  -1   0    3.19    2.20
  -7   1   0    4.32    2.58
  -7  -1   0   13.50    3.53
   7   1   0    6.22    1.43
  -7  -1   0    5.76    1.96
  -7  -1   0    5.83    2.43
  -7  -1   0    7.67    2.80
  -7  -1   0    8.89    3.12
  -7   1   0    6.29    1.43
  -7  -1   0    8.54    2.84
  -7   1   0    8.66    3.00
  -7   1   0    7.03    2.70
  -7   1   0    4.56    2.47
   7  -1   0    5.59    1.83
   7  -1   0    3.90    2.19
   7   1   0    7.28    1.23
   7  -1   0    3.38    2.30
  -7   1   0    4.88    2.69
   8  -1   0    1.05    2.37
   8  -1   0    7.76    2.08
  -8  -1   0    6.25    2.93
   8   1   0    6.96    1.77
  -8  -1   0    8.63    3.34
  -8  -1   0    4.07    2.90
  -8   1   0    8.68    3.47
  -8  -1   0    4.02    2.81
  -8  -1   0    7.55    2.89
  -8   1   0    7.60    1.66
   8   1   0    5.65    1.42
   8  -1   0    4.74    2.24
  -8  -1   0    9.67    3.24
  -8   1   0   10.82    3.35
  -8   1   0    5.90    3.05
  -8   1   0    6.01    3.31
  -8  -1   0   10.98    2.47
  -8   1   0   16.06    4.06
  -9  -1   0   38.39    6.27
  -9  -1   0   45.33    6.52
  -9  -1   0   47.37    4.64
  -9   1   0   47.21    7.12
   9  -1   0   49.94    4.56
  -9  -1   0   47.61    6.70
   9  -1   0   56.41    6.99
   9   1   0   44.12    4.09
  -9  -1   0   49.73    6.77
   9   1   0   48.74    3.62
  -9   1   0   31.12    6.13
  -9   1   0   43.07    3.59
  -9  -1   0   44.04    4.61
  -9   1   0   52.76    6.42
   9  -1   0   42.51    5.27
  -9   1   0   38.73    6.62
  -9  -1   0   43.74    6.69
  -9   1   0   44.46    6.46
  -9  -1   0   47.62    6.44
 -10   1   0   86.73    8.96
 -10  -1   0   70.97    8.63
 -10   1   0   85.57    9.86
 -10  -1   0   81.21    9.07
 -10  -1   0  100.16    9.81
  10  -1   0   76.33    8.90
  10  -1   0   91.68    6.63
  10   1   0   71.77    6.16
 -10  -1   0   81.60    9.13
 -10  -1   0   81.42    9.34
 -10   1   0   69.14    9.19
 -10  -1   0   87.99    9.11
  10   1   0   84.02    5.62
 -10  -1   0  105.51    6.90
 -10   1   0   83.54    9.16
 -10   1   0   88.76    9.82
 -11   1   0  132.49   12.62
 -11  -1   0  155.64   13.43
 -11  -1   0  166.41   12.90
 -11   1   0  137.21   13.12
  11   1   0  165.11    9.26
 -11   1   0  138.06   13.55
 -11  -1   0  149.56   13.02
 -11  -1   0  154.78   12.90
 -11  -1   0  157.00   12.82
  11  -1   0  161.11   10.15
 -11   1   0  156.41   13.86
 -11   1   0  172.95   12.76
 -11  -1   0  156.06   12.53
  11  -1   0  155.60   12.41
 -12   1   0    4.55    4.24
 -12  -1   0    1.91    3.87
 -12  -1   0   11.20    5.20
 -12  -1   0   13.34    4.97
 -12  -1   0    4.75    4.51
  12  -1   0   11.60    5.13
 -12   1   0   11.70    5.43
 -12  -1   0   -0.81    3.50
  12  -1   0    2.81    3.04
 -12   1   0    1.15    4.05
  12   1   0    9.76    2.71
 -12   1   0    7.09    4.61
 -12   1   0    7.86    4.56
 -12  -1   0    8.70    4.35
 -13  -1   0   68.83    9.79
 -13   1   0   89.13   10.83
 -13  -1   0   62.45    9.87
 -13   1   0   43.95    8.26
 -13  -1   0   50.49    9.03
 -13   1   0   60.69    9.94
  13  -1   0   93.71   10.81
  13   1   0   74.66    6.19
 -13   1   0   73.01   10.59
 -13   1   0   69.84   10.62
 -13  -1   0   78.08   10.09
  13  -1   0   76.88    7.07
 -13  -1   0   66.47   10.01
  14  -1   0  114.92   12.98
 -14   1   0  114.74   13.44
 -14  -1   0  110.65   13.45
  14   1   0  141.60   14.16
  14   1   0  109.64    8.72
 -14  -1   0  126.68   13.82
 -14   1   0  107.42   12.26
 -14   1   0  105.13   13.17
 -14   1   0  140.20   14.58
  14  -1   0  132.50    9.80
 -14  -1   0  118.28   12.80
 -14   1   0  118.54   14.03
 -14  -1   0  130.70   13.36
 -14  -1   0  117.85   13.45
 -15   1   0   74.85   11.81
  15   1   0   39.48    5.75
 -15   1   0   59.06    9.89
 -15  -1   0   39.80    9.42
 -15  -1   0   63.74   10.66
 -15  -1   0   47.70    9.42
  15  -1   0   49.16    9.73
  15  -1   0   49.58    6.60
 -15  -1   0   38.19    8.63
  15   1   0   48.98    9.84
 -15   1   0   42.06    9.27
 -15   1   0   54.44   10.44
 -15   1   0   46.99    9.43
 -15  -1   0   26.57    7.52
  16   1   0   54.04   10.80
 -16  -1   0   37.14    9.19
  16  -1   0   47.74    7.11
  16   1   0   41.88    6.39
 -16   1   0   51.73   10.58
 -16   1   0   42.82    9.55
 -16  -1   0   47.18   10.19
 -16   1   0   39.62    9.78
 -16  -1   0   48.66   10.00
  16  -1   0   31.93    8.46
 -16  -1   0   63.31   11.49
 -16   1   0   37.65    9.21
   0   2   0 3297.08  142.48
   0   2   0 3407.20  140.05
   0  -2   0 3170.42  139.56
   0   2   0 3269.41  141.87
   0  -2   0 3381.78  141.88
   0  -2   0 3326.00  139.44
   0  -2   0 3459.20  146.39
   0   2   0 3326.14  146.39
   0   2   0 2767.97  146.67
   1   2   0 1902.04   87.38
   1  -2   0 1983.34   86.28
  -1   2   0 2060.91   87.84
   1   2   0 2036.19   90.82
  -1  -2   0 1999.79   87.41
  -1  -2   0 1983.68   88.23
  -1  -2   0 1996.48   86.59
   1  -2   0 2115.47   88.08
   1   2   0 2075.72   86.13
   1  -2   0 1957.51   86.21
   1   2   0 1970.91   90.29
  -1  -2   0 2050.07   90.23
  -1   2   0 2041.35   91.25
  -1   2   0 1955.20   86.64
   2  -2   0   46.72    3.64
   2  -2   0   53.61    3.21
  -2   2   0   50.17    3.93
   2  -2   0   50.99    2.93
  -2  -2   0   54.99    3.73
  -2   2   0   49.32    3.40
   2   2   0   46.17    3.39
  -2   2   0   49.79    2.91
   2  -2   0   61.25    4.08
  -2   2   0   50.06    4.23
   2   2   0   53.60    3.25
  -2  -2   0   56.17    3.30
  -2  -2   0   54.71    4.19
   3  -2   0   52.97    4.74
  -3   2   0   55.18    3.05
  -3   2   0   61.68    3.47
  -3  -2   0   50.56    4.00
   3  -2   0   61.47    4.37
   3   2   0   54.89    3.29
  -3   2   0   60.73    4.36
  -3  -2   0   57.11    3.86
   3   2   0   59.80    3.50
   3  -2   0   48.07    3.35
  -3   2   0   53.91    4.54
  -3   2   0   56.18    3.22
  -3   2   0   55.75    3.44
  -3   2   0   57.87    4.59
   3  -2   0   55.30    4.07
  -3  -2   0   56.70    4.67
   3  -2   0   54.53    3.00
   4   2   0   29.68    2.09
   4   2   0   26.97    2.01
  -4   2   0   32.60    2.35
   4  -2   0   32.97    3.66
  -4  -2   0   31.19    3.29
  -4   2   0   36.35    3.78
   4  -2   0   30.14    1.84
  -4   2   0   35.14    2.09
  -4  -2   0   34.98    3.37
   4  -2   0   31.63    2.47
   4  -2   0   37.07    3.35
   4  -2   0   34.18    4.01
  -4  -2   0   31.84    4.04
  -4   2   0   33.78    3.71
  -4   2   0   38.05    4.30
  -5  -2   0  538.61   25.94
   5  -2   0  503.78   26.74
  -5  -2   0  549.81   25.73
   5  -2   0  546.73   25.81
  -5   2   0  540.71   26.51
   5  -2   0  511.37   25.97
   5  -2   0  548.28   23.91
  -5   2   0  520.33   25.96
  -5  -2   0  528.07   26.47
   5   2   0  520.67   24.51
  -5  -2   0  568.72   26.09
   5  -2   0  526.05   23.80
  -5   2   0  559.16   22.95
  -5   2   0  526.84   26.37
  -5   2   0  550.55   26.94
  -5  -2   0  555.98   25.64
  -6   2   0   41.62    5.64
   6  -2   0   39.24    4.95
  -6   2   0   49.09    5.98
  -6  -2   0   40.42    5.39
   6  -2   0   43.33    2.56
   6  -2   0   41.85    4.92
  -6  -2   0   44.77    4.85
   6  -2   0   37.73    4.83
  -6  -2   0   46.08    4.33
  -6   2   0   39.36    5.04
   6   2   0   39.71    2.52
  -6  -2   0   42.52    4.78
  -6  -2   0   46.21    5.41
  -6  -2   0   41.37    4.28
  -6  -2   0   38.80    4.43
  -6   2   0   36.13    5.41
  -6  -2   0   41.83    4.74
   6  -2   0   41.05    4.05
   7  -2   0    3.95    1.10
  -7   2   0    6.50    3.17
  -7  -2   0    2.39    2.15
  -7   2   0    7.44    2.85
  -7  -2   0    4.01    2.57
   7  -2   0    0.23    2.19
  -7  -2   0    2.95    2.29
  -7   2   0    5.10    0.98
   7  -2   0   -1.36    2.13
  -7  -2   0    2.99    2.19
  -7  -2   0   10.06    3.53
   7  -2   0    5.84    2.20
  -7   2   0    8.00    3.09
   7   2   0    4.29    1.18
  -7   2   0   10.85    3.51
  -7  -2   0    0.95    2.09
  -7  -2   0    6.15    2.13
  -7  -2   0    5.36    2.11
   7   2   0    6.33    1.11
  -8  -2   0  226.68   13.96
  -8  -2   0  200.99   13.92
  -8   2   0  214.46   14.82
   8   2   0  239.03   11.35
  -8  -2   0  202.87   13.65
  -8   2   0  216.30   14.49
  -8  -2   0  228.02   14.52
  -8  -2   0  238.31   13.07
  -8   2   0  229.92   14.94
  -8  -2   0  254.55   12.91
  -8   2   0  222.17   14.53
   8  -2   0  223.97   14.16
  -8  -2   0  230.15   14.95
   8  -2   0  234.60   13.13
  -8   2   0  228.35   10.77
   8  -2   0  243.26   14.49
   8   2   0  234.88   11.53
  -9   2   0  315.61   20.06
  -9   2   0  333.50   20.21
  -9  -2   0  327.20   19.83
   9   2   0  346.94   16.62
  -9   2   0  335.96   20.54
  -9  -2   0  352.12   19.77
  -9   2   0  348.23   20.91
  -9  -2   0  329.40   19.35
   9  -2   0  315.77   19.37
  -9  -2   0  346.02   18.12
  -9  -2   0  349.63   17.76
  -9  -2   0  349.20   20.57
   9   2   0  351.79   17.01
  -9  -2   0  356.73   20.13
   9  -2   0  345.85   18.41
  -9  -2   0  347.74   19.65
  -9   2   0  340.70   19.13
 -10  -2   0   81.35    9.38
 -10   2   0   91.16    8.95
 -10  -2   0   68.22    8.54
  10  -2   0   79.84    8.79
 -10  -2   0   86.71    9.52
  10  -2   0   62.27    6.47
 -10   2   0   92.68    9.55
 -10  -2   0   82.58    9.03
  10   2   0   77.93    5.79
 -10  -2   0   77.09    8.78
 -10   2   0   87.04    9.92
 -10   2   0   67.13    8.95
 -10  -2   0   90.62    8.80
  10   2   0   76.65    5.24
 -10  -2   0   85.18    7.14
 -10   2   0   72.23    9.24
  11   2   0   50.68    4.28
  11  -2   0   39.61    5.01
 -11   2   0   38.00    7.62
 -11   2   0   42.90    8.02
 -11   2   0   33.71    6.96
  11   2   0   40.36    5.42
 -11  -2   0   47.44    7.86
 -11  -2   0   36.93    7.31
 -11  -2   0   55.39    7.96
 -11  -2   0   49.74    7.39
 -11   2   0   34.97    7.28
 -11  -2   0   43.87    7.77
 -11  -2   0   58.68    8.28
  11  -2   0   35.06    6.80
 -11  -2   0   52.02    5.85
 -12  -2   0   -0.02    3.43
 -12  -2   0   -3.62    3.67
 -12   2   0    5.00    4.34
  12  -2   0   -1.74    3.43
  12   2   0    2.37    2.20
 -12  -2   0   -3.63    3.43
 -12  -2   0    6.42    3.98
 -12  -2   0    2.96    3.95
 -12   2   0    1.79    4.09
 -12  -2   0   -2.31    3.25
 -12   2   0    5.09    4.08
 -12   2   0   -0.47    3.43
  12  -2   0    1.93    2.64
 -13   2   0    5.90    4.63
  13  -2   0    4.50    4.49
 -13  -2   0    5.81    4.43
  13  -2   0    3.65    3.14
 -13  -2   0    2.21    3.87
 -13  -2   0   -0.92    4.02
 -13   2   0    0.69    4.03
  13   2   0    0.59    2.44
 -13   2   0    1.64    4.34
 -13   2   0   -0.90    3.88
 -13  -2   0   14.17    4.91
 -13  -2   0    0.73    4.23
 -13  -2   0    1.83    4.70
  14  -2   0    0.34    3.16
 -14  -2   0   -6.21    3.92
 -14   2   0    5.35    4.34
 -14  -2   0    0.51    5.18
 -14  -2   0   -0.07    4.35
 -14   2   0   -0.24    4.39
 -14   2   0    1.67    4.21
  14   2   0   -0.76    2.63
 -14  -2   0   -0.33    4.69
 -14  -2   0    0.29    4.76
 -14  -2   0    4.73    5.26
  14  -2   0    1.99    4.39
 -14   2   0    0.44    4.60
  15  -2   0    1.48    5.34
 -15   2   0    3.20    4.42
  15  -2   0    5.44    5.76
 -15   2   0   -2.72    4.46
 -15  -2   0    3.14    5.38
 -15  -2   0    5.47    5.44
 -15   2   0    5.74    5.85
 -15   2   0   21.37    6.34
 -15  -2   0   -1.56    5.01
  15   2   0    2.55    3.48
 -15  -2   0   -0.36    5.29
  15  -2   0   -1.32    3.28
 -15  -2   0    6.54    5.50
 -16  -2   0   14.81    7.26
 -16   2   0   12.02    6.30
  16  -2   0   18.16    5.31
  16   2   0   11.45    4.62
 -16   2   0   13.58    6.81
  16   2   0   11.10    7.30
 -16   2   0   12.73    6.28
 -16  -2   0   16.35    7.64
 -16  -2   0    6.29    6.44
  16  -2   0   22.55    7.77
  16  -2   0    9.77    6.71
 -16  -2   0   24.40    8.25
 -16  -2   0   10.98    7.12
   0  -3   0   -0.35    0.82
   0  -3   0   -0.09    0.93
   0   3   0    2.17    1.31
   0   3   0    0.10    0.78
   0  -3   0    0.58    1.20
   0   3   0   -1.44    1.15
   0  -3   0   -1.78    0.81
   0  -3   0    1.00    1.02
   1  -3   0   61.76    4.46
  -1  -3   0   67.00    4.44
  -1   3   0   71.37    4.29
  -1  -3   0   70.25    3.77
  -1  -3   0   72.91    5.18
  -1  -3   0   73.52    4.22
  -1   3   0   52.24    5.36
   1  -3   0   65.98    4.89
  -1  -3   0   77.22    3.66
  -1  -3   0   70.23    4.12
   1   3   0   64.67    5.20
  -1   3   0   64.38    4.54
   1   3   0   71.10    4.72
   1  -3   0   64.23    4.08
   1  -3   0   60.51    4.67
   1   3   0   65.75    4.20
   2   3   0  328.90   16.43
  -2   3   0  304.38   15.94
   2   3   0  324.27   17.01
   2  -3   0  331.86   16.50
  -2   3   0  349.20   15.44
  -2   3   0  335.86   17.91
  -2  -3   0  316.83   16.40
   2  -3   0  339.55   15.58
  -2   3   0  343.16   15.58
  -2  -3   0  335.18   15.63
  -2  -3   0  357.45   14.49
  -2  -3   0  316.08   16.81
  -3   3   0  308.53   15.61
   3  -3   0  305.24   15.48
   3  -3   0  329.11   14.57
  -3  -3   0  294.14   15.48
   3  -3   0  284.39   15.84
  -3  -3   0  312.93   16.27
  -3   3   0  301.67   14.16
  -3   3   0  307.33   14.30
   3   3   0  324.98   15.16
  -3   3   0  304.78   16.00
  -3  -3   0  295.81   14.72
   3   3   0  317.01   15.62
  -3   3   0  301.50   16.73
  -3   3   0  284.01   14.69
  -4   3   0  239.60   12.99
  -4  -3   0  224.07   12.30
  -4  -3   0  238.93   12.19
  -4   3   0  237.17   13.61
  -4  -3   0  236.89   13.58
   4  -3   0  237.73   11.56
  -4   3   0  236.44   11.03
  -4  -3   0  223.00   13.00
  -4  -3   0  242.91   12.75
   4   3   0  233.78   11.79
  -4   3   0  231.93   13.43
   4  -3   0  242.24   13.05
   4   3   0  231.71   12.13
  -4   3   0  232.40   11.38
   4  -3   0  232.45   12.81
  -4   3   0  224.06   11.41
   5   3   0  212.02   10.92
  -5   3   0  211.35   13.13
   5  -3   0  227.38   11.01
   5  -3   0  213.50   12.37
  -5   3   0  217.64   13.07
  -5  -3   0  204.68   12.71
   5  -3   0  208.33   11.98
  -5  -3   0  195.27   12.93
  -5   3   0  233.83   13.04
   5   3   0  210.69   11.19
  -5   3   0  224.57   10.67
  -5   3   0  216.52   12.88
  -5  -3   0  243.11   12.19
  -5  -3   0  223.07   12.22
   5  -3   0  215.12   12.40
   5  -3   0  203.10   13.38
  -5   3   0  217.89   10.27
  -5   3   0  213.08   12.66
  -5  -3   0  223.67   12.05
   5  -3   0  213.36   10.04
  -6   3   0  121.00    8.84
  -6   3   0  105.22    8.25
  -6   3   0  106.04    5.70
  -6   3   0   96.29    7.97
   6  -3   0   93.68    7.57
  -6  -3   0  100.73    7.19
  -6  -3   0  101.13    7.15
   6  -3   0  104.45    6.20
   6  -3   0  109.71    8.73
  -6  -3   0  106.85    8.59
  -6   3   0  115.31    8.82
  -6  -3   0  116.34    7.50
  -6  -3   0   99.77    8.33
   6   3   0   99.10    5.90
  -6  -3   0  106.39    7.26
   6  -3   0  108.51    8.09
  -6  -3   0   96.66    7.29
   6  -3   0  105.47    7.41
   6   3   0  100.70    6.03
  -6  -3   0  102.17    7.33
   7  -3   0  458.04   23.40
   7   3   0  447.41   21.38
   7  -3   0  427.58   23.29
  -7  -3   0  434.34   23.72
   7  -3   0  478.83   25.07
  -7  -3   0  420.28   22.40
  -7   3   0  424.25   23.60
   7  -3   0  463.87   21.04
  -7  -3   0  469.34   22.94
  -7  -3   0  441.18   23.29
  -7   3   0  457.23   24.22
  -7  -3   0  443.14   24.37
  -7   3   0  438.62   24.15
  -7   3   0  449.81   24.71
  -7  -3   0  467.40   22.92
   7   3   0  457.96   21.49
  -7  -3   0  470.93   23.01
  -7  -3   0  453.28   22.26
   7  -3   0  416.03   22.71
  -8  -3   0    4.23    2.73
  -8  -3   0    3.68    2.41
  -8  -3   0    5.51    2.48
  -8  -3   0    6.11    3.39
   8  -3   0    5.91    3.09
   8  -3   0    2.05    2.16
  -8  -3   0    5.30    2.85
   8   3   0    4.64    1.73
  -8  -3   0   10.10    4.21
  -8   3   0    6.28    3.18
  -8  -3   0    7.04    2.78
  -8   3   0    0.06    2.81
   8  -3   0    4.79    2.94
  -8   3   0    0.22    2.17
  -8  -3   0    7.23    2.98
  -8   3   0    2.11    2.93
   8   3   0    5.61    1.67
  -9  -3   0   46.44    7.47
   9  -3   0   59.32    7.20
  -9  -3   0   51.19    6.36
  -9   3   0   56.93    7.46
  -9  -3   0   57.71    6.09
   9   3   0   48.76    4.02
  -9  -3   0   69.87    7.42
  -9   3   0   43.51    7.65
  -9  -3   0   59.13    7.91
  -9  -3   0   39.97    6.24
  -9   3   0   55.59    7.89
  -9  -3   0   48.97    6.75
  -9   3   0   51.67    7.79
   9  -3   0   52.82    6.84
   9   3   0   47.69    4.14
   9  -3   0   50.55    5.71
 -10  -3   0    1.23    3.51
 -10  -3   0    2.13    3.46
 -10   3   0   -1.80    3.08
 -10   3   0   -0.55    3.33
  10   3   0   -1.84    2.30
 -10   3   0    4.24    4.00
 -10  -3   0    4.76    3.09
  10  -3   0    1.62    3.02
 -10  -3   0   -0.57    2.93
  10   3   0    0.88    1.98
  10   3   0    1.00    1.58
 -10  -3   0    2.07    3.00
  10  -3   0    0.39    2.45
 -10  -3   0    1.11    3.01
  10  -3   0    1.27    3.61
 -10  -3   0    0.49    3.27
 -10   3   0    2.39    2.89
  11   3   0   66.02    7.30
 -11   3   0   73.65    9.99
 -11   3   0   67.42    9.35
 -11  -3   0   83.04   10.29
 -11  -3   0   81.04    9.48
  11  -3   0   79.46    9.35
 -11   3   0   74.98   10.05
 -11   3   0   97.16   11.33
  11  -3   0   70.20    7.28
  11   3   0   82.42    5.82
 -11  -3   0   81.85    9.60
 -11  -3   0   71.25    9.06
  11  -3   0   75.23    9.12
 -11  -3   0   77.61   10.15
 -11  -3   0   68.92    8.53
 -11  -3   0   76.13    7.58
  12   3   0   34.91    5.48
 -12  -3   0   37.82    7.85
 -12   3   0   41.03    8.21
 -12  -3   0   34.31    5.61
  12  -3   0   30.48    5.49
 -12  -3   0   40.81    7.36
  12  -3   0   34.84    6.97
 -12  -3   0   24.69    6.31
  12   3   0   38.14    4.23
  12  -3   0   33.81    7.01
 -12  -3   0   40.06    7.58
 -12   3   0   37.82    8.40
 -12  -3   0   31.07    6.57
 -12   3   0   34.98    7.74
 -12   3   0   35.79    7.55
 -12  -3   0   37.45    7.98
 -13  -3   0   41.71    8.63
 -13  -3   0   53.76    9.05
 -13   3   0   26.75    7.31
 -13  -3   0   47.97    8.35
 -13  -3   0   21.04    7.38
 -13   3   0   30.65    7.65
 -13   3   0   23.88    6.80
  13   3   0   39.43    4.65
  13  -3   0   31.45    5.74
 -13  -3   0   29.78    6.98
  13  -3   0   43.32    7.89
  13  -3   0   31.17    7.50
 -13   3   0   36.17    8.19
 -13  -3   0   32.61    7.88
  14   3   0    4.00    2.98
 -14   3   0    0.73    4.66
  14  -3   0    0.53    4.56
 -14   3   0   -2.35    3.74
 -14  -3   0    4.97    5.40
 -14  -3   0    1.99    4.67
 -14  -3   0   -3.48    3.93
 -14  -3   0   -1.47    4.42
  14  -3   0    4.84    5.22
 -14   3   0   -3.83    3.73
 -14  -3   0    6.29    5.33
  14  -3   0   -0.42    3.64
 -14   3   0   -0.39    4.57
 -15   3   0   -2.01    4.99
 -15   3   0   -4.12    4.48
 -15  -3   0   12.54    6.73
 -15  -3   0   -0.23    5.07
 -15  -3   0    1.91    5.09
 -15  -3   0    2.48    5.61
  15  -3   0    6.30    5.68
 -15   3   0    0.76    4.28
 -15  -3   0    8.95    6.38
  15  -3   0    0.01    3.50
 -15   3   0    2.83    5.02
  15  -3   0   -1.90    4.59
  15   3   0    3.74    3.35
  16  -3   0    6.31    6.34
 -16   3   0   16.45    6.91
 -16   3   0   -5.04    4.69
  16   3   0   10.53    4.17
 -16   3   0    7.22    6.23
 -16  -3   0    0.33    6.26
 -16  -3   0   -0.71    5.64
 -16  -3   0    2.52    6.45
 -16  -3   0   13.35    6.42
 -16  -3   0   27.41    8.28
   0   4   0   83.66    6.68
   0  -4   0   77.21    5.42
   0  -4   0   69.49    5.46
   0  -4   0   79.86    5.05
   0   4   0   87.55    5.44
   0  -4   0   72.76    4.59
   0   4   0   78.98    5.46
   0  -4   0   75.97    6.00
  -1   4   0  488.79   22.98
   1   4   0  491.87   23.26
  -1   4   0  505.79   22.00
  -1  -4   0  488.63   21.39
  -1  -4   0  455.46   23.38
  -1  -4   0  463.67   21.79
   1   4   0  480.67   22.42
   1  -4   0  482.93   24.00
  -1  -4   0  477.16   23.66
   1  -4   0  478.32   23.49
   1  -4   0  478.12   22.92
   1  -4   0  464.91   21.95
  -1   4   0  511.22   22.78
   1   4   0  481.82   24.86
  -1  -4   0  461.27   22.19
   1  -4   0  488.31   22.66
  -2  -4   0   -0.35    1.43
   2  -4   0    4.25    1.54
  -2  -4   0    0.48    1.01
   2   4   0    4.69    1.49
   2  -4   0    2.16    1.70
   2   4   0    3.73    1.94
   2  -4   0    2.05    1.44
   2  -4   0    2.65    1.72
   2   4   0    3.78    1.64
  -2  -4   0    5.63    1.29
  -2  -4   0    7.71    2.44
  -2   4   0    3.16    1.70
  -2  -4   0    6.41    1.92
  -2   4   0    5.12    2.44
   2  -4   0    2.36    1.74
  -2  -4   0    1.25    1.21
  -2   4   0    1.84    1.10
  -2   4   0    4.47    1.60
  -2   4   0    2.19    1.09
   3  -4   0   -0.80    0.97
   3   4   0   -0.50    1.23
  -3   4   0   -0.84    1.09
   3   4   0   -0.12    1.59
   3  -4   0    2.97    1.84
  -3   4   0    1.17    1.01
  -3   4   0    1.84    1.05
  -3  -4   0    2.34    1.69
   3  -4   0    2.64    1.96
   3  -4   0    0.25    1.57
  -3  -4   0    1.48    1.58
  -3   4   0    1.06    1.33
   3  -4   0   -0.39    1.29
  -3   4   0   -0.12    2.19
  -3  -4   0   -0.83    1.79
  -3  -4   0    2.93    1.21
  -3  -4   0    1.32    1.54
   4  -4   0  117.02    8.03
   4  -4   0  109.03    7.89
  -4  -4   0   92.80    8.59
  -4   4   0  103.36    8.14
  -4  -4   0  117.93    6.97
  -4   4   0  107.74    8.74
  -4   4   0  118.52    6.24
  -4   4   0  113.95    8.07
   4  -4   0  125.48    8.04
  -4  -4   0  108.05    7.66
  -4   4   0  119.37    7.93
   4   4   0  116.48    7.72
  -4  -4   0   97.11    8.19
  -4   4   0  108.56    6.75
  -4  -4   0  118.55    7.78
   4  -4   0  122.44    6.92
  -4   4   0  106.36    6.96
  -4   4   0  111.81    8.10
   4   4   0  109.40    7.02
  -5  -4   0  107.20    7.59
  -5   4   0   93.29    8.03
  -5   4   0  104.43    5.62
  -5  -4   0   99.81    6.61
  -5   4   0  111.52    8.38
  -5  -4   0  126.84    9.10
  -5  -4   0   97.63    6.71
  -5   4   0  117.44    8.13
   5  -4   0  105.70    7.67
   5  -4   0   92.06    6.37
  -5   4   0  103.00    8.62
   5  -4   0   94.06    7.51
  -5  -4   0  106.29    7.52
  -5   4   0   97.03    6.24
  -5   4   0  103.49    8.14
  -5   4   0   89.98    6.08
  -5  -4   0  101.47    6.88
   5  -4   0  106.98    8.18
   5   4   0   99.79    6.54
   5   4   0   93.17    6.83
  -5  -4   0  105.22    8.78
  -6  -4   0  635.36   30.66
  -6  -4   0  659.06   33.53
  -6   4   0  628.53   32.94
  -6   4   0  650.05   29.68
   6  -4   0  674.48   30.40
  -6   4   0  687.87   33.10
  -6   4   0  669.29   29.47
   6   4   0  663.94   31.41
  -6  -4   0  635.21   30.96
  -6  -4   0  660.11   31.41
  -6  -4   0  681.06   31.92
  -6  -4   0  650.67   32.46
  -6   4   0  667.18   33.67
   6  -4   0  666.26   31.55
  -6   4   0  701.02   33.93
  -6   4   0  655.98   32.44
  -6  -4   0  676.22   32.31
   6  -4   0  675.34   33.23
   6  -4   0  643.87   32.27
  -6   4   0  645.83   29.43
   6   4   0  654.61   31.89
   7  -4   0   34.46    5.26
   7  -4   0   36.14    4.94
  -7  -4   0   28.55    4.05
  -7   4   0   23.47    5.05
  -7   4   0   24.53    5.38
   7  -4   0   25.71    3.46
  -7   4   0   28.15    5.24
  -7  -4   0   24.88    4.23
  -7  -4   0   25.82    4.27
  -7   4   0   21.78    5.02
   7   4   0   26.53    3.40
   7   4   0   25.85    3.18
  -7  -4   0   27.96    4.47
   7  -4   0   19.78    4.43
  -7   4   0   26.58    2.78
  -7  -4   0   26.54    4.37
  -7  -4   0   16.21    4.64
  -7  -4   0   25.69    5.40
  -8  -4   0  114.90   10.58
  -8  -4   0   98.48    8.66
  -8   4   0   94.03    9.84
  -8  -4   0  102.41    8.15
  -8  -4   0   88.05    7.55
  -8   4   0   96.25   10.20
  -8   4   0   99.95    5.29
   8   4   0   95.11    6.51
  -8  -4   0   97.41    7.93
   8  -4   0   95.90    8.77
  -8  -4   0  105.20    8.18
   8  -4   0   95.32    7.97
  -8  -4   0  107.78   10.23
  -8   4   0   99.28   10.27
   8  -4   0  110.76    9.40
   8   4   0   91.31    6.68
  -8   4   0   92.72    9.32
  -9  -4   0  132.74    9.90
  -9  -4   0  145.19   12.31
  -9   4   0  146.43   12.98
  -9  -4   0  112.60    9.66
   9   4   0  143.57   10.27
  -9   4   0  127.68   12.35
   9   4   0  127.90    8.39
  -9  -4   0  109.38   10.38
  -9  -4   0  156.69   10.44
   9  -4   0  125.43   10.89
   9  -4   0  163.26   10.75
   9  -4   0  118.52   10.86
  -9   4   0  144.52   11.64
  -9  -4   0  129.37   10.13
  -9   4   0  152.49   12.80
  -9  -4   0  145.28   12.90
  10  -4   0   25.24    6.25
 -10   4   0   38.45    7.71
 -10  -4   0   33.14    6.20
  10  -4   0   23.18    5.83
 -10   4   0   31.99    6.85
 -10   4   0   33.54    6.54
 -10  -4   0   39.89    6.61
 -10  -4   0   27.89    6.91
  10   4   0   24.22    3.59
  10   4   0   34.60    5.55
 -10  -4   0   22.28    5.53
 -10  -4   0   20.70    6.00
 -10  -4   0   44.11    6.16
  10  -4   0   20.25    4.79
 -10   4   0   28.22    6.45
  11  -4   0   13.76    5.44
  11   4   0   14.04    4.36
 -11   4   0   18.14    6.38
 -11  -4   0    8.61    5.12
 -11   4   0    7.77    4.29
 -11  -4   0   18.83    5.36
  11   4   0   15.02    3.17
 -11  -4   0   13.55    5.05
  11  -4   0   17.33    4.47
 -11   4   0   13.03    5.31
  11  -4   0   10.62    4.83
 -11  -4   0   13.81    4.88
 -11   4   0   16.67    5.70
 -11  -4   0   23.79    6.30
 -11  -4   0   12.90    4.21
 -12  -4   0    4.30    4.12
 -12   4   0    0.77    4.68
 -12  -4   0   12.86    5.75
 -12  -4   0   13.32    5.08
  12  -4   0   -1.28    2.93
 -12  -4   0   -1.73    4.50
 -12   4   0    6.73    4.75
  12   4   0    8.21    4.07
 -12  -4   0    1.72    3.82
 -12  -4   0   -0.52    3.05
 -12   4   0    3.59    4.59
  12   4   0    1.72    2.53
  12  -4   0    2.70    4.15
 -12   4   0    6.22    4.56
  12  -4   0    2.41    4.29
 -13  -4   0   -3.75    3.63
  13   4   0    3.05    2.84
  13  -4   0    4.16    4.47
  13  -4   0    3.74    3.52
 -13   4   0    0.00    4.15
 -13   4   0    3.00    4.96
 -13   4   0   -0.08    3.74
 -13  -4   0    0.88    4.12
  13  -4   0    0.55    4.39
 -13  -4   0    2.11    4.17
 -13   4   0   -5.15    3.66
 -13  -4   0    5.83    4.63
 -13  -4   0    1.27    3.55
 -13  -4   0    4.99    5.06
 -14  -4   0    4.44    4.79
 -14   4   0   21.90    7.51
 -14  -4   0   12.91    6.74
  14   4   0   15.90    4.08
  14  -4   0   15.82    6.48
  14  -4   0    9.02    4.83
 -14  -4   0    9.30    6.06
  14  -4   0   12.11    5.85
 -14   4   0    6.25    5.93
 -14  -4   0   10.34    6.07
 -14   4   0   15.56    6.25
 -14   4   0   24.27    7.33
 -14  -4   0   18.32    5.95
 -15   4   0    4.69    5.94
 -15  -4   0    1.73    5.67
 -15   4   0    5.37    5.48
 -15  -4   0    9.20    6.63
 -15  -4   0    1.46    5.78
 -15  -4   0   -1.87    5.56
  15   4   0    3.57    3.68
 -15   4   0   -1.68    5.23
  15  -4   0    3.65    4.55
 -15  -4   0   -2.08    4.90
  15  -4   0    2.76    5.41
 -15   4   0   -1.83    4.86
  15  -4   0   -3.75    4.94
 -16   4   0    2.84    6.03
  16   4   0    2.48    3.78
 -16   4   0    5.91    6.48
 -16   4   0    6.80    6.17
 -16  -4   0   15.89    7.37
 -16  -4   0    7.64    6.37
 -16  -4   0   11.81    6.66
 -16  -4   0   -1.64    5.31
  16  -4   0    6.71    6.18
   0   5   0   -0.25    1.70
   0  -5   0   -0.48    1.16
   0  -5   0    0.40    1.53
   0  -5   0    0.12    1.33
   0  -5   0   -0.24    1.82
   0   5   0   -0.30    1.12
   0   5   0    0.98    1.88
   0  -5   0   -1.01    1.48
   0  -5   0    1.89    1.77
   0  -5   0   -0.29    1.40
   1   5   0  119.55    7.65
   1   5   0  114.48    7.67
   1  -5   0  122.14    6.85
  -1  -5   0  116.32    7.75
  -1   5   0  116.15    7.21
   1  -5   0  111.00    8.16
  -1  -5   0  119.08    7.74
   1   5   0  116.80    9.09
  -1  -5   0  111.38    6.80
   1  -5   0  113.72    7.81
   1  -5   0  120.72    7.41
  -1  -5   0  113.07    6.21
  -1  -5   0  120.21    8.49
  -1   5   0  125.71    7.45
   1  -5   0  117.04    7.40
   1  -5   0  120.49    8.52
  -1   5   0  122.66    7.97
  -1  -5   0  107.29    7.08
   1  -5   0  116.68    8.11
  -1  -5   0  109.01    8.48
   2   5   0    2.88    2.54
  -2   5   0    5.66    2.02
  -2  -5   0    5.19    2.53
   2  -5   0    7.43    2.39
  -2   5   0    9.59    2.15
  -2   5   0    8.66    1.96
   2  -5   0    7.59    2.58
   2  -5   0    4.63    1.89
  -2   5   0    5.22    2.48
   2  -5   0    9.53    2.79
  -2  -5   0   11.84    1.97
   2   5   0    9.61    2.51
   2  -5   0    7.29    2.60
  -2  -5   0    5.27    1.55
  -2  -5   0   10.75    3.24
   2  -5   0    4.96    2.55
  -2  -5   0    9.37    2.63
  -2  -5   0    3.47    1.67
  -2   5   0    6.28    3.28
   2   5   0    4.91    2.17
   2   5   0    3.42    2.17
  -3   5   0  281.26   14.21
  -3   5   0  281.54   14.41
   3  -5   0  297.03   15.90
  -3   5   0  299.93   15.56
   3  -5   0  278.82   15.54
   3  -5   0  280.15   14.31
  -3   5   0  306.39   17.93
   3   5   0  269.56   15.54
  -3   5   0  279.57   15.13
  -3  -5   0  275.88   16.15
   3  -5   0  266.36   16.03
   3   5   0  304.47   15.84
  -3  -5   0  279.11   14.20
  -3   5   0  299.52   15.52
  -3   5   0  282.40   15.22
  -3  -5   0  269.68   15.28
  -3  -5   0  294.90   12.65
   3  -5   0  276.80   15.88
   3  -5   0  293.75   15.67
   3   5   0  304.27   14.16
   3   5   0  279.38   16.54
  -3  -5   0  245.27   16.17
  -4   5   0  413.90   21.09
   4  -5   0  442.70   23.19
  -4   5   0  452.69   21.14
  -4  -5   0  440.26   24.09
  -4   5   0  450.45   22.06
   4  -5   0  445.75   21.45
  -4   5   0  445.85   25.12
   4   5   0  448.96   22.91
  -4   5   0  448.17   22.99
   4   5   0  453.05   23.90
  -4  -5   0  435.93   22.58
  -4   5   0  461.88   22.89
  -4  -5   0  462.07   21.71
   4  -5   0  425.42   22.51
  -4   5   0  463.73   23.18
  -4  -5   0  451.60   23.71
   4  -5   0  452.69   22.71
   4  -5   0  470.69   23.85
   5   5   0  438.64   23.03
  -5   5   0  436.92   22.63
  -5   5   0  413.09   22.79
  -5   5   0  478.63   23.67
  -5   5   0  418.67   20.27
   5  -5   0  454.15   22.62
  -5  -5   0  442.03   20.97
  -5  -5   0  415.91   22.10
   5  -5   0  434.64   21.05
   5  -5   0  445.68   23.42
  -5   5   0  398.45   22.54
  -5  -5   0  432.46   20.66
  -5  -5   0  421.20   23.12
  -5   5   0  443.49   20.73
  -5  -5   0  404.76   23.66
  -5  -5   0  416.33   21.32
   5  -5   0  438.50   22.87
  -5   5   0  409.68   20.96
   5  -5   0  417.33   22.21
  -5   5   0  464.31   24.71
   5   5   0  442.11   22.12
  -6   5   0  105.96    9.76
  -6   5   0  113.08    6.56
  -6  -5   0  115.63   10.40
   6   5   0  133.64    8.33
   6   5   0  116.12    8.55
  -6   5   0  115.46    7.03
  -6  -5   0  131.16    8.37
   6  -5   0  117.55    7.75
   6  -5   0  103.71    8.74
  -6  -5   0  110.06    8.65
  -6  -5   0  120.41   10.80
  -6  -5   0  114.10    7.82
  -6   5   0  120.21    9.86
  -6   5   0  113.78    9.39
   6  -5   0  118.41    9.08
   6  -5   0  119.56    9.09
  -6   5   0  107.62    7.24
   6  -5   0  133.64    9.60
  -6   5   0   99.17    8.87
  -6  -5   0  118.55    7.92
   7  -5   0    1.00    2.34
  -7  -5   0    2.01    2.25
   7   5   0   -0.29    2.05
  -7  -5   0    1.99    2.61
   7  -5   0   -0.74    2.47
   7  -5   0    2.92    3.03
   7  -5   0    2.01    2.82
  -7  -5   0    0.09    2.14
  -7  -5   0    1.01    3.33
  -7   5   0   -1.99    2.70
  -7   5   0    1.07    3.12
  -7   5   0   -0.08    2.98
  -7  -5   0   -0.21    2.80
  -7  -5   0   -0.37    1.84
  -7   5   0    0.91    2.52
   7   5   0    0.42    2.00
  -7   5   0    0.31    1.32
  -8   5   0    5.75    3.36
   8   5   0    1.12    2.06
  -8   5   0    3.34    3.75
  -8  -5   0   -0.17    3.12
   8  -5   0    0.28    2.97
  -8  -5   0   -0.31    2.44
   8   5   0   -2.06    2.03
   8  -5   0    2.17    3.39
  -8  -5   0    2.07    3.10
  -8   5   0    1.55    3.61
   8  -5   0    0.28    3.40
  -8   5   0   -1.35    1.22
  -8  -5   0    0.61    2.79
  -8  -5   0   -2.50    2.16
  -8   5   0    2.89    3.70
  -8  -5   0   -3.05    3.24
  -9   5   0   81.77    9.55
  -9  -5   0   84.28   10.43
  -9   5   0   90.24    5.34
   9  -5   0   92.44    8.97
  -9  -5   0   73.80    8.38
   9   5   0   95.52    7.45
  -9   5   0  101.23   10.82
  -9  -5   0   93.30    8.75
  -9  -5   0   91.32   10.60
  -9  -5   0   92.01    8.93
   9  -5   0   83.39    9.33
  -9   5   0   86.88   10.63
  -9  -5   0   83.60    8.50
   9  -5   0   85.37    9.26
  -9   5   0  111.25   11.30
  10  -5   0   96.34   10.17
 -10  -5   0  110.02   10.02
 -10   5   0  143.62   13.07
  10   5   0  101.07    7.99
 -10   5   0   98.13   10.84
  10  -5   0   99.90    9.75
  10  -5   0   99.99   10.44
 -10  -5   0  106.66   10.02
  10   5   0  103.33    9.56
 -10  -5   0  119.88   12.04
 -10  -5   0   66.39   10.37
 -10   5   0   97.00   11.32
 -10   5   0  102.79   11.94
 -10  -5   0   99.92    9.85
 -10  -5   0   83.66    8.97
  11   5   0   86.18    7.91
 -11  -5   0  114.54   12.76
 -11   5   0  103.26   12.43
  11  -5   0   94.96   10.96
 -11  -5   0  119.93   11.31
 -11  -5   0   98.19   10.60
  11   5   0  121.59    9.90
 -11  -5   0   92.00   11.61
  11  -5   0   91.33    9.52
 -11   5   0  110.62   12.81
 -11  -5   0  103.55   10.70
 -11   5   0  107.50   11.92
 -11   5   0  103.85   12.22
  11  -5   0  107.29   10.96
 -11  -5   0  134.02   10.28
 -12  -5   0   22.53    5.53
 -12   5   0   30.25    7.85
 -12  -5   0   34.70    7.15
 -12   5   0   48.12    9.43
  12   5   0   46.96    5.49
  12  -5   0   34.48    7.24
  12  -5   0   36.14    6.43
 -12   5   0   36.02    7.91
 -12  -5   0   38.16    7.47
 -12  -5   0   34.22    7.23
  12   5   0   38.13    6.39
 -12  -5   0   51.63    9.14
 -12   5   0   17.86    6.31
 -12  -5   0   23.95    6.85
  12  -5   0   35.46    7.28
 -13  -5   0   10.19    5.37
 -13   5   0   10.65    5.76
 -13   5   0    4.81    5.06
 -13  -5   0   18.43    6.34
 -13  -5   0   20.52    6.25
  13  -5   0   14.57    6.25
 -13   5   0   13.89    6.04
 -13  -5   0    3.25    5.30
  13   5   0   17.51    5.15
 -13   5   0   14.88    6.26
  13   5   0   18.70    4.48
  13  -5   0   11.89    4.92
 -13  -5   0   15.96    6.56
 -13  -5   0   12.38    4.93
  13  -5   0   14.69    6.06
  14  -5   0    1.12    4.87
 -14  -5   0    5.18    5.38
  14  -5   0    6.60    5.99
 -14  -5   0    0.53    5.21
 -14   5   0   -0.02    4.45
  14   5   0    1.26    3.68
 -14   5   0    1.10    5.30
 -14   5   0    6.81    6.72
  14  -5   0    2.09    4.20
 -14   5   0   -3.06    4.24
 -14  -5   0    0.16    4.45
 -14  -5   0    0.78    4.99
 -14  -5   0   -2.12    5.09
 -15  -5   0   13.33    7.50
  15  -5   0    7.02    5.27
 -15   5   0   13.77    7.20
 -15   5   0    9.74    6.70
  15   5   0   15.69    4.95
  15  -5   0    4.88    5.91
 -15   5   0    5.47    5.48
 -15  -5   0    3.80    6.19
 -15  -5   0    8.76    5.69
 -15  -5   0   10.02    6.26
   0   6   0   -2.78    1.91
   0  -6   0    1.21    1.64
   0  -6   0    0.93    1.69
   0  -6   0    1.13    1.91
   0  -6   0    4.69    2.74
   0   6   0    0.97    1.40
   0   6   0   -0.10    2.34
   0   6   0   -0.60    1.08
   0  -6   0    3.00    2.02
   0  -6   0    1.19    2.46
   0  -6   0    3.24    2.27
  -1   6   0  209.33   12.64
  -1   6   0  220.08   11.90
  -1  -6   0  206.35   12.56
   1  -6   0  222.37   13.27
  -1  -6   0  216.88   11.48
   1  -6   0  210.30   11.99
   1  -6   0  223.30   13.67
   1   6   0  205.56   12.37
  -1  -6   0  214.89   13.74
   1  -6   0  206.36   12.50
   1  -6   0  208.00   11.23
  -1   6   0  211.11   11.65
   1  -6   0  225.48   13.27
  -1  -6   0  211.21   12.43
  -1  -6   0  210.63   13.35
   1   6   0  226.87   14.75
  -1  -6   0  205.46   11.70
  -1   6   0  211.17   12.11
  -1  -6   0  212.07   10.53
   1  -6   0  209.84   11.96
   1   6   0  226.96   12.52
  -2   6   0   23.82    4.15
   2  -6   0   23.99    3.98
  -2  -6   0   26.41    3.20
   2  -6   0   28.48    3.86
  -2  -6   0   24.45    3.06
  -2   6   0   20.48    5.49
   2  -6   0   28.47    4.10
   2   6   0   18.96    4.68
   2  -6   0   23.21    4.70
   2  -6   0   21.91    3.28
   2  -6   0   29.00    4.93
   2  -6   0   33.40    4.80
  -2  -6   0   32.32    3.94
  -2   6   0   29.46    3.50
  -2  -6   0   30.09    5.25
   2  -6   0   28.01    4.18
  -2  -6   0   26.44    5.05
   2  -6   0   17.75    3.83
  -2   6   0   26.41    3.76
  -2  -6   0   29.94    4.51
  -2   6   0   22.51    3.42
   2   6   0   25.85    3.86
   2   6   0   29.17    4.15
  -3   6   0   81.16    9.14
   3  -6   0   98.85    8.44
  -3   6   0   90.86    6.05
  -3   6   0   96.15    6.03
   3  -6   0   83.13    6.15
   3  -6   0   90.63    7.61
   3  -6   0   87.93    8.17
   3  -6   0   86.94    7.88
   3   6   0   80.96    8.27
  -3  -6   0   83.25    5.79
   3  -6   0   87.76    7.15
  -3   6   0   88.84    7.51
   3   6   0   83.57    7.00
  -3  -6   0   92.44    7.31
  -3   6   0   91.49    7.17
  -3  -6   0   78.40    4.89
   3   6   0   87.69    6.50
  -3   6   0   73.15    6.02
  -3   6   0   89.74    7.52
  -3  -6   0   70.17    8.07
  -3   6   0   79.75    6.70
  -3  -6   0   80.38    8.43
   4  -6   0    7.79    3.16
   4   6   0    0.71    1.97
  -4  -6   0    7.45    3.35
  -4  -6   0    5.64    2.14
   4  -6   0    2.52    2.76
  -4  -6   0    6.36    2.23
   4  -6   0    2.88    2.79
  -4   6   0    6.69    3.00
  -4   6   0    5.79    3.01
  -4   6   0    7.46    1.96
   4  -6   0    8.04    3.23
  -4   6   0    4.53    1.96
  -4   6   0    5.11    2.68
   4  -6   0    2.12    2.58
  -4   6   0    3.45    3.98
  -4   6   0    2.91    2.66
   4   6   0    8.69    3.32
   4  -6   0    3.43    2.33
  -4  -6   0   -0.81    1.96
  -4  -6   0   12.26    4.18
  -4  -6   0    3.85    1.93
  -5  -6   0   -0.56    2.61
  -5  -6   0    1.16    1.75
  -5  -6   0   -6.42    2.22
  -5   6   0   -0.53    2.02
  -5   6   0   -1.65    2.27
  -5  -6   0   -0.27    1.68
   5  -6   0    0.53    2.93
   5   6   0   -0.37    2.40
  -5  -6   0    0.03    2.44
   5  -6   0    3.85    3.10
  -5  -6   0    5.89    2.33
   5  -6   0   -0.38    2.26
  -5   6   0    0.59    1.49
  -5   6   0    1.77    3.40
   5  -6   0    1.05    2.51
  -5   6   0    0.74    2.74
  -5   6   0    0.50    1.37
   5  -6   0   -1.98    2.54
   5  -6   0   -1.33    2.24
  -5   6   0    8.52    3.26
   5   6   0    1.67    2.26
  -6  -6   0  133.79   11.82
  -6   6   0  131.05   10.34
   6  -6   0  139.87   10.52
  -6  -6   0  135.24    8.72
  -6   6   0  119.40    8.44
  -6  -6   0  143.47    9.10
   6  -6   0  126.78   10.39
   6   6   0  158.17   10.80
  -6  -6   0  140.76   10.22
  -6   6   0  126.74    8.46
   6  -6   0  136.84   10.54
   6  -6   0  130.28   10.47
  -6  -6   0  128.48    8.77
  -6  -6   0  134.67   12.19
  -6   6   0  129.16   10.43
  -6   6   0  125.09   10.35
   6  -6   0  134.47    8.84
   6   6   0  111.62    9.51
   7   6   0   13.05    4.05
  -7  -6   0    3.05    3.55
  -7   6   0    9.40    4.02
  -7   6   0    9.23    4.53
  -7  -6   0   15.14    3.79
   7  -6   0    3.96    3.05
  -7   6   0    4.22    2.29
   7  -6   0    7.30    3.66
  -7  -6   0   13.25    3.70
  -7  -6   0    7.85    3.44
   7  -6   0    6.30    3.98
  -7   6   0   12.76    4.72
  -7   6   0    7.02    2.28
  -7   6   0   11.07    4.37
  -7  -6   0   14.15    4.93
  -7  -6   0   13.66    3.62
   7   6   0    2.53    2.83
   7  -6   0    7.51    3.85
  -8   6   0   40.96    7.58
  -8  -6   0   19.83    4.85
  -8   6   0   28.79    6.34
   8  -6   0   25.10    5.42
   8   6   0   27.33    5.33
   8   6   0   26.12    4.98
  -8  -6   0   29.56    5.09
  -8  -6   0   23.93    4.92
  -8   6   0   32.48    3.95
  -8   6   0   33.12    6.68
  -8   6   0   23.42    5.85
   8  -6   0   18.68    5.22
  -8  -6   0   29.58    6.99
  -8  -6   0   38.79    7.67
   8  -6   0   28.05    4.79
  -8  -6   0   30.28    5.04
   8  -6   0   17.14    5.22
   9  -6   0   97.27    9.84
  -9   6   0   99.50   11.52
   9  -6   0  100.20   10.33
  -9  -6   0  103.14    9.35
   9   6   0   89.42    8.70
  -9  -6   0   89.79    9.16
  -9  -6   0   87.58    9.25
  -9   6   0  120.24   11.88
  -9   6   0   94.90   10.69
  -9   6   0  101.76    6.68
  -9  -6   0   86.67   11.24
   9  -6   0   94.95   10.15
   9   6   0  102.14    9.66
  -9  -6   0  101.14   11.72
  -9  -6   0   94.55    9.10
  -9   6   0   99.48   11.26
 -10  -6   0   59.03    8.00
 -10   6   0   68.43   10.15
 -10   6   0   82.24   10.79
 -10  -6   0   65.45   10.16
 -10   6   0   62.27    9.55
  10  -6   0   63.39    8.87
  10  -6   0   92.33    9.34
  10  -6   0   64.08    9.17
 -10   6   0   88.74   11.40
  10   6   0   68.16    7.58
 -10   6   0   64.31    4.46
 -10  -6   0   75.49    8.53
  10   6   0   90.61    9.01
 -10  -6   0   52.39    9.68
 -10  -6   0   53.81    7.89
 -10  -6   0   76.78    8.53
 -11   6   0   51.91    9.01
  11  -6   0   36.82    7.70
  11  -6   0   54.79    8.26
 -11  -6   0   42.47    7.28
  11   6   0   25.44    5.85
 -11  -6   0   35.49    8.05
 -11  -6   0   32.30    6.68
  11   6   0   45.22    6.29
  11  -6   0   41.30    7.06
 -11  -6   0   37.50    6.85
 -11   6   0   42.93    9.07
 -11  -6   0   35.46    6.96
 -11   6   0   29.80    7.73
 -11  -6   0   38.42    8.64
 -11   6   0   48.67    9.42
 -12  -6   0   42.73    8.19
 -12  -6   0   29.30    7.86
 -12   6   0   27.26    8.14
 -12   6   0   55.37   10.17
 -12   6   0   30.87    8.79
  12  -6   0   33.25    6.88
  12   6   0   40.53    6.06
 -12  -6   0   44.37    9.31
 -12   6   0   51.96    9.56
 -12  -6   0   37.10    6.91
 -12  -6   0   50.40    8.43
 -12  -6   0   46.55    8.04
  12   6   0   41.87    6.97
  12  -6   0   23.04    6.86
  12  -6   0   29.45    7.60
  13   6   0    5.32    3.98
 -13  -6   0   -1.55    4.39
 -13   6   0   -2.40    4.28
 -13  -6   0    8.61    5.25
 -13  -6   0    8.37    6.03
 -13  -6   0    4.12    5.34
  13  -6   0    1.90    5.63
  13  -6   0    2.61    5.27
 -13   6   0   -0.38    5.20
 -13   6   0    0.50    4.42
  13  -6   0    0.34    4.36
 -13   6   0   -1.42    4.76
  13   6   0    5.15    4.29
 -13  -6   0    6.03    4.89
 -13  -6   0    3.90    4.50
 -14   6   0    0.47    4.93
 -14   6   0    2.83    5.64
  14  -6   0    0.78    5.25
 -14  -6   0    2.03    4.42
 -14  -6   0    5.13    6.39
  14  -6   0    4.90    5.11
  14   6   0    4.49    4.02
 -14   6   0   -1.58    5.88
 -14  -6   0    3.01    5.50
 -14   6   0    3.81    5.54
 -14  -6   0    4.86    5.98
 -14  -6   0   -3.07    5.43
 -15   6   0    6.45    6.27
  15   6   0    6.55    4.90
 -15   6   0    6.40    6.08
 -15   6   0    6.36    6.08
 -15  -6   0   11.49    7.67
   0  -7   0   -1.29    2.34
   0  -7   0    4.90    2.27
   0  -7   0    0.70    1.81
   0  -7   0    1.79    2.21
   0  -7   0    4.36    2.06
   0  -7   0    3.63    2.20
   0   7   0    1.61    1.75
   0  -7   0    0.25    2.23
   0  -7   0    0.26    1.97
   0   7   0    1.72    2.02
   0   7   0    3.51    3.48
   0  -7   0    2.77    2.97
   0   7   0    3.16    2.94
  -1   7   0   35.79    4.21
  -1   7   0   31.06    4.26
  -1  -7   0   34.80    3.29
  -1   7   0   32.03    4.34
  -1  -7   0   36.14    3.90
   1  -7   0   41.38    4.63
   1   7   0   34.04    4.98
   1  -7   0   37.54    4.50
  -1  -7   0   37.53    4.51
  -1   7   0   12.73    4.36
   1  -7   0   36.45    6.14
  -1  -7   0   35.35    5.16
   1  -7   0   31.96    3.86
   1  -7   0   38.61    4.52
   1   7   0   22.27    4.05
  -1  -7   0   49.13    7.19
  -1   7   0   35.87    5.34
   1   7   0   32.02    4.19
   1  -7   0   37.70    5.32
   1  -7   0   38.95    6.20
   1  -7   0   27.93    4.85
  -1  -7   0   26.02    3.57
   1  -7   0   39.00    5.02
   1   7   0   27.05    5.95
  -1  -7   0   35.76    6.21
  -1  -7   0   40.51    4.05
  -2  -7   0  313.76   15.49
   2  -7   0  283.35   17.35
   2   7   0  334.04   20.47
   2  -7   0  293.56   18.44
   2  -7   0  338.32   16.92
   2  -7   0  326.48   16.86
  -2   7   0  287.11   17.41
   2  -7   0  310.14   18.16
  -2   7   0  330.81   20.95
  -2  -7   0  311.29   15.73
  -2  -7   0  343.39   17.96
   2  -7   0  309.28   16.10
   2  -7   0  298.09   17.14
  -2  -7   0  297.96   18.84
  -2  -7   0  304.07   15.88
   2   7   0  306.77   17.61
  -2  -7   0  325.63   15.71
  -2  -7   0  281.68   18.21
  -2   7   0  319.68   16.68
   2  -7   0  298.97   18.32
  -2   7   0  311.44   16.62
   2   7   0  336.61   17.51
  -2   7   0  310.89   16.98
   2  -7   0  323.40   16.94
   3  -7   0  205.39   12.97
   3  -7   0  197.18   13.45
  -3  -7   0  208.46   10.68
  -3  -7   0  214.64   11.75
   3   7   0  209.34   13.41
  -3  -7   0  215.19   11.39
  -3   7   0  207.87   11.77
   3  -7   0  251.03   13.54
   3  -7   0  226.47   14.62
  -3   7   0  216.92   12.20
  -3   7   0  221.93   13.43
   3  -7   0  204.97   14.04
  -3  -7   0  200.82   13.25
  -3  -7   0  226.67   11.61
  -3   7   0  207.94   15.94
   3  -7   0  224.68   13.60
   3   7   0  230.49   15.55
   3  -7   0  214.61   14.08
  -3   7   0  208.88   12.41
  -3  -7   0  198.11   14.31
  -3  -7   0  215.65   14.96
   3  -7   0  211.15   12.11
  -3   7   0  202.56   12.99
   4  -7   0   24.00    5.16
   4  -7   0   27.52    5.34
  -4   7   0   19.79    6.25
  -4   7   0   31.45    3.72
  -4  -7   0   22.56    3.44
  -4   7   0   27.69    4.81
  -4   7   0   30.15    4.23
  -4   7   0   37.27    5.68
  -4  -7   0   23.01    4.60
   4  -7   0   26.94    5.59
  -4  -7   0   27.75    3.71
  -4  -7   0   26.37    3.59
   4  -7   0   20.09    3.88
   4  -7   0   36.94    5.54
   4   7   0   27.91    4.66
  -4   7   0   21.54    3.27
  -4   7   0   28.80    5.41
  -4  -7   0   19.77    5.50
  -4  -7   0   14.92    4.91
   4  -7   0   19.19    4.82
  -4   7   0   34.01    5.31
   4   7   0   30.49    6.00
   5  -7   0    6.96    3.60
   5  -7   0    6.01    3.15
  -5  -7   0    1.05    2.63
   5  -7   0    5.72    3.40
  -5  -7   0    8.04    2.56
  -5  -7   0   12.01    4.72
  -5   7   0    2.42    3.25
  -5   7   0    7.63    3.41
  -5   7   0    5.45    3.76
   5   7   0    1.15    2.38
  -5   7   0    5.97    2.16
  -5  -7   0    4.08    3.52
   5  -7   0    3.01    3.19
  -5   7   0    8.37    2.77
  -5  -7   0   12.87    3.10
  -5  -7   0    7.59    2.64
  -5   7   0    7.15    3.40
   5   7   0   10.62    4.42
   5  -7   0   10.05    4.25
   5  -7   0    5.31    3.36
   6  -7   0   30.07    4.60
   6   7   0   24.23    5.62
  -6  -7   0   26.33    6.50
   6   7   0   28.92    5.35
   6  -7   0   19.70    5.05
   6  -7   0   17.38    4.79
  -6   7   0   33.45    6.32
   6  -7   0   25.61    5.73
  -6  -7   0   18.87    3.86
  -6   7   0   39.47    6.40
   6  -7   0   29.19    6.23
  -6   7   0   27.85    5.71
   6  -7   0   22.59    5.58
  -6  -7   0   23.75    6.34
  -6   7   0   23.81    4.43
  -6  -7   0   14.42    4.46
  -6   7   0   23.11    3.89
  -7  -7   0    3.10    3.13
  -7   7   0    6.18    4.10
   7  -7   0   -2.84    3.24
  -7   7   0    7.69    4.26
  -7   7   0    6.38    2.90
   7   7   0    4.70    3.19
  -7   7   0    5.05    2.20
  -7  -7   0    6.58    3.24
  -7  -7   0    0.09    3.96
   7  -7   0    4.89    3.74
   7  -7   0    4.42    3.47
   7  -7   0    2.73    3.34
   7   7   0    2.65    3.16
   7  -7   0    5.43    4.16
  -7   7   0    4.89    3.94
  -7  -7   0    4.39    4.16
   8   7   0    8.03    3.94
  -8   7   0    3.72    4.10
   8  -7   0   -1.88    3.32
  -8   7   0    7.68    2.56
   8  -7   0    8.63    4.57
  -8  -7   0    3.30    3.71
  -8  -7   0    4.63    4.49
   8  -7   0   11.91    5.21
  -8   7   0    3.97    4.30
  -8   7   0    6.49    4.68
   8  -7   0    2.20    3.92
  -8  -7   0    4.01    4.75
   8   7   0    6.13    3.81
  -8  -7   0    3.65    3.16
   9  -7   0    6.40    4.56
  -9  -7   0    9.52    5.07
  -9   7   0    7.05    4.76
  -9  -7   0    4.92    4.91
  -9   7   0   -2.91    3.86
  -9   7   0    1.92    1.85
  -9   7   0    9.10    4.79
   9  -7   0    5.28    4.43
  -9  -7   0    3.49    3.46
   9  -7   0   -4.08    3.10
   9   7   0    4.24    4.13
   9   7   0    3.55    3.95
 -10  -7   0   16.44    5.46
  10  -7   0   23.99    6.02
  10  -7   0   23.85    6.50
 -10   7   0   12.36    5.67
 -10   7   0   16.68    3.01
 -10  -7   0   16.49    6.77
 -10   7   0   17.95    6.13
  10   7   0   19.32    5.41
  10  -7   0   19.98    6.01
 -10  -7   0    8.23    6.05
  10   7   0   20.42    5.46
 -10   7   0   10.61    5.51
 -10   7   0   22.13    7.21
  11  -7   0   -1.54    3.44
 -11  -7   0    3.72    4.82
 -11   7   0   -1.16    3.89
  11   7   0    1.37    3.79
  11   7   0   -0.37    3.18
 -11  -7   0   -2.45    4.33
 -11   7   0   -2.09    4.62
 -11  -7   0    1.67    4.37
 -11   7   0    1.43    4.74
  11  -7   0    2.91    4.87
  11  -7   0   -0.74    4.29
 -11   7   0   -3.64    4.71
  12  -7   0   34.85    8.58
 -12  -7   0   23.50    8.00
 -12   7   0   25.89    7.74
  12   7   0   36.01    7.06
  12  -7   0   28.81    7.11
  12   7   0   25.18    5.89
 -12   7   0   34.27    8.61
 -12   7   0   17.31    6.65
 -12  -7   0   40.20    7.75
 -12   7   0   41.16    8.91
 -12  -7   0   18.18    7.19
  12  -7   0   22.88    7.36
  13   7   0   -1.53    4.40
 -13   7   0    4.45    6.64
 -13   7   0    0.80    5.31
  13  -7   0    3.50    5.16
 -13  -7   0   -1.13    5.18
 -13   7   0   -6.72    4.54
  13   7   0    2.88    4.72
  13  -7   0    1.00    4.94
 -13   7   0    1.82    5.08
 -13  -7   0    2.14    5.89
 -13  -7   0   -2.17    3.92
 -14  -7   0    6.00    6.24
 -14   7   0    0.73    5.86
 -14   7   0    4.03    5.99
  14  -7   0    6.77    5.81
  14   7   0    9.08    5.42
  14   7   0   -0.17    4.72
 -14   7   0    5.78    6.54
  14  -7   0   27.57    8.30
 -14  -7   0    5.04    5.03
   0   8   0  333.29   19.02
   0   8   0  332.21   22.09
   0  -8   0  331.47   16.47
   0  -8   0  327.18   17.41
   0  -8   0  315.96   19.62
   0  -8   0  308.93   20.01
   0  -8   0  308.40   17.94
   0   8   0  359.96   18.11
   0  -8   0  336.12   18.39
   0   8   0  334.30   18.59
   1   8   0    7.40    3.25
   1  -8   0    9.16    4.32
   1  -8   0    8.31    3.32
   1  -8   0    7.98    4.01
   1  -8   0   10.06    3.44
  -1  -8   0    7.56    2.20
   1   8   0    3.89    3.85
  -1  -8   0    9.62    2.70
   1  -8   0   14.93    3.69
  -1   8   0    9.26    4.25
  -1  -8   0    6.61    3.36
   1  -8   0   13.09    3.17
  -1  -8   0    8.12    4.23
  -1  -8   0    7.21    2.73
  -1  -8   0    5.56    4.36
   1  -8   0   11.48    3.57
   1   8   0   12.42    4.11
  -1   8   0   13.72    3.31
   1  -8   0    9.93    3.15
  -1   8   0    7.71    4.47
  -1   8   0   10.20    3.32
   2  -8   0    8.01    3.41
  -2   8   0    0.11    3.21
   2  -8   0    9.39    3.05
  -2  -8   0    5.09    2.30
   2  -8   0    2.35    3.53
   2   8   0    3.05    2.75
  -2  -8   0    5.48    2.32
   2   8   0   -2.79    3.23
  -2  -8   0   -1.57    3.02
   2  -8   0    7.04    4.27
   2   8   0   11.10    4.22
  -2   8   0    7.26    2.51
  -2   8   0    3.35    2.33
  -2  -8   0    3.61    3.05
  -2   8   0    6.35    3.83
   2  -8   0    5.32    3.06
  -2  -8   0    4.46    3.68
   2  -8   0    7.85    3.21
   2  -8   0    1.13    2.63
  -3  -8   0    5.26    2.33
  -3   8   0    8.02    3.62
   3  -8   0    1.42    2.83
  -3   8   0    2.75    2.26
   3  -8   0    3.49    3.58
  -3   8   0    5.97    2.69
   3  -8   0   11.57    3.97
   3  -8   0   -1.21    3.29
   3  -8   0    2.23    2.68
   3   8   0    7.95    4.79
  -3  -8   0    2.85    3.32
   3  -8   0    2.42    3.13
  -3  -8   0   -0.50    2.88
  -3  -8   0   -2.04    3.54
   3  -8   0   -1.01    3.38
  -3   8   0    3.55    2.38
   3   8   0    3.26    2.55
  -3   8   0   12.04    5.20
  -3  -8   0    4.62    1.82
   3  -8   0    3.63    3.32
  -3   8   0    4.38    3.63
   4  -8   0   45.78    7.16
  -4   8   0   44.87    4.99
  -4  -8   0   38.84    6.47
  -4   8   0   46.91    6.56
   4   8   0   56.97    6.97
   4  -8   0   44.24    5.46
  -4   8   0   60.02    7.09
   4   8   0   42.88    7.91
   4  -8   0   63.49    8.34
   4  -8   0   55.84    6.96
   4  -8   0   48.54    7.66
  -4   8   0   50.52    5.92
  -4   8   0   51.75    5.14
   4  -8   0   48.85    7.15
  -4  -8   0   48.57    8.22
  -4  -8   0   50.59    8.35
  -5   8   0   26.32    5.68
  -5  -8   0   29.32    7.20
   5  -8   0   18.12    4.36
  -5  -8   0   20.55    5.31
   5   8   0   24.21    6.17
  -5   8   0   16.89    4.74
  -5   8   0   22.16    4.36
   5  -8   0   23.68    5.82
   5  -8   0   18.48    5.42
   5   8   0   19.54    4.83
  -5   8   0   27.00    5.83
   5  -8   0   24.01    5.84
   5  -8   0   33.71    6.60
  -5  -8   0   29.47    7.28
   5  -8   0   13.79    4.65
  -5   8   0   27.12    5.79
   6  -8   0    2.27    3.99
   6   8   0    4.88    4.65
   6  -8   0    1.19    3.25
   6   8   0    3.13    3.00
   6  -8   0   10.31    4.53
  -6  -8   0    2.67    4.19
  -6   8   0    8.28    3.78
  -6  -8   0    2.96    4.56
  -6   8   0    7.96    4.44
  -6  -8   0    2.89    3.41
  -6   8   0    7.25    4.17
   6  -8   0    0.12    3.25
  -6   8   0    5.88    2.50
   6  -8   0   -0.87    3.47
  -6   8   0    4.81    4.12
   6  -8   0    6.14    3.48
  -7   8   0  106.47   10.79
   7  -8   0   74.38    7.99
  -7  -8   0   75.44   10.70
   7  -8   0  100.29   10.91
  -7   8   0  106.28    8.23
  -7   8   0  100.28   10.58
  -7  -8   0  116.79   12.77
  -7   8   0   96.68   10.50
  -7   8   0   89.46    7.97
   7   8   0  110.09   10.29
   7  -8   0  101.87   10.79
   7   8   0  126.50   11.78
   7  -8   0   70.82    9.34
   7  -8   0   83.67   10.20
  -7  -8   0   88.11   10.00
   8  -8   0   10.29    5.30
   8  -8   0    4.44    4.67
  -8   8   0   20.83    6.14
   8  -8   0   14.62    5.81
  -8   8   0   18.42    3.77
   8  -8   0   16.22    4.66
  -8   8   0   14.24    3.41
  -8  -8   0   17.87    5.18
   8   8   0   16.07    4.86
  -8  -8   0   16.91    6.54
   8  -8   0   13.67    5.44
  -8   8   0   20.06    5.93
  -8  -8   0   16.13    6.41
  -8   8   0   17.73    5.57
   8   8   0    8.05    4.80
  -9  -8   0   -0.58    4.18
  -9  -8   0    5.09    5.02
   9   8   0    6.83    4.16
  -9  -8   0    9.07    4.76
  -9   8   0    4.78    4.84
   9  -8   0   13.05    5.95
   9  -8   0    4.72    4.78
   9   8   0    5.15    4.28
  -9   8   0    3.59    2.39
   9  -8   0    7.31    5.25
   9  -8   0    0.59    3.98
  -9   8   0    9.31    5.27
  -9   8   0    0.81    4.13
 -10  -8   0   10.10    5.09
 -10   8   0   18.84    6.70
  10   8   0   12.90    5.33
 -10   8   0   12.76    6.14
  10   8   0    6.58    5.42
  10  -8   0   24.73    7.29
  10  -8   0   12.01    5.87
 -10   8   0   14.95    6.21
 -10   8   0   15.20    3.42
 -10  -8   0   11.44    6.51
  10  -8   0   11.14    6.30
 -10  -8   0   12.19    6.40
  10  -8   0    6.84    5.09
  11   8   0   25.71    6.76
 -11   8   0   24.37    7.27
  11   8   0   18.06    6.08
 -11  -8   0   24.22    7.82
 -11   8   0   14.91    3.04
  11  -8   0   30.57    7.96
 -11  -8   0   16.68    7.64
 -11   8   0    9.74    5.92
  11  -8   0   26.08    7.32
 -11   8   0   23.45    7.59
  11  -8   0   24.70    8.25
 -11  -8   0   24.87    6.45
  11  -8   0   27.79    7.56
 -12   8   0    4.82    5.67
  12   8   0    2.30    5.39
 -12  -8   0   12.53    7.03
  12  -8   0    6.38    5.65
 -12   8   0    3.11    5.72
  12   8   0    0.22    4.41
  12  -8   0    1.21    5.47
 -12  -8   0    4.89    6.49
  12  -8   0    3.52    5.71
 -12   8   0    3.42    5.60
 -12  -8   0    0.50    4.24
  13  -8   0   -4.47    5.25
 -13   8   0   10.56    7.06
 -13   8   0    5.63    7.05
  13   8   0    3.01    4.96
  13  -8   0    5.98    6.76
 -13  -8   0    3.90    6.48
 -13   8   0    2.70    6.47
  13   8   0   -1.82    5.42
 -13  -8   0    1.03    4.74
   0   9   0   -1.16    3.40
   0   9   0    0.26    2.08
   0  -9   0   -1.08    2.22
   0  -9   0   -1.91    2.36
   0  -9   0   -3.35    2.85
   0  -9   0    0.38    3.88
   0  -9   0    1.49    3.68
   0   9   0   -1.22    4.19
   1  -9   0   11.62    3.29
   1   9   0   19.93    4.59
   1  -9   0   22.31    6.14
   1   9   0   10.21    5.32
  -1  -9   0   20.77    6.31
  -1   9   0   25.94    4.78
   1  -9   0   20.31    4.66
   1   9   0   14.11    4.97
  -1   9   0   21.99    4.30
  -1  -9   0   14.80    2.75
  -1  -9   0   14.83    4.24
   1  -9   0   17.20    5.79
  -1   9   0   18.72    6.87
  -1  -9   0   14.76    5.52
  -1   9   0   18.59    5.26
   1  -9   0   11.02    4.26
  -1  -9   0   12.98    3.62
  -2   9   0    4.85    2.81
   2  -9   0    3.10    3.05
  -2  -9   0    1.48    4.06
  -2   9   0    8.12    2.95
   2  -9   0   -1.95    3.76
   2   9   0    1.68    4.49
   2  -9   0    9.30    4.35
  -2   9   0    5.31    4.16
  -2  -9   0    3.16    2.19
   2  -9   0    4.29    3.59
  -2   9   0    5.95    3.01
   2   9   0    4.19    2.97
  -2   9   0    0.07    4.69
  -2  -9   0    6.11    3.70
  -2  -9   0   -1.56    2.93
   3  -9   0    2.65    4.10
  -3   9   0    2.77    2.01
  -3  -9   0    0.46    1.57
  -3  -9   0    0.63    3.20
  -3  -9   0   -2.49    3.69
  -3   9   0    3.44    2.69
   3   9   0   -1.86    4.03
   3  -9   0   -4.36    2.59
  -3   9   0   -0.55    2.29
   3   9   0    1.31    2.67
   3  -9   0   -3.31    2.58
   3  -9   0   -2.36    3.08
   3  -9   0    6.90    4.49
  -3   9   0   -2.87    3.55
  -3  -9   0    5.68    4.32
   4  -9   0    1.44    3.39
   4   9   0    3.08    4.51
   4  -9   0    1.82    3.70
   4  -9   0    2.81    3.73
   4  -9   0   -2.53    3.06
   4  -9   0    5.57    4.14
  -4  -9   0    3.20    3.76
  -4   9   0    1.37    2.15
   4  -9   0   -2.24    4.18
   4  -9   0   -5.16    2.82
  -4  -9   0   -0.40    4.19
   4   9   0   -1.25    2.75
  -4  -9   0   -0.33    3.41
  -4   9   0   -2.74    3.45
   5  -9   0    0.14    3.33
   5  -9   0    5.43    3.67
   5  -9   0    2.24    3.88
   5  -9   0    1.20    4.42
  -5   9   0   -0.21    3.48
  -5  -9   0   -2.59    4.38
   5   9   0   -1.81    2.91
   5   9   0    0.63    4.52
   5  -9   0   -1.43    3.78
  -5   9   0    1.40    2.37
  -5   9   0   -3.19    3.27
   5  -9   0    3.53    4.15
  -5  -9   0    5.40    3.92
  -5  -9   0    1.34    3.95
   5  -9   0   11.62    4.84
  -6   9   0   -5.95    3.03
   6  -9   0   -3.01    3.42
   6  -9   0    0.09    4.34
  -6  -9   0    4.44    4.70
  -6   9   0   -2.23    4.20
  -6   9   0    5.18    4.38
   6  -9   0    7.00    3.91
  -6  -9   0   -4.13    3.24
   6  -9   0   -1.27    3.70
  -6  -9   0   -1.58    4.03
   6  -9   0    7.86    4.80
   6   9   0    0.12    2.86
   6   9   0    6.33    4.87
  -6   9   0    0.00    1.85
  -6   9   0   -5.09    3.22
  -7  -9   0    2.51    3.91
   7  -9   0    1.28    4.90
   7   9   0    2.66    4.69
   7   9   0    4.63    3.73
   7  -9   0    6.99    4.87
   7  -9   0    4.14    4.70
  -7   9   0    0.54    4.05
  -7   9   0    1.85    3.41
  -7   9   0    1.24    4.27
  -7   9   0    0.74    4.00
  -7   9   0   -2.05    1.72
  -7  -9   0   10.61    5.83
   7  -9   0   -2.12    3.49
  -7  -9   0    2.20    4.45
  -8   9   0    8.31    3.18
   8  -9   0    6.86    5.41
  -8  -9   0   -0.84    3.74
   8   9   0    3.87    5.01
  -8   9   0    6.74    3.43
   8  -9   0   12.44    4.79
  -8   9   0   12.81    5.74
   8  -9   0    8.66    5.46
  -8   9   0   14.14    5.95
   8  -9   0   10.97    5.34
  -8  -9   0    1.24    4.75
  -8   9   0    2.84    4.84
   8   9   0    2.77    4.27
  -8  -9   0   22.44    7.18
   9  -9   0   -0.97    4.35
  -9  -9   0    6.80    4.70
  -9   9   0   10.48    5.75
  -9  -9   0   -1.85    4.86
   9  -9   0   15.73    6.50
   9   9   0    5.12    4.49
   9  -9   0    2.58    5.03
   9  -9   0   -0.74    4.27
   9   9   0    7.75    5.50
   9  -9   0    0.34    4.84
  -9  -9   0   -0.90    5.15
  -9   9   0    6.60    2.87
  -9   9   0    8.98    5.14
  -9   9   0   11.85    5.89
 -10   9   0    2.10    5.36
 -10  -9   0    1.54    5.92
 -10  -9   0   -3.76    5.03
  10   9   0   -1.28    4.38
  10  -9   0   -3.33    5.33
  10   9   0    1.56    4.52
 -10   9   0    2.87    5.64
  10  -9   0   -1.20    5.06
  10  -9   0   -6.09    4.15
 -10  -9   0    2.60    4.33
 -10   9   0    7.31    5.83
 -10   9   0   -1.77    2.08
  10  -9   0    5.03    6.18
  11   9   0   15.98    6.85
 -11  -9   0   12.98    7.51
 -11   9   0    0.08    5.16
 -11   9   0    9.81    3.20
 -11   9   0   21.80    7.42
 -11  -9   0   10.61    5.75
 -11   9   0    5.14    5.68
  11  -9   0   12.18    7.61
  11   9   0   15.91    6.16
  11  -9   0   10.15    7.00
  11  -9   0   23.66    7.57
  11  -9   0   16.68    7.13
 -12  -9   0   13.63    7.53
 -12  -9   0    2.24    5.45
 -12   9   0    9.48    6.48
  12  -9   0    0.26    5.92
  12  -9   0   14.75    7.15
  12  -9   0   10.12    7.16
 -12   9   0   -0.50    5.17
 -12   9   0    3.72    6.30
   0 -10   0    1.60    2.50
   0 -10   0   -6.03    3.38
   0  10   0   -0.59    2.33
   0 -10   0    2.50    2.72
   0 -10   0    2.01    3.56
   0 -10   0   -1.34    4.38
   0  10   0    0.40    4.29
   0  10   0    9.20    6.00
   1 -10   0   80.66    8.67
  -1 -10   0   88.74   11.18
   1 -10   0   82.54   10.89
  -1 -10   0   73.32    8.95
   1 -10   0   73.92    6.50
  -1 -10   0   75.88   10.47
  -1  10   0   68.52    7.36
   1 -10   0   86.02   10.69
  -1  10   0   45.34   10.29
   1  10   0   87.37    9.69
  -1 -10   0   61.96    6.90
  -1  10   0   78.94    9.70
   1  10   0   78.70   11.94
   1  10   0   73.57    8.07
  -1 -10   0   70.02    5.02
  -2  10   0    7.24    3.49
  -2 -10   0    5.74    2.80
  -2  10   0   11.39    3.73
  -2  10   0   14.03    4.19
   2 -10   0   12.83    4.47
   2 -10   0   11.22    5.46
  -2  10   0   12.58    5.73
   2  10   0   10.23    4.00
  -2 -10   0   10.67    6.02
   2 -10   0    8.91    5.47
  -2 -10   0    9.64    5.66
  -2 -10   0   12.58    4.67
   2  10   0    5.71    5.75
   2 -10   0    5.21    3.38
   3  10   0   -1.64    2.56
  -3  10   0   -4.97    3.88
   3 -10   0    6.23    3.48
  -3  10   0    0.21    2.58
  -3 -10   0   -0.72    4.66
   3 -10   0   12.66    5.63
   3  10   0    1.79    5.12
  -3 -10   0   -0.57    3.49
   3 -10   0    5.42    4.25
  -3  10   0    0.40    2.64
  -3 -10   0   -0.54    1.79
   3 -10   0    0.89    4.91
  -3 -10   0   -0.44    4.28
  -3  10   0    4.00    2.82
   4 -10   0    7.08    4.57
  -4 -10   0   15.09    6.27
  -4  10   0   13.06    4.19
  -4  10   0   12.49    5.41
   4  10   0   12.92    4.41
   4 -10   0   11.26    4.40
   4 -10   0    9.71    5.62
   4 -10   0    4.86    4.78
  -4 -10   0    9.71    4.91
  -4 -10   0    9.07    5.96
   4  10   0    7.21    5.91
  -5 -10   0    1.43    5.14
   5  10   0   15.20    6.48
   5 -10   0   13.50    6.33
   5  10   0    2.19    3.55
   5 -10   0    3.96    4.14
  -5 -10   0    5.89    4.32
  -5  10   0   13.83    5.28
   5 -10   0   -0.39    4.29
   5 -10   0   11.05    5.43
  -5  10   0    4.79    3.10
  -5 -10   0   18.27    6.74
   6 -10   0    0.12    4.96
  -6 -10   0    6.98    4.43
  -6  10   0    4.57    4.36
   6 -10   0    3.62    5.04
   6 -10   0    7.50    4.44
  -6 -10   0    8.59    6.06
   6  10   0    5.51    4.37
  -6  10   0   -0.67    2.21
   6  10   0   -0.30    5.02
   6 -10   0    1.67    4.29
  -6 -10   0    7.80    5.73
   7 -10   0    3.72    5.57
  -7 -10   0   34.07    8.32
   7 -10   0   11.06    6.19
  -7 -10   0    7.27    6.02
   7  10   0    7.36    6.18
   7 -10   0   11.86    4.99
  -7  10   0   11.42    5.11
  -7 -10   0    5.96    4.84
   7  10   0    7.70    5.03
  -7  10   0   17.17    4.47
  -8 -10   0   24.65    7.54
  -8 -10   0   18.76    7.71
  -8  10   0   14.17    6.64
  -8 -10   0   11.23    5.39
   8 -10   0   28.05    7.80
   8 -10   0   23.60    7.51
  -8  10   0   21.15    5.24
   8  10   0   32.93    7.62
   8  10   0   28.62    8.31
   8 -10   0   10.99    5.54
  -8  10   0   24.53    4.94
   9  10   0   34.99    8.94
  -9 -10   0   16.65    5.85
  -9  10   0   22.79    7.71
  -9 -10   0   16.33    7.51
   9  10   0   16.19    6.62
   9 -10   0   22.73    7.82
  -9  10   0   14.43    4.32
  -9 -10   0   12.29    7.15
   9 -10   0   21.53    7.75
   9 -10   0   12.99    5.63
  10 -10   0   -5.02    5.45
 -10  10   0    1.42    2.77
 -10 -10   0   -1.53    4.26
  10  10   0    1.91    6.28
 -10  10   0   -5.14    5.76
  10 -10   0   -2.26    5.14
 -10 -10   0    3.13    6.34
 -10  10   0   13.10    6.35
  10 -10   0    7.84    6.62
 -10  10   0    8.22    5.85
 -11 -10   0   -1.02    4.49
  11 -10   0   -1.85    5.92
 -11  10   0   -2.63    2.39
 -11  10   0   -2.14    5.73
 -11 -10   0    0.79    6.21
 -11  10   0    0.25    5.05
 -11  10   0    1.74    5.90
   0 -11   0    1.01    2.70
   0 -11   0    0.89    2.89
   0  11   0    2.75    6.22
   0  11   0    3.13    2.89
   0 -11   0    5.84    5.03
   0 -11   0    4.08    5.37
   0  11   0    2.50    5.61
  -1  11   0    0.77    3.37
   1  11   0    0.57    3.17
  -1 -11   0    0.07    4.08
   1 -11   0    0.01    3.17
   1  11   0   -1.31    5.90
   1  11   0   -0.56    5.52
  -1 -11   0    1.92    5.30
  -1  11   0    1.27    3.03
   1 -11   0    6.22    3.30
   1 -11   0   12.54    6.30
   1 -11   0    2.74    5.16
  -1 -11   0    1.78    2.82
  -1 -11   0   15.88    7.06
  -1  11   0   -0.96    5.34
   2 -11   0    2.22    3.60
  -2  11   0    2.44    3.14
   2 -11   0    0.39    4.77
  -2 -11   0    6.52    4.60
   2  11   0    7.68    4.01
  -2 -11   0    6.63    5.71
  -2  11   0    1.17    3.42
  -2  11   0    5.28    3.71
  -2  11   0    7.41    5.65
  -2 -11   0    5.55    5.30
   2 -11   0    3.42    5.35
   2  11   0   -2.48    5.47
   2 -11   0    3.58    3.79
  -2 -11   0    4.01    2.85
   3  11   0   31.33    9.38
  -3 -11   0   24.09    7.46
  -3 -11   0   11.53    5.28
  -3  11   0   15.20    6.41
   3  11   0   17.27    5.23
   3 -11   0   16.39    7.03
  -3  11   0   20.74    5.41
   3 -11   0   18.64    7.14
  -3 -11   0   21.26    7.96
  -3 -11   0   12.49    2.76
   3 -11   0   16.86    4.46
   3 -11   0   14.13    4.98
  -4 -11   0   22.30    7.87
   4 -11   0   25.60    7.84
   4 -11   0   25.70    7.61
  -4 -11   0   32.46    8.54
  -4  11   0   33.04    7.79
   4 -11   0   23.49    6.43
   4  11   0   22.70    6.19
  -4 -11   0   27.70    6.68
  -4  11   0   33.63    6.34
   4  11   0   22.05    8.08
   4 -11   0   27.72    5.20
  -5 -11   0   37.59    9.44
  -5 -11   0   17.20    7.28
   5 -11   0   26.28    7.11
  -5  11   0   31.87    7.58
   5 -11   0   67.70   10.78
  -5 -11   0   11.13    5.63
   5 -11   0   33.03    6.16
  -5  11   0   34.80    6.52
   5  11   0   25.56    8.52
   5  11   0   36.68    7.71
   5 -11   0   47.49    9.49
   6 -11   0    3.01    4.50
   6 -11   0   -2.83    5.39
   6 -11   0   -0.10    4.94
   6  11   0    1.89    6.53
  -6 -11   0    1.88    5.74
  -6 -11   0    8.28    6.59
  -6  11   0   -3.62    4.64
   6  11   0    9.74    5.10
  -6 -11   0   -0.01    4.50
   6 -11   0    1.50    5.80
  -6  11   0    0.88    3.03
   7  11   0   16.00    6.08
  -7 -11   0   13.38    6.83
   7 -11   0   15.71    6.64
   7  11   0   22.28    8.47
  -7 -11   0   15.54    5.87
   7 -11   0    6.18    6.46
  -7 -11   0   13.08    7.20
  -7  11   0    7.83    3.86
   7 -11   0   10.52    6.79
   7 -11   0   21.51    5.98
  -7  11   0   12.82    5.53
   8 -11   0   11.07    5.43
   8 -11   0    4.02    6.99
   8 -11   0   15.32    8.01
   8  11   0    9.17    7.71
  -8 -11   0   10.84    5.79
  -8 -11   0   10.34    7.19
  -8  11   0    6.30    4.62
  -8  11   0   10.29    4.06
  -9 -11   0    0.06    4.72
   9 -11   0    8.64    5.90
  -9 -11   0   -0.39    6.14
  -9  11   0    7.55    3.59
   9 -11   0    0.29    5.91
   9 -11   0   -7.35    5.89
   0 -12   0    3.77    5.64
   0 -12   0    3.97    3.61
   0  12   0    5.31    3.88
   0 -12   0    0.03    5.48
   0  12   0    7.99    4.20
   0  12   0    0.47    6.64
  -1 -12   0    4.31    3.37
   1  12   0    6.66    4.02
  -1  12   0    4.24    6.59
   1 -12   0   11.79    7.27
  -1  12   0   11.83    4.32
   1 -12   0   12.62    6.77
   1  12   0    5.03    4.42
  -1 -12   0   -1.16    5.57
  -1 -12   0   16.29    7.50
   1 -12   0    3.66    3.45
   1 -12   0    8.64    4.64
  -1  12   0    5.69    4.09
  -2 -12   0   24.97    4.30
   2 -12   0   35.66    8.85
   2  12   0   26.91    6.13
  -2  12   0   10.50    6.90
   2 -12   0    8.13    4.55
   2  12   0   17.77    8.61
   2 -12   0   18.61    4.65
   2 -12   0   14.87    7.28
  -2 -12   0   22.23    7.99
  -2 -12   0   19.93    7.47
  -3 -12   0   18.98    6.45
  -3  12   0    2.31    6.37
  -3  12   0   12.09    4.61
   3 -12   0    8.07    4.68
   3  12   0   10.94    8.54
  -3 -12   0   -0.05    5.63
   3 -12   0   -2.51    5.77
  -3 -12   0    7.04    7.00
   3 -12   0   10.92    4.58
  -3 -12   0   11.86    2.62
   3 -12   0    4.84    6.30
   3  12   0    6.54    4.41
   4 -12   0    5.86    4.46
   4  12   0    2.84    6.85
   4 -12   0   20.41    6.42
   4 -12   0   13.18    7.30
  -4  12   0   11.02    5.15
   4 -12   0   15.11    7.26
  -4 -12   0   10.83    7.59
  -4 -12   0    9.55    6.75
   4  12   0    4.53    4.32
  -4  12   0    5.95    5.94
  -4 -12   0    2.59    5.40
   5  12   0    4.96    7.92
   5 -12   0    3.43    6.14
  -5  12   0   -0.63    3.64
  -5  12   0    1.13    5.42
  -5 -12   0    6.86    5.49
   5 -12   0    5.38    5.16
   5 -12   0   -0.75    6.19
  -5 -12   0    7.00    7.20
   5 -12   0    9.83    4.68
   6 -12   0    8.74    6.38
   6 -12   0    2.02    6.15
   6 -12   0   13.34    5.37
   6 -12   0   12.08    7.31
  -6 -12   0    0.96    6.16
  -6  12   0   -4.12    3.01
  -6  12   0   -3.26    4.99
   6  12   0    7.15    7.62
  -6 -12   0   -4.32    4.40
  -7  12   0    5.65    4.25
   7 -12   0    4.27    5.40
   7 -12   0    2.80    6.79
  -7  12   0    6.94    5.90
   7 -12   0   -0.29    5.35
  -7 -12   0    8.77    7.27
   7 -12   0   -1.18    7.02
  -7 -12   0    1.24    5.09
   7  12   0   -4.62    7.29
   0 -13   0    4.57    6.40
   0  13   0    8.47    8.04
   0  13   0   -1.25    3.56
   0 -13   0    0.35    3.16
   0  13   0    2.54    4.00
  -1  13   0    1.77    6.93
   1 -13   0    5.66    6.53
   1 -13   0   -0.49    3.69
   1  13   0    0.26    3.76
   1  13   0    4.80    4.41
  -1  13   0    0.18    4.47
  -1 -13   0   -0.11    2.97
  -1 -13   0   -4.31    5.60
  -2 -13   0    1.22    2.55
   2  13   0    2.50    4.10
  -2  13   0    8.55    7.62
   2 -13   0    1.71    4.09
   2 -13   0    6.95    7.34
   2 -13   0   -4.07    3.50
  -2 -13   0    1.71    6.41
  -3 -13   0   16.33    8.64
   3 -13   0   -0.01    6.68
   3 -13   0    4.26    4.99
  -3  13   0   16.16    5.68
  -3  13   0   16.44    8.00
   3 -13   0   14.58    5.12
   3  13   0   11.71   10.08
 -17   0   1   -1.06    5.71
 -17   0   1   -2.05    5.52
 -17   0   1    6.05    6.12
 -17   0   1    2.98    6.25
 -16   0   1    2.21    5.11
 -16   0   1   -0.93    4.91
  16   0  -1   -1.00    3.75
 -16   0   1    9.79    6.28
 -16   0   1    4.70    5.94
  16   0  -1    8.22    6.27
 -16   0   1   -6.57    4.57
 -15   0   1    0.88    5.11
 -15   0   1   11.40    5.58
 -15   0   1    1.08    4.68
 -15   0   1   -2.95    4.50
  15   0  -1   -2.83    4.69
 -15   0   1    4.16    4.95
  15   0  -1    1.41    3.33
 -14   0   1   10.84    5.36
 -14   0   1   -0.17    4.14
  14   0  -1    6.09    5.28
 -14   0   1    2.57    4.52
 -14   0   1   -1.03    4.37
  14   0  -1    3.91    3.20
 -14   0   1    7.64    5.19
 -13   0   1    0.32    3.68
 -13   0   1   -0.67    3.73
  13   0  -1    0.35    4.22
 -13   0   1    3.45    4.42
 -13   0   1    3.13    4.21
 -13   0   1   -2.61    3.80
  13   0  -1    1.21    2.78
  12   0  -1    5.01    4.42
  12   0  -1    1.52    2.59
 -12   0   1    6.78    4.16
 -12   0   1    1.35    4.11
 -12   0   1   -2.49    2.96
 -12   0   1   -0.68    3.41
 -12   0   1    4.72    4.11
 -11   0   1   -3.44    2.52
 -11   0   1    0.73    3.10
  11   0  -1    3.58    2.36
 -11   0   1    3.57    3.28
 -11   0   1   -1.61    2.86
 -11   0   1    4.42    3.67
  11   0  -1    1.66    3.24
 -10   0   1   -1.35    2.45
 -10   0   1   -0.45    2.66
  10   0  -1    0.40    1.76
  10   0  -1   -3.70    2.62
 -10   0   1    6.49    3.55
 -10   0   1    4.24    3.36
  10   0  -1    1.91    1.88
 -10   0   1   -4.14    2.25
  -9   0   1    2.36    2.85
   9   0  -1    0.26    2.05
   9   0  -1   -1.56    2.20
   9   0  -1    1.13    1.38
   9   0  -1    0.52    1.42
  -9   0   1    2.52    2.23
  -9   0   1    3.88    2.58
  -9   0   1    2.43    2.35
  -9   0   1   -1.21    1.94
  -8   0   1    2.13    2.13
  -8   0   1    1.50    2.21
  -8   0   1   -0.09    2.13
  -8   0   1    1.70    2.02
   8   0  -1    0.56    1.79
  -8   0   1   -2.64    1.90
   8   0  -1    0.15    1.08
   8   0  -1    2.10    1.46
  -7   0   1    0.31    1.75
  -7   0   1    0.49    1.96
  -7   0   1   -1.93    1.83
  -7   0   1    0.65    1.87
  -7   0   1   -1.56    1.61
   7   0  -1    0.00    0.92
  -7   0   1    0.01    1.95
   7   0  -1    0.70    1.64
   7   0  -1    0.21    1.04
  -6   0   1   -0.56    1.33
   6   0  -1    0.14    0.89
  -6   0   1   -0.16    1.33
   6   0  -1   -0.08    0.85
  -6   0   1    1.39    1.57
   6   0  -1    1.66    1.44
  -6   0   1    0.37    1.89
  -6   0   1    1.06    1.86
  -6   0   1   -0.40    1.46
  -5   0   1   -0.51    1.20
  -5   0   1   -0.66    0.90
   5   0  -1    2.17    0.96
  -5   0   1   -2.15    1.22
   5   0  -1    0.15    0.69
   5   0  -1   -1.10    0.98
   4   0  -1    0.85    0.63
   4   0  -1    0.12    0.68
   4   0  -1    0.37    0.87
  -4   0   1    0.85    1.19
  -4   0   1    0.54    1.05
  -3   0   1    0.94    0.88
   3   0  -1    0.47    0.67
   3   0  -1    0.34    0.79
  -3   0   1   -0.71    1.07
   3   0  -1    1.51    0.64
  -2   0   1   -0.18    0.51
   2   0  -1    0.56    0.68
  -2   0   1    0.54    0.66
   2   0  -1    0.20    0.33
  -2   0   1    0.77    0.41
   2   0  -1   -0.16    0.47
   2   0  -1    0.54    0.41
  -2   0   1    0.73    0.87
   1   0  -1   -0.03    0.18
  -1   0   1    0.61    0.47
  -1   0   1   -0.06    0.20
   1   0  -1   -0.27    0.18
  -1   0   1   -0.19    0.16
   1   0  -1    0.03    0.24
   1   0  -1   -0.08    0.33
  -1   0   1   -0.14    0.24
   1   0  -1    0.08    0.30
  -1   0   1   -0.02    0.26
   1   0  -1    0.27    0.24
   0   0  -1   -0.69    0.19
   0   0   1   -0.75    0.25
   0   0   1   -0.76    0.26
   0   0  -1   -0.66    0.26
   0   0   1   -0.76    0.17
   0   0  -1   -0.28    0.35
   0   0  -1   -0.70    0.26
   0   0   1   -0.37    0.31
  -1   0  -1    0.64    0.53
  -1   0  -1   -0.04    0.61
  -1   0  -1    0.59    0.73
   1   0   1   -0.81    0.46
   1   0   1   -0.20    0.47
   1   0   1   -1.63    0.45
  -2   0  -1    2.03    0.91
  -2   0  -1    0.10    0.86
   2   0   1    1.35    0.92
   2   0   1    1.13    0.85
  -2   0  -1   -0.42    0.66
  -3   0  -1    2.63    1.14
  -3   0  -1    0.89    1.07
  -3   0  -1    1.20    1.44
  -4   0  -1    0.71    1.23
  -4   0  -1   -0.10    0.91
  -4   0  -1    1.09    1.35
  -4   0  -1   -1.14    1.10
  -5   0  -1    0.03    1.73
  -5   0  -1   -0.48    1.66
  -5   0  -1    0.95    1.62
  -5   0  -1    0.48    1.14
  -5   0  -1    0.49    1.78
  -5   0  -1    1.50    1.64
  -6   0  -1    2.11    2.15
  -6   0  -1    2.65    1.48
   6   0   1    0.26    0.84
  -6   0  -1    1.57    2.04
  -6   0  -1   -1.56    1.49
  -6   0  -1    3.12    2.32
  -6   0  -1    1.13    2.13
   6   0   1   -0.01    0.84
  -6   0  -1    0.18    1.86
  -7   0  -1   -0.09    1.97
  -7   0  -1   -1.06    1.73
  -7   0  -1    1.82    2.41
   7   0   1    0.04    1.08
   7   0   1   -1.13    0.93
  -7   0  -1    1.06    1.39
  -7   0  -1    0.75    2.25
  -7   0  -1    4.94    2.60
  -7   0  -1    1.21    1.91
  -8   0  -1   -0.35    2.24
   8   0   1   -0.30    1.12
  -8   0  -1    0.88    2.25
  -8   0  -1   -1.30    2.32
  -8   0  -1    0.43    2.33
  -8   0  -1    3.88    2.62
  -8   0  -1   -0.33    2.45
  -8   0  -1    1.37    1.63
   8   0   1    0.54    1.42
   9   0   1   -0.10    1.44
  -9   0  -1   -0.34    2.60
  -9   0  -1    2.29    2.91
  -9   0  -1   -1.18    2.54
  -9   0  -1   -1.88    2.53
   9   0   1    2.43    2.04
  -9   0  -1    1.28    1.97
  -9   0  -1    1.10    1.87
  -9   0  -1    0.79    2.69
  10   0   1    2.66    3.42
 -10   0  -1    5.27    4.01
 -10   0  -1    3.29    3.44
 -10   0  -1    0.47    2.84
 -10   0  -1    1.14    3.15
 -10   0  -1   -3.05    2.67
  10   0   1    5.19    2.12
 -10   0  -1   -1.16    2.08
 -11   0  -1    0.76    3.70
 -11   0  -1   -3.32    3.33
 -11   0  -1   -1.65    3.37
 -11   0  -1   -0.46    3.54
  11   0   1    2.10    2.19
  11   0   1    6.65    4.29
 -11   0  -1   -2.17    3.04
 -12   0  -1    8.17    4.29
  12   0   1   -4.69    3.29
 -12   0  -1    4.77    4.22
 -12   0  -1   -4.63    3.51
 -12   0  -1    2.40    4.15
  12   0   1    0.30    2.20
 -12   0  -1    0.67    3.92
 -13   0  -1   -1.35    4.07
  13   0   1    1.16    4.29
 -13   0  -1   -0.91    3.68
 -13   0  -1    2.46    4.72
 -13   0  -1    0.75    4.13
 -13   0  -1    1.95    3.89
  13   0   1   -0.60    2.44
 -14   0  -1    3.49    5.27
  14   0   1    4.44    3.06
 -14   0  -1   -2.07    4.40
 -14   0  -1   -2.26    4.69
 -14   0  -1   -1.82    4.51
 -14   0  -1   -1.94    4.36
  14   0   1    5.45    5.61
 -15   0  -1   -0.09    5.18
 -15   0  -1    6.43    5.57
  15   0   1   10.78    6.74
  15   0   1   -1.51    3.15
 -15   0  -1    2.29    5.49
 -15   0  -1   -4.23    4.41
 -15   0  -1    3.22    5.12
 -16   0  -1    2.10    5.24
  16   0   1   -0.38    3.50
 -16   0  -1    3.74    5.49
 -16   0  -1    1.23    6.00
  16   0   1    7.15    6.41
 -16   0  -1    0.39    5.78
 -17  -1   1   21.16    7.78
 -17   1   1   21.95    7.79
  17  -1  -1   47.64   10.43
 -17  -1   1   34.45    9.37
 -17  -1   1   15.56    7.82
 -17  -1   1   20.61    7.74
 -17   1   1   21.20    8.06
 -17   1   1   25.89    8.41
 -16   1   1    5.30    5.70
 -16  -1   1   15.94    6.91
 -16   1   1    3.87    5.60
 -16  -1   1    5.26    6.09
 -16   1   1   11.70    6.18
 -16  -1   1   10.70    6.09
  16  -1  -1    9.08    4.35
 -16   1   1    4.31    5.61
  16  -1  -1   12.48    6.25
 -16  -1   1    3.87    6.09
  16   1  -1   23.13    7.75
  16   1  -1    6.29    4.12
 -16  -1   1   15.67    6.55
 -16   1   1    5.75    5.95
 -15   1   1    6.59    5.37
 -15  -1   1   -4.59    3.68
  15   1  -1    1.10    4.85
 -15  -1   1    4.10    5.00
  15  -1  -1    2.44    5.28
 -15   1   1    0.73    5.14
  15   1  -1    3.77    3.51
  15  -1  -1    1.39    3.41
 -15  -1   1   10.54    6.37
 -15   1   1    1.65    4.46
 -15   1   1    3.99    5.45
 -15  -1   1    3.64    5.37
 -15   1   1    1.51    4.82
 -15  -1   1    8.52    5.08
 -14  -1   1   31.80    7.97
  14  -1  -1   32.58    5.57
 -14   1   1   23.26    6.88
 -14  -1   1   47.03    8.65
 -14  -1   1   46.73    9.13
 -14   1   1   27.87    7.26
  14   1  -1   39.47    5.44
 -14  -1   1   49.50    8.95
 -14  -1   1   37.41    8.05
 -14   1   1   27.66    7.78
  14   1  -1   34.70    7.89
 -14   1   1   37.35    8.26
 -14   1   1   33.65    8.01
  14  -1  -1   32.71    7.46
 -13  -1   1    3.30    3.99
  13   1  -1    4.78    4.88
  13  -1  -1    4.47    3.10
 -13  -1   1   10.62    4.91
 -13   1   1    5.69    4.90
 -13   1   1   -0.63    3.92
 -13  -1   1   11.89    5.17
 -13  -1   1   14.78    5.30
  13  -1  -1    6.46    4.67
 -13   1   1    4.16    4.61
 -13   1   1    1.88    3.81
 -13   1   1    5.68    4.73
  13   1  -1    9.81    3.38
 -13  -1   1    1.01    4.57
 -12   1   1   38.86    7.71
 -12   1   1   42.90    7.97
 -12   1   1   46.38    8.08
 -12  -1   1   52.53    8.22
 -12  -1   1   32.83    6.94
 -12  -1   1   33.53    6.79
 -12   1   1   53.29    8.36
 -12  -1   1   38.46    7.29
  12  -1  -1   39.03    5.16
 -12  -1   1   56.36    8.56
  12  -1  -1   41.38    7.69
 -12   1   1   57.49    8.40
  12   1  -1   40.17    4.83
 -11   1   1   92.98    9.84
 -11  -1   1  109.64   10.65
 -11  -1   1  118.89   10.36
 -11   1   1   85.83   10.40
 -11  -1   1  101.29   10.73
 -11  -1   1   86.69    9.85
  11  -1  -1  118.14   10.91
  11  -1  -1   90.66    7.35
 -11   1   1   89.84   10.43
 -11  -1   1   83.80    9.76
 -11   1   1   95.51   10.14
  11   1  -1   90.06    6.87
 -11  -1   1   97.23   10.27
 -11   1   1   96.11   10.50
  10   1  -1   85.80    6.39
  10  -1  -1   98.98    9.59
 -10  -1   1   97.71    9.04
 -10  -1   1   93.57    9.57
 -10  -1   1   93.84    9.40
 -10  -1   1  100.46    6.70
 -10  -1   1   70.53    8.66
 -10   1   1  106.07    9.55
  10   1  -1   91.51    6.20
 -10   1   1   87.61    9.75
 -10   1   1   71.64    8.53
 -10  -1   1   72.89    9.10
  10  -1  -1   86.81    6.76
 -10  -1   1   68.03    8.49
 -10   1   1   79.23    9.31
 -10   1   1   71.17    8.91
  -9  -1   1  297.82   17.58
   9  -1  -1  326.93   17.26
  -9   1   1  319.63   17.90
  -9   1   1  283.29   17.57
   9  -1  -1  302.08   15.78
   9   1  -1  308.60   15.32
  -9  -1   1  293.28   14.82
   9  -1  -1  284.91   17.49
   9   1  -1  301.77   15.09
  -9  -1   1  259.11   16.72
   9   1  -1  279.87   15.62
  -9  -1   1  284.75   17.02
  -9  -1   1  282.94   17.75
  -9   1   1  302.66   17.21
  -9   1   1  292.19   18.12
  -9  -1   1  272.23   17.32
  -9   1   1  259.98   17.11
   9  -1  -1  293.10   13.99
  -9  -1   1  269.85   17.00
   8  -1  -1  357.52   20.17
  -8   1   1  361.59   19.60
  -8  -1   1  336.60   19.55
   8   1  -1  388.47   18.31
   8   1  -1  369.39   18.03
  -8  -1   1  347.06   19.88
   8  -1  -1  369.32   16.99
   8  -1  -1  364.39   19.68
  -8   1   1  337.59   20.44
  -8  -1   1  349.15   19.57
  -8   1   1  360.90   20.26
  -8   1   1  356.70   20.03
  -8  -1   1  389.05   19.97
  -8   1   1  372.89   20.18
  -8  -1   1  354.38   20.37
   8   1  -1  367.52   18.49
   8  -1  -1  382.63   18.80
  -8  -1   1  379.86   20.52
  -7  -1   1  145.17    9.20
   7   1  -1  134.29    8.00
  -7  -1   1  134.84    9.55
  -7  -1   1  147.62   10.07
  -7   1   1  119.51    9.36
   7  -1  -1  144.98    8.25
  -7   1   1  134.55    9.30
   7  -1  -1  136.81    6.90
   7   1  -1  128.69    7.50
   7  -1  -1  136.70    8.97
  -7   1   1  134.24    9.77
   7   1  -1  153.60    8.22
   7  -1  -1  155.34   10.02
  -7  -1   1  134.72    9.25
  -7  -1   1  134.03    9.60
  -7   1   1  135.79    9.60
  -7  -1   1  123.42    9.02
  -7   1   1  144.51    9.47
  -6   1   1   57.74    5.61
  -6  -1   1   67.47    6.32
   6  -1  -1   57.83    3.55
  -6  -1   1   54.33    5.31
  -6  -1   1   53.26    4.83
  -6   1   1   56.41    5.27
  -6  -1   1   57.13    5.46
  -6  -1   1   56.51    5.80
  -6   1   1   63.44    5.98
   6  -1  -1   60.31    5.82
   6   1  -1   59.91    3.73
  -6   1   1   65.12    6.01
   6  -1  -1   52.25    3.12
   6  -1  -1   44.67    3.91
  -6   1   1   58.58    5.87
   6  -1  -1   58.23    5.12
  -6  -1   1   51.97    5.36
   6   1  -1   45.82    3.91
   6   1  -1   54.55    4.01
   5   1  -1  159.65    8.32
  -5  -1   1  172.22    9.67
   5   1  -1  167.51    8.64
   5   1  -1  170.71    8.69
  -5  -1   1  176.84    9.23
  -5  -1   1  167.82   10.13
  -5   1   1  160.46    9.44
   5  -1  -1  152.24    7.50
   5  -1  -1  164.42    7.79
   5  -1  -1  157.69    9.51
   5  -1  -1  152.38    8.75
   5  -1  -1  163.20    9.69
  -5   1   1  173.16   10.08
   4   1  -1   78.74    4.86
   4   1  -1   80.21    4.78
   4   1  -1   76.06    4.55
   4  -1  -1   81.71    5.01
  -4   1   1   84.69    5.39
   4  -1  -1   79.26    5.56
  -4   1   1   81.01    5.74
  -4  -1   1   79.73    5.82
  -4   1   1   96.35    5.58
   4  -1  -1   84.24    5.73
  -4  -1   1   81.43    5.44
  -4   1   1   89.35    4.14
   3  -1  -1  594.56   25.37
   3  -1  -1  586.44   26.54
  -3   1   1  575.88   26.95
   3  -1  -1  593.49   27.11
   3   1  -1  566.57   26.73
  -3   1   1  608.70   27.58
  -3  -1   1  572.23   26.56
   3   1  -1  586.55   26.87
  -3  -1   1  585.04   26.83
   3   1  -1  588.89   26.34
  -3   1   1  567.76   25.14
   3  -1  -1  546.85   27.55
  -2   1   1 3281.41  140.21
   2   1  -1 3007.44  135.98
   2  -1  -1 3098.71  133.29
   2  -1  -1 3140.60  140.15
  -2  -1   1 3067.64  135.49
   2  -1  -1 3127.48  133.09
  -2   1   1 3147.94  135.80
   2  -1  -1 2927.58  139.57
   2   1  -1 3208.60  139.72
  -2   1   1 3098.47  137.15
  -2   1   1 3122.89  133.59
  -2  -1   1 3076.11  133.26
   2   1  -1 3051.06  139.67
  -2  -1   1 3258.33  139.66
   2  -1  -1 3209.03  137.27
   1  -1  -1 1876.37   80.18
   1  -1  -1 1860.32   80.14
  -1  -1   1 1655.94   80.03
  -1  -1   1 2151.80   84.30
  -1   1   1 1663.63   81.49
   1   1  -1 1953.20   84.34
  -1   1   1 1900.99   80.47
  -1  -1   1 2040.07   81.66
   1   1  -1 1833.53   81.86
   1  -1  -1 1584.96   81.79
   1   1  -1 1950.02   81.61
   1   1  -1 1723.15   84.10
   1   1  -1 1899.73   80.26
  -1  -1   1 1952.25   81.85
   1   1  -1 1578.66   79.94
  -1  -1   1 2065.95   80.25
  -1   1   1 1898.83   80.10
   0  -1   1   61.60    4.28
   0   1   1   75.36    4.54
   0   1  -1   72.30    4.36
   0  -1   1   61.96    4.12
   0   1  -1   67.29    4.52
   0   1   1   84.08    4.77
   0  -1  -1   85.59    4.43
   0  -1   1   69.77    4.53
   0   1  -1   71.74    4.82
   0   1  -1   63.55    4.25
   0  -1  -1   57.54    4.46
   0  -1  -1   86.76    3.96
   0  -1  -1   69.69    4.49
   0   1   1   79.68    4.69
   1   1   1    1.72    0.82
  -1  -1  -1    2.69    0.71
  -1  -1  -1    2.33    0.83
  -1   1  -1    2.78    0.74
  -1   1  -1    2.83    0.58
  -1   1  -1    2.04    0.55
   1  -1   1    2.36    0.91
  -1  -1  -1    2.14    0.88
   1  -1   1    0.84    0.59
   1  -1   1    0.99    0.81
   1  -1   1    3.22    0.73
   1  -1   1    1.20    0.69
  -1   1  -1    2.37    0.60
   1  -1   1    1.62    0.57
  -1   1  -1    3.82    1.09
   1   1   1    1.76    0.59
   2  -1   1   37.56    2.74
  -2  -1  -1   41.51    2.94
  -2   1  -1   44.00    2.76
  -2   1  -1   44.14    2.93
   2  -1   1   37.52    2.97
   2  -1   1   42.29    2.80
  -2   1  -1   27.00    2.46
  -2   1  -1   37.94    3.23
  -2  -1  -1   39.52    3.14
   2  -1   1   36.53    2.55
  -2  -1  -1   37.51    3.07
  -3  -1  -1  172.26    9.32
  -3   1  -1  174.42    9.93
   3  -1   1  166.97    9.21
   3  -1   1  175.19    9.06
  -3  -1  -1  178.84    9.61
  -3   1  -1  190.98    8.90
   3  -1   1  164.84    8.91
  -3  -1  -1  179.76    9.49
   3  -1   1  173.20    8.75
  -3   1  -1  176.93    9.86
  -4   1  -1  962.67   43.44
  -4   1  -1  939.93   41.75
  -4  -1  -1  935.10   42.22
  -4   1  -1 1009.58   43.49
   4  -1   1  903.57   41.60
  -4  -1  -1  931.32   42.76
   4  -1   1  850.66   42.61
  -4  -1  -1  972.68   42.99
  -4  -1  -1  940.03   42.39
   4  -1   1  901.38   43.04
  -5  -1  -1  727.26   33.89
  -5   1  -1  717.09   33.16
  -5  -1  -1  742.44   34.33
  -5   1  -1  748.87   35.19
   5  -1   1  687.99   33.58
   5  -1   1  701.89   33.92
  -5  -1  -1  739.74   34.74
  -5   1  -1  740.70   35.27
   5  -1   1  686.70   34.25
  -5  -1  -1  764.92   34.84
  -5   1  -1  781.64   34.37
  -5   1  -1  750.81   34.68
  -6  -1  -1  211.19   12.33
  -6   1  -1  202.97   10.63
  -6   1  -1  198.29   11.65
  -6   1  -1  215.07   13.06
  -6  -1  -1  215.49   12.60
  -6  -1  -1  206.14   12.20
   6  -1   1  205.01   11.98
  -6  -1  -1  222.75   12.68
  -6  -1  -1  187.60   12.23
  -6  -1  -1  216.01   11.48
   6  -1   1  194.93   11.20
  -6   1  -1  203.44   12.71
   6  -1   1  202.87   10.84
  -6   1  -1  194.36   12.49
  -6   1  -1  212.93   12.92
  -6  -1  -1  218.89   12.36
  -7   1  -1   98.82    6.16
  -7  -1  -1  101.85    8.05
  -7   1  -1   90.93    8.89
   7  -1   1  102.57    7.82
  -7   1  -1  102.79    8.35
  -7  -1  -1   95.68    6.59
   7  -1   1  101.94    6.41
  -7  -1  -1  105.84    8.38
  -7  -1  -1   95.57    8.39
  -7  -1  -1  108.92    8.21
   7  -1   1   92.10    6.74
  -7  -1  -1  105.84    8.11
  -7  -1  -1   98.85    7.95
  -7   1  -1  114.50    8.82
  -7   1  -1  108.42    9.35
  -7   1  -1   97.13    7.56
  -7  -1  -1   96.82    6.79
  -8  -1  -1   81.78    6.29
  -8   1  -1   82.30    8.44
   8  -1   1   76.95    5.73
  -8  -1  -1   84.88    6.22
  -8   1  -1   84.79    5.67
  -8  -1  -1   77.45    8.31
   8  -1   1   84.62    6.48
  -8  -1  -1   95.65    8.45
  -8  -1  -1   88.40    8.43
   8  -1   1   80.24    7.87
  -8  -1  -1   91.56    8.59
  -8   1  -1   97.73    9.26
  -8  -1  -1   77.45    8.05
  -8   1  -1   79.92    8.62
  -8   1  -1   93.36    7.93
  -8   1  -1   77.39    8.53
  -8  -1  -1  114.14    9.12
  -9  -1  -1    3.64    2.96
  -9  -1  -1   -0.03    2.66
  -9   1  -1    3.21    2.90
   9   1   1    1.20    1.36
  -9   1  -1    4.01    2.89
   9   1   1    2.93    1.17
   9  -1   1   -0.13    2.37
   9  -1   1    3.07    1.91
  -9   1  -1   -1.83    2.36
  -9   1  -1    1.41    2.97
   9  -1   1    1.46    2.65
  -9  -1  -1    1.95    2.56
  -9   1  -1    1.19    1.71
  -9  -1  -1    0.12    2.98
  -9  -1  -1    0.20    2.15
  -9   1  -1    2.35    2.99
  -9  -1  -1    2.05    2.74
  -9  -1  -1    4.10    2.97
  -9  -1  -1    0.46    1.91
 -10  -1  -1   93.17   10.02
 -10  -1  -1   99.67   10.29
 -10   1  -1   86.36    9.76
 -10   1  -1   89.83   10.30
 -10   1  -1   86.65   10.08
  10   1   1   97.17    5.71
 -10  -1  -1   88.85    9.86
  10   1   1   91.35    6.12
 -10  -1  -1   80.78    6.93
 -10  -1  -1   88.72    6.90
 -10   1  -1   87.17    8.79
  10  -1   1   88.77    6.74
 -10   1  -1  105.70   10.61
 -10  -1  -1  105.78   10.10
 -10  -1  -1   86.31    9.39
 -10  -1  -1   91.93    9.75
  10  -1   1   82.50    9.12
  11  -1   1   84.64    9.52
 -11   1  -1   73.69    9.60
  11   1   1   82.95    5.49
 -11   1  -1   72.47    9.77
 -11  -1  -1   78.68    9.99
 -11  -1  -1   80.99    9.99
  11  -1   1   77.16    6.64
 -11   1  -1   60.54    9.39
 -11   1  -1   78.88   10.22
 -11  -1  -1   63.58    9.33
 -11  -1  -1   81.99    9.72
 -11  -1  -1   83.01    9.64
 -11  -1  -1   98.35   10.15
 -11   1  -1   79.71    9.19
 -12  -1  -1   13.88    5.35
  12  -1   1   13.76    5.42
 -12  -1  -1    9.64    5.19
 -12   1  -1    4.74    4.18
 -12  -1  -1    0.01    3.75
 -12  -1  -1   12.72    5.20
 -12   1  -1    6.45    4.39
 -12  -1  -1    6.65    4.61
 -12   1  -1    8.00    4.97
 -12   1  -1    6.70    4.57
 -12   1  -1    5.17    4.61
 -12  -1  -1   10.56    4.55
  12   1   1    8.84    2.59
  12  -1   1    9.67    3.20
 -13  -1  -1   -1.81    4.12
 -13  -1  -1    2.95    4.52
 -13  -1  -1    1.13    3.97
 -13  -1  -1    4.11    4.34
  13  -1   1   -0.06    4.07
 -13   1  -1    1.49    4.36
 -13   1  -1    5.08    4.69
  13  -1   1    3.96    3.15
 -13   1  -1    5.53    4.92
  13   1   1    3.65    2.41
 -13   1  -1    8.52    5.12
 -13  -1  -1    3.75    4.16
 -13   1  -1   -0.03    4.04
 -14   1  -1   22.87    7.21
 -14  -1  -1   24.28    7.44
  14   1   1   25.52    4.20
 -14   1  -1   20.21    6.64
  14  -1   1   14.46    4.40
 -14  -1  -1   24.11    7.17
 -14   1  -1   36.25    8.26
  14  -1   1   27.20    7.06
 -14  -1  -1   34.53    8.11
 -14  -1  -1   40.94    9.18
 -14   1  -1   16.53    6.48
  14   1   1   36.66    7.99
 -14  -1  -1   25.28    7.44
 -14   1  -1   17.51    6.29
  15   1   1   27.72    4.68
 -15  -1  -1   32.08    8.27
  15   1   1   23.06    7.65
 -15   1  -1   19.36    7.77
 -15  -1  -1   16.91    6.83
 -15  -1  -1   13.35    7.04
 -15   1  -1   21.01    8.20
 -15  -1  -1   25.44    7.63
 -15  -1  -1   26.92    8.07
 -15   1  -1   21.00    7.47
 -15   1  -1   18.25    7.16
 -15   1  -1   16.44    6.63
  15  -1   1   21.16    5.10
  15  -1   1   21.95    7.20
 -16   1  -1   23.75    8.33
 -16   1  -1   11.00    6.49
 -16   1  -1   18.39    6.54
 -16  -1  -1   21.67    7.85
  16  -1   1   21.90    5.58
 -16   1  -1   11.04    6.75
  16   1   1   21.81    5.03
  16   1   1   18.26    7.97
 -16  -1  -1   26.07    8.83
 -16  -1  -1   11.68    7.31
 -16  -1  -1   17.84    7.56
 -17  -2   1    7.13    6.87
 -17   2   1    1.12    5.80
 -17  -2   1   -0.90    5.81
 -17   2   1    2.03    6.00
 -17   2   1    0.13    5.85
  17  -2  -1    4.87    7.00
 -17  -2   1   -1.37    5.39
  16   2  -1    9.57    4.35
 -16  -2   1    5.19    6.81
  16  -2  -1    2.81    4.44
  16  -2  -1   23.85    7.61
 -16   2   1   13.47    6.69
 -16   2   1    3.65    5.32
 -16   2   1    0.59    5.41
 -16  -2   1   -0.40    5.77
 -16  -2   1    9.59    6.24
 -16  -2   1   -0.77    5.46
 -16  -2   1    7.31    5.75
  16  -2  -1   -1.57    5.22
  16   2  -1   -3.20    5.33
 -15   2   1   34.66    8.38
 -15  -2   1   35.98    8.36
 -15  -2   1   24.70    7.70
 -15   2   1   20.15    7.23
 -15  -2   1   38.40    8.51
 -15   2   1   43.24    9.42
 -15  -2   1   26.95    8.01
 -15  -2   1   27.98    8.28
  15   2  -1   35.75    5.63
  15  -2  -1   22.11    5.62
  15  -2  -1   45.62    9.53
 -15   2   1   27.64    8.10
 -14  -2   1   15.56    5.63
  14  -2  -1    4.42    4.88
 -14   2   1    3.52    4.65
 -14  -2   1    7.71    5.11
  14   2  -1   13.59    3.74
  14  -2  -1    7.10    3.79
 -14   2   1    7.68    5.01
 -14   2   1   11.21    5.43
 -14  -2   1   22.91    7.27
 -14  -2   1   10.63    5.60
 -14   2   1   14.01    6.09
 -14  -2   1    4.26    4.44
 -14  -2   1    2.79    4.60
 -13  -2   1   -1.36    3.49
 -13  -2   1   -3.47    3.35
 -13  -2   1   -1.00    3.29
 -13   2   1    0.70    3.74
 -13  -2   1    0.46    3.73
  13  -2  -1   -3.04    2.51
 -13  -2   1   -1.68    4.17
 -13   2   1   -2.69    3.44
 -13   2   1    0.53    4.05
  13  -2  -1    2.97    4.18
  13   2  -1   -0.33    2.26
 -13   2   1    4.06    4.25
 -13  -2   1    2.85    4.62
 -12   2   1    2.15    3.63
 -12  -2   1    5.37    3.87
 -12  -2   1    6.16    5.02
 -12   2   1   13.26    5.10
  12  -2  -1    3.30    2.74
 -12  -2   1    5.82    4.21
 -12  -2   1    4.75    4.52
 -12   2   1    1.61    3.84
  12  -2  -1    4.73    3.90
 -12  -2   1    2.62    3.60
  12   2  -1    3.47    2.39
 -12  -2   1    3.20    4.09
 -12   2   1   -3.65    3.49
 -11  -2   1   12.03    3.53
 -11   2   1   11.41    5.04
  11  -2  -1   15.89    3.65
 -11   2   1   10.25    4.27
 -11  -2   1   14.28    5.02
  11  -2  -1   16.17    5.21
 -11  -2   1   13.24    5.30
 -11  -2   1   13.83    5.26
 -11   2   1   12.31    4.94
 -11  -2   1   11.66    4.52
  11   2  -1   12.38    2.87
  11   2  -1   10.78    3.39
 -11   2   1    8.43    4.39
 -11  -2   1   12.89    4.65
 -11  -2   1    2.83    3.73
 -10  -2   1   43.94    6.67
 -10  -2   1   39.89    4.93
 -10   2   1   44.23    7.27
 -10  -2   1   41.82    6.81
  10  -2  -1   29.59    4.67
 -10  -2   1   52.26    7.68
  10   2  -1   40.89    4.17
 -10   2   1   34.62    6.40
 -10   2   1   54.83    7.85
 -10  -2   1   42.71    7.32
  10   2  -1   47.16    4.95
 -10   2   1   42.50    7.28
 -10  -2   1   48.24    6.42
  10  -2  -1   37.66    6.70
 -10  -2   1   43.54    6.62
  -9  -2   1    9.21    2.65
  -9   2   1   11.35    4.00
   9   2  -1   10.44    2.22
  -9  -2   1    8.86    3.59
   9  -2  -1   13.55    3.94
   9   2  -1    9.22    2.58
  -9  -2   1    8.43    3.15
  -9   2   1   16.69    4.15
  -9  -2   1   11.65    3.71
  -9   2   1   13.41    4.05
  -9   2   1   12.99    4.05
  -9  -2   1    7.29    3.35
  -9  -2   1    6.22    3.61
   9   2  -1   12.65    2.85
  -9  -2   1   11.91    4.13
   9  -2  -1    7.05    2.41
   8   2  -1  139.13    8.12
  -8   2   1  131.37   10.18
  -8   2   1  106.79    9.11
  -8  -2   1  118.81   10.65
   8   2  -1  151.92    8.68
  -8   2   1  116.80    9.77
  -8  -2   1  121.80    9.02
   8  -2  -1  137.69    8.69
  -8  -2   1  121.24    9.22
  -8  -2   1  131.93   10.13
   8   2  -1  133.52    7.64
   8  -2  -1  120.42    9.58
  -8  -2   1  134.89    9.50
  -8   2   1  121.80   10.21
  -8  -2   1  143.75    9.94
   8  -2  -1  142.15   10.10
  -8  -2   1  133.03    8.31
   7   2  -1    8.81    2.35
  -7  -2   1    6.93    2.36
   7  -2  -1    6.74    2.13
   7  -2  -1   11.94    3.43
   7   2  -1   10.79    1.95
  -7   2   1   10.28    3.23
  -7  -2   1   17.10    3.25
  -7   2   1   12.58    3.67
  -7  -2   1   14.40    3.43
  -7   2   1    8.93    2.81
  -7  -2   1   14.02    3.29
   7  -2  -1   15.29    3.89
  -7   2   1   12.85    3.52
  -7  -2   1    7.35    2.83
  -7  -2   1   11.41    3.64
  -7  -2   1   19.17    4.40
   7   2  -1   10.20    2.09
   7  -2  -1    8.55    1.77
   6  -2  -1  152.77    9.81
   6   2  -1  141.10    8.15
   6  -2  -1  167.81    7.95
   6  -2  -1  146.46    9.85
  -6   2   1  161.39   10.22
  -6   2   1  132.39    9.83
   6   2  -1  157.49    8.45
  -6  -2   1  166.03    9.76
  -6   2   1  166.67    7.29
  -6  -2   1  174.16    9.56
   6  -2  -1  149.57    9.06
  -6  -2   1  151.98   10.19
  -6  -2   1  159.39    9.39
   6   2  -1  148.19    8.95
   6  -2  -1  140.88   10.03
  -6  -2   1  132.75   10.06
  -6   2   1  142.82    9.61
  -6   2   1  157.29   10.48
  -6  -2   1  137.98    8.91
  -5  -2   1  700.83   32.40
  -5  -2   1  682.67   31.61
  -5   2   1  665.20   31.33
   5   2  -1  610.43   31.11
  -5   2   1  703.01   28.92
  -5   2   1  664.94   31.74
  -5  -2   1  686.46   31.55
   5   2  -1  673.39   31.24
   5   2  -1  673.82   31.27
  -5   2   1  644.70   31.83
   5  -2  -1  661.63   33.14
  -5   2   1  683.98   32.60
   5  -2  -1  672.19   32.04
  -5   2   1  674.79   32.53
   5  -2  -1  669.28   31.57
   5  -2  -1  677.66   29.74
   4  -2  -1   70.98    5.58
  -4   2   1   74.04    5.35
   4  -2  -1   66.57    5.14
  -4   2   1   59.60    4.60
   4   2  -1   62.71    4.13
  -4   2   1   63.28    3.72
  -4  -2   1   70.56    5.55
  -4  -2   1   66.25    4.61
   4  -2  -1   61.79    3.88
  -4   2   1   68.56    5.32
  -4   2   1   61.65    3.54
  -4   2   1   61.34    3.79
   4   2  -1   62.26    4.49
   4  -2  -1   59.65    4.55
   4   2  -1   64.88    4.18
   3  -2  -1   84.21    5.91
  -3   2   1   92.24    5.37
   3   2  -1   89.89    5.61
  -3   2   1   99.97    6.18
   3   2  -1   90.55    5.48
  -3   2   1  103.66    5.86
  -3  -2   1   95.31    6.40
  -3   2   1   94.20    4.70
  -3   2   1   95.04    5.05
  -3   2   1  100.78    6.54
   3  -2  -1   90.64    5.70
  -3  -2   1  106.61    5.73
   3  -2  -1   94.50    5.13
   3   2  -1   83.28    5.49
   2  -2  -1 1133.85   51.86
  -2   2   1 1196.39   52.46
  -2   2   1 1217.62   54.75
  -2  -2   1 1233.02   53.66
  -2   2   1 1174.05   52.01
  -2   2   1 1119.96   51.53
   2   2  -1 1136.09   53.75
   2   2  -1 1160.78   52.54
  -2  -2   1 1194.21   52.15
   2  -2  -1 1201.28   51.84
  -2  -2   1 1224.54   52.15
   2   2  -1 1146.58   54.03
   2  -2  -1 1160.12   51.11
   2   2  -1 1225.44   50.89
   1  -2  -1 2325.09  106.23
  -1   2   1 2281.77  101.70
   1   2  -1 2399.76  106.41
  -1   2   1 2367.02  102.95
   1   2  -1 2327.25  106.79
  -1  -2   1 2347.99  101.13
   1  -2  -1 2325.19  103.34
  -1  -2   1 2479.60  103.07
   1  -2  -1 2327.68  102.85
   1   2  -1 2394.54  101.46
   1  -2  -1 2358.16  101.41
  -1  -2   1 2463.68  106.33
  -1  -2   1 2413.78  101.48
   1  -2  -1 2238.76  101.21
   1   2  -1 2401.59  103.52
   0   2   1   36.10    2.73
   0  -2   1   32.42    2.88
   0  -2  -1   35.63    2.04
   0  -2  -1   39.21    3.19
   0   2  -1   42.30    2.91
   0  -2   1   38.03    2.53
   0   2   1   33.93    3.26
   0   2   1   36.38    2.57
   0   2  -1   39.46    2.76
   0  -2  -1   35.58    2.88
   0  -2   1   34.46    2.82
   0  -2   1   36.37    2.98
   0   2   1   36.73    2.10
   0  -2  -1   39.24    2.29
   0  -2  -1   35.45    2.63
   1  -2   1 1436.58   62.87
  -1  -2  -1 1570.00   65.61
  -1  -2  -1 1468.95   63.40
  -1  -2  -1 1510.99   63.52
   1   2   1 1457.75   66.15
   1   2   1 1387.68   63.37
   1  -2   1 1435.71   62.82
   1   2   1 1372.24   65.55
  -1   2  -1 1418.82   63.15
  -1   2  -1 1495.02   66.84
  -1   2  -1 1481.41   64.08
   1  -2   1 1494.77   64.61
  -1  -2  -1 1403.85   64.63
  -2  -2  -1  177.83    9.71
  -2   2  -1  159.67    8.45
   2  -2   1  177.39    9.52
  -2   2  -1  181.67   10.03
   2  -2   1  179.97    9.05
  -2   2  -1  173.87    9.75
   2   2   1  180.17    8.80
   2  -2   1  183.27    8.59
  -2   2  -1  172.51    8.63
   2  -2   1  163.20    9.94
  -2  -2  -1  173.52    9.48
  -2   2  -1  190.45    8.57
   2   2   1  164.04    8.44
  -2  -2  -1  191.21    8.79
  -3  -2  -1   31.39    3.78
  -3   2  -1   33.85    2.41
   3  -2   1   26.69    2.37
  -3  -2  -1   34.12    3.08
  -3   2  -1   33.06    3.56
  -3   2  -1   31.71    3.60
   3  -2   1   25.29    2.92
  -3  -2  -1   29.99    3.23
   3  -2   1   36.78    3.26
  -3   2  -1   34.51    4.05
  -3   2  -1   38.32    2.65
   3  -2   1   26.65    3.48
   4  -2   1  480.21   23.99
  -4  -2  -1  488.81   23.83
   4  -2   1  486.92   24.75
  -4   2  -1  508.94   22.77
  -4  -2  -1  509.72   23.81
   4  -2   1  502.86   23.38
  -4   2  -1  500.93   21.19
  -4   2  -1  508.27   24.87
  -4   2  -1  488.89   24.59
  -4  -2  -1  461.71   24.05
  -5   2  -1  719.79   34.39
  -5  -2  -1  714.58   33.28
  -5  -2  -1  713.04   33.02
  -5  -2  -1  701.61   33.26
  -5  -2  -1  696.19   32.70
  -5  -2  -1  718.19   31.85
  -5   2  -1  675.74   33.98
   5  -2   1  690.82   32.49
  -5   2  -1  701.23   31.72
  -5   2  -1  713.43   33.19
   5  -2   1  681.52   33.27
  -5  -2  -1  688.44   33.42
   5  -2   1  709.44   34.21
  -5   2  -1  668.66   33.44
   6  -2   1    1.82    1.85
   6  -2   1    8.92    2.86
  -6   2  -1    4.91    2.68
  -6   2  -1    5.03    2.78
  -6  -2  -1   -1.30    1.71
   6  -2   1    1.11    1.42
  -6   2  -1    1.57    2.30
  -6  -2  -1    3.72    2.65
  -6   2  -1    3.57    1.38
  -6  -2  -1    3.14    2.09
  -6   2  -1    3.41    2.64
  -6  -2  -1    1.47    1.65
  -6  -2  -1    1.98    1.71
  -6  -2  -1    5.84    2.29
  -6  -2  -1    6.08    2.44
  -6  -2  -1    1.18    2.09
  -7  -2  -1   41.15    5.34
   7  -2   1   36.71    5.09
  -7  -2  -1   32.10    4.81
  -7   2  -1   24.64    4.99
  -7  -2  -1   40.52    4.58
   7  -2   1   31.14    3.82
  -7  -2  -1   37.97    5.26
  -7  -2  -1   44.56    4.60
  -7  -2  -1   24.87    4.97
  -7   2  -1   32.32    3.02
  -7  -2  -1   34.36    5.01
   7  -2   1   31.44    4.68
  -7   2  -1   26.49    5.36
  -7   2  -1   19.52    4.57
  -7   2  -1   28.36    5.19
  -7  -2  -1   34.60    5.38
  -8   2  -1   56.51    7.55
  -8  -2  -1   58.86    5.72
  -8  -2  -1   62.40    6.89
  -8  -2  -1   65.42    5.96
  -8   2  -1   51.55    7.36
  -8   2  -1   69.14    7.61
  -8  -2  -1   64.92    7.49
  -8  -2  -1   63.53    7.37
  -8   2  -1   48.68    7.50
  -8  -2  -1   65.82    7.16
   8  -2   1   60.51    6.56
   8  -2   1   52.46    6.42
  -8   2  -1   60.27    4.21
   8  -2   1   56.40    5.32
  -8  -2  -1   53.36    6.78
  -8  -2  -1   62.36    7.02
  -9  -2  -1   20.37    5.35
  -9   2  -1   22.19    5.86
  -9  -2  -1    9.66    3.19
  -9  -2  -1   18.98    3.67
  -9   2  -1   12.43    4.13
  -9  -2  -1   17.93    4.59
  -9   2  -1   23.95    4.85
   9  -2   1   17.78    4.47
  -9   2  -1   20.86    5.20
  -9  -2  -1   18.56    5.02
   9  -2   1   17.00    3.47
  -9  -2  -1   17.61    4.47
  -9  -2  -1    8.88    3.60
  -9  -2  -1   15.88    4.46
 -10  -2  -1   49.73    7.55
 -10  -2  -1   48.65    7.34
 -10   2  -1   45.93    7.73
  10  -2   1   37.92    6.63
 -10   2  -1   28.41    6.51
 -10  -2  -1   28.86    6.13
  10  -2   1   44.40    5.17
 -10   2  -1   33.88    7.23
 -10  -2  -1   31.64    6.34
 -10   2  -1   40.90    6.62
  10   2   1   37.31    2.97
 -10  -2  -1   54.99    7.98
 -10  -2  -1   36.78    5.37
 -10   2  -1   40.61    7.56
 -10  -2  -1   28.66    6.26
 -10  -2  -1   48.54    5.57
 -11  -2  -1  273.59   15.03
 -11   2  -1  264.59   18.04
 -11  -2  -1  249.17   17.41
 -11  -2  -1  263.75   17.70
 -11  -2  -1  238.08   17.13
 -11  -2  -1  242.52   17.09
 -11  -2  -1  252.11   17.08
 -11  -2  -1  235.59   17.42
 -11   2  -1  263.91   18.25
  11   2   1  258.78   12.87
 -11   2  -1  254.56   18.54
 -11  -2  -1  265.24   15.24
  11  -2   1  223.75   16.34
  11  -2   1  255.53   15.15
 -11   2  -1  248.93   17.96
 -12  -2  -1   87.69   10.78
 -12  -2  -1   73.30   10.14
  12   2   1   81.76    5.75
 -12   2  -1   70.80   10.13
 -12  -2  -1   65.83    9.44
 -12   2  -1   90.61   11.78
 -12   2  -1   77.85   10.87
 -12   2  -1   81.73   11.19
  12  -2   1   91.05    7.70
 -12  -2  -1   86.90   10.62
 -12  -2  -1   78.97   10.37
 -12  -2  -1   83.47   10.68
  12  -2   1   76.06    9.78
 -13  -2  -1   -2.86    4.71
 -13   2  -1   -2.39    3.67
 -13  -2  -1    5.85    4.59
  13  -2   1    0.46    2.75
  13   2   1    0.32    2.06
 -13  -2  -1    2.18    3.94
  13  -2   1   -1.71    4.16
 -13  -2  -1    4.39    4.38
 -13   2  -1    4.11    4.44
 -13   2  -1    1.21    4.11
 -13   2  -1    6.02    4.75
 -13  -2  -1    6.65    5.20
 -13  -2  -1    0.05    4.33
 -14   2  -1    0.80    5.31
 -14  -2  -1    0.95    4.66
  14  -2   1    0.51    3.07
 -14  -2  -1   -2.25    4.15
 -14   2  -1    4.62    4.99
 -14   2  -1    0.25    4.36
  14   2   1    0.08    2.52
 -14   2  -1    7.11    5.22
  14  -2   1   -0.95    4.35
 -14  -2  -1   -6.07    3.78
 -14  -2  -1    5.28    5.04
 -14  -2  -1    8.47    5.59
 -14  -2  -1    8.11    5.89
 -15  -2  -1    0.54    5.09
  15   2   1    1.82    2.89
  15  -2   1    1.33    3.77
 -15  -2  -1    4.23    5.81
 -15  -2  -1    8.80    6.05
 -15  -2  -1    4.24    5.60
 -15   2  -1   -1.76    4.74
  15  -2   1    3.98    6.05
 -15  -2  -1    1.39    5.59
  15  -2   1    5.64    5.48
 -15   2  -1    5.53    4.80
 -15   2  -1    6.18    5.69
 -15   2  -1    1.79    5.98
 -16   2  -1    0.17    5.46
 -16  -2  -1   16.12    7.68
 -16  -2  -1   -0.01    6.11
 -16   2  -1    9.88    7.11
 -16  -2  -1    9.01    6.87
  16   2   1    8.04    3.99
  16  -2   1   11.75    6.98
 -16   2  -1   29.08    8.96
 -16  -2  -1   11.72    7.35
  16   2   1    2.11    6.55
 -16  -3   1   -0.87    6.03
  16   3  -1    0.70    3.95
 -16   3   1    1.63    5.58
  16  -3  -1    5.56    5.93
 -16  -3   1   -4.35    5.30
 -16  -3   1    3.47    5.34
 -16  -3   1    2.31    5.38
  16  -3  -1    2.29    6.00
 -16  -3   1   -0.52    5.72
 -16   3   1    1.46    4.78
  16  -3  -1    1.92    4.35
 -16   3   1    8.75    6.49
 -15   3   1   -2.33    4.22
  15  -3  -1   -2.56    4.92
  15   3  -1   -0.04    3.03
 -15   3   1    0.95    4.27
 -15  -3   1    6.29    5.19
 -15  -3   1    2.68    5.23
 -15  -3   1   10.64    6.06
  15  -3  -1    1.70    5.30
 -15   3   1    5.19    4.89
 -15  -3   1    5.60    5.18
 -15   3   1    2.77    6.08
  15  -3  -1    1.92    4.02
 -15  -3   1    7.75    6.35
 -14  -3   1   -2.12    4.56
  14  -3  -1    1.64    3.17
 -14  -3   1    8.56    5.59
  14  -3  -1    1.06    4.41
  14   3  -1   -1.02    2.64
 -14   3   1    8.93    5.16
  14  -3  -1    6.67    4.82
 -14   3   1   10.94    5.75
 -14   3   1    2.33    4.32
 -14   3   1    6.88    4.92
 -14  -3   1   10.57    4.96
 -14  -3   1    6.21    4.71
 -14  -3   1   -1.85    3.72
 -13  -3   1    5.59    4.47
 -13  -3   1    3.24    4.89
  13  -3  -1   -4.88    3.54
 -13  -3   1    0.39    4.09
  13  -3  -1    2.38    3.14
 -13   3   1    1.74    4.33
 -13  -3   1   -4.24    3.72
 -13   3   1    0.45    3.91
 -13   3   1    1.94    4.78
  13   3  -1   -0.84    2.34
  13  -3  -1    2.01    3.98
 -13  -3   1   -1.06    3.33
 -13  -3   1    0.44    3.91
 -13   3   1    1.81    3.97
 -12  -3   1   50.09    7.48
 -12   3   1   44.34    8.50
 -12   3   1   39.78    8.24
 -12   3   1   62.82    9.72
 -12  -3   1   42.74    8.25
 -12  -3   1   37.20    5.75
  12   3  -1   38.15    4.96
 -12  -3   1   44.80    7.66
 -12  -3   1   33.90    6.89
 -12   3   1   52.16    8.34
  12   3  -1   48.69    6.17
  12  -3  -1   41.53    6.16
  12  -3  -1   55.28    8.46
  12  -3  -1   58.99    8.64
 -12  -3   1   46.02    8.68
 -12  -3   1   51.17    8.21
 -11  -3   1   17.10    4.27
  11   3  -1    9.91    3.51
 -11  -3   1   24.99    5.81
 -11   3   1   13.52    5.34
  11   3  -1   15.14    3.24
  11  -3  -1   19.09    5.51
 -11  -3   1   20.93    5.05
 -11  -3   1   21.40    6.12
 -11   3   1   14.15    4.63
  11  -3  -1   18.84    4.33
 -11   3   1   13.28    5.51
 -11  -3   1   11.56    4.52
 -11  -3   1    9.40    5.13
  11  -3  -1   16.42    5.27
 -11   3   1    5.75    4.09
 -11  -3   1   10.68    4.88
 -10   3   1  219.95   16.10
 -10  -3   1  255.00   15.31
  10  -3  -1  208.39   14.88
 -10   3   1  229.04   15.92
 -10  -3   1  229.05   13.54
 -10  -3   1  218.49   16.18
 -10   3   1  229.04   16.22
  10   3  -1  213.05   13.59
 -10  -3   1  234.96   14.78
 -10  -3   1  230.13   15.01
 -10   3   1  215.98   15.57
 -10  -3   1  220.23   15.27
 -10  -3   1  212.08   15.59
  10  -3  -1  235.11   14.31
  10  -3  -1  237.85   15.60
  10   3  -1  260.09   13.16
   9   3  -1   -0.44    1.69
   9  -3  -1    8.49    3.62
   9  -3  -1    0.63    2.05
   9   3  -1    0.47    2.00
  -9  -3   1    2.02    3.37
  -9   3   1   -0.03    3.14
  -9   3   1    4.44    3.67
  -9  -3   1   -0.27    2.23
  -9  -3   1    0.52    2.58
   9   3  -1   -0.76    2.12
  -9  -3   1   -0.48    2.73
  -9   3   1   10.52    3.76
   9  -3  -1    2.11    3.14
  -9   3   1    2.93    3.29
  -9  -3   1    4.88    2.86
  -9  -3   1    2.65    2.77
  -9  -3   1   -0.53    2.15
   8  -3  -1   31.97    5.55
  -8  -3   1   33.22    6.17
  -8  -3   1   35.25    4.66
  -8   3   1   43.44    6.49
  -8  -3   1   31.10    4.41
  -8  -3   1   42.66    6.60
   8   3  -1   40.04    4.07
  -8   3   1   40.53    5.72
   8   3  -1   35.80    4.46
  -8  -3   1   39.05    5.35
  -8  -3   1   34.77    5.04
  -8   3   1   26.70    5.62
  -8   3   1   31.41    5.95
   8  -3  -1   30.27    4.32
   8   3  -1   37.99    3.82
   8  -3  -1   42.30    5.81
  -8  -3   1   44.65    5.53
  -7  -3   1  197.11   13.03
   7  -3  -1  199.94   13.50
  -7   3   1  176.37   12.55
  -7  -3   1  197.31   11.56
   7   3  -1  189.96   11.64
  -7  -3   1  206.71   12.24
  -7   3   1  211.77    9.72
   7  -3  -1  192.56   11.86
   7  -3  -1  202.15   12.76
   7  -3  -1  190.16   12.41
   7  -3  -1  228.17   10.60
  -7   3   1  185.29   13.03
  -7  -3   1  190.89   11.71
  -7  -3   1  205.90   13.56
   7   3  -1  196.64   10.95
  -7   3   1  191.53   12.54
   7   3  -1  199.19   10.97
  -7  -3   1  203.68   11.56
  -7   3   1  189.03   12.96
  -7  -3   1  193.43   11.77
   6   3  -1   19.22    3.18
  -6   3   1   14.72    3.70
  -6  -3   1   10.50    3.43
   6   3  -1   14.01    2.50
  -6  -3   1   19.02    3.31
  -6   3   1   19.14    3.61
  -6   3   1   30.03    4.91
   6  -3  -1   18.97    3.85
   6  -3  -1   18.66    4.42
  -6  -3   1   18.07    3.22
   6   3  -1   20.03    2.71
  -6   3   1   20.82    4.19
  -6  -3   1   13.13    3.64
  -6   3   1   35.64    5.22
  -6  -3   1   20.14    3.30
  -6   3   1   20.96    2.34
   6  -3  -1   24.46    3.56
   6  -3  -1   31.50    4.46
  -6  -3   1   16.10    2.82
   6  -3  -1   16.70    2.58
  -6  -3   1   16.74    3.26
   5  -3  -1    2.31    1.48
  -5  -3   1    3.94    1.82
  -5  -3   1    3.25    1.62
   5  -3  -1    2.03    1.71
   5  -3  -1   -0.65    1.47
  -5   3   1    0.23    1.71
   5   3  -1    0.86    1.28
  -5  -3   1    4.28    1.77
   5   3  -1    0.17    1.26
  -5   3   1    7.10    2.49
  -5   3   1    3.01    1.68
   5   3  -1    1.97    1.48
  -5  -3   1   -0.49    1.41
  -5   3   1    4.61    1.34
  -5   3   1    1.26    1.07
  -5  -3   1    0.51    2.17
  -5  -3   1    3.93    2.28
  -5   3   1    1.68    1.97
  -5   3   1    7.47    2.84
  -5   3   1    0.60    1.20
   5  -3  -1    1.38    1.96
  -4   3   1   37.20    2.32
  -4  -3   1   43.99    3.60
   4  -3  -1   39.45    3.24
  -4   3   1   43.92    4.72
  -4   3   1   38.46    3.11
   4  -3  -1   40.31    4.46
  -4   3   1   41.37    4.96
   4   3  -1   38.43    3.73
  -4   3   1   40.13    3.51
  -4  -3   1   40.73    3.99
   4  -3  -1   35.82    3.94
  -4   3   1   42.94    4.05
   4   3  -1   32.83    3.41
  -4  -3   1   35.41    4.67
   4   3  -1   35.15    3.74
  -4  -3   1   38.48    4.72
  -4   3   1   38.29    2.60
   3  -3  -1   -1.28    1.10
  -3   3   1    0.94    1.82
  -3  -3   1    1.40    1.08
   3  -3  -1    1.51    1.11
   3  -3  -1   -1.31    0.97
   3   3  -1    0.13    1.26
  -3  -3   1   -0.84    1.21
  -3   3   1    1.49    0.74
   3   3  -1    1.48    1.18
  -3   3   1    2.75    1.10
  -3   3   1    0.47    1.10
  -3  -3   1    0.84    0.49
  -3   3   1    1.69    1.35
  -3   3   1    0.37    1.25
   3   3  -1    0.52    1.06
  -2   3   1  246.49   12.75
  -2   3   1  244.38   12.72
  -2   3   1  254.37   14.33
   2   3  -1  262.61   12.06
  -2  -3   1  245.26   13.44
   2  -3  -1  251.69   13.24
   2  -3  -1  237.10   12.03
   2  -3  -1  254.26   12.23
  -2  -3   1  252.87   11.70
   2   3  -1  254.80   13.74
  -2  -3   1  254.81   12.48
  -2  -3   1  252.75   12.91
   2  -3  -1  241.43   13.14
   2   3  -1  240.49   13.15
  -2  -3   1  268.30   11.32
   2   3  -1  274.70   13.07
   1   3  -1  162.69    8.34
  -1  -3   1  159.05    7.68
   1   3  -1  156.02    8.56
  -1  -3   1  163.11    8.88
  -1  -3   1  164.59    8.28
   1  -3  -1  154.49    8.31
   1  -3  -1  151.20    8.74
   1  -3  -1  155.50    8.08
  -1  -3   1  160.13    8.41
  -1  -3   1  156.34    9.03
   1  -3  -1  153.64    7.90
  -1   3   1  155.10    8.55
   1  -3  -1  157.09    8.52
   1  -3  -1  152.10    8.95
   1   3  -1  166.03    9.68
   0  -3  -1  313.16   15.95
   0   3   1  328.51   15.23
   0  -3   1  324.75   16.26
   0   3  -1  304.18   15.31
   0   3  -1  325.17   15.45
   0   3   1  303.22   15.90
   0  -3   1  293.22   14.71
   0  -3   1  324.51   15.78
   0  -3  -1  327.39   15.83
   0  -3  -1  332.19   14.96
   0   3   1  316.41   14.74
   0  -3  -1  314.09   14.46
   0  -3   1  312.94   15.53
   0  -3  -1  336.38   15.74
   0   3   1  331.93   16.92
   0  -3  -1  326.83   14.63
  -1   3  -1  493.24   22.48
   1   3   1  502.77   21.76
   1   3   1  484.54   23.18
  -1  -3  -1  489.13   21.68
  -1  -3  -1  492.27   21.11
   1  -3   1  481.26   23.19
  -1   3  -1  468.97   22.49
   1  -3   1  515.63   22.82
   1  -3   1  469.50   21.94
  -1   3  -1  476.71   24.50
   1   3   1  453.28   21.73
  -1  -3  -1  480.48   22.86
   1   3   1  496.13   24.04
  -1  -3  -1  502.83   23.28
  -1  -3  -1  484.13   23.12
   2  -3   1   27.17    2.57
  -2   3  -1   26.97    3.22
   2   3   1   24.95    2.43
  -2  -3  -1   30.26    3.32
  -2   3  -1   28.13    2.50
   2   3   1   28.11    3.09
  -2   3  -1   32.99    3.04
   2  -3   1   25.33    3.28
   2  -3   1   29.90    3.67
  -2  -3  -1   29.41    2.26
  -2  -3  -1   29.54    3.74
  -2   3  -1   25.84    2.63
  -2   3  -1   32.59    4.09
  -3   3  -1    6.81    2.30
   3   3   1   10.40    1.45
   3  -3   1    7.50    2.04
  -3  -3  -1    6.26    2.02
   3   3   1    9.63    1.81
  -3  -3  -1    9.57    1.78
  -3   3  -1    7.75    1.40
  -3   3  -1   10.10    2.46
  -3   3  -1    8.80    1.60
  -3  -3  -1   12.95    2.60
  -3   3  -1    8.94    1.72
   3  -3   1    7.71    1.93
  -3   3  -1    6.30    2.36
  -4   3  -1  358.50   18.66
  -4  -3  -1  323.24   18.47
  -4  -3  -1  352.98   18.16
   4   3   1  338.82   16.86
   4  -3   1  347.48   18.28
   4   3   1  332.24   16.50
  -4   3  -1  358.04   18.48
   4  -3   1  368.76   17.81
  -4  -3  -1  348.46   17.42
  -4  -3  -1  349.10   17.33
  -4   3  -1  348.97   18.86
   4  -3   1  371.68   16.64
  -4   3  -1  353.74   15.65
  -4   3  -1  332.10   18.12
  -4   3  -1  359.59   16.63
   4  -3   1  333.59   19.11
  -4  -3  -1  362.66   18.14
  -4   3  -1  364.45   18.85
  -4   3  -1  358.19   16.24
  -5  -3  -1    1.06    1.59
  -5  -3  -1    1.65    1.66
   5  -3   1   -0.05    1.74
  -5  -3  -1   -0.24    1.97
   5  -3   1   -1.62    1.99
  -5  -3  -1    3.41    1.95
  -5   3  -1    0.61    0.88
   5  -3   1   -0.26    1.54
  -5   3  -1    0.96    1.03
  -5  -3  -1    0.07    1.56
  -5   3  -1   -0.04    2.00
   5  -3   1    0.98    1.66
   5   3   1    0.10    0.81
   5   3   1    1.11    0.76
   5  -3   1   -1.01    1.33
  -5   3  -1    0.79    1.71
  -5   3  -1    0.49    1.99
  -5  -3  -1    0.40    1.83
  -5   3  -1    5.63    2.52
  -6  -3  -1  137.01   10.14
  -6   3  -1  129.25    7.46
  -6  -3  -1  140.41    9.30
  -6   3  -1  133.52   10.05
  -6  -3  -1  147.54    9.17
  -6   3  -1  127.68   10.06
  -6  -3  -1  137.75    9.01
  -6  -3  -1  139.38    9.03
  -6  -3  -1  143.35    9.17
   6  -3   1  142.34    7.73
   6  -3   1  148.85    9.28
  -6   3  -1  122.73    9.75
  -6   3  -1  113.28    9.72
   6  -3   1  150.51   10.56
  -6  -3  -1  158.36   10.44
  -6  -3  -1  140.59    9.23
   6  -3   1  131.15    9.00
   6  -3   1  142.80    9.40
  -7  -3  -1  425.73   24.82
  -7  -3  -1  489.47   24.12
  -7  -3  -1  458.22   24.30
  -7   3  -1  454.94   25.68
   7  -3   1  475.21   25.72
  -7   3  -1  423.22   25.03
  -7   3  -1  488.88   21.81
  -7   3  -1  443.75   25.31
  -7  -3  -1  476.23   24.74
  -7  -3  -1  490.99   24.32
   7  -3   1  484.64   24.32
  -7  -3  -1  484.20   23.47
  -7   3  -1  433.66   24.74
  -7  -3  -1  486.90   24.02
  -7  -3  -1  491.35   23.84
   7  -3   1  456.30   23.56
   8  -3   1  147.04   10.46
  -8  -3  -1  148.50   10.61
  -8  -3  -1  157.47   10.98
  -8   3  -1  140.38   11.77
   8  -3   1  145.80   10.69
  -8  -3  -1  161.64   10.88
  -8  -3  -1  146.96   11.64
  -8  -3  -1  140.83   11.21
  -8   3  -1  155.13   12.08
  -8  -3  -1  127.94   10.18
  -8   3  -1  137.43   11.35
  -8  -3  -1  154.27   10.23
  -8  -3  -1  166.23   10.38
   8  -3   1  173.24   10.50
  -8   3  -1  149.80   11.59
  -9  -3  -1   59.63    7.09
   9  -3   1   59.91    7.21
  -9   3  -1   48.28    7.31
  -9  -3  -1   43.20    5.67
  -9  -3  -1   55.47    7.14
  -9   3  -1   49.02    8.23
  -9  -3  -1   60.25    7.34
   9  -3   1   58.61    6.14
  -9   3  -1   40.56    7.42
  -9   3  -1   50.73    8.21
  -9  -3  -1   55.52    6.24
  -9  -3  -1   51.10    6.89
  -9  -3  -1   60.29    8.14
   9  -3   1   43.09    6.31
  -9  -3  -1   56.52    7.77
 -10  -3  -1   90.74   10.46
 -10  -3  -1  102.69    9.75
 -10  -3  -1   94.78    8.17
 -10  -3  -1  123.15   10.86
 -10   3  -1   81.72   10.72
  10  -3   1  103.54    8.36
  10  -3   1  113.54   10.05
 -10  -3  -1   94.41    8.38
 -10   3  -1   81.82   10.43
 -10   3  -1   79.01    9.83
  10  -3   1  114.36   10.31
 -10  -3  -1   93.61   10.58
 -10   3  -1   86.18   10.77
 -10  -3  -1  102.30   10.13
 -10  -3  -1   90.97    9.77
 -11  -3  -1   15.44    5.97
 -11   3  -1   12.59    5.44
  11  -3   1   14.46    4.72
  11  -3   1   15.69    5.13
 -11   3  -1   15.92    5.49
  11  -3   1    4.48    3.20
 -11  -3  -1   17.58    5.39
 -11  -3  -1   18.09    5.57
 -11  -3  -1    7.52    4.46
  11   3   1   19.72    2.55
 -11  -3  -1   14.67    5.13
 -11   3  -1    6.69    4.91
 -11  -3  -1   17.59    5.17
 -11  -3  -1   20.81    4.61
 -11  -3  -1   16.59    4.43
 -11   3  -1   15.76    5.50
 -12  -3  -1   12.55    6.10
  12  -3   1   11.92    5.47
 -12  -3  -1   11.78    5.01
 -12   3  -1   11.52    5.70
 -12  -3  -1   16.56    5.66
 -12  -3  -1   21.40    5.07
 -12  -3  -1   24.37    6.80
  12  -3   1   10.24    3.77
  12  -3   1   15.96    5.52
 -12  -3  -1   16.25    5.61
 -12   3  -1   15.10    6.14
  12   3   1   20.51    2.95
 -12  -3  -1   20.78    6.33
 -12   3  -1   16.91    5.78
 -12   3  -1   29.43    7.67
 -13   3  -1   21.11    6.86
  13  -3   1   19.12    5.89
 -13   3  -1   10.06    5.26
  13   3   1   16.23    3.17
  13  -3   1   25.10    6.80
 -13  -3  -1   12.23    5.70
  13  -3   1   20.44    5.04
 -13  -3  -1   22.12    7.15
 -13  -3  -1   18.16    6.08
 -13   3  -1   10.39    6.01
 -13  -3  -1   21.39    7.30
 -13   3  -1   16.01    6.37
 -13  -3  -1   19.13    6.42
 -13  -3  -1   25.00    6.81
  14  -3   1   16.38    6.52
 -14  -3  -1    1.83    5.36
 -14   3  -1   13.60    6.20
 -14   3  -1    4.22    4.58
 -14   3  -1    3.71    4.66
 -14   3  -1   10.47    6.31
  14  -3   1   10.04    5.45
 -14  -3  -1    3.18    4.84
  14   3   1    3.80    2.97
 -14  -3  -1    4.86    5.48
 -14  -3  -1   -0.72    4.54
 -14  -3  -1   10.53    6.19
  14  -3   1   -1.50    3.06
  15  -3   1   17.47    6.58
  15   3   1   11.93    3.71
  15  -3   1    7.72    4.66
 -15   3  -1    6.23    5.68
 -15  -3  -1   11.15    6.72
 -15   3  -1   19.18    7.41
 -15  -3  -1    4.96    5.53
 -15  -3  -1   18.01    7.40
 -15  -3  -1   10.62    6.82
 -15   3  -1    7.00    6.11
 -15  -3  -1    9.37    5.82
 -16   3  -1    8.83    7.02
 -16   3  -1   15.55    7.41
 -16  -3  -1   17.92    7.66
 -16  -3  -1   14.92    7.64
 -16   3  -1   12.97    7.17
  16   3   1   12.96    4.63
 -16  -3  -1   13.65    6.85
 -16  -4   1   19.14    7.62
 -16   4   1    6.62    6.28
 -16   4   1    5.95    5.89
 -16  -4   1    7.27    5.89
 -16  -4   1   14.09    7.57
  16   4  -1   16.99    5.50
  16  -4  -1   15.58    7.56
 -16   4   1   19.71    7.88
 -16  -4   1   20.78    8.01
  16  -4  -1   10.37    6.36
  15  -4  -1   26.82    7.73
 -15  -4   1   33.39    7.96
 -15   4   1   21.75    7.42
  15  -4  -1   34.46    6.88
 -15   4   1   39.74   10.27
 -15  -4   1   29.14    8.34
  15  -4  -1   38.03    8.87
 -15  -4   1   16.66    6.81
 -15  -4   1   29.44    9.07
 -15  -4   1   32.57    8.68
 -15   4   1   27.99    8.11
 -15   4   1   30.33    8.80
  15   4  -1   25.61    5.52
 -14  -4   1   38.78    9.05
 -14   4   1   17.31    6.13
  14  -4  -1   37.67    8.11
 -14   4   1   17.35    6.56
  14  -4  -1   10.98    4.70
 -14   4   1   24.56    7.68
  14   4  -1   26.46    4.98
 -14   4   1   18.31    7.35
  14  -4  -1   30.83    7.89
 -14  -4   1   22.87    6.91
 -14  -4   1   20.56    7.67
 -14  -4   1   23.26    6.76
 -14  -4   1   18.84    6.50
 -13  -4   1   18.42    5.88
 -13   4   1   24.74    7.09
 -13  -4   1   32.55    7.57
 -13  -4   1   24.24    5.41
  13  -4  -1   13.99    4.85
  13  -4  -1   17.30    6.22
  13  -4  -1   20.10    6.04
 -13  -4   1   26.97    7.73
 -13   4   1   17.91    6.09
 -13   4   1   23.01    7.26
  13   4  -1   22.75    4.41
 -13   4   1   21.55    6.88
 -13  -4   1   19.38    6.86
 -13  -4   1   31.11    6.96
 -12  -4   1  124.90   10.08
  12  -4  -1  109.44   10.48
  12   4  -1  115.87   10.05
  12   4  -1  126.13    9.19
  12  -4  -1  117.61   12.24
 -12  -4   1  114.56   11.91
 -12  -4   1  169.51   14.51
  12  -4  -1  109.06   11.72
 -12   4   1  114.82   13.14
 -12  -4   1  153.48   14.47
 -12  -4   1  131.34   12.24
 -12   4   1  101.85   11.85
 -12   4   1  132.29   13.40
 -12   4   1  161.20   14.96
 -12  -4   1  134.48   12.33
 -11  -4   1    0.83    4.35
 -11  -4   1    0.01    3.97
 -11   4   1    8.88    4.75
 -11   4   1    2.46    3.79
 -11  -4   1    2.34    3.55
 -11  -4   1    1.76    3.28
  11  -4  -1    6.87    4.44
  11   4  -1    5.84    3.47
  11   4  -1    1.74    2.61
 -11   4   1    6.43    4.93
 -11   4   1   -1.92    2.74
  11  -4  -1   -1.62    2.80
 -11  -4   1    7.61    3.81
  11  -4  -1   -4.36    3.20
 -11  -4   1   10.85    4.40
  10  -4  -1   68.28    7.48
 -10  -4   1   86.67    8.90
  10   4  -1   68.08    6.37
 -10  -4   1   70.98    7.50
  10   4  -1   71.61    7.35
 -10  -4   1   67.53    9.53
 -10  -4   1   69.55    9.52
 -10   4   1   68.92    9.49
 -10  -4   1   80.35    8.52
 -10   4   1   60.05    8.99
 -10  -4   1   77.81    8.47
 -10   4   1   91.60   10.53
 -10   4   1   94.81    9.60
  10  -4  -1   80.89    9.06
  10  -4  -1   66.12    8.67
   9  -4  -1   62.57    8.01
  -9  -4   1   55.46    6.45
  -9  -4   1   61.21    8.57
   9  -4  -1   64.77    6.93
   9   4  -1   63.97    5.85
  -9  -4   1   73.54    7.51
  -9   4   1   73.53    8.94
   9  -4  -1   56.31    7.36
   9   4  -1   79.80    7.14
  -9  -4   1   67.53    7.37
  -9   4   1   62.46    8.65
  -9  -4   1   81.81    9.74
  -9  -4   1   63.27    7.26
  -9   4   1   75.71    9.00
  -9   4   1   53.24    7.43
  -8  -4   1   65.72    6.61
  -8   4   1   72.26    8.28
  -8  -4   1   71.01    6.18
   8  -4  -1   63.49    7.57
  -8   4   1   63.99    4.49
   8  -4  -1   71.91    5.67
  -8   4   1   60.86    7.86
  -8   4   1   66.39    8.30
   8  -4  -1   70.12    6.62
   8  -4  -1   70.40    7.58
  -8   4   1   63.18    7.39
   8   4  -1   58.51    5.50
  -8  -4   1   65.86    8.34
   8   4  -1   68.61    6.57
  -8  -4   1   63.74    6.61
  -8  -4   1   68.44    6.66
  -8  -4   1   50.86    7.59
  -8  -4   1   66.00    6.87
   8   4  -1   64.17    5.75
   7   4  -1   52.65    5.02
  -7   4   1   47.93    3.97
  -7  -4   1   46.27    5.52
   7  -4  -1   51.87    5.67
  -7   4   1   53.51    6.25
  -7   4   1   50.11    6.80
  -7  -4   1   49.90    4.73
   7  -4  -1   58.95    6.80
   7  -4  -1   57.23    5.00
  -7  -4   1   46.86    5.43
   7   4  -1   58.89    5.24
  -7  -4   1   46.37    5.40
   7  -4  -1   56.00    6.39
  -7  -4   1   37.58    6.56
  -7  -4   1   43.33    6.84
  -7   4   1   46.96    6.65
  -7  -4   1   62.14    5.99
   7   4  -1   51.09    5.49
  -7   4   1   53.60    7.00
  -6  -4   1 1182.02   50.02
  -6  -4   1 1067.66   50.88
   6   4  -1 1086.03   52.14
  -6  -4   1 1093.83   51.06
   6   4  -1 1079.27   51.38
  -6   4   1 1114.71   48.38
  -6   4   1 1098.74   52.56
  -6  -4   1 1060.48   49.04
  -6   4   1 1080.70   47.85
   6  -4  -1 1175.55   49.39
  -6   4   1 1099.64   52.05
   6  -4  -1 1127.87   52.94
   6  -4  -1 1133.44   51.52
  -6   4   1 1092.30   51.45
  -6  -4   1 1148.26   49.83
   6  -4  -1 1013.50   49.76
  -6   4   1 1162.29   53.97
  -6  -4   1 1071.41   52.22
  -6   4   1 1084.09   48.70
   6   4  -1 1161.52   51.84
  -6   4   1 1076.09   50.66
  -5   4   1  154.38    9.66
  -5  -4   1  151.21    8.99
  -5   4   1  146.51    9.78
  -5  -4   1  144.55    8.59
  -5   4   1  144.19    7.26
  -5   4   1  140.32    9.88
   5  -4  -1  157.62   10.25
   5  -4  -1  150.70    9.70
   5   4  -1  134.02    8.80
  -5  -4   1  153.35    9.39
   5   4  -1  149.10    9.44
  -5  -4   1  118.41    9.85
  -5   4   1  152.65    8.32
  -5  -4   1  140.39   10.16
   5  -4  -1  129.92    9.39
  -5  -4   1  143.63    8.69
   5   4  -1  134.68    9.15
   5  -4  -1  155.72    8.50
  -5   4   1  147.39    8.52
  -5   4   1  165.75   11.09
  -5   4   1  157.94   10.23
   4  -4  -1   -2.04    1.51
  -4  -4   1   -0.30    1.13
  -4   4   1    1.78    2.04
   4  -4  -1   -1.38    1.25
  -4   4   1    0.73    0.95
  -4   4   1   -0.59    1.13
  -4   4   1    1.60    2.25
  -4   4   1    2.37    1.73
  -4  -4   1   -2.24    1.83
  -4  -4   1   -0.54    1.57
   4  -4  -1    1.64    2.11
   4   4  -1    0.37    1.62
  -4  -4   1   -2.19    1.41
   4  -4  -1   -0.69    1.47
   4   4  -1    1.16    1.50
   4  -4  -1    2.96    2.13
  -4   4   1    0.05    0.75
   4   4  -1   -2.80    1.17
  -3  -4   1  132.40    9.44
   3  -4  -1  149.80    7.95
  -3  -4   1  145.48    7.04
   3   4  -1  155.16    9.57
  -3   4   1  131.11    8.67
  -3   4   1  123.91    8.24
   3   4  -1  148.03    7.72
   3  -4  -1  146.14    9.13
  -3  -4   1  144.09    8.71
  -3   4   1  140.06   10.13
  -3   4   1  135.65    8.34
  -3   4   1  148.32    7.97
   3   4  -1  148.17    8.93
   3   4  -1  146.09    8.77
   3  -4  -1  148.50    9.33
  -3  -4   1  146.08    9.50
   3  -4  -1  103.42    8.34
   3  -4  -1  142.30    9.01
  -3   4   1  153.14    7.68
  -3  -4   1  151.46    8.14
   2  -4  -1    1.60    1.82
  -2  -4   1   -0.17    0.96
  -2   4   1    2.54    1.29
  -2  -4   1    1.02    1.90
   2  -4  -1   -0.34    1.37
  -2   4   1   -2.05    1.30
  -2   4   1   -1.59    1.86
   2  -4  -1   -0.18    1.13
   2  -4  -1   -1.12    1.19
  -2  -4   1    0.66    1.59
   2   4  -1   -2.13    0.87
  -2  -4   1    0.22    0.76
  -2  -4   1    0.75    1.75
   2   4  -1    0.85    1.45
  -2  -4   1   -0.73    0.83
  -2   4   1    0.54    0.99
  -2  -4   1   -1.19    0.99
   2  -4  -1    0.27    1.21
   2   4  -1   -1.35    1.32
  -2  -4   1    0.97    1.31
   2   4  -1   -0.13    1.46
   2  -4  -1    2.98    1.52
   1  -4  -1    1.54    1.60
   1   4  -1    1.60    1.65
   1   4  -1   -0.50    0.94
  -1  -4   1    0.52    1.33
   1  -4  -1    1.88    1.25
   1  -4  -1    0.77    1.21
  -1   4   1   -0.45    1.47
  -1  -4   1    1.43    1.42
   1  -4  -1   -1.10    0.97
   1  -4  -1   -0.89    1.13
  -1  -4   1    0.28    1.00
   1  -4  -1    0.88    1.25
  -1   4   1   -0.52    1.37
  -1  -4   1   -0.60    0.99
   1   4  -1    1.93    2.01
   1  -4  -1    0.50    1.50
  -1  -4   1    0.04    1.47
   0   4   1  255.77   13.18
   0  -4  -1  260.50   12.18
   0  -4  -1  262.50   13.86
   0   4   1  259.46   14.94
   0  -4  -1  257.95   12.92
   0  -4  -1  251.81   13.41
   0  -4   1  278.51   13.47
   0  -4  -1  246.40   14.05
   0  -4   1  269.63   14.01
   0   4  -1  275.02   13.34
   0  -4   1  247.10   12.43
   0   4  -1  257.69   13.38
   0  -4   1  251.98   14.02
   0  -4  -1  260.30   12.35
   0  -4   1  254.89   13.30
   0  -4  -1  250.79   13.60
  -1  -4  -1   51.18    5.39
   1  -4   1   63.65    5.07
   1   4   1   51.03    4.04
  -1  -4  -1   59.06    3.51
   1   4   1   55.26    4.59
  -1  -4  -1   54.99    5.42
  -1   4  -1   64.80    6.20
  -1   4  -1   55.57    4.76
  -1   4  -1   54.05    4.11
  -1  -4  -1   53.48    3.81
  -1   4  -1   57.82    4.19
  -1  -4  -1   55.52    4.63
   1  -4   1   53.70    5.10
   1  -4   1   56.33    4.68
  -1  -4  -1   54.25    4.18
   1  -4   1   54.15    4.01
  -1  -4  -1   58.39    4.70
   1  -4   1   55.45    4.97
   1   4   1   53.59    5.39
   2  -4   1  824.75   38.94
  -2  -4  -1  864.71   39.81
  -2   4  -1  850.78   42.90
  -2   4  -1  822.08   39.55
  -2  -4  -1  881.65   40.77
   2   4   1  887.64   42.07
  -2   4  -1  886.08   39.62
  -2  -4  -1  852.28   40.71
   2  -4   1  896.96   39.28
   2   4   1  896.12   38.44
  -2   4  -1  881.94   38.38
  -2  -4  -1  877.28   38.92
  -2   4  -1  878.96   40.59
   2   4   1  875.41   41.06
   2  -4   1  878.24   39.96
  -2  -4  -1  895.75   36.72
   2  -4   1  923.14   41.00
  -2  -4  -1  865.85   39.36
  -3   4  -1  313.98   16.52
  -3   4  -1  337.68   15.26
  -3  -4  -1  323.08   16.57
  -3  -4  -1  310.26   17.17
  -3  -4  -1  320.38   16.20
   3  -4   1  315.29   16.95
  -3   4  -1  288.02   15.30
   3  -4   1  309.54   16.18
   3  -4   1  308.97   16.96
  -3  -4  -1  284.70   16.45
   3   4   1  325.55   15.87
  -3   4  -1  300.28   15.06
   3  -4   1  312.82   15.16
  -3   4  -1  298.56   16.49
  -3   4  -1  308.95   16.35
  -3   4  -1  316.05   17.96
  -3  -4  -1  309.17   15.02
   3   4   1  285.66   16.36
  -4  -4  -1  172.38    9.79
   4  -4   1  176.65   10.75
   4  -4   1  184.38   11.21
  -4  -4  -1  196.66   11.03
  -4  -4  -1  175.53   11.76
  -4   4  -1  164.76   11.09
   4   4   1  179.90    9.76
  -4   4  -1  169.99    9.49
  -4   4  -1  166.79    9.48
   4  -4   1  169.28   10.37
  -4   4  -1  176.85    9.32
  -4   4  -1  193.92   11.50
   4   4   1  187.30   10.54
   4  -4   1  184.14    9.74
  -4  -4  -1  162.94   11.26
  -4   4  -1  175.31   11.18
  -4   4  -1  188.18   12.06
  -4  -4  -1  186.81   11.03
   5  -4   1   53.53    5.38
  -5   4  -1   38.74    3.40
   5   4   1   46.23    3.69
  -5  -4  -1   44.21    6.09
  -5   4  -1   42.65    5.84
  -5  -4  -1   49.11    6.19
  -5   4  -1   50.08    4.10
  -5   4  -1   40.30    6.03
   5  -4   1   50.66    4.29
  -5   4  -1   46.70    6.09
  -5   4  -1   43.58    3.14
  -5  -4  -1   49.32    4.72
  -5   4  -1   49.40    6.01
  -5   4  -1   40.56    5.51
  -5  -4  -1   40.15    5.00
   5   4   1   42.63    4.17
   5  -4   1   46.78    5.35
  -5  -4  -1   47.72    5.39
  -6  -4  -1   23.70    5.23
   6   4   1   29.03    2.86
  -6   4  -1   23.00    4.91
  -6  -4  -1   23.73    3.78
  -6  -4  -1   32.03    4.67
  -6   4  -1   28.61    5.09
  -6   4  -1   31.70    5.29
  -6   4  -1   31.88    5.78
   6   4   1   26.79    3.07
  -6  -4  -1   29.02    4.06
  -6  -4  -1   22.85    3.55
  -6  -4  -1   32.04    4.23
  -6   4  -1   26.48    2.87
  -6   4  -1   24.08    2.70
  -6  -4  -1   26.58    5.36
   6  -4   1   22.20    3.17
   6  -4   1   18.53    3.96
   6  -4   1   26.62    4.45
   6  -4   1   30.80    4.57
  -6  -4  -1   26.97    4.44
   7  -4   1  336.96   19.09
  -7  -4  -1  323.34   19.55
  -7   4  -1  317.57   15.41
  -7   4  -1  356.60   16.34
  -7  -4  -1  353.54   18.30
  -7  -4  -1  352.85   18.13
  -7  -4  -1  334.15   18.70
   7   4   1  350.01   17.09
   7   4   1  348.75   16.64
  -7   4  -1  313.43   19.66
  -7  -4  -1  352.25   18.60
  -7   4  -1  333.14   19.74
   7  -4   1  337.96   18.33
  -7   4  -1  337.38   15.33
  -7  -4  -1  343.57   18.22
  -7  -4  -1  335.25   20.11
  -7   4  -1  341.68   20.50
  -7   4  -1  318.78   19.80
   7  -4   1  316.54   18.62
  -7  -4  -1  339.21   18.69
  -8   4  -1  113.85   11.08
  -8   4  -1  111.40   10.77
   8  -4   1  102.95    9.18
  -8  -4  -1  103.77   10.46
  -8  -4  -1  100.21    8.23
  -8  -4  -1   80.54    9.37
   8   4   1  101.03    6.42
   8  -4   1   91.97    8.58
  -8   4  -1   91.00   10.02
  -8  -4  -1   95.79    8.83
  -8  -4  -1   98.09    8.07
  -8  -4  -1  107.43    8.60
   8   4   1  111.52    6.29
   8  -4   1  115.30    9.27
  -8   4  -1   91.82    9.60
  -8  -4  -1   96.63    8.63
  -9   4  -1   89.09   10.59
   9   4   1  109.37    6.81
   9  -4   1  109.04    9.99
  -9   4  -1  101.59   11.21
  -9  -4  -1  106.33   11.16
   9  -4   1  103.33    9.56
  -9  -4  -1   96.17    8.86
  -9  -4  -1  101.67    9.06
   9   4   1  111.55    6.65
  -9  -4  -1  122.94   11.31
  -9  -4  -1   99.20    9.58
   9  -4   1  121.21    9.34
  -9   4  -1   97.01   10.50
  -9  -4  -1  116.18    9.61
  -9  -4  -1   89.10    9.23
  -9  -4  -1  121.92    9.30
  -9   4  -1  128.23   12.25
 -10   4  -1  122.16   12.30
 -10   4  -1  122.15   12.93
 -10  -4  -1  144.28   11.45
  10  -4   1  132.78   11.72
  10  -4   1  139.29   10.71
  10   4   1  147.32    8.34
 -10  -4  -1  146.22   11.12
 -10  -4  -1  138.42   13.00
 -10   4  -1  131.76   13.01
 -10  -4  -1  146.69   10.76
 -10  -4  -1  135.54   10.50
 -10  -4  -1  155.16   13.65
 -10  -4  -1  134.84   11.27
 -10   4  -1  143.41   13.88
 -10  -4  -1  127.20   11.41
  10  -4   1  113.59   10.89
  11   4   1   15.75    2.93
  11  -4   1   12.15    4.24
 -11  -4  -1   14.23    4.23
 -11  -4  -1   21.01    6.34
 -11  -4  -1   22.80    6.37
 -11   4  -1   15.09    5.96
 -11   4  -1    8.16    5.02
 -11   4  -1   11.07    5.29
 -11  -4  -1    3.95    4.28
  11  -4   1   11.89    4.95
 -11  -4  -1   12.98    4.91
 -11  -4  -1   10.98    4.72
  11  -4   1   14.69    5.21
 -11   4  -1   10.97    5.22
 -12  -4  -1   20.38    5.52
 -12  -4  -1   22.17    6.23
 -12  -4  -1   40.11    8.40
 -12   4  -1   27.40    7.53
 -12   4  -1   23.89    6.78
 -12  -4  -1   42.86    8.05
 -12   4  -1   30.61    7.45
  12   4   1   25.66    3.76
  12  -4   1   39.86    7.76
 -12  -4  -1   33.11    6.95
 -12  -4  -1   29.79    7.59
  12  -4   1   29.49    5.78
 -12   4  -1   28.92    8.33
  12  -4   1   33.84    7.09
  12   4   1   30.66    5.90
  13   4   1    9.38    2.84
 -13   4  -1   16.93    6.30
  13  -4   1    6.86    4.89
 -13  -4  -1   10.27    5.52
 -13  -4  -1    6.81    5.34
  13  -4   1   14.09    5.58
 -13   4  -1    9.73    5.65
 -13  -4  -1   -1.72    4.89
 -13  -4  -1   18.57    5.32
  13  -4   1   12.29    4.45
 -13  -4  -1   10.82    5.67
 -13  -4  -1    8.59    5.46
 -13   4  -1    1.88    4.40
 -13   4  -1   13.69    6.22
 -14  -4  -1    5.35    5.05
 -14  -4  -1    1.06    5.00
  14  -4   1   -0.01    3.67
  14   4   1    1.05    2.85
 -14  -4  -1   -0.99    4.93
 -14   4  -1    0.53    5.42
 -14  -4  -1   -3.03    4.66
 -14  -4  -1    7.07    5.84
  14  -4   1    0.33    5.01
 -14   4  -1   -2.87    4.46
 -14   4  -1    2.19    4.60
 -14   4  -1   -1.45    4.25
 -15   4  -1   12.66    6.74
 -15  -4  -1   13.65    7.34
 -15   4  -1   -6.71    4.61
 -15  -4  -1    1.09    5.51
 -15  -4  -1    2.57    5.46
  15   4   1    8.55    3.68
 -15  -4  -1   11.31    6.31
 -15  -4  -1   14.25    6.85
 -15   4  -1    5.65    5.89
  15  -4   1    5.78    4.52
 -16   5   1   18.03    7.66
 -16  -5   1    4.68    5.98
 -16  -5   1    4.88    5.88
 -16  -5   1    7.03    7.72
 -16   5   1    6.59    6.58
  16  -5  -1    2.19    5.82
 -16   5   1   -0.41    5.12
 -15  -5   1    1.05    5.46
 -15   5   1    4.19    5.47
 -15   5   1   -0.31    5.57
  15   5  -1    1.86    3.86
 -15  -5   1   -1.46    4.94
 -15  -5   1   -3.95    4.91
 -15  -5   1   -1.54    5.35
  15  -5  -1   -3.81    5.68
  15  -5  -1   -2.92    4.16
 -15   5   1   -5.38    3.54
 -15  -5   1    8.98    6.89
  15  -5  -1   -0.73    5.09
 -14   5   1   -3.42    4.01
 -14   5   1   -0.54    3.83
 -14  -5   1    1.94    4.96
 -14   5   1    3.02    5.03
  14  -5  -1    2.35    4.17
 -14  -5   1    1.63    4.73
 -14  -5   1    6.42    5.14
 -14   5   1    4.94    5.03
  14  -5  -1   -0.67    5.25
 -14  -5   1    2.55    5.40
  14   5  -1   -1.14    3.35
 -14  -5   1   -5.42    4.32
  14  -5  -1    5.98    5.08
 -13   5   1    3.31    4.64
  13  -5  -1    1.97    4.26
 -13  -5   1    5.61    4.81
  13  -5  -1    7.51    5.33
 -13  -5   1   10.21    5.81
 -13   5   1    7.83    5.05
 -13   5   1   10.21    5.53
 -13  -5   1    8.25    4.09
 -13  -5   1    6.04    4.92
  13   5  -1    6.11    3.58
 -13  -5   1    2.84    4.55
  13   5  -1   11.52    4.73
 -13  -5   1   13.61    6.43
 -13   5   1    2.20    4.70
  13  -5  -1    4.76    4.78
 -12  -5   1    7.22    4.22
 -12   5   1    1.26    4.44
  12  -5  -1    8.65    5.02
 -12  -5   1   15.64    6.05
  12  -5  -1    8.60    4.51
 -12   5   1    6.76    5.13
  12  -5  -1   14.82    5.84
  12   5  -1    7.72    3.61
 -12  -5   1    6.75    4.68
 -12   5   1    1.76    4.63
  12   5  -1   15.89    4.76
 -12  -5   1    6.99    5.02
 -12  -5   1    7.01    4.27
 -12  -5   1    4.17    4.00
 -12   5   1    6.01    4.70
 -11  -5   1   38.73    8.47
 -11   5   1   27.32    7.32
  11  -5  -1   40.89    7.43
 -11   5   1   38.65    8.45
 -11   5   1   32.17    7.21
 -11  -5   1   48.44    7.55
 -11  -5   1   29.51    5.71
  11  -5  -1   57.88    8.74
 -11   5   1   30.52    7.74
 -11  -5   1   45.15    7.28
  11   5  -1   53.34    6.88
  11  -5  -1   34.57    6.41
 -11  -5   1   29.53    6.34
 -11  -5   1   33.81    8.01
  11   5  -1   42.05    5.65
 -10  -5   1   83.59    9.18
 -10  -5   1   73.08    8.23
 -10   5   1   89.45   11.06
  10  -5  -1   95.51    9.19
  10   5  -1   81.31    8.40
 -10   5   1   87.46    9.93
 -10  -5   1   90.54    9.16
 -10   5   1   98.97   11.07
 -10  -5   1  109.79   11.95
  10   5  -1   86.87    8.03
  10  -5  -1   88.62   10.02
 -10  -5   1   94.70   11.09
  10  -5  -1  106.41   10.28
 -10   5   1   95.44   11.12
 -10  -5   1   81.27    9.00
  -9  -5   1  149.40   11.59
  -9   5   1  161.59   13.24
   9   5  -1  186.67   11.57
   9  -5  -1  147.62   12.10
  -9   5   1  163.25   12.96
  -9  -5   1  164.12   11.63
   9  -5  -1  141.09   12.17
   9  -5  -1  157.80   11.87
  -9  -5   1  158.65   11.39
  -9  -5   1  179.67   11.83
  -9  -5   1  169.99   13.65
  -9   5   1  169.79    9.13
  -9   5   1  153.63   13.11
  -9   5   1  160.56   12.63
   9   5  -1  186.46   12.09
  -9  -5   1  162.71   14.31
  -8  -5   1   52.36    8.23
   8   5  -1   51.49    6.20
  -8   5   1   82.22    9.17
   8  -5  -1   60.59    6.82
  -8   5   1   51.30    4.68
  -8   5   1   47.89    6.88
  -8   5   1   55.06    7.89
   8   5  -1   45.76    5.61
  -8  -5   1   68.82    7.04
  -8  -5   1   57.84    8.61
   8  -5  -1   66.28    7.99
   8  -5  -1   52.29    5.65
  -8  -5   1   58.32    6.48
  -8  -5   1   60.08    6.55
  -8   5   1   69.20    8.72
   8  -5  -1   62.72    7.67
  -8  -5   1   62.93    6.95
   7   5  -1   20.55    4.03
   7  -5  -1   24.23    5.17
  -7   5   1   21.36    3.09
  -7   5   1   16.52    2.72
  -7  -5   1   23.35    4.42
  -7   5   1   18.64    4.80
  -7  -5   1   21.80    4.12
   7   5  -1   26.78    4.47
  -7  -5   1   25.50    4.31
  -7  -5   1   22.23    5.35
   7  -5  -1   18.82    4.68
  -7   5   1   23.71    4.82
  -7  -5   1   24.26    5.75
  -7  -5   1   22.77    4.00
   7  -5  -1   15.91    3.51
  -7   5   1   20.56    5.24
  -7   5   1   18.62    4.95
   7  -5  -1   27.79    4.74
   6  -5  -1   12.14    3.86
  -6   5   1   13.92    4.06
  -6   5   1   19.70    2.89
   6  -5  -1   15.12    3.76
  -6   5   1   12.56    3.44
   6   5  -1   14.74    3.66
  -6  -5   1   11.45    2.87
  -6   5   1   12.81    1.75
  -6  -5   1   14.48    3.54
  -6  -5   1   13.48    4.29
   6  -5  -1   20.36    4.54
  -6   5   1   17.59    3.09
   6   5  -1   11.69    3.26
  -6   5   1   13.71    4.82
  -6  -5   1   18.02    4.86
   6   5  -1    8.64    2.80
  -6   5   1   22.44    4.72
  -6  -5   1    9.74    2.84
  -6   5   1   20.39    4.71
   6  -5  -1   16.49    3.16
   6  -5  -1   20.84    4.52
  -6  -5   1   11.23    2.98
  -5  -5   1   17.42    3.83
   5  -5  -1   19.86    3.25
  -5   5   1   20.32    2.28
  -5   5   1   21.47    4.50
   5  -5  -1   21.44    4.51
  -5  -5   1   26.46    4.92
  -5   5   1   21.38    3.52
   5   5  -1   26.29    3.89
   5  -5  -1   20.79    4.52
  -5   5   1   32.89    5.08
  -5  -5   1   19.63    3.18
  -5   5   1   26.66    4.74
   5  -5  -1   33.43    5.24
  -5   5   1   27.35    5.59
  -5  -5   1   18.98    3.23
  -5  -5   1   25.86    3.48
  -5   5   1   13.41    2.64
   5   5  -1   19.92    3.73
   5  -5  -1   18.20    3.64
   5   5  -1   16.76    4.03
  -5  -5   1   19.31    4.57
  -5   5   1   17.05    3.82
  -4   5   1   14.44    3.20
  -4  -5   1   13.80    4.03
  -4   5   1   12.24    1.98
  -4  -5   1   16.71    2.77
   4  -5  -1   14.83    3.70
   4   5  -1   14.11    3.57
   4  -5  -1   14.87    3.60
  -4  -5   1   15.24    3.44
   4  -5  -1   13.02    2.71
  -4   5   1   13.80    3.55
  -4  -5   1   16.07    2.68
   4   5  -1   15.26    2.65
  -4   5   1   12.76    4.02
  -4   5   1   16.29    3.64
   4  -5  -1   11.46    3.54
   4  -5  -1   10.53    2.94
  -4   5   1   15.29    3.12
  -4   5   1   14.55    3.60
   4   5  -1   17.99    3.45
   4   5  -1   14.42    3.19
  -4  -5   1    9.64    3.41
  -4  -5   1   15.08    2.66
  -4   5   1   12.54    2.50
  -3   5   1    0.42    1.01
   3   5  -1    1.44    1.92
   3  -5  -1    0.47    1.73
   3  -5  -1    2.91    2.06
   3  -5  -1    0.02    2.12
   3   5  -1   -0.97    1.27
   3   5  -1    0.61    1.98
  -3   5   1    1.08    1.28
   3   5  -1    0.01    1.64
  -3  -5   1   -1.35    1.95
   3  -5  -1    1.58    2.02
  -3   5   1    2.34    1.70
   3  -5  -1    1.89    2.00
  -3   5   1   -0.13    2.41
  -3  -5   1   -0.07    0.92
  -3  -5   1   -1.25    1.71
  -3  -5   1    2.80    1.91
  -3   5   1    1.59    1.92
  -3  -5   1    1.56    1.36
   3  -5  -1    1.06    1.69
   2   5  -1   74.00    5.73
  -2  -5   1   79.09    6.03
  -2  -5   1   68.18    6.87
   2  -5  -1   75.68    6.83
  -2  -5   1   68.03    5.10
  -2   5   1   68.54    5.15
   2  -5  -1   77.98    7.06
   2   5  -1   73.48    5.97
  -2  -5   1   67.20    5.04
  -2   5   1   65.30    6.00
   2  -5  -1   78.61    5.59
  -2  -5   1   80.93    5.96
  -2  -5   1   81.62    7.14
   2   5  -1   90.15    7.85
  -2  -5   1   80.24    4.54
   2  -5  -1   76.84    6.08
   2  -5  -1   71.24    5.05
  -2   5   1   65.40    7.40
  -2  -5   1   64.08    4.11
  -2   5   1   77.29    5.31
   2  -5  -1   70.82    5.95
  -2   5   1   76.09    5.30
   1   5  -1    0.02    1.20
  -1  -5   1    1.79    1.81
  -1  -5   1    2.84    1.65
  -1  -5   1    1.64    1.59
  -1   5   1    1.21    2.29
   1  -5  -1    3.17    1.71
   1   5  -1    1.19    2.29
   1  -5  -1   -0.69    1.69
   1  -5  -1    3.59    2.31
  -1  -5   1    1.58    1.26
   1  -5  -1    1.67    1.49
   1  -5  -1   -1.55    1.26
  -1   5   1   -1.67    1.64
  -1  -5   1    2.04    1.73
  -1   5   1   -0.29    1.13
   1  -5  -1   -0.34    1.56
  -1  -5   1    2.69    2.32
   1   5  -1    0.23    1.88
  -1   5   1    2.69    1.35
   1  -5  -1    1.27    1.65
  -1  -5   1    0.75    1.83
   0  -5   1  190.12   10.76
   0   5  -1  185.51   10.71
   0  -5  -1  197.55   11.10
   0  -5  -1  200.77   10.77
   0  -5  -1  171.02   11.61
   0  -5   1  183.69   11.69
   0  -5   1  197.03   10.88
   0  -5   1  200.42   11.73
   0  -5  -1  204.12   11.35
   0  -5   1  192.21   11.42
   0  -5  -1  173.94    9.68
   0  -5  -1  178.32   11.48
   0  -5   1  199.75   11.12
   0   5   1  196.01   10.99
   0  -5  -1  195.94    9.64
   0   5   1  202.96   12.92
   0  -5   1  182.93    9.87
   0   5  -1  194.48   10.45
   0  -5  -1  192.30   10.86
   0   5  -1  203.82   11.22
  -1   5  -1    6.79    3.15
   1  -5   1    5.20    2.22
  -1   5  -1    7.99    2.04
  -1   5  -1    9.42    2.18
   1  -5   1    6.50    2.03
  -1  -5  -1    9.68    2.35
   1   5   1   15.22    2.85
  -1  -5  -1    4.09    1.03
  -1  -5  -1   11.93    3.16
   1  -5   1    7.74    2.65
  -1   5  -1   12.75    2.32
  -1  -5  -1   11.73    1.46
   1   5   1    8.56    3.03
   1  -5   1   18.35    3.34
  -1   5  -1    9.56    2.66
  -1  -5  -1    4.98    1.84
   1  -5   1   13.36    3.31
   1  -5   1   16.74    3.53
  -1  -5  -1   14.20    3.45
  -1  -5  -1   11.08    1.71
  -1   5  -1   12.23    2.47
  -1  -5  -1   11.54    2.79
  -1  -5  -1   12.61    2.90
  -2   5  -1   62.31    5.66
  -2  -5  -1   63.42    6.96
   2  -5   1   73.72    5.40
  -2  -5  -1   85.53    6.54
  -2  -5  -1   82.21    7.38
   2   5   1   68.31    6.97
   2  -5   1   78.74    6.48
  -2  -5  -1   70.61    4.42
  -2   5  -1   89.65    8.36
   2  -5   1   74.42    6.65
   2   5   1   76.88    5.46
  -2  -5  -1   73.76    6.46
   2   5   1   77.81    6.18
  -2   5  -1   84.58    5.56
   2  -5   1   85.99    6.98
  -2  -5  -1   82.39    4.80
   2  -5   1   75.68    6.51
  -2   5  -1   77.28    5.63
   2  -5   1   65.69    6.53
  -2   5  -1   89.75    6.43
  -3  -5  -1    9.56    2.89
  -3   5  -1   16.10    3.72
  -3   5  -1   10.32    3.35
  -3   5  -1    9.24    3.55
  -3   5  -1   12.13    3.11
   3  -5   1    2.34    1.93
  -3   5  -1   14.78    2.36
  -3   5  -1    9.20    2.19
   3  -5   1   14.76    2.74
   3   5   1   11.84    3.16
   3  -5   1    6.58    2.65
  -3  -5  -1   19.42    4.24
  -3   5  -1   16.77    3.14
  -3  -5  -1   13.71    2.07
   3  -5   1   15.88    3.38
  -3  -5  -1   15.69    3.33
   3  -5   1   12.23    3.23
  -3  -5  -1    9.20    3.05
   3   5   1   12.46    2.81
   3  -5   1   21.52    3.86
  -4   5  -1   72.87    7.13
  -4  -5  -1   76.43    6.85
  -4  -5  -1   69.60    7.63
  -4  -5  -1   61.58    6.31
   4  -5   1   81.37    6.94
  -4   5  -1   62.75    4.68
  -4   5  -1   68.91    7.93
  -4   5  -1   67.04    6.56
  -4   5  -1   71.01    5.35
  -4  -5  -1   68.14    7.51
  -4   5  -1   65.85    6.91
   4   5   1   60.98    6.15
   4   5   1   67.74    5.45
   4  -5   1   74.55    6.93
   4  -5   1   61.86    5.16
  -4   5  -1   68.93    5.43
   4  -5   1   58.41    6.37
  -4  -5  -1   68.26    5.00
   4  -5   1   76.78    7.08
   4  -5   1   53.45    6.61
  -5  -5  -1   99.78    9.56
  -5  -5  -1  102.58    6.75
   5  -5   1   94.60    8.31
   5  -5   1  104.54    8.24
  -5   5  -1   84.66    8.58
   5  -5   1  111.27    9.56
   5   5   1  100.37    6.85
  -5   5  -1   88.18    8.32
   5  -5   1   95.57    6.74
  -5   5  -1   88.11    8.55
  -5  -5  -1   97.48    6.77
  -5  -5  -1  103.77    6.76
   5   5   1   95.93    7.55
   5  -5   1  100.65    7.91
  -5   5  -1   97.08    9.51
  -5  -5  -1   90.98    8.12
  -5  -5  -1   99.19    7.99
  -5   5  -1   95.36    6.11
   5  -5   1   98.07    7.86
  -5   5  -1   86.21    6.24
  -5  -5  -1  118.00    9.95
  -5   5  -1   93.12    6.47
   6  -5   1   31.62    5.20
   6  -5   1   32.32    5.14
  -6  -5  -1   31.17    5.04
   6   5   1   37.24    3.96
   6  -5   1   41.61    5.56
  -6  -5  -1   32.96    5.12
  -6   5  -1   36.72    3.84
  -6   5  -1   43.11    6.18
  -6   5  -1   24.68    5.19
   6   5   1   39.88    4.70
   6  -5   1   34.29    4.16
  -6   5  -1   30.52    5.84
  -6   5  -1   23.20    2.98
  -6  -5  -1   38.95    6.43
  -6  -5  -1   38.86    6.29
  -6   5  -1   33.54    6.15
  -6  -5  -1   37.23    4.49
  -6  -5  -1   28.31    4.19
  -6  -5  -1   31.61    4.30
  -7  -5  -1    2.93    2.81
  -7  -5  -1   -0.71    2.86
  -7   5  -1    8.11    4.19
  -7   5  -1   -0.62    1.15
  -7  -5  -1    1.24    2.49
   7  -5   1    0.69    2.46
  -7   5  -1    1.77    3.03
  -7   5  -1    0.63    3.18
   7  -5   1    0.88    2.91
   7   5   1    0.65    1.96
   7  -5   1    1.56    2.67
  -7   5  -1    2.66    2.91
   7   5   1    1.59    2.20
  -7  -5  -1   -0.01    2.28
   7  -5   1    2.62    2.88
  -7  -5  -1    4.65    3.04
  -7  -5  -1    2.44    3.35
  -7  -5  -1   -1.34    2.24
  -8  -5  -1    7.69    4.46
  -8   5  -1    4.86    3.85
  -8  -5  -1    7.10    3.29
   8  -5   1   14.84    4.26
  -8   5  -1    4.74    3.82
   8   5   1    6.30    2.59
  -8  -5  -1    6.24    3.19
  -8   5  -1    6.29    3.87
  -8   5  -1   11.28    4.61
  -8  -5  -1    4.32    3.66
   8  -5   1    7.08    3.89
  -8  -5  -1   13.65    3.82
  -8  -5  -1    5.45    3.28
   8  -5   1    6.67    3.67
  -8  -5  -1    7.15    3.48
  -8   5  -1    4.80    1.65
  -9  -5  -1   63.85    7.95
  -9  -5  -1   77.35    8.23
  -9   5  -1   84.40   10.63
   9  -5   1   79.45    8.84
  -9  -5  -1  107.96   11.13
  -9  -5  -1   92.04   10.45
  -9   5  -1   67.95    9.67
  -9  -5  -1   68.87    8.10
   9   5   1   82.79    6.56
  -9   5  -1   88.09   10.61
   9  -5   1   83.77    8.81
  -9  -5  -1   87.90    8.77
  -9   5  -1   74.00    9.52
  -9  -5  -1   94.16    8.94
   9  -5   1   78.48    8.84
 -10  -5  -1   70.12    8.78
 -10  -5  -1   64.81    9.98
 -10  -5  -1   88.87    9.47
  10  -5   1  110.32   10.19
 -10   5  -1   88.17   11.46
 -10  -5  -1   92.77    9.32
 -10   5  -1   63.69    9.65
 -10   5  -1   74.77   10.42
 -10  -5  -1  119.94   11.93
 -10   5  -1   80.54   10.77
 -10  -5  -1   82.93    9.38
  10   5   1   99.04    7.21
  10  -5   1   90.07    9.79
  10  -5   1   89.15    9.20
 -11   5  -1   27.35    7.15
 -11  -5  -1   25.77    6.14
  11   5   1   27.25    4.27
 -11  -5  -1   22.01    5.47
 -11  -5  -1   29.56    6.69
 -11   5  -1   38.06    8.54
  11  -5   1   39.73    7.44
 -11   5  -1   35.93    7.95
 -11  -5  -1   27.15    7.65
  11  -5   1   49.98    7.04
  11   5   1   41.39    6.60
 -11  -5  -1   23.43    6.08
 -11   5  -1   28.11    7.30
 -11  -5  -1   38.77    8.32
  11  -5   1   30.64    6.82
  12   5   1    2.81    3.59
 -12   5  -1    1.50    4.44
 -12   5  -1    3.99    5.07
 -12   5  -1   -7.04    3.22
 -12  -5  -1    3.49    3.93
 -12  -5  -1    3.81    4.63
 -12  -5  -1    2.83    4.61
  12   5   1    5.78    3.05
 -12  -5  -1   15.41    6.44
  12  -5   1    5.41    3.87
 -12  -5  -1    5.55    5.01
 -12  -5  -1    3.19    4.12
 -12   5  -1    3.79    4.71
  12  -5   1    3.81    4.60
  12  -5   1    0.69    4.93
 -13  -5  -1   -2.48    4.76
  13   5   1    0.36    2.86
  13  -5   1   -3.15    4.07
 -13  -5  -1   -3.95    3.62
 -13   5  -1    2.29    4.90
 -13  -5  -1    5.27    5.33
  13  -5   1    3.59    3.99
 -13  -5  -1   15.34    6.20
 -13  -5  -1    0.84    4.61
 -13   5  -1   -2.04    4.59
 -13   5  -1    6.46    5.71
 -13  -5  -1    6.43    5.76
  13   5   1    2.53    3.78
 -13   5  -1    9.34    5.44
 -14   5  -1   -4.02    4.34
  14   5   1    4.31    3.28
 -14  -5  -1    6.62    5.56
 -14  -5  -1   11.10    6.24
 -14   5  -1    4.26    5.18
 -14  -5  -1    3.45    6.54
 -14  -5  -1   -0.38    4.91
 -14   5  -1    6.53    6.49
 -14  -5  -1    4.41    6.01
  14  -5   1   -0.85    4.12
 -14   5  -1    4.45    5.63
 -15  -5  -1    2.08    6.01
 -15   5  -1   13.82    7.45
  15   5   1    2.29    3.85
 -15  -5  -1   11.42    6.89
 -15   5  -1    4.10    5.93
 -15  -5  -1   -1.63    6.26
 -15   5  -1    2.68    5.31
 -15   6   1   10.37    7.10
 -15  -6   1    7.55    6.58
 -15   6   1   18.40    8.11
  15   6  -1   12.78    5.58
 -15   6   1    7.97    6.08
  15  -6  -1   16.45    7.68
  15  -6  -1   14.03    6.94
 -15  -6   1   10.59    6.55
  15  -6  -1    7.72    5.30
 -15  -6   1   10.81    7.03
 -14  -6   1   27.27    7.70
 -14  -6   1    9.51    6.00
 -14   6   1   14.76    7.47
 -14  -6   1    3.76    5.97
  14  -6  -1   10.32    5.43
 -14  -6   1   12.76    5.45
 -14   6   1   10.71    6.10
 -14  -6   1   19.27    7.59
  14   6  -1    6.08    4.42
  14  -6  -1    8.29    6.48
 -14   6   1   21.20    7.99
 -14   6   1   23.77    7.69
  14  -6  -1   26.32    8.33
 -14  -6   1    7.70    6.08
 -13  -6   1   -0.75    4.53
 -13   6   1    3.58    5.03
  13   6  -1   -1.77    3.40
  13  -6  -1    1.67    5.10
 -13   6   1   -4.42    4.42
 -13  -6   1    3.54    4.58
 -13  -6   1   -1.08    4.39
 -13   6   1    4.25    5.17
  13  -6  -1    0.68    4.99
 -13  -6   1    1.00    5.14
 -13   6   1   -0.57    4.15
 -13  -6   1   -3.74    4.41
 -13  -6   1   -3.27    3.31
  13   6  -1    4.62    3.88
  13  -6  -1   -0.83    4.26
 -12   6   1    6.86    5.46
 -12  -6   1   11.99    5.25
  12   6  -1   12.62    4.82
 -12   6   1   21.18    7.18
 -12  -6   1    6.41    4.58
  12  -6  -1    4.54    4.94
 -12  -6   1    8.95    5.90
  12   6  -1   16.37    4.67
 -12   6   1    2.28    4.99
  12  -6  -1   47.57    8.43
 -12  -6   1    5.77    4.68
 -12  -6   1   15.50    5.71
 -12   6   1    1.62    3.95
 -12  -6   1   18.00    6.75
  12  -6  -1   15.51    5.46
  11   6  -1   83.21    9.21
 -11  -6   1   68.03   11.10
 -11  -6   1   89.50    9.79
  11  -6  -1   75.11   10.49
  11   6  -1   78.30    8.32
 -11   6   1   97.48   11.92
  11  -6  -1  108.69   11.29
 -11  -6   1   70.76    9.17
 -11  -6   1   80.78    9.57
  11  -6  -1   76.89    9.30
 -11   6   1   81.64   11.49
 -11   6   1   73.52   10.21
 -11   6   1   88.97   11.58
 -11  -6   1   81.36   11.09
 -10  -6   1    8.29    5.53
  10  -6  -1    3.71    4.47
 -10   6   1    5.52    4.13
 -10  -6   1    7.31    4.01
  10   6  -1    3.66    3.38
 -10  -6   1    8.31    4.11
 -10   6   1    9.53    2.31
 -10  -6   1    5.54    4.00
 -10   6   1    5.29    4.75
  10  -6  -1    0.54    4.26
 -10   6   1    4.21    4.41
 -10  -6   1   11.87    5.43
 -10  -6   1    2.62    3.29
 -10   6   1    6.54    4.67
  10  -6  -1    4.73    3.81
  10   6  -1    5.73    4.00
   9  -6  -1   27.68    6.34
  -9  -6   1   21.52    6.39
  -9  -6   1   14.31    4.78
  -9   6   1   25.90    6.11
   9   6  -1   29.75    5.53
  -9   6   1   25.59    6.55
  -9  -6   1   44.60    6.08
   9  -6  -1   32.08    6.54
  -9   6   1   28.35    6.85
  -9   6   1   32.39    3.87
  -9   6   1   24.01    6.29
  -9  -6   1   23.99    5.29
  -9  -6   1   29.30    7.05
   9  -6  -1   21.98    5.23
  -9  -6   1   36.33    5.83
   9   6  -1   22.14    4.90
  -8  -6   1   14.50    4.10
   8  -6  -1   11.79    4.09
  -8   6   1   14.47    5.08
  -8  -6   1    9.38    3.43
   8  -6  -1   11.36    3.79
  -8   6   1   15.40    4.71
  -8  -6   1   13.48    5.32
  -8  -6   1    8.08    4.61
  -8   6   1    9.81    2.16
  -8   6   1   14.61    5.30
   8  -6  -1   14.05    4.76
  -8  -6   1   13.76    4.35
   8   6  -1    9.50    3.71
   8  -6  -1    5.01    3.90
  -8   6   1   11.34    2.77
  -8  -6   1   16.80    4.05
  -8   6   1    8.54    4.04
   8   6  -1    4.62    2.92
  -7  -6   1  247.39   14.13
   7  -6  -1  245.61   13.79
  -7  -6   1  246.06   13.88
  -7  -6   1  259.51   17.36
   7  -6  -1  230.23   15.75
  -7   6   1  245.26   16.10
  -7   6   1  221.52   15.30
  -7   6   1  250.58   13.17
  -7   6   1  220.11   12.99
  -7   6   1  264.30   16.07
  -7  -6   1  236.99   14.98
  -7   6   1  218.20   15.27
  -7  -6   1  194.12   15.52
   7  -6  -1  241.94   15.49
   7   6  -1  266.32   15.93
  -7  -6   1  254.10   14.47
   7  -6  -1  242.78   15.64
   7   6  -1  245.86   15.18
  -6   6   1   34.57    6.03
  -6   6   1   35.98    4.60
  -6   6   1   33.49    5.89
  -6  -6   1   38.56    4.61
   6   6  -1   29.52    4.90
  -6   6   1   41.81    5.75
  -6  -6   1   34.57    4.55
  -6  -6   1   29.51    5.29
  -6  -6   1   20.05    5.36
   6  -6  -1   38.28    6.27
  -6  -6   1   31.91    4.43
  -6   6   1   44.82    6.41
   6  -6  -1   28.07    4.98
   6   6  -1   40.03    5.93
  -6   6   1   27.92    3.87
   6  -6  -1   33.56    6.05
   6  -6  -1   27.33    4.38
   6  -6  -1   43.08    6.56
  -6  -6   1   20.86    5.66
  -5   6   1  176.13   11.82
  -5   6   1  195.30   12.38
  -5   6   1  186.26   10.77
   5  -6  -1  189.66   12.41
  -5   6   1  188.16    9.94
  -5   6   1  186.10   12.15
  -5   6   1  195.82   14.41
   5   6  -1  167.24   11.67
  -5  -6   1  177.22   10.48
   5  -6  -1  165.83   12.14
  -5  -6   1  179.45   10.84
  -5  -6   1  172.95   11.88
  -5   6   1  179.15   11.33
  -5  -6   1  174.47   13.30
  -5  -6   1  217.57   11.07
   5  -6  -1  163.53   12.29
   5   6  -1  188.22   13.00
   5  -6  -1  192.40   10.85
  -5  -6   1  169.23   12.89
   4   6  -1  342.45   20.83
  -4  -6   1  333.45   19.05
  -4  -6   1  385.40   17.92
   4  -6  -1  363.18   18.08
  -4  -6   1  357.00   20.94
   4  -6  -1  342.18   19.44
  -4   6   1  358.54   19.01
   4   6  -1  349.02   19.48
  -4  -6   1  356.26   15.82
  -4   6   1  362.96   22.14
  -4   6   1  361.14   17.69
  -4  -6   1  359.19   17.57
  -4   6   1  340.14   19.01
  -4   6   1  361.81   18.06
  -4  -6   1  371.72   18.30
   4   6  -1  391.50   18.22
   4  -6  -1  364.35   20.07
   4  -6  -1  335.04   19.40
  -4   6   1  364.30   18.94
   4  -6  -1  345.99   19.60
  -4   6   1  356.90   19.25
  -4  -6   1  326.67   20.16
   4  -6  -1  371.84   20.38
   3  -6  -1   73.98    5.44
  -3  -6   1   55.27    4.83
  -3   6   1   60.40    5.55
  -3   6   1   74.22    8.54
   3  -6  -1   49.01    6.67
  -3   6   1   64.89    6.50
   3   6  -1   73.72    6.17
  -3   6   1   68.45    5.21
  -3  -6   1   64.64    4.61
  -3   6   1   62.24    5.80
  -3  -6   1   68.62    6.60
  -3  -6   1   71.15    5.16
   3  -6  -1   62.13    6.40
  -3  -6   1   65.77    5.21
   3  -6  -1   67.52    7.23
  -3  -6   1   52.14    7.08
  -3   6   1   81.07    6.12
   3  -6  -1   69.24    6.91
  -3  -6   1   68.60    5.75
   3   6  -1   53.83    7.21
   3   6  -1   66.69    6.36
  -3   6   1   63.52    6.04
   3  -6  -1   69.21    6.25
  -3  -6   1   55.46    7.18
   3  -6  -1   78.75    5.59
   2  -6  -1    7.72    2.32
  -2   6   1    4.23    3.20
   2   6  -1    8.54    3.04
  -2   6   1    7.41    2.21
  -2  -6   1    6.80    2.18
   2  -6  -1    8.66    2.90
   2   6  -1    6.90    3.16
  -2  -6   1    7.04    1.63
  -2  -6   1    6.62    1.82
  -2  -6   1    5.47    2.17
   2  -6  -1   10.77    3.52
   2  -6  -1   10.12    2.89
  -2  -6   1    6.50    2.26
  -2  -6   1    3.86    2.50
  -2  -6   1    6.90    3.17
  -2   6   1    5.47    2.02
   2   6  -1    7.45    2.76
  -2   6   1    9.74    3.24
  -2  -6   1    8.85    2.73
   2  -6  -1   14.58    3.08
  -2  -6   1    5.76    3.24
  -2  -6   1    5.88    2.13
  -2   6   1    7.25    2.32
   2  -6  -1    8.64    3.52
   2  -6  -1    7.89    2.56
  -1   6   1   16.96    2.94
  -1  -6   1   19.63    3.74
  -1  -6   1   20.92    3.56
   1   6  -1   23.56    5.17
   1  -6  -1   15.17    3.37
   1   6  -1   19.93    3.48
  -1  -6   1   17.62    3.58
   1  -6  -1   19.92    3.59
   1   6  -1   16.33    3.06
   1  -6  -1   25.87    4.79
   1   6  -1   22.26    3.86
   1  -6  -1   17.19    4.13
  -1  -6   1   24.24    4.73
   1  -6  -1   18.41    2.73
  -1   6   1   15.64    3.02
  -1  -6   1   15.87    2.94
   1  -6  -1   21.14    3.75
  -1  -6   1   16.94    4.14
   1  -6  -1   14.92    2.63
  -1   6   1   18.77    2.72
  -1   6   1   20.49    5.10
  -1  -6   1   31.51    3.57
  -1   6   1   14.12    3.70
  -1  -6   1   22.23    2.64
   0  -6  -1   11.07    3.02
   0  -6  -1    9.59    2.56
   0  -6   1   12.61    3.44
   0  -6  -1   12.46    3.89
   0  -6   1   13.52    3.20
   0   6  -1   11.59    2.62
   0  -6   1    9.85    2.72
   0   6   1   17.06    3.53
   0  -6   1   12.74    3.57
   0   6  -1    8.34    3.00
   0   6   1   14.74    2.93
   0   6  -1   12.28    2.66
   0  -6  -1    7.96    2.73
   0  -6   1   16.32    3.14
   0  -6   1   13.12    2.88
   0  -6  -1   11.61    2.15
   0  -6  -1    6.41    1.95
   0   6  -1    4.52    2.83
   0   6   1   10.46    2.43
   0  -6  -1   11.33    3.64
   0  -6   1    8.77    3.10
   0   6   1   16.88    4.53
   0  -6   1    6.56    2.61
   0  -6   1    6.51    2.06
   1   6   1  632.92   30.29
   1  -6   1  590.16   31.22
  -1   6  -1  633.97   29.30
   1  -6   1  638.89   30.36
  -1   6  -1  603.26   30.56
   1  -6   1  668.62   29.92
  -1  -6  -1  605.30   28.91
  -1  -6  -1  651.78   28.96
  -1  -6  -1  637.14   27.87
  -1   6  -1  633.54   30.24
  -1  -6  -1  637.99   28.00
  -1  -6  -1  634.15   31.23
   1  -6   1  619.67   30.62
   1   6   1  677.06   33.67
  -1   6  -1  614.63   29.27
  -1  -6  -1  630.05   30.26
  -1  -6  -1  640.66   32.03
   1  -6   1  617.96   30.58
  -1  -6  -1  625.93   31.14
   1  -6   1  634.67   29.28
   1  -6   1  663.79   32.39
   1  -6   1  653.21   30.10
  -1   6  -1  626.72   34.07
  -1   6  -1  626.59   30.22
   2   6   1   10.76    3.22
  -2   6  -1   12.69    3.17
  -2   6  -1   19.75    3.86
   2   6   1   11.49    2.98
  -2   6  -1   16.31    3.12
  -2  -6  -1   21.06    3.99
  -2   6  -1   12.25    4.51
  -2  -6  -1   13.64    2.19
   2  -6   1    8.20    3.12
  -2  -6  -1   18.76    2.38
  -2   6  -1   19.28    3.01
  -2   6  -1   16.96    2.87
  -2  -6  -1   12.35    3.61
   2  -6   1   17.01    4.16
  -2  -6  -1    7.49    2.91
   2  -6   1   22.85    4.18
  -2  -6  -1   15.75    4.08
   2  -6   1   16.60    3.74
   2   6   1   12.35    3.90
   2  -6   1   18.47    3.04
   2  -6   1   15.74    3.52
   2  -6   1   17.45    3.89
   2  -6   1    7.60    3.51
  -3   6  -1  348.47   16.82
   3  -6   1  342.67   18.32
   3  -6   1  330.28   18.96
   3  -6   1  338.79   16.70
  -3  -6  -1  332.72   19.43
   3   6   1  341.36   19.55
  -3   6  -1  337.63   16.95
  -3  -6  -1  297.71   18.55
  -3  -6  -1  316.88   18.18
  -3   6  -1  328.40   17.77
   3  -6   1  298.80   17.63
  -3   6  -1  328.28   16.21
   3  -6   1  316.65   18.28
  -3   6  -1  309.90   17.68
  -3  -6  -1  307.85   17.70
  -3   6  -1  335.52   20.62
  -3  -6  -1  326.35   16.00
   3  -6   1  324.64   18.39
  -3   6  -1  321.08   17.45
  -3   6  -1  323.24   18.09
  -4   6  -1  151.93    9.29
  -4   6  -1  157.87   11.27
  -4   6  -1  160.28    9.53
  -4   6  -1  178.13   11.61
   4   6   1  181.17   12.08
   4  -6   1  163.58   11.35
  -4  -6  -1  164.77   12.44
  -4   6  -1  158.56    9.99
  -4   6  -1  160.20   11.24
  -4  -6  -1  171.51   12.38
   4  -6   1  183.82   11.55
  -4   6  -1  185.96   13.46
   4  -6   1  178.72   10.19
  -4  -6  -1  158.93   11.21
  -4  -6  -1  154.90   10.98
  -4  -6  -1  176.18    9.66
  -4   6  -1  148.66   10.04
   4  -6   1  171.85   11.78
   4  -6   1  172.18   11.50
  -5  -6  -1    3.80    2.18
   5  -6   1    2.67    2.98
   5  -6   1    3.49    2.99
   5   6   1    3.19    2.81
  -5   6  -1    2.42    1.72
  -5   6  -1    6.83    2.01
   5  -6   1    5.66    3.25
   5  -6   1    5.13    3.32
  -5  -6  -1    1.91    2.77
  -5  -6  -1   -0.94    2.99
  -5  -6  -1    5.91    3.05
  -5  -6  -1    2.07    2.09
   5  -6   1    5.68    3.30
  -5   6  -1    2.70    3.20
  -5   6  -1    1.64    3.11
  -5  -6  -1    3.82    2.17
  -5   6  -1    6.99    3.41
  -5   6  -1    2.89    2.34
   5  -6   1    3.08    2.68
  -5  -6  -1    8.79    3.40
  -6   6  -1    8.60    3.63
   6  -6   1   13.47    4.03
   6  -6   1    6.28    3.76
  -6  -6  -1    8.65    4.23
  -6   6  -1    9.42    2.53
  -6  -6  -1   11.31    3.82
  -6   6  -1    3.31    3.23
  -6  -6  -1    1.77    3.67
  -6   6  -1   13.92    4.25
  -6  -6  -1   15.19    3.33
  -6  -6  -1    9.70    2.75
   6  -6   1    8.49    3.88
   6   6   1    9.34    3.38
  -6  -6  -1   10.80    2.78
  -6   6  -1    4.60    2.39
   6  -6   1    8.08    3.72
   6  -6   1   10.81    3.29
  -6  -6  -1    2.62    3.07
   7   6   1   76.43    7.50
  -7   6  -1   70.29    5.74
   7  -6   1   78.22    6.83
  -7  -6  -1   69.52    6.85
  -7  -6  -1   58.29    8.83
   7  -6   1   78.27    8.50
  -7  -6  -1   77.06    7.07
  -7   6  -1   70.10    9.01
  -7   6  -1   70.84    8.68
  -7  -6  -1   86.56    8.40
  -7   6  -1   72.56    9.09
  -7  -6  -1   78.95    9.44
  -7  -6  -1   70.94    8.03
   7  -6   1   81.40    8.66
   7  -6   1   77.93    8.46
  -7  -6  -1   76.93    7.32
   8  -6   1  172.07   12.15
  -8  -6  -1  119.82   12.37
  -8   6  -1  128.62    8.29
   8  -6   1  134.17   10.99
  -8  -6  -1  128.35    9.90
  -8  -6  -1  135.00   10.01
   8  -6   1  146.54   11.28
  -8   6  -1  132.75   12.67
  -8   6  -1  137.82   12.90
  -8  -6  -1  152.31   13.56
  -8   6  -1  131.04   12.23
  -8   6  -1  150.72   12.52
   8   6   1  124.06   10.01
  -8  -6  -1  148.85   11.23
  -8  -6  -1  123.14   10.02
  -9   6  -1   67.19    9.75
   9  -6   1   61.38    8.17
  -9   6  -1   43.49    8.44
  -9   6  -1   55.57    8.59
  -9  -6  -1   57.28    9.33
  -9   6  -1   49.70    4.06
  -9  -6  -1   66.89    7.51
   9  -6   1   49.00    7.50
   9   6   1   55.99    6.46
   9  -6   1   45.16    7.54
  -9  -6  -1   38.98    6.87
  -9  -6  -1   43.01    6.73
  -9  -6  -1   47.49    6.88
  -9   6  -1   47.63    8.97
  -9  -6  -1   46.86    8.84
 -10   6  -1   71.46   10.11
  10  -6   1   81.92    9.32
 -10   6  -1   70.94   10.56
 -10  -6  -1   89.31   11.64
 -10  -6  -1   83.80   11.07
 -10  -6  -1   79.25    9.42
 -10  -6  -1   81.72    9.27
 -10   6  -1   95.69   11.64
 -10   6  -1   92.67   11.49
 -10  -6  -1   72.49    8.87
  10   6   1   69.33    8.58
  10   6   1   73.10    7.56
  10  -6   1  109.69   10.81
  10  -6   1   92.98   10.39
 -10  -6  -1   83.52    9.26
  11  -6   1   36.74    7.16
 -11  -6  -1   32.28    7.15
  11  -6   1   46.92    8.24
 -11   6  -1   42.99    8.98
 -11   6  -1   45.62    9.07
 -11   6  -1   39.27    8.47
 -11   6  -1   42.33    9.11
  11   6   1   42.53    7.19
 -11  -6  -1   38.32    7.03
 -11  -6  -1   35.73    8.33
 -11  -6  -1   49.03    9.36
  11  -6   1   43.75    8.43
 -12  -6  -1    7.03    5.95
 -12   6  -1    7.60    4.83
 -12   6  -1    2.02    5.54
  12   6   1    6.80    4.12
 -12  -6  -1    5.44    5.44
 -12   6  -1    0.41    5.03
  12  -6   1    3.71    4.38
 -12   6  -1    1.23    5.22
  12  -6   1    0.70    4.77
 -12  -6  -1    6.00    4.62
  12   6   1    6.54    3.81
  12  -6   1   -4.04    4.64
 -13  -6  -1    4.74    5.69
  13   6   1   10.10    4.99
 -13  -6  -1    5.73    5.49
 -13   6  -1    0.89    4.98
  13   6   1    4.23    3.93
 -13  -6  -1    0.63    3.87
 -13   6  -1   -4.08    4.74
 -13   6  -1    5.21    5.67
  13  -6   1    6.50    4.74
 -13   6  -1    9.86    6.12
 -14   6  -1    1.26    5.77
 -14   6  -1    8.82    6.72
 -14  -6  -1   -1.29    6.04
 -14   6  -1    4.91    5.71
  14  -6   1   -2.98    4.45
  14   6   1    9.98    4.40
 -14  -6  -1    1.76    4.94
 -14  -6  -1   -2.39    5.62
  14  -7  -1   41.47    9.59
 -14   7   1   28.65    8.51
 -14   7   1   42.40    9.78
  14  -7  -1   29.59    8.04
  14   7  -1   40.57    8.05
 -14   7   1   68.48   12.39
 -14  -7   1   43.71   10.23
 -14  -7   1   37.16    7.88
  14  -7  -1   68.04   11.40
 -14   7   1   32.81    8.68
  14   7  -1   58.05    8.68
  13   7  -1    4.52    5.18
 -13   7   1    5.42    5.51
 -13  -7   1    4.18    6.08
 -13   7   1    3.96    5.00
  13   7  -1    8.04    5.06
 -13  -7   1    4.76    6.35
  13  -7  -1   18.94    7.64
 -13  -7   1   -1.66    3.85
  13  -7  -1    7.65    6.32
 -13   7   1    7.76    6.16
 -13   7   1    6.06    5.96
  13  -7  -1    8.67    5.74
  12   7  -1    6.22    4.56
  12  -7  -1    7.07    5.45
 -12   7   1   12.41    6.58
  12  -7  -1   24.44    7.07
 -12   7   1   12.96    6.64
 -12  -7   1    1.63    4.38
 -12  -7   1    5.29    6.03
  12   7  -1   13.31    5.43
 -12  -7   1    3.75    5.96
 -12  -7   1    1.94    4.50
 -12   7   1    5.27    5.18
 -12  -7   1    8.62    5.20
  12  -7  -1    7.46    4.99
 -12   7   1    3.35    5.52
 -11  -7   1   15.45    6.62
 -11   7   1   10.82    6.32
  11  -7  -1   12.95    5.51
  11  -7  -1   16.19    6.16
 -11  -7   1   12.25    5.08
 -11  -7   1   14.55    6.68
  11   7  -1   15.07    5.32
 -11  -7   1   21.66    5.83
 -11   7   1   11.28    2.59
 -11   7   1   14.22    6.19
 -11  -7   1   13.42    5.12
  11  -7  -1   11.02    5.55
  11   7  -1   11.89    4.82
 -11   7   1   15.80    6.11
 -11  -7   1    7.95    4.36
 -11   7   1   21.67    7.54
 -10   7   1    8.09    2.65
 -10  -7   1    6.63    4.15
 -10   7   1    5.00    4.62
 -10   7   1    8.95    4.61
  10   7  -1    6.28    4.47
  10  -7  -1    9.78    5.42
  10  -7  -1    7.92    4.97
 -10  -7   1   12.87    4.65
 -10   7   1    5.05    4.73
 -10  -7   1   10.58    4.53
 -10  -7   1   17.54    5.29
  10   7  -1    3.58    3.89
 -10   7   1    8.90    5.18
 -10  -7   1    5.34    5.00
  10  -7  -1    5.28    4.48
 -10  -7   1    4.56    5.32
  -9  -7   1   97.48   10.32
  -9   7   1  119.93   12.07
   9  -7  -1  104.76   10.71
  -9   7   1  116.50   12.10
  -9  -7   1  104.61    9.90
  -9   7   1  118.66   12.21
   9  -7  -1  137.21    9.59
   9   7  -1  101.52   10.31
  -9  -7   1  127.92   13.54
  -9  -7   1  104.15    9.68
  -9  -7   1  114.32    9.99
  -9  -7   1  107.63   12.54
   9  -7  -1  107.97   11.58
  -9   7   1  112.95   11.57
   9  -7  -1  120.01   12.02
   9   7  -1  113.38   10.93
  -9   7   1  118.48    8.13
  -8  -7   1    2.14    2.83
  -8   7   1    8.62    5.09
  -8  -7   1   -2.25    2.67
   8  -7  -1   -0.90    3.33
  -8  -7   1   -4.20    3.23
   8   7  -1    1.65    2.85
  -8   7   1    0.05    2.37
  -8  -7   1    1.05    2.77
   8  -7  -1   -0.31    3.11
  -8  -7   1    3.77    3.49
  -8   7   1    1.54    3.71
  -8  -7   1    4.83    4.63
  -8   7   1    2.42    3.74
   8  -7  -1    7.63    4.75
  -8   7   1    5.70    4.23
  -8   7   1   -0.81    1.28
   8  -7  -1    1.05    3.40
   8   7  -1    0.55    3.32
  -7  -7   1   70.76    9.87
  -7   7   1  103.01   10.02
  -7   7   1   70.96    8.87
   7  -7  -1   80.95    8.66
  -7  -7   1   69.01    7.01
   7  -7  -1   75.44    7.15
  -7   7   1   63.25    6.31
   7   7  -1   73.45    8.21
   7  -7  -1   75.42    9.24
  -7  -7   1   83.33   10.19
  -7  -7   1   75.66    7.14
   7   7  -1   71.18    8.63
  -7  -7   1   85.60    7.56
  -7   7   1   78.09    6.93
  -7  -7   1   66.69    8.18
  -7   7   1   67.61    8.19
   7  -7  -1   68.89    8.95
   6   7  -1    1.82    3.11
  -6  -7   1    4.42    2.60
  -6  -7   1    6.51    2.68
  -6  -7   1    3.13    3.70
  -6  -7   1    1.76    2.38
   6  -7  -1    5.41    3.82
  -6   7   1    5.70    3.70
  -6   7   1    1.14    2.87
  -6  -7   1    1.90    3.12
  -6   7   1    6.87    2.46
   6  -7  -1    0.28    2.52
   6  -7  -1    2.73    3.48
   6  -7  -1   -2.49    2.96
   6  -7  -1   -0.91    3.34
  -6   7   1   12.46    4.31
   6  -7  -1    2.01    2.88
   6   7  -1    6.31    3.19
  -6   7   1   -0.64    2.58
  -6  -7   1    9.01    4.26
  -5   7   1    7.26    2.22
  -5  -7   1   14.85    3.47
  -5   7   1   13.06    4.25
   5  -7  -1    6.51    3.50
  -5  -7   1   16.11    5.20
   5  -7  -1   14.34    4.18
  -5  -7   1    4.54    2.48
   5  -7  -1   15.15    3.60
   5  -7  -1   11.31    4.18
  -5  -7   1   13.03    5.02
  -5   7   1   14.12    4.32
   5   7  -1    7.16    3.97
  -5   7   1   11.99    3.79
   5  -7  -1   13.85    4.45
  -5   7   1   10.93    2.96
  -5  -7   1   20.51    3.71
   5  -7  -1    6.92    3.81
  -5   7   1   11.33    3.69
  -5  -7   1   12.85    3.95
   5   7  -1   19.29    4.52
  -4  -7   1   63.78    8.55
   4   7  -1   70.81    8.58
   4  -7  -1   64.65    6.75
   4  -7  -1   64.60    5.92
  -4  -7   1   64.26    4.10
  -4   7   1   64.34    6.76
  -4  -7   1   48.73    7.88
   4  -7  -1   61.96    7.03
  -4   7   1   51.66    6.22
   4  -7  -1   45.39    7.18
   4  -7  -1   64.79    7.79
   4   7  -1   56.97    6.54
  -4  -7   1   52.92    6.48
  -4   7   1   62.55    6.76
  -4   7   1   64.04    5.15
  -4  -7   1   69.29    5.63
  -4  -7   1   65.58    5.73
   4  -7  -1   47.22    6.76
  -4   7   1   52.23    5.67
  -4  -7   1   67.10    5.43
  -4   7   1   64.86    9.12
  -4   7   1   63.37    6.70
   3  -7  -1   12.17    3.41
  -3   7   1    8.75    2.60
   3  -7  -1   11.52    3.84
   3  -7  -1   15.11    3.24
  -3  -7   1   10.17    4.25
  -3   7   1   11.80    2.98
   3  -7  -1    9.22    3.84
  -3   7   1   15.65    5.14
   3   7  -1   11.08    4.50
   3   7  -1    5.46    3.16
   3  -7  -1   13.01    3.73
   3  -7  -1   11.53    4.30
  -3  -7   1    8.33    2.28
  -3   7   1    5.96    2.98
   3  -7  -1   13.24    3.25
  -3  -7   1   10.73    3.46
  -3  -7   1   12.40    2.80
  -3  -7   1    8.05    3.78
  -3  -7   1   11.22    2.78
   3   7  -1    4.50    2.43
  -3   7   1   14.13    3.99
  -3  -7   1   14.61    2.92
  -2   7   1  269.35   14.93
   2  -7  -1  257.61   14.71
   2  -7  -1  276.51   14.57
  -2   7   1  264.40   14.71
  -2  -7   1  262.91   17.02
  -2   7   1  278.80   15.98
  -2   7   1  290.26   18.86
  -2  -7   1  275.58   12.90
  -2  -7   1  268.15   14.19
   2   7  -1  258.39   15.44
   2  -7  -1  282.35   14.47
  -2  -7   1  260.77   14.38
   2  -7  -1  280.67   15.04
   2   7  -1  252.84   17.87
   2  -7  -1  238.84   16.08
   2  -7  -1  276.30   15.77
   2  -7  -1  266.84   16.24
  -2  -7   1  258.34   16.47
  -2  -7   1  270.50   14.34
   2   7  -1  268.16   15.74
  -2  -7   1  271.93   14.10
  -2  -7   1  288.86   15.80
  -2   7   1  263.75   14.70
   2  -7  -1  265.75   16.91
   2  -7  -1  275.55   14.16
   1   7  -1  201.34   12.79
  -1  -7   1  212.99   12.22
   1   7  -1  175.14   11.56
  -1   7   1  160.20   14.23
  -1  -7   1  197.25   12.52
  -1  -7   1  202.77   11.52
  -1  -7   1  204.09   13.66
   1   7  -1  201.24   15.10
  -1   7   1  218.40   13.08
   1   7  -1  214.43   12.71
  -1  -7   1  205.98   11.73
   1  -7  -1  199.15   13.04
  -1   7   1  218.47   11.99
   1  -7  -1  219.56   13.96
   1  -7  -1  198.78   11.37
  -1   7   1  201.69   12.19
   1  -7  -1  195.26   12.38
  -1  -7   1  236.49   12.24
   1  -7  -1  212.16   12.43
  -1  -7   1  209.03   10.72
  -1  -7   1  172.16   13.32
  -1   7   1  204.54   11.40
   1  -7  -1  210.05   11.12
   1  -7  -1  213.12   14.22
   0  -7  -1   52.58    4.58
   0  -7  -1   63.85    7.93
   0   7   1   62.91    6.03
   0   7   1   64.60    5.58
   0  -7   1   54.88    6.20
   0  -7  -1   46.78    6.92
   0  -7   1   65.90    7.65
   0   7  -1   26.23    5.98
   0  -7  -1   58.86    6.19
   0   7  -1   61.27    5.79
   0  -7   1   45.53    6.15
   0  -7   1   47.13    6.82
   0   7   1   52.44    7.93
   0  -7   1   64.49    5.82
   0  -7  -1   60.89    4.56
   0  -7   1   65.78    5.83
   0  -7   1   54.28    4.83
   0  -7  -1   65.19    6.06
   0  -7   1   68.15    5.89
   0   7  -1   57.98    6.42
   0   7   1   68.00    6.79
   0   7  -1   57.69    5.69
  -1   7  -1    6.11    2.48
   1  -7   1   13.82    2.93
   1  -7   1   13.79    3.57
  -1   7  -1    9.01    3.59
  -1   7  -1    3.60    4.15
  -1   7  -1    6.09    2.43
   1   7   1    9.16    3.23
  -1   7  -1   11.98    3.04
  -1   7  -1   15.99    3.09
   1  -7   1    8.10    3.66
   1   7   1   10.07    3.63
  -1  -7  -1   14.21    2.36
   1  -7   1   11.79    3.75
   1  -7   1    8.70    3.31
   1  -7   1   10.33    3.17
   1   7   1   18.28    5.10
   1  -7   1    8.73    3.66
  -1  -7  -1    5.43    4.00
  -1  -7  -1    8.22    3.22
   1  -7   1    4.61    2.66
  -1  -7  -1   10.55    3.99
  -1  -7  -1   10.61    2.61
  -1  -7  -1    8.25    1.56
  -2  -7  -1   96.38    6.22
   2   7   1   87.98    8.23
  -2  -7  -1   84.96    8.40
  -2   7  -1  111.18   11.19
   2  -7   1  106.47    9.07
   2  -7   1   93.92    8.25
   2  -7   1  106.20    8.08
  -2   7  -1   92.47    6.97
  -2  -7  -1   78.64    9.28
   2  -7   1  108.32    9.52
  -2   7  -1   90.89    7.36
   2  -7   1  116.01    7.32
  -2  -7  -1  100.77    9.77
  -2   7  -1   91.99    7.19
   2   7   1  100.46   10.18
  -2  -7  -1   98.07    6.19
   2  -7   1  104.97    8.02
  -2   7  -1   95.10    7.61
  -2   7  -1  100.71    8.23
   2   7   1  106.35    8.02
   2  -7   1   89.51    8.62
   2  -7   1  105.47    9.30
  -3   7  -1   12.40    2.89
   3  -7   1   14.94    3.40
  -3  -7  -1   16.41    5.03
   3  -7   1   14.65    3.98
  -3   7  -1   12.05    2.71
  -3  -7  -1   12.34    4.66
  -3   7  -1   16.63    5.42
   3  -7   1   15.32    4.48
   3  -7   1    8.18    3.51
  -3   7  -1   16.88    4.08
   3  -7   1   15.46    4.22
   3  -7   1   14.53    4.21
   3  -7   1   12.54    4.03
  -3   7  -1   17.17    3.51
  -3  -7  -1   18.28    4.40
  -3   7  -1    9.55    3.62
   3   7   1   11.13    4.26
  -3  -7  -1   13.27    2.53
  -4  -7  -1   47.02    4.37
  -4   7  -1   42.02    4.49
  -4   7  -1   37.94    6.23
  -4  -7  -1   29.33    5.51
   4  -7   1   40.25    6.15
  -4   7  -1   38.97    5.91
  -4  -7  -1   40.77    7.30
   4  -7   1   49.25    6.83
  -4   7  -1   39.02    5.32
  -4   7  -1   34.31    4.14
   4  -7   1   35.85    6.04
   4  -7   1   34.54    4.70
  -4  -7  -1   42.31    7.25
  -4   7  -1   37.59    6.15
   4  -7   1   30.04    5.89
   4   7   1   49.03    6.97
   4  -7   1   49.48    6.76
   5  -7   1   83.48    8.91
  -5   7  -1   91.09    7.63
  -5  -7  -1   86.06    6.63
  -5  -7  -1   85.68   10.09
  -5   7  -1   87.18    9.04
   5  -7   1   84.88    7.07
  -5  -7  -1   85.55   10.14
  -5   7  -1   87.06    6.46
  -5   7  -1   85.16    8.78
   5  -7   1   93.36    9.19
   5  -7   1   85.07    8.90
  -5   7  -1   90.04    7.13
   5   7   1   83.03    8.99
  -5   7  -1   82.63    8.91
  -5  -7  -1   72.51    8.41
   5  -7   1   76.68    8.44
  -6  -7  -1   53.84    7.54
  -6   7  -1   66.01    6.18
   6  -7   1   54.29    8.01
  -6   7  -1   68.08    8.41
   6  -7   1   79.07    6.91
   6  -7   1   63.48    8.01
  -6   7  -1   61.39    6.05
  -6  -7  -1   67.89    9.41
   6  -7   1   77.07    8.52
   6  -7   1   61.95    8.07
  -6   7  -1   68.20    8.52
  -6  -7  -1   57.57    9.18
   6   7   1   72.71    8.43
  -6   7  -1   71.29    8.68
  -7  -7  -1   27.88    6.73
  -7  -7  -1   31.77    6.96
  -7   7  -1   34.79    7.04
   7   7   1   15.34    4.78
   7  -7   1   28.91    5.01
   7  -7   1   31.75    6.59
   7  -7   1   23.36    6.42
   7  -7   1   33.33    6.40
  -7   7  -1   19.11    5.72
  -7   7  -1   23.93    3.51
  -7   7  -1   36.25    6.92
  -7  -7  -1   21.68    5.31
  -7   7  -1   27.80    4.18
   7  -7   1   14.57    4.87
   7   7   1   21.25    5.28
  -8  -7  -1   70.14    8.88
  -8   7  -1   54.65    5.82
  -8  -7  -1   61.67   10.05
   8   7   1   77.33    8.91
  -8   7  -1   76.84   10.01
  -8   7  -1   68.08    9.78
   8  -7   1   72.66    9.06
   8  -7   1   86.96    9.60
  -8  -7  -1   73.26   10.23
   8  -7   1   86.11   10.60
   8  -7   1   73.98    9.21
   8   7   1   63.96    7.81
  -8   7  -1   73.15    9.61
   9   7   1   76.07    8.56
   9  -7   1   70.59   10.40
  -9   7  -1   77.92    6.11
  -9  -7  -1   63.63   10.48
  -9  -7  -1   64.12   10.54
   9   7   1   82.61    9.44
   9  -7   1   82.64    9.72
  -9   7  -1   89.46   10.89
   9  -7   1  103.82   10.72
  -9   7  -1   53.05    9.21
  -9  -7  -1   66.04    8.88
  -9   7  -1   76.98   10.65
   9  -7   1   79.09    9.92
 -10   7  -1   19.70    6.47
 -10  -7  -1    3.48    3.98
 -10   7  -1    9.02    5.46
  10   7   1   12.13    4.66
 -10  -7  -1    4.33    5.07
  10  -7   1   10.46    5.37
 -10   7  -1    4.71    5.01
  10  -7   1    7.11    5.54
  10  -7   1    3.12    4.52
 -10   7  -1    4.67    1.85
 -10  -7  -1   17.54    6.90
  10   7   1    2.78    3.86
 -11   7  -1   90.05   12.37
 -11  -7  -1   91.15   10.53
  11   7   1   84.60    9.15
  11   7   1   86.28   10.19
 -11   7  -1  119.83   13.78
  11  -7   1   94.51   11.17
 -11  -7  -1   92.16   12.52
  11  -7   1   91.44   11.32
 -11  -7  -1   92.36   12.78
 -11   7  -1  110.93   13.40
  11  -7   1  102.60   11.36
 -12  -7  -1    1.20    4.37
  12   7   1    7.76    5.09
  12   7   1    0.64    4.12
 -12   7  -1   -0.32    5.11
 -12  -7  -1   11.25    6.27
 -12  -7  -1    5.16    5.87
 -12   7  -1   -1.19    5.17
 -12   7  -1    8.77    5.87
  12  -7   1    7.20    5.20
 -13  -7  -1    0.90    4.71
  13  -7   1    4.74    5.53
  13   7   1    2.83    4.92
 -13   7  -1   18.62    7.35
 -13   7  -1   17.80    7.57
 -13  -7  -1    0.57    5.99
 -13  -7  -1    7.38    6.65
 -13   7  -1    6.55    6.27
  13   7   1   12.85    6.27
 -13   7  -1   14.16    6.92
 -14  -7  -1    5.08    5.70
 -14   7  -1    8.16    6.92
 -14   7  -1   13.05    7.44
 -14   7  -1   12.02    7.04
 -14  -7  -1   31.01    9.21
 -13  -8   1   40.75    7.88
 -13   8   1   46.41    9.92
  13  -8  -1   30.11    9.22
  13   8  -1   34.89    7.92
 -13   8   1   27.23    8.60
  13  -8  -1   55.27   10.81
 -13   8   1   48.86   10.78
  13  -8  -1   31.29    8.10
  13   8  -1   34.26    7.92
 -13   8   1   36.19    9.69
 -13  -8   1   49.16   10.57
 -12   8   1   -2.94    5.27
  12   8  -1    4.73    5.33
  12  -8  -1    0.03    5.08
 -12  -8   1    1.76    5.72
 -12  -8   1    3.74    4.53
  12  -8  -1    3.07    6.16
  12  -8  -1   10.03    6.31
 -12   8   1    6.91    5.96
 -12   8   1   20.57    8.06
 -12  -8   1    3.09    6.08
 -12   8   1   -2.19    1.72
 -12   8   1    0.40    4.54
  12   8  -1    3.02    4.47
  11   8  -1    2.63    4.25
  11   8  -1    8.48    5.37
 -11  -8   1    2.40    5.53
 -11   8   1    5.46    2.74
 -11   8   1    8.16    5.74
 -11   8   1    9.60    5.95
 -11   8   1   17.90    6.94
 -11  -8   1    3.15    5.90
  11  -8  -1    8.80    5.75
  11  -8  -1    6.91    5.37
 -11  -8   1    4.17    4.36
  11  -8  -1    5.10    5.59
 -10   8   1   13.66    6.12
 -10   8   1    3.99    5.12
 -10   8   1   10.64    3.25
 -10  -8   1   14.66    5.27
  10  -8  -1    6.06    5.26
 -10   8   1   19.49    6.59
 -10  -8   1    6.71    5.64
  10  -8  -1   10.11    5.64
 -10  -8   1    8.23    5.64
  10   8  -1   16.20    6.07
  10  -8  -1   -0.77    4.79
  10   8  -1   15.86    5.56
  -9   8   1   10.34    3.27
  -9  -8   1   15.27    6.01
  -9   8   1   27.29    7.11
   9   8  -1   10.32    5.61
  -9   8   1   18.40    5.71
  -9  -8   1    8.46    4.37
   9  -8  -1   21.02    6.64
  -9   8   1   10.68    2.91
   9  -8  -1   14.39    5.66
   9  -8  -1   14.29    6.13
   9  -8  -1    9.74    4.52
  -9   8   1   15.07    5.47
   9   8  -1   19.23    5.53
   9  -8  -1    6.45    4.76
  -9  -8   1   22.76    7.56
  -8  -8   1    2.73    3.52
   8  -8  -1    4.92    3.91
  -8   8   1    6.72    4.21
  -8  -8   1   12.16    5.87
  -8   8   1    2.25    3.07
  -8   8   1    2.55    2.07
   8   8  -1    3.50    3.57
   8  -8  -1    7.88    4.31
  -8  -8   1    4.88    4.83
   8  -8  -1    4.72    4.47
  -8   8   1   12.59    5.22
   8  -8  -1   10.17    5.12
   8  -8  -1    6.53    4.76
   8   8  -1   10.19    4.87
  -8   8   1    3.71    4.44
  -7  -8   1    2.60    4.32
  -7   8   1    5.07    4.01
   7  -8  -1    2.18    3.69
   7  -8  -1    1.15    3.32
   7   8  -1   -0.42    2.66
  -7  -8   1    1.87    4.85
  -7   8   1    3.84    2.33
   7  -8  -1   -0.36    2.89
  -7   8   1    0.41    3.27
  -7   8   1    2.83    3.29
   7   8  -1    2.65    4.09
   7  -8  -1   -1.32    4.18
   7  -8  -1   11.61    4.66
  -7  -8   1    4.78    3.68
  -7   8   1    6.61    4.25
   6   8  -1    8.34    4.49
  -6   8   1    5.63    4.09
  -6   8   1    4.46    2.52
  -6  -8   1   12.65    5.80
   6  -8  -1   10.10    3.95
   6  -8  -1   11.12    4.89
  -6   8   1    7.19    3.88
   6  -8  -1    0.21    3.09
   6  -8  -1   13.22    4.65
  -6  -8   1    6.79    3.89
   6  -8  -1   14.15    5.23
  -6   8   1    0.58    3.20
   6  -8  -1    4.53    3.56
   6   8  -1    3.79    3.43
  -6  -8   1    3.15    4.15
  -6   8   1    5.35    3.95
  -6  -8   1    9.29    3.42
   5  -8  -1   -0.22    3.17
  -5  -8   1    1.47    4.05
  -5   8   1   -0.27    3.46
   5   8  -1   -1.25    3.57
  -5  -8   1    1.90    2.75
   5   8  -1    2.51    3.10
   5  -8  -1    1.17    3.28
  -5  -8   1    0.96    4.05
  -5  -8   1    4.42    2.46
  -5   8   1   -1.10    1.82
   5  -8  -1    3.35    3.26
   5  -8  -1   -0.69    2.90
  -5   8   1    1.20    3.16
   5  -8  -1   -2.97    2.91
  -5   8   1    2.21    3.14
   5  -8  -1    0.99    3.83
  -5   8   1    2.80    3.63
  -4  -8   1   34.73    7.48
  -4   8   1   35.02    6.16
   4  -8  -1   49.26    7.22
   4  -8  -1   51.17    7.75
   4  -8  -1   38.11    5.10
  -4   8   1   28.32    4.69
  -4  -8   1   26.77    4.25
   4   8  -1   36.30    5.93
   4  -8  -1   40.73    5.83
  -4  -8   1   35.35    7.20
  -4   8   1   34.02    4.17
  -4  -8   1   32.47    3.14
   4   8  -1   44.99    7.99
   4  -8  -1   54.85    7.86
  -4  -8   1   30.87    5.79
  -4   8   1   25.50    5.13
  -3  -8   1   95.11    6.58
   3  -8  -1   79.72    9.39
   3  -8  -1   66.98    8.69
  -3  -8   1   77.45    9.66
   3  -8  -1   51.35    6.00
  -3   8   1   73.24    6.59
  -3  -8   1   66.20    6.12
   3  -8  -1   87.96    7.58
  -3   8   1   81.26    7.44
   3  -8  -1   80.86    7.31
   3   8  -1   71.32    7.58
  -3   8   1   96.43    8.80
  -3   8   1   70.34    6.93
  -3  -8   1   81.99    9.71
  -3  -8   1   81.43    5.89
   3  -8  -1   71.94    8.15
  -3  -8   1   67.72    6.30
  -3   8   1   91.13   10.99
  -3  -8   1   64.61    7.72
  -2  -8   1   54.36    5.30
  -2  -8   1   66.76    8.64
  -2   8   1   57.76    5.88
   2  -8  -1   48.69    7.59
  -2  -8   1   57.41    7.01
   2   8  -1   54.85    6.34
   2  -8  -1   51.85    6.72
  -2  -8   1   54.18    3.95
   2   8  -1   43.39    8.06
   2  -8  -1   55.78    5.33
  -2  -8   1   50.23    5.31
  -2  -8   1   50.66    5.26
   2  -8  -1   61.90    8.15
  -2   8   1   42.89    8.32
   2  -8  -1   46.47    5.41
   2  -8  -1   51.75    6.06
  -2  -8   1   50.58    7.72
  -2   8   1   56.27    6.07
  -2  -8   1   52.92    5.48
  -2   8   1   63.29    7.43
   2   8  -1   60.36    7.07
   1   8  -1   24.43    4.48
   1   8  -1   29.92    4.52
   1  -8  -1   26.57    3.63
  -1   8   1   32.54    7.36
  -1  -8   1   26.26    4.17
   1  -8  -1   30.77    4.01
   1  -8  -1   15.72    4.10
  -1  -8   1   19.83    4.50
   1  -8  -1   20.14    5.49
  -1  -8   1   24.86    3.36
  -1  -8   1   20.83    4.16
  -1  -8   1   27.82    4.10
   1  -8  -1   24.35    4.68
  -1  -8   1   19.68    3.75
  -1   8   1   28.99    4.58
   1  -8  -1   28.24    6.02
  -1  -8   1   27.83    5.83
  -1   8   1   24.06    4.15
  -1   8   1   21.22    5.00
   1   8  -1   30.15    5.42
  -1  -8   1   16.33    5.08
   1   8  -1   31.93    7.19
   0  -8  -1  205.18   13.53
   0  -8   1  216.04   15.26
   0  -8   1  223.97   12.72
   0   8   1  227.77   14.26
   0   8   1  222.20   13.70
   0   8   1  244.42   17.13
   0  -8   1  211.75   13.00
   0  -8   1  230.01   12.16
   0  -8  -1  187.35   14.53
   0  -8   1  223.17   12.88
   0  -8  -1  228.17   11.52
   0  -8  -1  221.59   13.23
   0  -8   1  222.80   15.07
   0   8  -1  222.97   13.40
   0  -8   1  208.31   13.53
   0  -8  -1  182.12   14.69
   0   8  -1  226.93   13.27
   0   8  -1  209.33   14.04
  -1   8  -1    2.94    2.12
   1  -8   1    2.64    2.89
   1  -8   1   -0.36    2.05
   1   8   1    6.99    4.58
  -1  -8  -1    6.81    3.26
   1   8   1    1.45    2.23
  -1  -8  -1    2.60    3.37
   1   8   1    5.83    3.56
   1  -8   1    4.81    3.37
   1  -8   1    5.30    2.99
  -1   8  -1   12.03    3.17
   1  -8   1    7.71    3.31
  -1   8  -1    0.53    1.95
  -1   8  -1    1.44    4.24
   1  -8   1    2.37    3.91
  -1   8  -1   -1.03    2.78
  -1  -8  -1    0.39    1.96
  -1  -8  -1    6.94    3.99
   1  -8   1    4.92    2.90
   2  -8   1  238.99   13.79
  -2  -8  -1  235.45   16.48
  -2  -8  -1  251.84   13.01
  -2   8  -1  248.49   15.67
  -2   8  -1  226.88   13.91
   2  -8   1  253.60   14.96
  -2   8  -1  274.68   19.27
   2  -8   1  236.74   16.35
   2  -8   1  264.65   15.44
   2  -8   1  238.39   15.57
   2   8   1  266.83   18.06
   2  -8   1  279.78   15.28
   2  -8   1  252.90   16.31
   2   8   1  247.55   15.56
  -2  -8  -1  244.45   17.05
  -2  -8  -1  257.18   15.65
  -2   8  -1  254.24   14.73
  -2   8  -1  245.68   14.53
   3  -8   1   55.06    7.59
   3   8   1   67.90    8.94
   3  -8   1   65.97    8.02
   3  -8   1   55.57    7.00
   3  -8   1   55.24    5.79
  -3   8  -1   61.30    6.44
   3  -8   1   47.29    7.53
   3  -8   1   62.07    8.12
  -3   8  -1   53.21    6.79
   3   8   1   41.03    6.29
  -3   8  -1   62.35    5.85
  -3  -8  -1   51.29    8.24
   3  -8   1   62.44    7.24
  -3  -8  -1   49.73    3.55
  -3   8  -1   65.12    7.09
  -3  -8  -1   73.78    9.50
  -3   8  -1   51.12    5.46
   3  -8   1   52.71    6.86
  -3  -8  -1   50.28    6.98
   4  -8   1   16.29    5.22
  -4   8  -1   25.03    4.02
  -4   8  -1   25.06    5.51
  -4   8  -1   19.38    4.08
   4  -8   1   20.86    5.38
  -4  -8  -1   17.75    4.77
  -4  -8  -1   28.06    6.77
  -4   8  -1   24.51    3.91
   4  -8   1   15.76    4.97
   4  -8   1   34.60    6.58
  -4  -8  -1   28.69    6.96
   4  -8   1   32.27    6.44
   4  -8   1   21.93    5.13
   4   8   1   17.49    4.67
   4   8   1   17.42    5.75
   4  -8   1   17.53    4.10
  -4   8  -1   27.03    5.30
   5  -8   1    6.98    3.66
  -5   8  -1    6.20    4.21
  -5   8  -1    2.41    3.01
  -5   8  -1    5.53    2.59
  -5  -8  -1    2.18    3.92
   5   8   1    0.68    3.62
  -5   8  -1    3.50    4.03
  -5   8  -1    7.65    4.07
   5  -8   1   -0.39    3.50
  -5  -8  -1    3.90    4.56
   5  -8   1    4.94    3.77
   5  -8   1   11.53    4.62
   5  -8   1    7.02    4.76
  -5  -8  -1   10.03    4.16
   5  -8   1    3.66    3.75
   5   8   1    6.51    3.78
  -6  -8  -1    1.12    3.93
  -6   8  -1    2.20    2.30
   6  -8   1    4.64    4.17
  -6   8  -1    3.53    3.92
   6  -8   1    6.49    4.05
  -6  -8  -1   -0.19    3.64
   6  -8   1    3.20    3.22
   6   8   1    3.31    3.73
  -6   8  -1    3.60    3.26
  -6  -8  -1    4.27    3.71
   6  -8   1   -0.94    3.28
   6   8   1    3.64    3.29
  -6   8  -1   -1.11    3.34
  -6   8  -1   -4.33    2.94
   6  -8   1    0.64    3.28
  -7  -8  -1   10.74    5.49
  -7   8  -1   17.67    4.03
   7  -8   1   24.99    6.20
   7  -8   1   17.36    5.58
  -7   8  -1   13.41    5.00
  -7   8  -1   23.31    6.00
   7  -8   1   19.77    5.78
  -7  -8  -1   23.09    5.72
  -7   8  -1   20.50    5.85
   7   8   1   24.08    5.78
   7   8   1   33.70    6.81
  -7   8  -1   20.12    4.17
   7  -8   1   26.06    6.22
  -7  -8  -1   30.43    7.63
   7  -8   1   24.84    5.06
  -8   8  -1    4.24    5.24
  -8  -8  -1    7.74    5.33
   8   8   1    0.81    3.51
   8  -8   1    2.66    3.89
  -8  -8  -1    5.47    4.52
  -8   8  -1    8.94    5.18
   8  -8   1    1.10    4.56
  -8  -8  -1    9.31    4.57
   8  -8   1   14.26    4.75
   8   8   1   12.91    5.13
   8  -8   1   11.24    5.40
  -8   8  -1    4.86    4.88
   8  -8   1   13.94    5.80
  -8   8  -1    6.07    2.70
  -9   8  -1   -2.70    4.51
  -9  -8  -1    1.65    4.90
  -9   8  -1    3.50    4.37
   9  -8   1   -4.93    3.69
  -9   8  -1    6.85    5.54
   9   8   1    6.60    4.34
   9   8   1   -0.58    3.90
   9  -8   1    4.68    4.71
   9  -8   1    0.70    4.71
  -9  -8  -1    1.79    4.26
  -9  -8  -1   -0.59    5.17
   9  -8   1   -2.00    4.57
  -9   8  -1   -0.56    1.73
  10   8   1   -2.01    3.90
  10  -8   1    0.64    5.16
  10  -8   1    0.96    4.78
  10  -8   1    7.81    5.95
 -10   8  -1    2.59    2.27
  10  -8   1    3.88    5.24
 -10  -8  -1    3.08    4.91
 -10  -8  -1   11.47    6.05
 -10   8  -1    6.36    5.92
 -10   8  -1    0.21    4.53
  10   8   1    1.82    4.53
 -10   8  -1    3.54    5.47
 -10  -8  -1    2.39    4.12
 -11   8  -1   -5.39    4.62
  11  -8   1   -1.48    5.29
  11   8   1    3.22    4.66
  11  -8   1    3.93    5.62
  11  -8   1    4.12    5.16
 -11  -8  -1    7.29    4.99
 -11  -8  -1    3.10    5.74
  11   8   1    1.89    4.44
 -11   8  -1   -1.91    4.39
 -11   8  -1    4.82    5.70
 -11  -8  -1    1.31    5.64
  12  -8   1   17.34    7.99
  12   8   1   12.45    5.53
 -12   8  -1   14.26    6.90
 -12  -8  -1   18.35    6.46
 -12   8  -1   18.17    7.62
 -12   8  -1   15.26    7.07
  12   8   1   13.91    6.02
 -12  -8  -1   34.48    9.47
 -12  -8  -1   19.91    7.50
  12  -8   1   23.02    7.32
  13  -8   1   28.13    7.91
 -13  -8  -1   30.18    9.43
 -13   8  -1   19.80    8.22
 -13   8  -1   50.13   10.72
 -13   8  -1   30.99    9.40
 -13  -8  -1   29.72    7.51
 -12   9   1    6.88    6.53
  12  -9  -1   34.57    9.23
 -12  -9   1   18.92    7.91
 -12   9   1   10.00    3.10
  12  -9  -1    7.71    6.76
 -12   9   1   12.35    7.22
 -12  -9   1   11.75    5.94
  12   9  -1   16.66    7.14
  12  -9  -1   17.16    7.77
  12  -9  -1   14.68    7.28
 -12   9   1    6.14    6.27
 -11   9   1   17.01    6.86
 -11   9   1   17.44    7.13
 -11   9   1   25.81    8.03
 -11  -9   1   31.49    8.98
 -11  -9   1    7.42    5.37
 -11  -9   1   17.52    8.06
  11   9  -1   22.27    7.24
  11  -9  -1   29.53    8.53
 -11   9   1   17.12    3.85
  11  -9  -1   20.12    8.17
  11   9  -1   24.92    7.42
  11  -9  -1   20.22    7.46
  11  -9  -1   27.85    8.07
  10  -9  -1    0.16    5.85
  10   9  -1    6.77    5.86
 -10   9   1   10.70    5.81
 -10   9   1   23.81    7.47
  10  -9  -1    8.00    6.11
 -10   9   1    7.61    3.04
  10  -9  -1    6.95    6.02
  10   9  -1   20.82    6.30
 -10  -9   1   10.26    6.52
  10  -9  -1   10.81    5.30
 -10  -9   1    8.41    4.87
 -10   9   1    1.45    5.01
 -10  -9   1   13.54    6.86
  -9   9   1    0.77    1.99
  -9   9   1    2.07    4.27
  -9   9   1    7.26    5.25
  -9   9   1    0.35    3.03
  -9   9   1   10.53    6.09
  -9  -9   1    0.52    5.27
   9  -9  -1    0.05    4.58
   9   9  -1    5.69    5.30
  -9  -9   1    8.48    5.75
   9  -9  -1    8.39    5.95
   9   9  -1   10.81    5.36
   9  -9  -1   10.47    5.71
  -9  -9   1    0.91    3.82
   9  -9  -1   11.43    5.05
  -8   9   1   11.39    3.48
   8   9  -1   15.17    5.52
   8   9  -1   12.62    5.75
  -8   9   1   12.54    4.29
   8  -9  -1    1.81    5.04
  -8   9   1   16.34    6.17
  -8  -9   1    5.11    5.37
  -8  -9   1   14.13    5.12
  -8   9   1   11.52    5.52
  -8   9   1   10.77    5.43
   8  -9  -1    8.19    4.44
  -8  -9   1   12.00    6.18
   8  -9  -1   13.88    5.67
   8  -9  -1    3.70    4.69
   7  -9  -1   -1.25    3.37
  -7  -9   1    1.47    4.69
   7   9  -1    4.09    5.36
   7  -9  -1    5.61    4.18
   7  -9  -1    5.75    5.00
  -7  -9   1    5.09    4.05
  -7   9   1    1.15    2.29
  -7   9   1    8.83    4.30
   7  -9  -1    5.38    5.30
  -7  -9   1    6.82    5.12
  -7   9   1    0.41    4.06
   7   9  -1    2.05    3.36
   7  -9  -1    5.88    4.44
   6  -9  -1    9.89    4.29
  -6  -9   1    7.91    4.42
  -6   9   1    5.98    4.29
   6   9  -1    7.81    4.11
   6  -9  -1    8.93    4.63
  -6   9   1    6.47    3.01
  -6  -9   1   23.45    6.98
   6   9  -1   12.73    6.17
  -6  -9   1   12.83    5.91
   6  -9  -1    6.96    4.88
   6  -9  -1   13.70    5.67
   6  -9  -1    8.91    5.01
   5   9  -1   -1.40    2.68
   5  -9  -1   -1.57    3.93
   5  -9  -1    5.34    3.82
  -5  -9   1    0.70    4.55
  -5   9   1   -0.87    3.92
  -5  -9   1    2.08    3.61
  -5   9   1   -2.43    2.06
  -5  -9   1   -0.10    4.09
   5  -9  -1   -0.80    3.46
   5  -9  -1    5.70    4.43
  -5   9   1    7.06    4.29
   5   9  -1    6.15    4.62
  -4  -9   1   27.91    7.16
   4  -9  -1   24.52    5.67
   4  -9  -1   17.42    6.13
   4   9  -1   24.62    6.78
  -4  -9   1   21.37    5.51
   4  -9  -1   22.13    6.46
   4  -9  -1   15.73    4.37
   4   9  -1   15.36    5.05
  -4   9   1   29.29    6.18
  -4  -9   1   26.34    2.97
  -4   9   1   24.98    4.85
  -4  -9   1   26.91    6.88
   3  -9  -1   39.80    5.96
  -3   9   1   39.42    5.09
   3   9  -1   46.84    9.12
   3  -9  -1   34.52    4.98
   3   9  -1   32.82    5.89
  -3  -9   1   37.30    4.35
   3  -9  -1   41.84    7.85
   3  -9  -1   61.00    8.68
   3  -9  -1   34.79    6.18
  -3   9   1   50.64    6.28
  -3   9   1   42.92    7.23
  -3  -9   1   17.89    6.72
  -3  -9   1   28.91    7.31
  -3  -9   1   38.23    6.56
  -2  -9   1   21.43    6.36
  -2  -9   1   22.41    5.27
  -2  -9   1   40.00    7.79
   2  -9  -1   28.44    5.58
   2   9  -1   31.43    5.36
  -2   9   1   29.21    4.75
  -2  -9   1   27.39    4.44
  -2   9   1   21.28    5.91
   2  -9  -1   32.98    7.16
   2  -9  -1   25.60    5.16
   2   9  -1   25.64    7.46
   2  -9  -1   34.06    4.49
  -2   9   1   22.10    4.71
  -2   9   1   21.37    7.18
   2   9  -1   37.97    6.29
   2  -9  -1   28.97    6.72
  -2  -9   1   16.66    2.48
   1   9  -1   28.60    5.98
   1  -9  -1   28.58    5.44
   1   9  -1   32.03    5.14
  -1  -9   1   19.42    4.23
   1  -9  -1   30.11    6.80
   1  -9  -1   29.72    5.49
   1   9  -1   38.12    8.36
  -1   9   1   28.87    4.85
  -1   9   1   20.48    6.43
  -1  -9   1   22.51    6.21
   1  -9  -1   47.29    7.92
  -1  -9   1   25.87    3.60
   1  -9  -1   26.44    4.01
  -1  -9   1   28.29    6.80
  -1   9   1   35.90    6.65
   0   9  -1  126.42    9.79
   0  -9   1  132.76    8.44
   0   9  -1  134.94    9.91
   0  -9   1  134.95   12.94
   0  -9  -1  114.47   10.41
   0  -9  -1  133.67   12.78
   0  -9   1  134.28    9.66
   0   9   1  131.67   13.76
   0   9   1  115.63    9.65
   0   9  -1  148.03   11.25
   0   9   1  131.00   10.86
   0  -9  -1  133.39    7.91
   0  -9  -1  118.86   12.06
   0   9  -1  122.26    9.55
   0  -9  -1  118.41    9.37
   0  -9   1  124.35   10.07
   0  -9   1  145.54   12.79
  -1   9  -1    6.90    5.62
  -1  -9  -1    4.28    2.59
   1  -9   1    4.79    3.32
  -1   9  -1    5.20    2.79
  -1   9  -1    8.27    4.68
  -1   9  -1    9.48    3.30
   1  -9   1    6.33    4.22
   1   9   1    6.09    3.20
  -1  -9  -1    2.51    3.98
  -1  -9  -1    6.84    3.44
   1   9   1    4.37    4.46
   1  -9   1    3.25    4.30
   1  -9   1    3.02    2.88
   1   9   1   -1.50    3.92
  -1   9  -1    1.68    2.80
   1  -9   1    1.70    3.03
  -1  -9  -1    4.06    4.23
   2  -9   1   28.11    5.49
   2  -9   1   23.96    6.38
   2  -9   1   34.90    6.48
   2  -9   1   37.58    7.25
  -2  -9  -1   29.02    3.91
   2  -9   1   27.41    5.22
  -2   9  -1   33.23    5.08
  -2  -9  -1   29.26    7.05
  -2   9  -1   23.69    4.46
  -2  -9  -1   35.49    7.32
   2   9   1   21.89    6.60
  -2   9  -1   35.20    5.53
  -2   9  -1   41.01    6.75
  -2  -9  -1   44.90    6.86
   2   9   1   32.83    5.50
   2  -9   1   27.43    4.49
   2  -9   1   33.00    5.52
  -3   9  -1    1.97    2.30
   3   9   1    1.60    2.75
  -3   9  -1    0.33    2.30
   3  -9   1    3.59    3.87
   3  -9   1    3.13    3.55
   3  -9   1    6.81    3.89
   3  -9   1   -2.60    3.09
   3  -9   1    4.56    4.25
  -3   9  -1    5.32    2.94
  -3  -9  -1    0.27    1.27
   3  -9   1   -1.76    2.90
  -3   9  -1    1.56    3.57
  -3  -9  -1    1.37    3.77
  -3  -9  -1   -0.45    3.12
   3   9   1   -0.29    4.00
   3  -9   1    1.01    2.99
  -3  -9  -1    3.44    4.49
   4   9   1   56.87    7.69
  -4   9  -1   58.77    7.71
   4  -9   1   57.04    8.43
   4  -9   1   58.53    6.74
  -4  -9  -1   48.26    7.63
   4  -9   1   55.73    8.79
   4  -9   1   75.01    9.47
   4   9   1   58.68    9.48
  -4  -9  -1   44.90    8.86
  -4   9  -1   59.39    6.99
  -4  -9  -1   52.87    9.57
   4  -9   1   58.52    7.82
   4  -9   1   65.29    8.12
  -5  -9  -1    0.96    3.59
  -5   9  -1    2.63    2.52
   5  -9   1   -3.00    3.91
   5  -9   1    3.57    4.23
   5  -9   1   -1.57    3.99
  -5   9  -1    4.20    3.46
   5  -9   1   -0.49    3.23
  -5  -9  -1    0.55    4.14
   5  -9   1    1.54    3.68
  -5  -9  -1    7.42    5.13
   5  -9   1    5.12    4.40
  -5   9  -1   -0.37    3.74
   5   9   1    4.08    3.38
   5  -9   1    0.81    4.32
   5   9   1   -4.70    3.71
   6  -9   1   47.84    6.63
  -6  -9  -1   36.24    7.02
   6  -9   1   40.68    7.69
   6  -9   1   39.86    8.00
   6  -9   1   54.16    8.65
   6   9   1   47.19    7.28
  -6   9  -1   47.91    8.21
   6   9   1   40.06    8.47
  -6   9  -1   46.11    6.52
  -6  -9  -1   49.92    9.38
  -6  -9  -1   38.51    8.62
  -6   9  -1   39.56    5.83
   7   9   1   69.95    9.97
   7  -9   1   66.80    9.81
   7  -9   1   68.68    9.73
  -7   9  -1   83.38   10.25
  -7  -9  -1   51.23    8.37
  -7  -9  -1   52.63    9.77
  -7   9  -1   47.59    6.24
   7  -9   1   57.40    9.09
  -7   9  -1   61.97    6.93
   7   9   1   60.88    8.44
  -7   9  -1   52.57    9.10
  -7  -9  -1   66.89   11.20
  -7   9  -1   66.71    9.57
   7  -9   1   64.25    7.48
  -8   9  -1   -3.07    4.01
   8  -9   1   12.52    6.09
  -8   9  -1    5.05    5.54
   8  -9   1   -0.40    5.06
   8   9   1    7.28    4.24
  -8   9  -1    3.66    2.60
  -8  -9  -1    9.13    5.45
   8  -9   1    4.24    4.84
   8   9   1    6.15    5.19
  -8   9  -1    8.63    5.43
   8  -9   1    5.13    5.01
   8  -9   1   10.47    4.81
  -8  -9  -1    7.48    5.92
  -8   9  -1    3.93    3.07
  -8  -9  -1    4.23    4.34
  -9   9  -1    2.52    4.44
   9  -9   1   12.33    6.09
   9   9   1    2.46    4.89
  -9   9  -1    4.44    2.60
   9  -9   1    8.22    6.08
  -9  -9  -1    7.80    6.42
  -9  -9  -1    5.00    5.41
   9  -9   1    8.26    5.73
  -9  -9  -1   -0.37    4.12
   9   9   1    6.96    4.79
  -9   9  -1   -3.28    4.44
  -9   9  -1   11.14    5.46
   9  -9   1    4.02    5.06
  10  -9   1    8.30    6.22
 -10   9  -1    5.37    2.85
 -10  -9  -1    8.87    6.71
 -10   9  -1    3.78    6.03
 -10  -9  -1   -0.31    5.36
 -10   9  -1    6.18    6.10
 -10  -9  -1    7.57    5.22
  10   9   1    0.42    5.27
  10   9   1   15.24    5.75
  10  -9   1   -0.58    5.71
 -10   9  -1    8.08    6.01
  10  -9   1    4.71    5.40
 -11  -9  -1   34.89    7.83
  11   9   1   30.17    8.28
 -11   9  -1   47.06   10.08
 -11   9  -1   35.80    8.50
  11   9   1   45.40    8.56
  11  -9   1   28.16    8.59
 -11   9  -1   21.89    3.46
 -11   9  -1   24.00    7.97
  11  -9   1   13.64    6.63
 -11  -9  -1   31.76    9.40
 -12  -9  -1   25.25    7.99
  12  -9   1   23.99    7.73
 -12   9  -1   19.29    7.96
 -12  -9  -1   16.94    8.03
 -12   9  -1   35.56    9.44
 -12   9  -1   26.25    8.48
 -11 -10   1   -1.50    6.10
 -11  10   1    1.29    5.76
  11 -10  -1    6.24    6.84
 -11 -10   1    1.55    4.76
  11 -10  -1    6.01    6.67
 -11  10   1    3.05    2.88
  10 -10  -1    7.59    7.12
  10 -10  -1    6.74    5.68
 -10  10   1    0.60    2.45
 -10 -10   1   -1.06    5.96
  10  10  -1    2.47    6.31
  10 -10  -1   10.14    6.92
 -10 -10   1    2.03    4.26
 -10  10   1   -4.85    4.90
   9 -10  -1    4.31    5.60
   9 -10  -1    0.11    5.80
   9  10  -1    2.33    6.02
  -9  10   1    1.05    4.99
   9  10  -1   -1.51    3.85
  -9 -10   1   -0.42    4.34
  -9 -10   1    0.71    5.64
  -9  10   1   -0.08    2.40
  -9 -10   1   -1.97    4.92
  -9  10   1   -0.08    3.60
   9 -10  -1    6.68    4.57
  -8  10   1    1.70    4.14
   8  10  -1    4.44    5.96
   8 -10  -1    5.49    4.53
   8 -10  -1   -3.89    5.04
   8  10  -1    1.17    4.09
  -8  10   1   -0.75    2.52
  -8  10   1   -0.45    4.59
  -8 -10   1   -5.91    4.53
  -8 -10   1   -0.60    4.13
   8 -10  -1    6.93    5.73
  -8 -10   1    1.20    5.41
  -7 -10   1    5.37    5.45
  -7 -10   1    0.57    3.99
   7 -10  -1   -2.98    4.51
   7 -10  -1   -0.48    3.96
  -7  10   1   -0.21    2.17
   7  10  -1   -4.04    5.02
   7 -10  -1   -0.63    5.24
  -7 -10   1    8.82    5.90
  -7  10   1   -0.53    4.22
   7 -10  -1    3.69    5.08
   7  10  -1   -0.14    3.56
   6  10  -1   43.35    7.37
   6 -10  -1   38.07    8.85
  -6  10   1   39.48    6.31
   6  10  -1   28.06    8.29
  -6  10   1   37.23    7.11
  -6 -10   1   32.50    8.47
   6 -10  -1   44.18    8.38
   6 -10  -1   25.89    5.69
  -6 -10   1   34.19    8.43
   6 -10  -1   37.21    8.67
  -6 -10   1   33.72    7.05
  -5 -10   1   54.36    9.85
   5 -10  -1   59.67    9.10
   5  10  -1   79.60   11.72
   5  10  -1   45.72    7.34
  -5 -10   1   41.48    7.52
  -5  10   1   54.97    8.04
  -5  10   1   39.46    6.45
   5 -10  -1   44.88    9.02
   5 -10  -1   46.05    6.37
  -5 -10   1   56.45   10.53
  -4 -10   1   11.13    5.72
   4 -10  -1    9.96    3.81
   4 -10  -1    1.33    3.79
  -4 -10   1    7.53    5.80
   4  10  -1    8.77    3.99
   4  10  -1    8.75    6.20
  -4 -10   1   18.67    5.77
  -4  10   1    4.43    3.15
   4 -10  -1    3.30    4.84
  -4  10   1    4.58    4.84
  -4 -10   1    9.11    2.16
   4 -10  -1   19.40    6.68
  -3 -10   1   22.55    5.83
   3  10  -1   17.47    4.96
   3 -10  -1   15.14    6.49
  -3  10   1   34.58    7.13
   3 -10  -1   20.26    5.25
  -3 -10   1   10.57    5.96
   3  10  -1   14.71    7.06
  -3 -10   1   33.12    8.16
   3 -10  -1   21.36    4.44
  -3  10   1   12.94    4.06
  -3  10   1   33.95    4.83
   3 -10  -1   12.20    5.97
  -3 -10   1   14.76    3.28
  -2 -10   1    1.01    2.29
  -2  10   1    2.14    4.43
  -2  10   1    2.36    2.78
   2 -10  -1    3.04    4.56
  -2 -10   1    6.17    5.43
   2 -10  -1    3.78    3.31
   2  10  -1    7.93    3.83
   2 -10  -1    1.66    3.03
   2  10  -1    0.33    4.74
  -2  10   1    5.37    3.53
   2  10  -1   -2.76    4.28
  -2 -10   1   -0.97    4.57
   2 -10  -1    5.56    4.03
   2 -10  -1    2.69    4.56
   1  10  -1    0.15    2.40
  -1 -10   1    1.81    4.79
   1 -10  -1   -1.48    4.11
   1  10  -1    1.65    5.35
  -1  10   1    5.88    5.46
  -1 -10   1    0.00    2.32
  -1 -10   1    3.06    3.08
   1 -10  -1   -0.30    2.61
   1 -10  -1    4.59    3.25
  -1 -10   1    7.66    5.35
  -1  10   1    2.85    4.43
   1  10  -1   -1.83    4.21
  -1  10   1   -0.03    2.61
   1 -10  -1   -3.59    3.33
   1 -10  -1   -1.66    2.38
   1  10  -1    1.19    2.87
   0 -10   1    4.06    3.08
   0  10   1   12.75    7.02
   0 -10   1    8.25    4.96
   0  10   1    1.78    2.95
   0 -10  -1    2.08    2.43
   0  10   1    1.28    4.35
   0 -10  -1   -1.14    4.01
   0  10  -1   -1.88    4.22
   0  10  -1   -1.23    1.97
   0 -10  -1   -2.43    2.23
   0 -10  -1    8.80    4.04
   0 -10   1   -0.25    4.64
   0 -10   1   -0.69    2.59
   0 -10  -1    1.67    4.75
   0  10  -1    1.69    3.09
   0  10  -1    8.27    5.43
  -1  10  -1    2.85    2.98
  -1 -10  -1    2.47    3.66
   1 -10   1    0.86    3.03
   1 -10   1    2.38    4.49
  -1 -10  -1   -1.92    4.04
  -1  10  -1   -0.51    4.70
  -1  10  -1    5.23    3.10
   1  10   1    0.97    2.84
   1 -10   1    5.65    4.76
  -1  10  -1    3.42    3.06
  -1 -10  -1    2.00    2.32
   1  10   1    6.01    5.34
   1 -10   1   -0.78    2.57
  -1 -10  -1   -2.84    3.91
  -2  10  -1   47.68    6.27
  -2 -10  -1   60.01    9.63
  -2 -10  -1   54.10    9.65
   2 -10   1   52.74    7.91
  -2  10  -1   56.90    6.79
   2 -10   1   53.64    8.96
   2 -10   1   41.36    5.62
   2  10   1   63.14   10.61
   2 -10   1   50.47    9.15
  -2  10  -1   80.36    9.44
  -2  10  -1   72.26    7.91
  -2 -10  -1   44.98    7.39
   2  10   1   34.22    6.19
  -2 -10  -1   50.45    5.16
  -3 -10  -1   -0.31    1.32
  -3  10  -1   -0.87    2.34
  -3  10  -1    1.94    4.49
   3 -10   1    4.38    4.69
   3 -10   1    0.91    3.22
  -3 -10  -1   -4.19    4.05
   3 -10   1    0.55    3.62
   3  10   1    2.23    2.89
  -3 -10  -1    1.33    4.60
   3 -10   1    2.13    4.66
  -3  10  -1    2.04    2.32
  -3 -10  -1    0.00    3.68
   3  10   1    3.49    5.10
  -4  10  -1   -1.24    4.17
   4 -10   1   -4.06    3.47
   4  10   1   -2.97    4.42
   4 -10   1    1.21    4.99
   4  10   1    3.63    3.49
  -4 -10  -1    7.31    5.78
  -4 -10  -1    1.68    3.75
  -4  10  -1    2.79    2.95
   4 -10   1   -2.15    4.48
   4 -10   1   -1.75    3.74
  -4 -10  -1    1.87    4.93
   5 -10   1    5.24    4.92
   5 -10   1    3.25    5.28
   5  10   1    8.49    4.53
   5 -10   1    9.50    5.44
   5  10   1    2.23    5.52
   5 -10   1    8.73    4.34
  -5 -10  -1    7.93    5.50
  -5  10  -1    3.70    4.46
  -5 -10  -1    8.17    4.96
  -5  10  -1    2.92    2.93
  -5 -10  -1    1.94    5.24
   6 -10   1    5.12    4.74
   6 -10   1   -0.89    3.88
   6  10   1    4.56    5.67
   6 -10   1    5.93    5.58
  -6 -10  -1    3.40    5.54
   6 -10   1    6.55    5.07
   6 -10   1    4.76    5.43
  -6 -10  -1    0.88    3.79
  -6  10  -1    7.73    4.68
  -6 -10  -1    3.28    5.48
   6  10   1    1.20    3.43
   6 -10   1    4.03    5.00
  -6  10  -1    8.77    3.74
   6 -10   1    4.84    4.59
   7  10   1   48.89    9.84
  -7  10  -1   39.04    6.27
  -7 -10  -1   42.17    9.93
  -7 -10  -1   42.41    9.84
   7 -10   1   53.75    7.37
   7 -10   1   64.52    9.96
   7 -10   1   43.38    9.04
   7 -10   1   72.50   10.88
   7  10   1   53.04    8.42
  -7  10  -1   47.19    6.71
  -7 -10  -1   42.79    8.09
  -8  10  -1   -1.87    5.08
  -8  10  -1    4.62    3.72
  -8  10  -1   -0.63    5.33
  -8 -10  -1    1.36    5.46
   8  10   1   -2.27    5.26
   8 -10   1    5.19    5.09
  -8 -10  -1   -0.82    4.20
  -8  10  -1    1.31    2.24
   8 -10   1    5.11    5.60
   8 -10   1    7.39    6.14
  -8  10  -1    8.08    5.39
   8  10   1    0.60    4.14
  -8 -10  -1   -3.52    4.79
   8 -10   1   -3.16    4.94
  -9  10  -1   16.31    7.59
  -9  10  -1   26.21    7.73
   9 -10   1   15.77    6.06
   9  10   1   33.33    7.79
  -9 -10  -1    9.11    6.92
  -9  10  -1   21.89    4.77
   9 -10   1   40.00    8.99
  -9 -10  -1   11.74    6.93
  -9  10  -1   15.54    6.72
   9 -10   1   32.14    8.78
   9  10   1   22.82    7.55
  -9 -10  -1   12.09    5.81
  10  10   1    5.09    6.12
 -10  10  -1    0.36    5.64
 -10 -10  -1    2.38    6.65
 -10 -10  -1   10.05    5.51
 -10  10  -1   -0.36    5.57
  10 -10   1   -1.30    5.81
 -10  10  -1    9.05    6.77
 -10  10  -1    0.31    2.47
  -9  11   1   40.89    6.72
   9 -11  -1   57.79   11.33
   9 -11  -1   59.15    8.42
  -9  11   1   24.03    5.48
  -9 -11   1   42.52    8.80
   9  11  -1   63.12   12.18
  -9 -11   1   29.48    9.35
   9 -11  -1   41.09   10.13
  -8 -11   1    4.53    5.28
  -8  11   1   -0.60    4.20
   8  11  -1    0.83    6.03
   8 -11  -1    4.53    6.50
   8 -11  -1    5.00    5.11
   8 -11  -1    9.17    6.85
  -8  11   1    7.30    4.14
  -8 -11   1    1.15    6.38
   7 -11  -1   -1.57    5.32
   7 -11  -1    0.03    5.67
  -7  11   1    1.32    2.72
  -7 -11   1    1.47    5.76
  -7  11   1   -0.14    4.52
  -7 -11   1   -6.78    4.90
   7 -11  -1    3.35    4.62
   7 -11  -1   10.69    5.90
   7  11  -1    5.57    7.20
  -7 -11   1    6.63    5.17
   7  11  -1   -1.70    4.18
   6 -11  -1    7.06    6.25
   6 -11  -1   11.69    4.81
   6 -11  -1    6.15    5.30
   6 -11  -1   22.78    7.94
  -6  11   1   12.70    4.40
  -6 -11   1    5.69    6.28
   6  11  -1   13.98    5.55
  -6  11   1   15.97    6.50
  -6 -11   1   11.46    6.95
   6  11  -1   21.10    8.54
  -5  11   1   37.36    6.54
   5 -11  -1    9.80    6.29
   5  11  -1   22.11    8.94
  -5 -11   1   22.95    6.69
  -5 -11   1    6.65    6.27
   5 -11  -1   20.71    6.30
   5 -11  -1   23.66    7.62
   5 -11  -1   17.55    5.11
   5  11  -1   18.80    5.94
  -5 -11   1   26.65    8.35
  -5  11   1   34.41    7.81
  -4 -11   1   17.61    7.39
   4 -11  -1    9.10    4.10
  -4 -11   1    7.17    2.10
   4 -11  -1    3.97    5.39
  -4  11   1   16.02    6.36
   4  11  -1   10.53    8.09
  -4  11   1   19.26    5.49
   4  11  -1   10.84    4.57
   4 -11  -1    3.66    3.99
  -4 -11   1    0.53    4.50
   4 -11  -1   21.09    7.26
   3 -11  -1   49.93    9.30
   3 -11  -1   47.31    6.08
   3  11  -1   44.51    7.30
  -3 -11   1   62.74    5.85
   3 -11  -1   64.71   10.60
   3  11  -1   57.59   11.43
   3 -11  -1   39.92    7.59
  -3  11   1   56.91    7.52
  -3  11   1   54.51    9.25
  -3 -11   1   40.54    9.58
  -3 -11   1   79.76   11.89
   2  11  -1    7.06    6.72
   2  11  -1   14.28    4.38
   2 -11  -1   15.27    5.16
  -2 -11   1   25.35    7.56
  -2 -11   1   10.07    6.48
  -2 -11   1   10.48    3.62
   2 -11  -1   16.77    7.09
   2 -11  -1   10.98    3.85
   2 -11  -1    7.81    5.79
  -2  11   1    8.97    3.57
   2  11  -1   21.07    5.40
  -2  11   1   16.24    6.82
  -1  11   1    9.26    3.75
  -1 -11   1    4.59    5.19
  -1  11   1    4.04    5.28
  -1 -11   1    9.50    3.90
   1  11  -1    7.49    4.09
   1 -11  -1    4.32    3.55
   1 -11  -1   16.56    6.64
   1 -11  -1    5.77    5.50
  -1 -11   1    7.76    5.55
   1  11  -1   11.56    4.41
   1  11  -1   10.36    6.03
  -1 -11   1    4.84    2.68
   1 -11  -1    1.42    3.03
   1 -11  -1    7.07    5.00
   1  11  -1    6.31    6.87
   0 -11   1   36.00    8.56
   0 -11  -1   27.39    5.45
   0 -11  -1   24.01    7.17
   0  11   1   27.35    7.55
   0 -11   1   18.00    3.92
   0  11  -1   24.75    5.60
   0 -11   1   35.08    8.00
   0  11  -1   30.78    5.80
   0 -11   1   16.49    4.75
   0 -11  -1   25.53    7.35
   0  11   1   26.93    8.51
   0  11   1   25.34    5.39
   0  11  -1   34.59    7.94
   0 -11  -1   29.38    6.53
  -1 -11  -1   28.13    5.00
  -1  11  -1   38.05    6.26
   1  11   1   39.15    6.56
   1 -11   1   40.57    8.90
  -1 -11  -1   53.04    9.88
   1 -11   1   39.13    5.37
   1 -11   1   35.43    6.64
  -1 -11  -1   36.79    7.39
  -1  11  -1   43.37    6.76
   1 -11   1   55.21   10.47
  -1 -11  -1   32.47    8.27
   1  11   1   35.12    9.88
  -1  11  -1   33.50    8.09
   2 -11   1   10.50    6.12
  -2  11  -1    7.45    5.52
   2 -11   1    6.45    5.34
  -2  11  -1   10.75    4.49
  -2 -11  -1    3.54    2.26
   2 -11   1    0.19    3.69
   2 -11   1   11.22    4.04
  -2  11  -1    6.28    3.58
   2  11   1   14.26    4.92
  -2  11  -1    2.13    3.34
  -2 -11  -1    6.67    6.09
  -2 -11  -1   13.61    5.35
  -2 -11  -1    1.63    4.98
   2  11   1    0.93    6.06
   3 -11   1    8.59    5.81
   3  11   1   15.45    5.26
  -3 -11  -1   13.87    5.45
   3  11   1   26.51    8.73
  -3 -11  -1   17.11    6.88
   3 -11   1   14.72    6.18
  -3  11  -1    8.48    6.21
  -3  11  -1   13.56    4.78
  -3 -11  -1   11.76    6.67
   3 -11   1   12.35    4.32
   3 -11   1   11.45    4.97
   4 -11   1    7.52    4.32
   4 -11   1   11.43    6.74
  -4 -11  -1   12.74    7.05
   4  11   1   20.31    6.09
  -4  11  -1   10.44    4.64
  -4 -11  -1   26.99    8.03
  -4  11  -1   15.82    6.45
   4 -11   1   11.81    5.89
   4  11   1   15.44    7.07
  -4 -11  -1   15.85    5.65
   4 -11   1   15.64    6.17
   5  11   1   21.79    8.62
   5 -11   1   29.68    8.28
  -5  11  -1   33.72    7.21
  -5  11  -1   14.74    4.64
   5 -11   1   17.83    6.61
  -5 -11  -1   26.18    8.08
   5  11   1   23.51    6.73
  -5 -11  -1    3.56    5.64
   5 -11   1   18.99    5.41
  -5 -11  -1   17.79    6.43
   5 -11   1   19.21    7.68
  -6 -11  -1   34.62    9.14
  -6 -11  -1   28.39    7.27
  -6 -11  -1   21.10    8.21
  -6  11  -1   28.30    6.56
   6  11   1   30.64    9.34
   6 -11   1   30.38    6.22
  -6  11  -1   23.51    5.25
   6 -11   1   34.08    8.51
   6  11   1   28.04    7.14
   6 -11   1   30.54    8.28
   6 -11   1   30.86    8.37
  -7 -11  -1   36.97    9.93
  -7 -11  -1   25.76    7.26
  -7  11  -1   43.04    7.19
  -7  11  -1   45.78    6.88
   7 -11   1   45.24   10.18
   7 -11   1   63.89   11.25
  -7 -11  -1   58.24   11.47
   7 -11   1   31.20    6.81
   7  11   1   57.97   11.06
  -8 -11  -1    4.14    6.22
  -8 -11  -1   -0.15    4.34
   8 -11   1    2.85    5.24
  -8  11  -1    0.73    3.89
   8  11   1   -1.17    5.98
  -8  11  -1   -0.94    2.70
   8 -11   1   -9.69    5.68
  -9  11  -1    0.03    2.84
  -9 -11  -1    0.53    6.00
   9 -11   1    7.83    5.55
  -9 -11  -1   -0.71    4.83
   7 -12  -1    2.51    5.01
   7 -12  -1    2.78    6.52
  -7 -12   1    8.34    6.60
   7 -12  -1    6.23    6.26
  -7  12   1   14.86    6.50
  -7  12   1   13.45    5.08
   7 -12  -1   18.07    8.21
   7  12  -1   15.36    9.24
  -6  12   1   23.67    7.28
   6 -12  -1   37.10    8.61
   6  12  -1   35.29   11.37
   6 -12  -1   19.85    8.11
  -6 -12   1   13.34    8.01
  -6  12   1   26.31    6.34
   6 -12  -1    9.48    5.23
   6 -12  -1   19.95    8.17
  -5  12   1   11.30    4.62
   5 -12  -1    7.73    6.48
  -5 -12   1   -0.19    6.23
   5 -12  -1   10.47    4.93
  -5  12   1    5.54    5.99
   5  12  -1   15.44    8.47
   5 -12  -1    9.00    5.86
   5 -12  -1   -2.40    5.79
  -5 -12   1    5.55    6.74
  -4 -12   1    0.57    5.94
  -4 -12   1   12.20    6.92
   4 -12  -1    4.57    5.72
   4 -12  -1    2.97    3.92
   4  12  -1    3.85    4.15
   4  12  -1    6.02    7.65
  -4  12   1   -0.40    3.41
   4  12  -1    5.12    3.75
   4 -12  -1   -5.70    5.17
  -4  12   1    6.19    6.09
   4 -12  -1    0.38    4.26
   3 -12  -1    7.93    4.18
  -3 -12   1   -0.65    6.26
  -3 -12   1    2.24    2.60
   3 -12  -1    6.30    4.43
  -3  12   1    3.15    6.27
  -3  12   1    3.92    4.26
   3 -12  -1   16.71    7.12
  -3 -12   1   13.78    7.00
   3  12  -1    1.26    2.99
   3  12  -1   -0.21    3.06
   3 -12  -1    4.09    5.86
   3  12  -1    0.90    6.82
   2 -12  -1    5.02    3.66
   2 -12  -1   13.19    6.66
  -2  12   1    9.40    7.34
  -2 -12   1   11.57    6.86
   2  12  -1    5.31    4.19
   2  12  -1    8.47    4.55
  -2 -12   1    4.79    3.31
   2 -12  -1    2.56    4.25
   2 -12  -1    6.42    6.50
  -2 -12   1    8.42    6.67
  -1  12   1   -0.06    6.05
  -1  12   1    3.62    3.32
   1  12  -1    4.76    4.04
   1 -12  -1    0.23    3.08
   1 -12  -1    4.17    6.03
  -1 -12   1    5.29    6.04
   1  12  -1    2.82    3.78
   1 -12  -1   14.08    6.49
   1 -12  -1   -2.08    3.21
  -1 -12   1   -2.10    2.78
   1  12  -1   -4.08    5.72
  -1 -12   1    7.14    6.28
   0  12   1    6.41    4.03
   0  12   1   19.52    7.61
   0  12  -1   12.15    4.75
   0 -12  -1    0.98    5.29
   0 -12   1    4.22    3.19
   0 -12  -1   13.03    6.47
   0 -12  -1    3.82    3.29
   0 -12   1    7.49    6.47
   0  12  -1    7.62    6.60
   0 -12   1    0.94    3.39
   0 -12   1    7.66    6.26
   0 -12  -1    6.80    5.14
   0  12  -1    5.92    4.01
   1 -12   1    5.41    3.66
   1  12   1   -6.14    5.83
  -1 -12  -1    5.02    3.02
  -1  12  -1   -0.64    5.97
  -1 -12  -1    2.28    5.51
   1 -12   1    8.59    4.81
  -1 -12  -1    7.21    4.71
   1 -12   1   -0.15    5.71
   1 -12   1    0.50    5.72
  -1  12  -1    1.71    2.99
  -1 -12  -1    2.50    6.02
   1  12   1    1.52    3.58
  -1  12  -1    1.66    3.44
  -2 -12  -1   35.11    4.41
   2 -12   1   43.19    7.97
  -2  12  -1   67.13   10.31
   2 -12   1   42.29    6.04
  -2  12  -1   49.54    8.12
   2 -12   1   45.24    9.89
   2  12   1   39.06   11.12
  -2 -12  -1   45.44    9.89
   2  12   1   41.45    7.46
  -2 -12  -1   47.62   10.42
   2 -12   1   28.95    8.79
  -2 -12  -1   40.34    7.95
  -3 -12  -1    9.02    7.19
  -3 -12  -1   10.17    7.64
   3  12   1   26.27    9.82
   3 -12   1    4.04    4.73
   3  12   1   18.08    5.75
   3 -12   1    8.42    6.46
   3 -12   1   21.57    8.04
  -3  12  -1   20.28    5.85
   3 -12   1   13.47    4.76
  -3  12  -1   27.94    7.78
  -3 -12  -1   18.18    6.53
   4  12   1   34.30    9.79
  -4 -12  -1   30.73    9.24
  -4 -12  -1   25.46    7.52
   4 -12   1   26.62    8.63
  -4 -12  -1   33.51    9.55
   4 -12   1   35.40    9.49
   4  12   1   29.42    7.34
   4 -12   1   33.54    6.04
   4 -12   1   32.73    8.21
  -4  12  -1   28.05    6.49
  -5  12  -1   -1.11    3.38
  -5  12  -1    0.85    5.20
   5 -12   1    7.43    6.83
   5 -12   1    1.67    5.12
  -5 -12  -1    4.83    6.88
   5  12   1   -1.09    6.95
   5 -12   1   -3.72    4.03
  -5 -12  -1    4.34    5.08
   5 -12   1    0.72    6.02
  -6  12  -1   31.43    6.41
   6 -12   1   70.34   11.96
   6 -12   1   55.54    9.89
  -6 -12  -1   46.57   11.11
   6 -12   1   44.54    7.60
   6 -12   1   59.52   11.19
  -6  12  -1   25.78    7.22
  -6 -12  -1   41.74    8.99
   6  12   1   30.45   10.64
   7 -12   1   10.54    5.97
   7 -12   1    2.96    6.71
  -7 -12  -1   -2.12    5.33
  -7  12  -1    1.63    3.36
  -7 -12  -1   -3.10    5.00
   4 -13  -1    7.72    6.92
  -4 -13   1    6.54    7.06
   4  13  -1    1.42    8.70
   4  13  -1    0.48    3.69
   3 -13  -1   -3.67    3.88
   3 -13  -1   10.39    6.91
   3 -13  -1    3.61    4.41
  -3 -13   1    2.09    2.55
  -3  13   1   -0.86    6.70
   3  13  -1    3.66    4.19
  -3 -13   1    1.49    6.92
   2 -13  -1   -2.32    3.81
  -2 -13   1    8.63    3.57
  -2 -13   1   13.72    7.79
   2 -13  -1    9.26    6.96
  -2  13   1   19.75    7.98
   2 -13  -1    4.67    4.59
   2  13  -1    5.24    4.46
  -1  13   1    8.67    4.98
   1  13  -1    7.70    4.79
  -1 -13   1   -1.16    3.41
  -1 -13   1    6.97    6.76
  -1  13   1   -0.68    7.12
   1  13  -1    1.17    7.86
   1  13  -1    0.45    3.93
   1 -13  -1    3.05    6.31
   1 -13  -1    7.13    4.23
   0  13   1   37.21    9.88
   0 -13  -1   14.07    4.48
   0  13   1   11.27    4.61
   0 -13   1   16.35    5.26
   0  13  -1   26.12    6.45
   0 -13   1    6.96    7.22
   0 -13  -1   19.27    8.45
   0  13  -1   17.75    5.74
   0  13  -1   23.14    9.27
   0  13   1   21.01    6.36
   1  13   1   -1.85    3.61
  -1  13  -1   -5.16    6.00
   1 -13   1   -1.28    3.36
   1 -13   1    2.52    3.77
  -1  13  -1    0.81    4.30
  -1 -13  -1    5.64    7.02
   1 -13   1    5.69    6.83
  -1 -13  -1   -2.27    2.68
   2 -13   1   11.08    7.49
   2 -13   1    4.99    4.18
  -2  13  -1    8.44    7.84
  -2 -13  -1    1.92    2.35
   2 -13   1   14.55    7.68
  -2 -13  -1    2.65    6.26
   2 -13   1    1.39    3.96
  -2 -13  -1    0.73    5.44
   3  13   1    1.79    8.47
   3 -13   1   -0.47    4.29
   3 -13   1    4.90    6.77
  -3 -13  -1   17.20    6.68
  -3 -13  -1    9.44    7.66
  -3  13  -1   14.01    5.89
   3 -13   1    6.37    5.47
 -17   0   2   17.54    7.68
 -17   0   2   20.30    7.42
 -17   0   2   17.54    7.82
 -17   0   2   14.57    7.49
  16   0  -2   27.83    5.99
 -16   0   2   17.64    6.98
  16   0  -2   18.10    7.72
 -16   0   2   24.52    7.67
 -16   0   2   40.21    9.07
 -16   0   2   23.71    7.24
 -16   0   2   34.96    8.62
 -15   0   2    3.58    5.38
 -15   0   2   -5.59    4.03
 -15   0   2   -2.49    4.42
  15   0  -2    0.89    3.29
  15   0  -2    2.42    5.05
 -15   0   2    3.08    4.80
 -15   0   2    4.80    5.30
 -14   0   2    3.91    4.40
 -14   0   2    3.42    4.68
  14   0  -2   -0.40    3.16
  14   0  -2    3.24    5.12
 -14   0   2   -0.46    3.65
 -14   0   2   10.39    5.22
 -14   0   2   -2.97    3.90
 -13   0   2  138.11   13.42
 -13   0   2  115.09   12.46
 -13   0   2  129.25   12.62
 -13   0   2  102.19   11.96
 -13   0   2  126.07   12.26
  13   0  -2  114.90   12.59
  13   0  -2  120.21    9.45
  12   0  -2  151.38   13.57
  12   0  -2  143.77   10.20
 -12   0   2  153.28   13.34
 -12   0   2  152.88   12.80
 -12   0   2  143.31   12.59
 -12   0   2  151.95   13.27
 -12   0   2  122.67   12.56
 -11   0   2  546.67   30.64
  11   0  -2  580.73   31.38
  11   0  -2  612.30   29.23
 -11   0   2  549.50   30.24
 -11   0   2  547.73   30.39
 -11   0   2  565.65   31.46
 -11   0   2  585.77   30.91
  10   0  -2   36.32    4.38
 -10   0   2   36.10    6.07
  10   0  -2   29.33    3.41
 -10   0   2   32.59    5.93
 -10   0   2   29.68    5.72
 -10   0   2   34.30    6.16
  10   0  -2   33.38    6.26
 -10   0   2   27.50    5.30
   9   0  -2    2.13    2.61
  -9   0   2    1.67    2.28
  -9   0   2    1.87    2.32
   9   0  -2    3.71    1.92
  -9   0   2    1.72    2.42
  -9   0   2    1.33    2.19
  -9   0   2   -0.89    2.10
   9   0  -2    0.02    1.28
   9   0  -2    4.51    3.19
  -8   0   2   32.26    5.19
  -8   0   2   28.22    4.29
   8   0  -2   26.20    2.75
   8   0  -2   24.10    3.81
   8   0  -2   29.06    5.07
  -8   0   2   26.32    4.78
  -8   0   2   25.58    4.79
   8   0  -2   30.09    3.42
  -8   0   2   30.49    4.87
  -7   0   2   16.73    3.11
   7   0  -2   10.83    2.23
  -7   0   2   16.85    3.44
  -7   0   2   11.96    3.08
  -7   0   2    7.27    2.93
   7   0  -2   11.75    2.90
   7   0  -2   14.49    1.91
  -7   0   2    8.39    2.75
  -6   0   2  118.07    7.44
  -6   0   2  109.34    7.84
   6   0  -2  124.66    7.12
  -6   0   2  119.99    8.14
   6   0  -2  117.95    6.35
  -6   0   2  115.99    7.76
   6   0  -2  109.23    7.61
  -6   0   2  113.48    7.73
  -5   0   2   96.90    6.05
   5   0  -2   91.23    5.87
   5   0  -2   98.71    5.27
  -5   0   2  100.94    6.62
   5   0  -2   93.12    6.42
   4   0  -2  448.81   22.67
  -4   0   2  471.11   22.15
  -4   0   2  477.48   19.84
   4   0  -2  461.04   20.42
   4   0  -2  462.86   21.17
  -4   0   2  459.02   22.33
   4   0  -2  472.16   22.20
   3   0  -2 2502.11  113.94
  -3   0   2 2451.22  110.67
  -3   0   2 2603.36  114.25
   3   0  -2 2509.19  108.87
   3   0  -2 2437.36  110.66
   3   0  -2 2576.82  114.44
  -3   0   2 2514.61  108.49
   3   0  -2 2586.01  108.46
  -3   0   2 2624.26  108.32
   2   0  -2   65.71    3.97
   2   0  -2   63.49    4.25
   2   0  -2   53.76    3.80
  -2   0   2   57.51    3.62
   2   0  -2   67.05    3.48
  -2   0   2   70.63    4.32
  -2   0   2   60.52    3.50
   2   0  -2   62.72    3.68
   1   0  -2  124.34    5.70
   1   0  -2  124.15    6.23
   1   0  -2  113.53    6.24
  -1   0   2  113.30    5.75
   1   0  -2  108.81    5.82
  -1   0   2  100.62    5.73
  -1   0   2  114.70    6.27
  -1   0   2  115.00    5.80
   1   0  -2  125.16    5.78
  -1   0   2  129.93    6.26
   0   0  -2  610.67   26.02
   0   0   2  579.55   25.92
   0   0  -2  598.74   27.34
   0   0   2  602.31   26.14
   0   0   2  638.69   27.87
   0   0   2  581.67   26.83
   0   0  -2  602.81   27.62
   0   0   2  556.69   27.62
   0   0  -2  624.39   26.01
  -1   0  -2 8936.53  386.39
   1   0   2 8877.81  396.89
   1   0   2 9254.45  384.75
   1   0   2 8754.96  377.08
   1   0   2 8643.34  396.90
  -2   0  -2  865.52   38.94
  -2   0  -2  876.81   37.44
   2   0   2  814.02   37.34
  -2   0  -2  850.01   38.90
  -3   0  -2  623.52   28.88
  -3   0  -2  602.38   27.52
  -3   0  -2  603.99   29.09
  -3   0  -2  606.85   28.44
  -4   0  -2  353.17   17.90
  -4   0  -2  354.90   17.62
  -4   0  -2  367.40   18.77
  -4   0  -2  377.03   19.08
  -5   0  -2  904.09   41.89
  -5   0  -2  909.74   41.64
  -5   0  -2  922.77   43.64
  -5   0  -2  924.67   42.46
  -5   0  -2  909.69   43.29
  -5   0  -2  924.45   42.22
  -6   0  -2  437.79   24.97
  -6   0  -2  472.51   24.90
  -6   0  -2  497.75   23.75
  -6   0  -2  510.54   25.70
  -6   0  -2  486.82   24.69
  -6   0  -2  514.94   24.40
  -6   0  -2  491.92   23.85
  -7   0  -2    3.28    2.83
  -7   0  -2   15.25    3.97
  -7   0  -2   14.02    3.65
  -7   0  -2   11.97    3.80
  -7   0  -2   12.73    2.81
  -7   0  -2   12.32    3.40
  -7   0  -2   15.57    4.06
   8   0   2   31.18    3.05
  -8   0  -2   37.11    6.37
  -8   0  -2   32.70    6.03
  -8   0  -2   28.15    5.39
  -8   0  -2   36.90    5.52
  -8   0  -2   30.41    4.17
  -8   0  -2   25.43    3.77
  -8   0  -2   32.91    5.08
  -8   0  -2   38.66    6.28
   8   0   2   29.09    2.87
  -9   0  -2  635.63   29.48
  -9   0  -2  610.07   28.25
   9   0   2  617.41   28.49
  -9   0  -2  575.95   31.27
  -9   0  -2  569.31   31.59
  -9   0  -2  598.01   30.07
  -9   0  -2  557.65   31.99
  -9   0  -2  606.30   32.40
   9   0   2  606.83   28.84
 -10   0  -2    1.41    3.36
 -10   0  -2    5.49    3.98
 -10   0  -2    1.52    3.44
 -10   0  -2    2.06    3.36
 -10   0  -2    8.83    4.86
  10   0   2    3.14    1.90
 -10   0  -2    4.59    2.54
 -11   0  -2   25.19    6.60
 -11   0  -2   28.13    6.92
  11   0   2   25.35    3.46
 -11   0  -2   38.70    7.45
  11   0   2   29.30    6.54
 -11   0  -2   36.10    7.51
 -11   0  -2   34.83    6.51
  12   0   2   13.99    3.15
  12   0   2    3.88    4.32
 -12   0  -2   11.88    5.43
 -12   0  -2    1.45    3.84
 -12   0  -2    5.11    4.20
 -12   0  -2    9.02    4.47
 -12   0  -2    5.62    4.58
 -13   0  -2   62.70   10.81
 -13   0  -2   73.35   10.86
  13   0   2   78.40   10.34
 -13   0  -2   58.87    9.18
 -13   0  -2   63.15   10.05
 -13   0  -2   66.41   10.46
  13   0   2   69.97    6.24
 -14   0  -2   15.01    6.64
  14   0   2   26.83    4.51
 -14   0  -2   30.22    8.29
  14   0   2   17.30    7.03
 -14   0  -2   16.71    6.54
 -14   0  -2    9.54    5.77
 -14   0  -2   26.15    6.74
  15   0   2  134.22   10.00
 -15   0  -2  126.91   15.34
 -15   0  -2  122.29   14.99
 -15   0  -2  137.93   16.08
 -15   0  -2  139.23   14.31
 -15   0  -2  127.83   15.73
 -16   0  -2   -1.09    5.33
 -16   0  -2    6.23    6.35
 -16   0  -2   -7.33    4.18
 -16   0  -2    7.71    6.60
  16   0   2    0.11    3.48
 -17  -1   2    1.22    5.71
 -17   1   2    2.43    5.41
 -17  -1   2    1.36    5.87
 -17   1   2    2.22    5.11
 -17  -1   2   -0.48    5.28
 -17   1   2    6.65    5.83
 -17  -1   2   -8.87    4.79
 -16  -1   2   -4.59    4.21
 -16  -1   2    0.44    4.49
 -16   1   2    0.83    5.38
 -16   1   2    5.80    5.78
  16  -1  -2    1.77    4.00
 -16  -1   2    4.66    5.18
  16   1  -2   16.38    7.18
 -16   1   2   16.61    6.90
  16   1  -2   -2.65    3.68
 -16  -1   2   -2.33    4.76
 -16   1   2   -1.03    5.28
 -16   1   2   -1.67    4.78
  16  -1  -2   -0.65    5.00
 -16  -1   2   -1.69    4.40
 -15  -1   2   13.97    6.41
  15   1  -2   15.73    6.70
 -15   1   2   18.24    6.25
 -15   1   2    9.68    5.66
 -15  -1   2   11.82    5.62
  15  -1  -2   18.20    7.26
 -15   1   2   27.37    7.91
 -15   1   2   13.95    6.01
 -15   1   2   13.99    5.96
  15   1  -2   13.58    4.35
 -15  -1   2   12.28    5.52
 -15  -1   2   15.82    6.26
 -15  -1   2   13.81    5.85
  15  -1  -2   21.50    5.14
 -14   1   2    4.87    4.86
 -14   1   2    2.41    4.27
  14   1  -2    5.14    3.35
 -14  -1   2    3.89    4.68
 -14   1   2    5.98    4.50
 -14   1   2    9.65    5.24
 -14  -1   2    5.82    4.51
  14  -1  -2    0.81    4.04
  14   1  -2    7.78    5.61
 -14   1   2    1.87    3.92
  14  -1  -2    7.17    3.63
 -14  -1   2    6.51    5.12
 -14  -1   2    4.26    4.42
 -14  -1   2    4.79    4.45
  13  -1  -2   50.26    6.30
 -13   1   2   58.15    8.90
 -13  -1   2   54.81    8.86
 -13  -1   2   43.06    7.72
 -13   1   2   53.46    9.20
  13  -1  -2   48.89    8.64
 -13  -1   2   33.45    7.80
  13   1  -2   47.07    8.83
 -13   1   2   57.29    9.34
 -13  -1   2   48.69    8.61
 -13  -1   2   64.35    9.26
 -13   1   2   53.27    8.50
 -13   1   2   36.50    7.57
  13   1  -2   44.48    5.77
 -12  -1   2   -1.57    3.11
  12   1  -2    2.92    2.69
 -12   1   2    5.70    3.76
  12  -1  -2    2.91    4.05
 -12  -1   2    7.55    4.81
 -12  -1   2   -1.03    3.89
 -12   1   2   -1.73    3.17
  12  -1  -2    4.36    2.99
 -12   1   2    6.48    4.28
 -12   1   2    0.02    3.98
 -12  -1   2   -1.72    3.17
 -12   1   2    2.28    3.41
 -12  -1   2    4.15    3.94
  11   1  -2    9.06    2.87
 -11   1   2   13.19    4.28
 -11  -1   2   12.47    4.81
 -11  -1   2    4.17    3.92
 -11   1   2   17.51    5.42
 -11  -1   2   12.19    4.55
 -11   1   2    8.20    4.10
  11  -1  -2    5.95    3.72
 -11  -1   2    5.01    3.96
 -11   1   2    6.86    3.70
 -11   1   2   11.18    4.24
 -11  -1   2   10.16    4.23
  11  -1  -2    6.41    3.10
 -11  -1   2   23.10    4.99
  10   1  -2    1.23    1.85
 -10   1   2    5.31    3.48
 -10  -1   2    0.34    3.21
  10  -1  -2    0.62    1.88
 -10   1   2   -1.48    2.16
 -10  -1   2   -1.64    1.96
 -10  -1   2    0.45    2.69
 -10  -1   2   -0.66    2.30
 -10   1   2    2.89    2.94
 -10   1   2   -0.59    2.44
  10   1  -2    0.53    1.74
 -10  -1   2    0.60    2.64
 -10  -1   2    8.74    4.09
 -10  -1   2    0.75    2.64
 -10   1   2   -0.83    2.57
  10  -1  -2    1.77    3.08
   9  -1  -2   13.29    2.90
   9   1  -2    9.50    2.44
  -9  -1   2   10.47    3.87
  -9  -1   2   12.44    3.52
  -9   1   2   17.83    4.26
   9   1  -2   12.93    3.41
  -9  -1   2   21.78    5.25
  -9  -1   2    9.33    3.41
  -9  -1   2    5.09    2.99
   9   1  -2   10.37    2.38
  -9  -1   2   13.85    2.84
  -9  -1   2    7.99    3.19
  -9   1   2   12.66    3.96
   9  -1  -2   11.82    1.80
  -9   1   2   10.82    3.77
  -9   1   2    6.57    2.99
   9  -1  -2   12.91    3.84
  -9   1   2    9.48    3.58
  -8  -1   2   26.60    4.07
  -8   1   2   15.89    3.85
  -8   1   2   28.68    4.42
   8  -1  -2   14.76    3.86
   8  -1  -2   26.52    4.39
  -8   1   2   25.04    4.75
  -8   1   2   15.69    3.78
  -8  -1   2   19.61    4.49
  -8  -1   2   23.82    4.49
  -8  -1   2   18.41    4.50
  -8  -1   2   27.32    4.56
   8   1  -2   20.27    2.86
   8  -1  -2   24.72    2.14
   8   1  -2   28.88    3.81
  -8  -1   2   16.52    3.84
   8  -1  -2   17.48    3.10
   8   1  -2   25.68    3.11
  -8   1   2   22.36    4.53
   7  -1  -2  341.32   16.36
   7   1  -2  364.57   18.47
  -7  -1   2  369.61   19.29
   7  -1  -2  365.48   18.32
  -7   1   2  355.76   19.14
  -7  -1   2  352.87   18.58
  -7  -1   2  350.98   19.45
   7  -1  -2  357.93   19.34
   7   1  -2  350.38   17.92
  -7   1   2  348.42   19.43
  -7  -1   2  365.68   18.55
   7   1  -2  352.58   17.43
  -7  -1   2  360.37   19.20
  -7   1   2  339.62   18.80
  -7   1   2  333.91   18.68
  -7  -1   2  386.54   18.58
  -7   1   2  366.49   18.87
   7  -1  -2  369.34   19.39
   6   1  -2  322.16   16.44
  -6  -1   2  337.97   16.97
  -6  -1   2  328.02   17.31
   6   1  -2  317.34   15.93
   6  -1  -2  345.90   15.05
  -6  -1   2  322.36   17.69
   6   1  -2  303.95   16.78
   6  -1  -2  302.87   17.49
   6  -1  -2  326.77   15.06
  -6   1   2  339.15   17.08
   6  -1  -2  313.47   17.32
  -6   1   2  342.75   17.38
  -6   1   2  320.64   17.15
  -6  -1   2  330.84   16.78
  -6   1   2  346.06   14.26
  -6  -1   2  325.65   17.32
  -6  -1   2  361.05   16.75
   6  -1  -2  328.42   16.75
  -6   1   2  320.19   17.62
   6  -1  -2  323.34   15.03
  -6   1   2  322.75   17.07
  -5  -1   2  299.50   15.94
  -5   1   2  321.07   15.95
  -5   1   2  306.69   15.71
   5   1  -2  281.69   14.89
   5  -1  -2  291.35   13.69
  -5  -1   2  302.92   14.76
   5   1  -2  304.89   15.38
  -5   1   2  287.71   13.51
   5  -1  -2  303.81   15.75
   5   1  -2  292.23   14.41
  -5   1   2  314.76   13.29
   5  -1  -2  303.08   15.27
  -5   1   2  297.31   15.19
  -5  -1   2  301.34   15.40
   5  -1  -2  288.60   15.92
   5  -1  -2  294.80   13.68
  -4   1   2  222.57   11.60
   4   1  -2  224.08   11.98
  -4   1   2  228.16   12.07
  -4   1   2  254.56   10.50
  -4   1   2  219.63   10.52
  -4   1   2  232.70   12.41
   4   1  -2  224.21   11.30
  -4  -1   2  217.05   11.71
   4  -1  -2  233.83   10.70
  -4   1   2  234.06   10.32
   4   1  -2  219.11   11.68
   4  -1  -2  228.74   12.58
   4  -1  -2  233.99   12.22
  -4  -1   2  216.26   12.24
   4  -1  -2  222.41   10.67
   4  -1  -2  249.15   12.00
  -4   1   2  217.85   10.46
   3   1  -2  229.35   12.14
  -3   1   2  242.41   11.19
  -3  -1   2  237.92   11.86
  -3   1   2  236.13   11.97
  -3   1   2  229.14   11.32
   3  -1  -2  241.77   12.24
   3   1  -2  230.47   11.65
   3  -1  -2  212.80   12.63
  -3  -1   2  231.13   10.49
   3  -1  -2  243.45   11.35
   3  -1  -2  239.70   11.18
   3   1  -2  237.61   12.37
  -3   1   2  239.10   12.72
   3  -1  -2  251.65   12.27
  -3  -1   2  253.86   12.46
  -3  -1   2  246.73   12.17
   3   1  -2  242.02   10.92
   2  -1  -2 9343.52  391.89
  -2   1   2 8633.94  401.66
  -2  -1   2 9062.23  394.31
  -2   1   2 8998.19  399.93
   2   1  -2 8976.37  401.60
  -2  -1   2 9458.25  392.03
   2   1  -2 9477.99  412.61
  -2   1   2 9163.35  412.83
   2   1  -2 9451.37  394.32
  -2  -1   2 9588.06  412.60
  -2   1   2 8835.01  394.55
   2  -1  -2 9415.64  402.07
  -2  -1   2 9379.02  400.01
   2   1  -2 9832.01  412.72
   1  -1  -2 2594.88  112.75
  -1   1   2 2621.13  111.53
  -1  -1   2 2641.67  110.82
  -1  -1   2 2518.82  116.84
  -1  -1   2 2508.55  113.15
   1  -1  -2 2643.17  113.87
   1  -1  -2 2702.48  116.65
   1   1  -2 2573.73  113.65
   1  -1  -2 2563.58  111.21
  -1   1   2 2650.22  116.60
  -1  -1   2 2577.29  111.36
  -1   1   2 2566.23  112.80
   1  -1  -2 2664.30  110.91
   1   1  -2 2543.63  111.37
   0  -1  -2   41.92    2.59
   0   1  -2   34.75    2.68
   0   1   2   35.58    2.51
   0  -1   2   29.91    2.74
   0  -1  -2   38.44    2.65
   0  -1   2   39.17    2.51
   0   1   2   37.50    2.14
   0   1   2   39.25    2.86
   0   1  -2   36.89    2.08
   0   1  -2   42.67    3.12
   0  -1  -2   38.46    3.05
   0   1   2   34.53    2.10
   0  -1   2   35.97    2.99
   0  -1   2   36.10    2.86
   0   1  -2   37.17    2.52
   0  -1   2   36.51    2.11
   0  -1  -2   35.38    2.15
  -1  -1  -2 5601.51  237.25
   1   1   2 5452.96  244.77
   1  -1   2 5270.40  232.72
  -1   1  -2 5838.71  244.86
   1   1   2 5401.18  244.92
   1  -1   2 5501.76  244.77
   1  -1   2 5409.80  233.61
  -1   1  -2 5190.91  232.53
   1  -1   2 5532.90  237.69
  -1  -1  -2 5509.24  238.72
   1  -1   2 5438.36  244.57
  -1   1  -2 5523.16  238.38
  -1  -1  -2 5500.77  232.31
   2  -1   2  382.38   19.43
  -2  -1  -2  397.11   18.99
  -2  -1  -2  415.99   19.83
   2  -1   2  389.43   19.63
  -2  -1  -2  420.80   19.29
   2  -1   2  416.88   18.37
  -2   1  -2  413.67   19.38
   2  -1   2  423.60   18.30
  -2   1  -2  413.78   19.90
  -3  -1  -2  368.83   17.61
  -3  -1  -2  344.20   17.38
  -3  -1  -2  366.22   17.05
  -3  -1  -2  354.79   17.24
  -3   1  -2  357.49   16.96
  -3   1  -2  333.85   17.87
   3  -1   2  349.83   16.24
   3  -1   2  329.17   16.97
  -3   1  -2  358.92   17.90
   3  -1   2  317.97   16.73
  -4   1  -2  256.59   14.13
  -4  -1  -2  250.04   13.23
  -4   1  -2  259.39   14.17
  -4  -1  -2  271.50   13.93
   4  -1   2  223.00   12.61
   4  -1   2  251.76   12.67
  -4   1  -2  243.17   12.73
  -4  -1  -2  252.68   13.54
  -4  -1  -2  247.38   13.29
   4  -1   2  241.34   12.47
  -5  -1  -2  441.26   21.52
   5  -1   2  432.25   20.83
  -5   1  -2  424.25   22.39
  -5  -1  -2  455.28   21.48
  -5  -1  -2  419.52   22.01
  -5  -1  -2  417.59   21.24
  -5   1  -2  398.59   22.17
  -5  -1  -2  409.57   21.77
  -5   1  -2  437.02   20.76
  -5   1  -2  410.49   21.56
   5  -1   2  429.58   20.93
   5  -1   2  411.98   20.49
  -5   1  -2  449.87   22.24
  -5  -1  -2  433.92   21.55
  -6   1  -2  489.49   24.65
  -6  -1  -2  475.15   25.00
  -6   1  -2  487.30   23.20
   6  -1   2  489.92   23.78
  -6  -1  -2  473.63   24.34
  -6  -1  -2  468.53   24.82
   6  -1   2  461.55   23.12
  -6   1  -2  449.72   24.68
  -6  -1  -2  494.52   23.93
  -6  -1  -2  502.56   23.84
  -6   1  -2  473.58   25.32
  -6  -1  -2  479.53   24.15
   6  -1   2  485.83   23.56
  -6   1  -2  492.57   23.31
  -6  -1  -2  481.96   23.13
  -6  -1  -2  463.83   24.21
  -6   1  -2  502.81   25.64
  -7   1  -2  253.73   15.69
  -7  -1  -2  233.06   15.12
  -7   1  -2  239.78   13.87
  -7   1  -2  262.99   13.38
   7  -1   2  234.46   14.15
   7  -1   2  236.09   13.38
  -7  -1  -2  259.49   15.42
  -7  -1  -2  254.06   14.98
  -7   1  -2  238.58   15.09
  -7   1  -2  216.36   15.23
  -7  -1  -2  253.83   13.58
  -7  -1  -2  245.05   14.43
  -7  -1  -2  238.24   14.71
   7  -1   2  251.55   13.04
  -7  -1  -2  274.35   15.40
  -7   1  -2  245.34   15.36
  -7  -1  -2  264.89   14.09
  -8  -1  -2   43.09    6.28
  -8  -1  -2   50.34    6.94
  -8   1  -2   50.94    7.34
  -8  -1  -2   47.57    6.25
  -8  -1  -2   49.49    6.83
   8  -1   2   51.20    5.10
  -8   1  -2   50.96    5.97
  -8  -1  -2   50.41    7.04
  -8   1  -2   51.55    4.81
  -8   1  -2   51.39    7.18
  -8  -1  -2   53.08    5.32
  -8   1  -2   55.15    7.16
   8  -1   2   48.69    6.20
   8  -1   2   43.84    4.33
  -8   1  -2   56.32    7.34
  -8  -1  -2   53.95    5.51
  -8  -1  -2   65.46    7.39
  -9   1  -2   17.05    4.87
  -9   1  -2   24.30    5.49
  -9  -1  -2   14.88    4.70
  -9  -1  -2   31.20    6.07
  -9  -1  -2   17.93    3.90
  -9   1  -2   27.83    5.13
   9  -1   2   22.30    4.81
  -9  -1  -2    9.48    4.20
  -9   1  -2   13.88    3.11
  -9  -1  -2   21.92    5.27
  -9  -1  -2   20.95    4.83
  -9   1  -2   23.70    5.38
   9  -1   2   23.18    3.40
  -9  -1  -2   19.97    4.93
  -9   1  -2   13.46    4.90
  -9  -1  -2   28.04    4.20
 -10   1  -2  346.92   21.68
 -10  -1  -2  335.95   21.48
 -10  -1  -2  338.81   21.27
  10  -1   2  389.86   21.50
 -10  -1  -2  351.11   22.04
 -10  -1  -2  355.68   19.35
  10  -1   2  376.78   18.95
 -10  -1  -2  299.48   21.22
 -10   1  -2  386.42   20.65
 -10  -1  -2  345.64   21.31
 -10  -1  -2  373.12   18.86
 -10  -1  -2  355.84   20.88
 -10   1  -2  376.52   22.59
 -10   1  -2  370.44   22.78
 -10   1  -2  349.24   21.96
 -11  -1  -2   66.40    8.80
 -11  -1  -2   71.36    8.80
 -11   1  -2   75.98    9.96
  11  -1   2   60.99    8.30
 -11   1  -2   52.27    8.53
  11   1   2   55.59    4.47
 -11   1  -2   66.80    8.29
 -11  -1  -2   70.70    9.62
 -11  -1  -2   51.71    8.79
  11  -1   2   68.78    6.09
 -11   1  -2   48.40    8.47
 -11   1  -2   66.63   10.01
 -11  -1  -2   65.65    9.28
 -11  -1  -2   69.19    9.56
 -12  -1  -2    0.60    3.90
 -12  -1  -2    5.60    4.48
  12  -1   2    6.25    2.82
  12   1   2    0.61    1.97
 -12   1  -2    3.43    4.51
 -12   1  -2   -1.45    3.81
 -12  -1  -2   -0.47    3.71
 -12   1  -2    2.75    4.15
 -12  -1  -2   -0.39    3.62
 -12   1  -2    1.26    3.94
 -12   1  -2   -2.14    3.81
 -12  -1  -2    1.42    4.00
  12  -1   2    6.85    4.18
 -12  -1  -2    1.60    3.90
 -13   1  -2    6.68    5.42
  13   1   2    7.29    2.54
  13  -1   2    3.80    3.07
 -13   1  -2    3.83    4.72
 -13   1  -2    0.11    4.08
 -13  -1  -2    9.91    4.88
 -13   1  -2    4.85    5.14
 -13  -1  -2    8.61    5.15
 -13  -1  -2    9.68    5.10
  13  -1   2   16.77    6.29
 -13  -1  -2    5.19    5.07
 -13   1  -2    9.07    5.08
 -13  -1  -2   10.17    5.43
 -14  -1  -2    6.04    5.12
  14  -1   2    6.13    5.87
 -14  -1  -2   10.86    5.34
 -14  -1  -2   14.75    6.73
 -14   1  -2    8.74    6.05
 -14   1  -2   10.34    6.04
 -14   1  -2    9.74    6.30
 -14   1  -2    7.65    5.33
 -14  -1  -2    7.51    5.94
  14   1   2    3.61    5.20
  14   1   2    6.33    2.96
  14  -1   2    6.31    3.51
 -14  -1  -2    4.34    4.96
 -14   1  -2   10.20    5.79
  15  -1   2   26.43    5.51
 -15  -1  -2   43.38    9.54
 -15   1  -2   50.33   10.75
 -15  -1  -2   29.74    8.98
 -15   1  -2   31.29    8.85
  15   1   2   30.61    8.71
  15   1   2   27.87    4.60
 -15  -1  -2   29.92    8.14
 -15   1  -2   33.53    9.11
 -15  -1  -2   25.32    7.78
 -15   1  -2   33.88    9.28
 -15   1  -2   34.37    7.93
 -15  -1  -2   39.44    9.21
 -16   1  -2    6.73    6.23
 -16  -1  -2    1.87    5.72
 -16   1  -2    5.38    6.27
 -16   1  -2    1.92    5.88
 -16  -1  -2   15.12    7.10
 -16  -1  -2    1.26    5.66
 -16  -1  -2    4.68    5.54
  16   1   2    4.80    3.73
 -17   2   2   25.66    8.10
 -17   2   2    6.67    6.23
 -17  -2   2   16.92    7.68
 -17  -2   2   14.25    7.74
  17  -2  -2   19.14    8.36
 -17  -2   2    4.98    5.24
 -17   2   2    7.66    6.52
 -16  -2   2    8.00    5.89
  16   2  -2    6.80    6.48
 -16  -2   2   -0.15    5.36
  16  -2  -2   14.98    7.22
 -16   2   2    8.63    5.35
 -16  -2   2   15.31    6.77
 -16   2   2    9.91    6.25
 -16   2   2    2.34    5.33
  16  -2  -2    6.94    5.01
  16   2  -2    9.36    4.75
 -16   2   2    1.05    5.17
  16  -2  -2    2.00    5.83
 -16  -2   2   11.55    6.55
 -16  -2   2    6.01    6.01
 -15   2   2   15.64    6.69
  15  -2  -2   18.06    5.43
 -15  -2   2   19.29    6.72
 -15  -2   2   25.24    7.27
 -15   2   2   14.14    6.28
 -15  -2   2   19.26    7.11
  15   2  -2   14.01    4.29
 -15   2   2   13.91    6.24
 -15   2   2    9.33    5.45
  15  -2  -2   25.61    7.68
  15  -2  -2   19.50    7.37
 -15  -2   2   13.87    6.06
 -15  -2   2   22.79    7.24
 -14   2   2   15.82    6.10
 -14  -2   2   21.58    6.56
 -14  -2   2   10.80    5.47
 -14   2   2   17.17    6.66
 -14  -2   2    6.85    4.46
  14  -2  -2   11.83    4.36
  14  -2  -2   20.80    6.31
 -14  -2   2   16.90    5.93
  14   2  -2   18.32    4.50
 -14  -2   2   16.88    5.97
 -14   2   2   10.98    5.49
 -14  -2   2   11.98    5.64
 -14   2   2   16.20    5.85
 -13  -2   2   -2.29    4.14
 -13  -2   2    7.40    4.85
 -13  -2   2    3.07    4.05
 -13  -2   2    8.37    4.69
 -13  -2   2   -0.39    3.57
  13   2  -2    9.35    3.56
 -13  -2   2    0.27    3.47
  13  -2  -2   -0.77    4.02
 -13   2   2    1.98    4.49
 -13   2   2    0.76    3.63
 -13   2   2   -0.42    4.08
  13  -2  -2    1.66    3.34
 -13   2   2   15.74    5.81
  12   2  -2  294.26   16.34
  12  -2  -2  250.11   18.33
 -12  -2   2  272.85   18.72
 -12   2   2  288.49   19.13
 -12  -2   2  273.86   18.23
 -12  -2   2  286.26   18.26
  12  -2  -2  289.15   17.06
 -12   2   2  255.69   18.64
 -12  -2   2  299.26   19.80
 -12   2   2  288.60   18.96
 -12  -2   2  259.24   18.16
 -12   2   2  277.23   19.52
 -11  -2   2  142.52   13.28
 -11  -2   2  169.23   13.09
  11  -2  -2  167.34   10.72
 -11  -2   2  127.62   11.73
 -11   2   2  159.46   12.19
 -11   2   2  152.14   13.06
 -11   2   2  139.94   13.21
 -11  -2   2  131.35   10.94
  11  -2  -2  119.11   11.94
  11   2  -2  135.35    9.56
 -11  -2   2  165.53    9.89
 -11  -2   2  131.62   12.28
 -11  -2   2  144.46   12.32
 -11   2   2  155.20   13.37
  11   2  -2  144.50    9.78
  10  -2  -2   14.57    4.48
  10  -2  -2   12.81    3.42
 -10  -2   2   14.22    4.19
 -10  -2   2   20.39    3.78
 -10   2   2   14.14    4.35
  10   2  -2   16.03    3.20
 -10   2   2   22.08    4.91
 -10  -2   2   10.93    4.31
 -10  -2   2   14.54    5.11
 -10   2   2   10.46    4.03
 -10  -2   2   15.79    4.57
 -10  -2   2   10.03    3.70
  10   2  -2    6.86    2.76
 -10  -2   2   16.15    4.37
 -10   2   2   13.21    4.57
  -9  -2   2    3.68    2.80
   9  -2  -2    5.50    3.41
  -9  -2   2    9.98    4.08
  -9  -2   2    7.46    3.13
  -9  -2   2    8.02    2.98
  -9  -2   2    5.47    2.34
  -9   2   2    8.29    3.10
  -9   2   2    8.38    3.56
   9   2  -2    7.16    2.30
  -9  -2   2    3.01    3.32
   9  -2  -2    1.99    2.21
   9   2  -2    4.87    2.06
  -9   2   2    1.94    2.53
   9   2  -2   -1.40    2.18
  -9   2   2    4.12    2.62
  -9  -2   2    0.92    2.36
   8  -2  -2   18.18    3.41
  -8   2   2   13.49    4.15
  -8  -2   2   17.97    3.95
   8   2  -2   18.36    3.05
  -8   2   2   20.86    4.43
  -8  -2   2   19.58    3.54
  -8  -2   2   18.91    3.18
   8  -2  -2   32.06    5.26
   8   2  -2   18.81    3.01
  -8  -2   2   18.03    4.40
  -8   2   2   17.34    4.29
  -8  -2   2   12.46    3.31
   8  -2  -2    9.60    3.98
  -8   2   2   19.98    4.03
   8   2  -2   21.47    3.53
   8  -2  -2   26.02    2.83
  -8  -2   2   25.11    4.44
  -8  -2   2   28.91    5.37
   7  -2  -2   43.36    5.69
   7  -2  -2   46.31    4.75
  -7   2   2   43.78    5.79
   7  -2  -2   43.75    5.66
   7   2  -2   51.27    4.88
  -7   2   2   42.89    5.75
  -7  -2   2   55.26    5.64
   7  -2  -2   49.91    3.73
  -7  -2   2   51.16    5.41
  -7  -2   2   48.46    6.41
  -7  -2   2   57.57    5.57
  -7   2   2   48.53    5.97
  -7   2   2   49.87    3.15
  -7  -2   2   52.00    6.40
  -7  -2   2   47.90    4.54
  -7  -2   2   59.97    4.85
  -7   2   2   46.67    5.28
   7  -2  -2   44.33    5.78
   7   2  -2   44.95    4.28
   7   2  -2   44.32    4.39
  -6  -2   2  174.39   10.33
   6  -2  -2  193.94   10.71
  -6  -2   2  188.50   10.09
  -6   2   2  183.85   11.40
  -6  -2   2  175.05   11.31
   6  -2  -2  182.67    9.27
   6  -2  -2  191.76   11.30
  -6  -2   2  172.71   10.44
   6  -2  -2  193.85   11.85
  -6  -2   2  188.20   10.82
  -6   2   2  179.06   11.20
  -6   2   2  183.67   11.21
   6   2  -2  176.45   10.39
   6   2  -2  175.59   10.13
  -6   2   2  171.20   10.66
   6  -2  -2  176.23   11.23
   6   2  -2  183.58   10.16
  -6   2   2  181.61    8.85
  -6   2   2  176.30   11.04
  -6  -2   2  177.95   11.70
  -5   2   2  623.37   26.75
   5  -2  -2  627.18   29.75
  -5   2   2  636.51   29.81
   5   2  -2  601.45   29.48
  -5  -2   2  599.36   29.77
  -5  -2   2  613.98   29.05
   5   2  -2  626.34   28.77
  -5  -2   2  610.99   29.08
  -5   2   2  605.21   30.37
  -5   2   2  625.52   29.21
   5   2  -2  599.41   29.30
   5  -2  -2  587.23   29.18
  -5  -2   2  616.99   28.41
   5  -2  -2  624.68   30.85
   5  -2  -2  634.50   27.55
  -5   2   2  598.16   27.25
  -5  -2   2  614.56   28.10
   5  -2  -2  609.17   28.62
   4  -2  -2    3.18    1.39
   4   2  -2    3.66    1.51
  -4   2   2    3.36    0.89
   4   2  -2    6.84    1.65
  -4   2   2    3.59    2.01
   4  -2  -2    3.85    1.73
   4  -2  -2    3.19    0.91
  -4   2   2    3.01    1.03
  -4   2   2    3.03    1.29
  -4   2   2    9.12    2.23
  -4  -2   2    3.36    1.36
   4   2  -2    3.33    1.58
   4  -2  -2    1.21    1.23
  -4  -2   2    4.70    1.82
  -4  -2   2    4.46    0.62
  -4   2   2    5.78    1.66
  -3  -2   2 3892.24  156.60
  -3   2   2 3793.47  165.22
  -3  -2   2 3880.22  164.75
   3   2  -2 3881.50  161.71
   3  -2  -2 3899.70  164.96
  -3   2   2 3597.53  162.43
   3  -2  -2 3709.21  161.93
  -3  -2   2 3836.11  162.32
  -3  -2   2 3853.50  169.66
   3   2  -2 3715.79  170.02
  -3   2   2 3706.23  164.88
   3  -2  -2 3719.90  161.97
   3   2  -2 3700.66  165.32
  -3   2   2 3801.52  164.94
  -3   2   2 3857.00  156.95
  -3   2   2 3713.80  170.65
   3   2  -2 3756.96  169.96
  -2  -2   2 9471.84  407.00
   2  -2  -2 9583.30  425.86
   2   2  -2 9222.97  414.79
   2  -2  -2 9733.73  404.96
   2  -2  -2 9011.91  407.02
  -2  -2   2 9998.93  413.20
   2   2  -2 9729.75  407.26
  -2   2   2 9260.10  407.63
  -2  -2   2 9737.84  405.04
   2   2  -2 9703.75  426.35
  -2   2   2 8932.37  426.56
   2   2  -2 9810.47  426.17
  -2  -2   2 9658.59  425.95
  -2   2   2 9663.60  413.18
   2  -2  -2 9835.43  414.98
  -1  -2   2   56.76    3.60
  -1   2   2   53.56    4.55
   1   2  -2   51.37    3.83
  -1  -2   2   59.90    4.34
   1  -2  -2   57.35    3.61
  -1   2   2   58.79    3.27
   1  -2  -2   61.72    4.14
  -1   2   2   57.72    3.89
   1  -2  -2   60.66    3.13
   1  -2  -2   64.79    4.28
   1  -2  -2   57.74    4.29
  -1  -2   2   63.06    4.34
   1   2  -2   56.96    3.98
  -1  -2   2   59.22    4.10
   0   2   2 8289.71  344.75
   0   2   2 7798.70  360.16
   0  -2  -2 8174.45  342.85
   0  -2  -2 8069.30  351.65
   0  -2   2 8171.63  342.36
   0  -2  -2 8305.48  345.76
   0   2  -2 7929.30  344.99
   0  -2   2 8197.64  350.11
   0   2  -2 8234.97  351.23
   0   2   2 7949.44  360.93
   0  -2  -2 7952.29  360.21
   0   2  -2 8417.44  361.38
   0  -2   2 7647.16  344.67
   1   2   2 1228.92   54.32
   1  -2   2 1316.66   56.02
   1  -2   2 1237.10   54.08
  -1  -2  -2 1254.64   56.09
   1   2   2 1247.05   56.29
   1  -2   2 1238.60   53.70
  -1   2  -2 1296.67   57.79
  -1  -2  -2 1289.12   54.52
  -1   2  -2 1252.95   55.33
  -1   2  -2 1180.44   54.10
   1   2   2 1199.33   56.71
  -1  -2  -2 1213.54   54.51
   1  -2   2 1222.45   57.14
  -2  -2  -2   21.74    2.80
   2  -2   2   19.37    3.08
   2   2   2   16.52    1.41
   2  -2   2   14.59    2.31
   2  -2   2   10.19    1.66
  -2   2  -2   17.59    1.57
  -2  -2  -2   14.33    1.90
  -2   2  -2   14.20    1.41
  -2   2  -2   16.48    1.81
   2  -2   2   16.69    1.90
  -2  -2  -2   16.96    2.66
  -2   2  -2   14.77    2.62
   2   2   2   15.76    1.62
  -2   2  -2   15.13    2.08
   2  -2   2   15.05    2.74
  -2   2  -2   16.64    2.73
  -3   2  -2  129.76    7.35
  -3  -2  -2  146.05    8.38
  -3   2  -2  138.11    8.64
   3  -2   2  132.80    7.87
  -3  -2  -2  135.68    8.25
   3  -2   2  128.35    6.62
  -3   2  -2  136.69    8.54
   3  -2   2  136.92    7.27
   3  -2   2  108.78    7.94
  -3  -2  -2  126.20    7.49
  -3   2  -2  124.09    6.37
   4  -2   2   15.33    2.55
  -4  -2  -2   17.07    3.10
  -4   2  -2   14.26    2.26
  -4   2  -2   12.18    3.12
  -4  -2  -2   15.55    2.82
  -4   2  -2   12.74    3.13
  -4  -2  -2   15.42    2.91
  -4   2  -2   18.00    3.64
  -4   2  -2   20.09    3.66
  -4  -2  -2   16.52    3.31
   4  -2   2   12.53    2.44
  -4  -2  -2   15.32    2.90
   4  -2   2   17.07    3.09
   5  -2   2  117.83    8.35
  -5   2  -2  112.72    8.95
  -5  -2  -2  128.14    8.74
  -5  -2  -2  129.23    8.64
  -5  -2  -2  132.95    8.29
   5  -2   2  118.10    7.77
  -5   2  -2  118.06    9.15
  -5  -2  -2  135.34    8.52
  -5  -2  -2  134.30    8.63
  -5  -2  -2  127.46    8.74
  -5   2  -2  118.97    7.43
  -5   2  -2  125.32    9.05
   5  -2   2  120.46    7.78
  -5   2  -2  130.75    9.27
  -6   2  -2  161.90   11.31
  -6  -2  -2  187.06   10.51
  -6   2  -2  153.76   11.03
  -6  -2  -2  167.59   10.71
  -6  -2  -2  142.30    9.56
   6  -2   2  156.24    9.86
   6  -2   2  150.94    9.49
  -6  -2  -2  145.46   10.02
  -6   2  -2  146.87   10.67
  -6  -2  -2  174.29   10.74
   6  -2   2  160.90   10.35
  -6  -2  -2  162.87   10.26
  -6  -2  -2  149.12   10.49
  -6   2  -2  146.02   10.85
  -6  -2  -2  156.36   10.57
  -6   2  -2  165.34    9.09
   7  -2   2  148.29    9.38
  -7   2  -2  142.58   11.22
  -7   2  -2  145.68   11.36
  -7  -2  -2  149.49   10.68
   7  -2   2  145.04    9.98
  -7  -2  -2  177.28   10.43
  -7  -2  -2  146.09   10.67
  -7  -2  -2  153.16   10.63
  -7   2  -2  146.88   11.14
  -7  -2  -2  149.10    9.59
   7  -2   2  171.19   10.69
  -7  -2  -2  141.41   10.53
  -7  -2  -2  142.35   10.68
  -7  -2  -2  155.57   10.53
  -7   2  -2  158.70    8.97
  -7   2  -2  156.75   11.55
   8  -2   2   -0.13    1.85
  -8  -2  -2    2.59    2.92
  -8   2  -2   -0.68    2.98
  -8  -2  -2   -0.55    1.91
  -8  -2  -2    7.53    3.42
  -8  -2  -2    4.95    3.05
   8  -2   2    0.02    2.38
  -8   2  -2    0.60    2.89
  -8   2  -2    3.25    2.89
  -8  -2  -2    0.52    2.38
  -8   2  -2    2.37    1.90
  -8  -2  -2    0.06    2.49
  -8   2  -2    5.02    3.17
  -8  -2  -2    2.28    2.98
  -8  -2  -2    3.32    2.71
  -9  -2  -2    7.09    3.66
   9  -2   2    6.49    2.66
  -9  -2  -2    7.58    3.98
  -9   2  -2    5.51    3.80
   9  -2   2    4.20    3.32
  -9  -2  -2   12.98    4.46
  -9   2  -2    6.55    4.09
  -9   2  -2    4.55    3.87
  -9  -2  -2    9.37    3.19
  -9  -2  -2    8.45    4.42
  -9  -2  -2   11.25    4.34
  -9  -2  -2    8.38    3.07
  -9   2  -2    9.30    4.27
  -9  -2  -2   10.63    4.22
  10  -2   2  342.82   20.96
 -10   2  -2  345.89   22.62
 -10  -2  -2  389.76   22.42
 -10  -2  -2  382.83   19.89
 -10   2  -2  359.73   23.23
 -10   2  -2  336.33   22.10
 -10  -2  -2  370.64   21.95
 -10   2  -2  345.99   22.58
 -10  -2  -2  333.18   21.21
 -10  -2  -2  364.78   20.22
 -10  -2  -2  395.51   22.55
  10  -2   2  382.79   20.05
 -10  -2  -2  378.35   21.72
 -10  -2  -2  370.13   22.35
 -11   2  -2  110.69   12.78
 -11   2  -2  105.43   12.26
  11  -2   2  124.99    9.26
 -11  -2  -2  128.85   12.18
 -11   2  -2  110.81   12.13
 -11  -2  -2  127.71   12.06
 -11  -2  -2  121.71   12.30
 -11  -2  -2  129.82   12.18
  11  -2   2  136.66   11.78
 -11  -2  -2  115.40    9.25
 -11  -2  -2  110.57   11.95
 -11  -2  -2  111.72   12.16
 -11  -2  -2  133.72    9.84
  12  -2   2    7.46    4.73
 -12  -2  -2    4.95    4.44
 -12   2  -2    6.14    4.47
 -12  -2  -2    3.90    4.77
 -12  -2  -2    7.74    5.17
  12  -2   2    4.51    3.07
 -12  -2  -2   13.63    5.60
 -12   2  -2    3.12    4.98
  12   2   2    7.89    1.97
 -12   2  -2    1.18    4.17
 -12  -2  -2    0.99    4.21
 -12  -2  -2    1.72    4.01
 -12   2  -2    8.07    4.95
 -13  -2  -2    3.73    4.63
 -13   2  -2    0.83    4.43
 -13  -2  -2    1.04    4.44
  13  -2   2    2.12    4.54
 -13  -2  -2    6.96    5.22
 -13   2  -2    1.88    4.23
 -13  -2  -2   -0.24    4.15
 -13   2  -2    3.20    4.74
 -13  -2  -2    3.74    4.83
  13   2   2   -0.72    1.86
 -13   2  -2   -3.24    3.74
 -13  -2  -2    7.90    5.48
  13  -2   2   -1.77    2.70
 -14  -2  -2   12.02    6.23
  14   2   2   25.00    3.57
 -14   2  -2   19.25    7.64
 -14  -2  -2   27.67    7.56
 -14  -2  -2   16.15    6.38
 -14  -2  -2   25.93    7.79
 -14   2  -2    8.72    5.54
 -14  -2  -2   16.76    6.70
  14  -2   2   16.64    4.41
 -14  -2  -2   16.26    6.69
 -14   2  -2   19.32    7.21
 -14   2  -2   31.76    8.52
 -15   2  -2    5.22    5.18
 -15  -2  -2    0.42    5.31
 -15  -2  -2   -2.41    5.56
 -15   2  -2    4.20    5.61
  15  -2   2    0.68    3.38
 -15   2  -2    0.81    5.96
 -15  -2  -2    4.54    6.51
 -15  -2  -2   -2.61    5.41
 -15  -2  -2   -1.01    4.89
  15   2   2    4.92    3.16
 -16  -2  -2    8.63    6.82
 -16   2  -2    2.14    6.22
 -16  -2  -2    4.12    6.76
 -16  -2  -2    4.38    6.10
 -16  -2  -2    1.76    5.90
 -16   2  -2    7.54    6.39
  16   2   2    7.37    3.83
 -16   2  -2    8.45    6.45
 -17   3   2    0.28    5.75
 -17   3   2   16.61    7.66
  17  -3  -2   15.54    7.25
 -17  -3   2    2.26    5.38
 -17  -3   2    8.08    6.74
 -17   3   2   11.12    6.74
 -17  -3   2    2.00    5.45
 -16   3   2   35.94    9.28
  16  -3  -2   25.38    8.63
 -16  -3   2   28.98    8.77
 -16  -3   2   36.42    8.84
 -16  -3   2   48.08   10.61
 -16   3   2   15.66    7.37
 -16  -3   2   25.60    8.49
 -16  -3   2   21.62    7.41
  16  -3  -2   31.24    7.35
  16   3  -2   29.68    6.31
 -16   3   2   25.95    8.40
  16  -3  -2   40.94    9.37
 -15   3   2   31.46    8.61
 -15  -3   2   38.35    8.98
 -15   3   2   43.58    9.17
  15   3  -2   40.86    6.41
  15  -3  -2   27.17    6.45
  15  -3  -2   24.58    7.81
 -15   3   2   35.32    8.65
 -15  -3   2   28.19    8.18
 -15   3   2   42.02    9.65
 -15  -3   2   23.67    7.88
 -15  -3   2   37.63    8.51
 -15  -3   2   25.77    7.27
  15  -3  -2   50.50    9.52
  14  -3  -2    1.76    4.54
 -14   3   2   -0.30    4.44
 -14   3   2    6.49    4.78
 -14  -3   2   -0.08    4.19
 -14  -3   2    2.97    4.01
  14   3  -2   -2.53    2.80
  14  -3  -2    4.84    5.17
 -14  -3   2    0.26    3.98
 -14  -3   2    4.03    4.28
  14  -3  -2   -7.07    2.83
 -14   3   2    0.20    3.95
 -14   3   2    5.40    4.55
 -14  -3   2   -2.20    4.35
 -13  -3   2    9.53    4.82
 -13  -3   2    4.27    4.64
  13  -3  -2   -0.17    3.70
 -13   3   2    7.57    4.57
 -13   3   2    1.62    4.68
 -13  -3   2    8.13    4.58
 -13  -3   2    8.01    5.30
  13  -3  -2    6.77    5.02
  13  -3  -2    6.58    3.73
 -13   3   2    8.12    5.48
 -13  -3   2    8.22    4.60
 -13   3   2    3.71    4.48
  13   3  -2    9.82    3.42
 -13  -3   2   18.25    5.58
 -12  -3   2    3.01    3.64
 -12  -3   2    0.15    3.66
  12  -3  -2   -1.80    2.93
 -12   3   2    1.62    4.18
 -12  -3   2    0.94    3.36
 -12  -3   2   -3.30    2.89
 -12  -3   2    1.62    3.08
  12  -3  -2    2.84    4.13
 -12   3   2   -0.79    3.10
  12  -3  -2    3.10    4.16
 -12   3   2   -3.73    3.44
 -12  -3   2   -2.76    4.10
 -12  -3   2    3.74    4.20
 -12   3   2    5.27    3.85
  12   3  -2    0.82    2.65
  12   3  -2    3.30    2.96
  11   3  -2   11.21    3.32
 -11   3   2    9.54    4.49
 -11   3   2    6.71    4.30
 -11  -3   2    4.85    3.74
  11   3  -2    1.56    3.03
 -11  -3   2    4.66    3.23
  11  -3  -2    4.32    3.25
 -11  -3   2    6.93    3.62
 -11  -3   2    2.38    3.94
  11  -3  -2   12.86    4.83
 -11  -3   2    3.17    3.45
 -11  -3   2   10.10    4.71
  11  -3  -2    4.32    4.03
 -11  -3   2    2.89    3.78
 -11   3   2    4.15    3.43
 -11   3   2   10.08    4.86
 -10   3   2   39.05    6.98
  10   3  -2   42.73    4.94
 -10  -3   2   42.27    6.54
 -10  -3   2   38.84    7.37
  10  -3  -2   36.18    6.61
 -10  -3   2   35.84    6.11
  10  -3  -2   41.74    6.95
 -10  -3   2   43.13    6.64
 -10   3   2   45.22    6.69
 -10   3   2   53.07    7.95
  10  -3  -2   36.63    5.43
 -10  -3   2   43.03    7.65
 -10  -3   2   38.90    5.25
 -10  -3   2   55.50    6.58
 -10   3   2   41.61    7.38
  10   3  -2   44.36    5.31
  -9  -3   2   94.86    7.44
   9   3  -2   78.03    6.65
  -9  -3   2   81.53    7.83
  -9   3   2   73.41    8.78
  -9   3   2   60.06    8.17
   9   3  -2   77.70    6.33
  -9  -3   2   81.93    7.78
  -9  -3   2   80.96    9.37
  -9  -3   2   66.53    7.60
  -9   3   2   98.75    9.59
  -9   3   2   70.65    7.75
  -9  -3   2   81.29    9.17
   9  -3  -2   90.27    8.94
  -9  -3   2   81.66    6.52
   9  -3  -2   76.66    8.22
   9  -3  -2   81.45    7.05
   8   3  -2    4.75    2.27
  -8   3   2    8.13    1.56
  -8  -3   2    7.74    3.39
   8  -3  -2    8.08    3.54
   8   3  -2    5.85    2.23
   8  -3  -2    4.56    3.08
   8  -3  -2    7.40    2.41
  -8  -3   2    3.14    2.15
  -8  -3   2    5.52    3.47
   8   3  -2    8.99    2.85
  -8   3   2    3.75    2.74
   8  -3  -2    3.13    2.40
  -8  -3   2   11.28    3.10
  -8   3   2   10.35    3.29
  -8  -3   2    9.55    2.68
  -8   3   2    5.40    3.14
  -8  -3   2    7.35    2.82
  -8  -3   2    9.16    3.09
  -8   3   2   13.96    4.01
  -7   3   2 1144.09   53.42
   7  -3  -2 1076.22   52.04
  -7  -3   2 1106.28   51.60
   7   3  -2 1140.74   52.79
   7   3  -2 1167.19   51.88
   7  -3  -2 1207.78   49.81
  -7  -3   2 1145.83   51.18
  -7   3   2 1150.40   52.25
  -7   3   2 1144.99   53.98
  -7  -3   2 1106.51   50.94
  -7   3   2 1110.42   47.95
  -7  -3   2 1171.87   50.44
   7  -3  -2 1135.20   53.29
  -7  -3   2 1035.33   52.67
   7   3  -2 1052.38   52.45
  -7  -3   2 1087.80   52.05
  -7  -3   2 1124.03   49.83
   7  -3  -2 1103.48   50.97
  -7   3   2 1071.20   52.43
  -7   3   2 1108.29   51.49
  -6   3   2   52.24    3.39
  -6   3   2   48.48    3.79
  -6   3   2   53.70    5.98
  -6  -3   2   46.38    4.84
   6  -3  -2   54.36    5.97
   6  -3  -2   46.40    5.53
  -6  -3   2   53.98    5.22
  -6   3   2   60.27    6.22
  -6   3   2   45.14    5.69
   6  -3  -2   53.49    5.22
   6   3  -2   53.66    4.97
   6   3  -2   46.17    4.79
   6   3  -2   48.19    4.67
  -6  -3   2   47.00    6.20
  -6   3   2   46.43    3.58
  -6  -3   2   55.20    4.97
  -6   3   2   38.86    5.52
  -6  -3   2   48.03    6.21
  -6  -3   2   59.31    5.24
   6  -3  -2   48.23    4.18
  -6   3   2   54.75    5.32
  -5  -3   2  145.55    8.38
  -5   3   2  133.57    9.22
  -5  -3   2  138.97    8.37
   5  -3  -2  129.87    8.87
  -5   3   2  134.69    7.51
  -5  -3   2  153.80    8.67
   5  -3  -2  130.26    8.76
  -5  -3   2  155.43    8.73
  -5   3   2  130.46    7.88
   5   3  -2  155.86    8.84
   5   3  -2  134.60    8.63
  -5  -3   2  136.43    9.72
   5   3  -2  137.12    8.70
  -5  -3   2  121.39    9.37
  -5   3   2  143.87    9.22
  -5   3   2  124.01    8.82
  -5   3   2  149.83   10.05
  -5   3   2  144.15    6.91
   5  -3  -2  146.98    9.48
  -5   3   2  147.09    8.79
   5  -3  -2  142.95    7.79
  -4  -3   2    0.38    0.55
  -4   3   2    5.30    1.96
  -4   3   2    2.53    1.07
  -4  -3   2   -0.02    1.55
   4  -3  -2    0.43    1.40
   4   3  -2    1.93    1.23
  -4  -3   2    0.89    1.74
  -4  -3   2    5.15    1.82
   4  -3  -2    2.07    0.91
  -4   3   2    4.35    1.89
   4   3  -2    1.18    1.50
   4  -3  -2    1.79    1.44
  -4  -3   2    1.55    1.34
   4   3  -2    1.43    1.50
  -4   3   2    2.52    1.37
  -4   3   2   -1.62    1.72
   4   3  -2    2.90    1.52
   4  -3  -2    3.41    1.92
   4  -3  -2    1.03    1.66
  -3  -3   2   21.55    2.84
   3  -3  -2   26.36    2.42
   3  -3  -2   22.49    3.03
  -3   3   2   22.15    2.44
   3   3  -2   22.28    3.05
  -3   3   2   31.08    3.28
  -3  -3   2   19.50    2.70
   3   3  -2   24.79    2.51
  -3  -3   2   21.42    2.19
  -3   3   2   29.80    2.94
   3   3  -2   28.21    3.58
  -3   3   2   26.46    4.18
  -3  -3   2   27.08    1.70
   3  -3  -2   24.87    3.50
  -3  -3   2   33.25    4.13
   3   3  -2   22.18    2.87
   3  -3  -2   28.95    2.78
  -3   3   2   26.62    3.15
  -2   3   2  213.89   11.28
  -2  -3   2  210.55   10.20
  -2  -3   2  217.07   11.31
  -2  -3   2  207.33   11.68
  -2  -3   2  228.25   12.03
  -2  -3   2  204.28   10.57
   2  -3  -2  214.44   11.84
   2  -3  -2  212.18   11.00
   2  -3  -2  218.42   11.67
   2   3  -2  213.54   10.84
   2   3  -2  228.08   11.46
   2  -3  -2  230.61   11.52
  -2   3   2  206.94   10.85
   2   3  -2  220.81   12.47
   2  -3  -2  215.25   10.61
  -2   3   2  229.64   10.99
   1  -3  -2  943.29   42.28
  -1  -3   2  937.22   42.41
   1  -3  -2  983.45   43.66
   1  -3  -2  980.05   42.08
  -1   3   2  961.11   43.10
  -1   3   2  987.97   46.16
   1  -3  -2  945.30   42.63
   1  -3  -2  968.35   43.94
   1   3  -2  979.77   43.88
   1   3  -2  903.46   42.94
  -1  -3   2 1009.55   43.39
  -1  -3   2 1026.30   43.92
  -1  -3   2  980.31   45.38
   1  -3  -2  979.69   45.02
  -1  -3   2  966.51   41.98
   0  -3   2  114.55    6.82
   0  -3   2  130.08    7.99
   0  -3  -2  135.96    6.94
   0  -3  -2  125.45    6.33
   0  -3  -2  135.31    7.45
   0  -3   2  129.75    7.48
   0   3   2  126.25    8.28
   0   3   2  131.86    7.50
   0  -3  -2  132.99    6.24
   0   3  -2  138.50    8.80
   0  -3  -2  132.28    7.76
   0   3   2  126.95    6.99
   0  -3  -2  115.66    7.78
   0  -3   2  130.71    7.76
   0   3  -2  128.91    7.42
   0   3  -2  130.34    7.37
   1   3   2  104.65    6.47
  -1   3  -2  105.77    6.62
   1  -3   2  120.43    7.53
   1   3   2  118.40    7.34
  -1   3  -2  122.31    8.21
  -1   3  -2  113.81    6.52
  -1  -3  -2  104.22    7.18
   1  -3   2  113.97    6.75
  -1  -3  -2  104.82    7.26
   1  -3   2  113.19    6.41
  -1   3  -2  120.13    6.75
  -1  -3  -2  118.88    5.55
  -1  -3  -2  121.39    5.41
   1   3   2  112.05    5.46
  -2   3  -2  129.82    8.16
   2  -3   2  136.45    7.44
   2  -3   2  124.54    8.08
  -2   3  -2  124.69    8.64
   2   3   2  128.69    7.61
   2  -3   2  126.87    7.06
   2   3   2  118.15    6.91
  -2   3  -2  119.21    6.97
  -2   3  -2  131.68    7.14
  -2  -3  -2  121.95    6.63
  -2   3  -2  135.24    7.27
  -2  -3  -2  118.81    8.09
   2  -3   2  135.23    8.40
  -2  -3  -2  129.26    8.12
  -3  -3  -2  129.89    8.77
  -3   3  -2  146.47    9.18
  -3  -3  -2  150.94    9.08
  -3  -3  -2  142.75    7.82
   3  -3   2  130.61    7.94
   3  -3   2  143.27    7.67
  -3   3  -2  136.89    7.53
   3   3   2  134.84    7.24
  -3   3  -2  134.16    9.00
  -3   3  -2  135.53    7.15
  -3   3  -2  130.22    8.98
  -3   3  -2  140.97    7.03
   3  -3   2  133.77    9.22
  -3   3  -2  150.98    9.46
   3  -3   2  143.16    8.90
  -3   3  -2  140.45    7.85
   3   3   2  130.42    7.65
  -3  -3  -2  149.66    9.27
  -3  -3  -2  156.45    8.98
  -4   3  -2   40.52    5.23
   4  -3   2   52.12    3.84
  -4   3  -2   45.47    3.34
  -4  -3  -2   41.17    4.78
  -4   3  -2   40.90    5.44
  -4   3  -2   53.93    5.30
  -4  -3  -2   51.64    4.53
  -4  -3  -2   37.78    4.06
   4  -3   2   48.76    5.49
  -4  -3  -2   42.77    5.17
   4   3   2   41.55    3.12
  -4   3  -2   48.56    3.90
   4  -3   2   50.49    4.87
  -4   3  -2   52.99    6.06
  -4   3  -2   44.04    5.48
   4   3   2   43.22    2.82
   4  -3   2   51.57    4.58
  -4  -3  -2   57.71    5.85
  -4  -3  -2   50.44    5.13
  -5   3  -2  268.97   11.69
  -5   3  -2  248.95   15.11
   5  -3   2  263.73   13.91
  -5   3  -2  244.93   14.98
  -5  -3  -2  262.36   14.18
  -5  -3  -2  261.95   14.17
   5  -3   2  253.66   14.36
  -5   3  -2  254.97   15.56
  -5  -3  -2  249.92   14.59
  -5  -3  -2  252.42   14.57
   5  -3   2  266.75   12.74
  -5  -3  -2  236.72   13.87
   5  -3   2  250.74   15.41
  -5   3  -2  258.81   13.26
  -5   3  -2  247.86   15.35
  -5  -3  -2  249.03   14.99
  -6  -3  -2  128.58    8.78
  -6  -3  -2  115.60    8.42
  -6   3  -2  108.26    9.30
  -6  -3  -2  128.58    8.63
   6  -3   2  123.53    8.51
  -6   3  -2  131.64    9.84
  -6  -3  -2  116.48    9.24
  -6  -3  -2  110.44    8.42
  -6  -3  -2  130.55    8.81
   6  -3   2  140.55    9.97
   6  -3   2  125.05    7.13
  -6  -3  -2  103.98    8.32
  -6   3  -2  127.48   10.01
  -6  -3  -2  118.38    9.28
   6  -3   2  120.31    8.41
   6  -3   2  127.06    8.36
  -6   3  -2  122.71    7.49
  -6   3  -2  118.88    9.64
  -7  -3  -2   94.02    7.87
  -7   3  -2   93.43    9.76
  -7   3  -2   82.40    9.14
  -7   3  -2   97.52    9.35
  -7   3  -2   91.85    6.25
   7  -3   2   97.68    7.51
  -7  -3  -2   80.52    8.56
  -7  -3  -2   93.06    8.27
   7  -3   2   92.95    7.56
  -7  -3  -2   95.57    8.25
  -7  -3  -2   98.83    7.86
  -7  -3  -2   91.96    8.75
  -7  -3  -2   99.68    7.81
  -7  -3  -2  104.34    7.78
  -7   3  -2   88.35    9.40
   7  -3   2  111.85    8.08
  -8  -3  -2  103.08    7.92
  -8  -3  -2  106.72    9.25
  -8  -3  -2   91.01    8.23
  -8  -3  -2  110.12    9.87
   8  -3   2  104.32    8.31
  -8   3  -2   88.20    9.77
  -8  -3  -2   73.17    8.34
  -8  -3  -2  109.19    9.27
  -8   3  -2   90.93   10.26
  -8   3  -2   92.38    9.68
   8  -3   2   92.25    8.50
  -8   3  -2   94.95   10.20
  -8  -3  -2   96.40    9.64
  -8  -3  -2  102.10    8.63
   8  -3   2  104.91    7.97
  -9  -3  -2  103.39   10.20
  -9  -3  -2   74.27    8.74
  -9   3  -2   70.05    9.38
   9  -3   2   77.40    8.30
  -9  -3  -2  101.97    9.51
  -9   3  -2   90.14    9.96
   9  -3   2   67.23    7.18
  -9  -3  -2   76.65    8.75
   9  -3   2  102.11    8.69
  -9  -3  -2   83.00    8.55
  -9   3  -2   86.01   10.15
  -9  -3  -2  115.80    8.51
  -9   3  -2   83.36   10.30
  -9  -3  -2   98.80    9.90
  -9  -3  -2   73.00    7.87
  10  -3   2   -0.02    2.40
 -10  -3  -2   -4.04    3.04
 -10  -3  -2    1.57    3.46
 -10   3  -2    1.39    4.12
 -10   3  -2   -2.70    2.83
 -10  -3  -2    0.66    2.82
  10  -3   2   -1.11    3.35
 -10  -3  -2    0.89    3.59
 -10  -3  -2   -1.11    3.86
 -10  -3  -2    0.84    3.93
 -10  -3  -2   -3.26    3.49
  10  -3   2   -0.85    3.23
 -10  -3  -2    1.91    3.38
 -10   3  -2    4.24    4.23
 -10   3  -2   -3.33    3.22
 -11   3  -2   60.23    9.61
 -11  -3  -2   73.21    9.81
 -11  -3  -2   91.01    8.59
 -11  -3  -2  106.30   11.38
 -11  -3  -2   75.90    8.11
 -11   3  -2   89.20   11.44
 -11   3  -2   78.77   11.16
 -11  -3  -2   96.83   10.65
 -11   3  -2   90.95   11.28
  11  -3   2   76.28    9.17
 -11  -3  -2   85.88   10.20
  11  -3   2   77.35    8.73
 -11  -3  -2   70.92    9.49
 -11  -3  -2   64.58    8.79
  11  -3   2   73.68    7.70
 -12  -3  -2    9.24    4.91
  12  -3   2   12.66    5.25
 -12  -3  -2    5.28    5.20
 -12   3  -2   19.90    6.91
 -12  -3  -2   10.87    5.46
 -12  -3  -2   18.14    6.10
 -12  -3  -2    6.31    3.84
 -12  -3  -2   11.22    5.29
  12  -3   2   17.59    5.67
 -12   3  -2   21.52    6.40
 -12   3  -2   16.34    6.35
 -12  -3  -2   13.07    4.47
 -12  -3  -2   19.39    6.66
 -12   3  -2   16.52    6.17
  12  -3   2    9.11    3.78
 -13  -3  -2    3.46    5.49
 -13   3  -2    5.46    5.10
  13  -3   2   16.18    5.81
 -13   3  -2   16.66    6.78
 -13  -3  -2    4.85    5.23
 -13  -3  -2   21.24    6.98
 -13  -3  -2    8.46    5.56
 -13   3  -2    6.84    5.12
 -13  -3  -2   11.64    6.00
 -13  -3  -2    0.04    4.53
 -13   3  -2    8.89    5.13
  13  -3   2    9.82    4.14
 -14  -3  -2    9.02    6.16
 -14   3  -2    8.94    6.29
 -14  -3  -2    4.31    5.62
  14  -3   2   -0.62    3.27
 -14  -3  -2    6.74    5.42
  14   3   2    3.62    2.59
 -14   3  -2   -1.80    4.41
 -14   3  -2   16.46    7.21
 -14  -3  -2    2.79    5.02
 -14  -3  -2   -1.47    4.29
 -14   3  -2    2.15    5.22
 -15  -3  -2   14.94    7.44
  15  -3   2   15.68    5.45
 -15   3  -2   16.66    7.44
 -15  -3  -2    6.43    6.06
 -15   3  -2   14.92    6.83
 -15  -3  -2   14.51    7.58
 -15  -3  -2   19.44    7.11
 -15   3  -2    7.73    6.26
 -15  -3  -2   20.59    7.65
  15   3   2   20.74    3.91
  16   4  -2    1.71    4.23
 -16  -4   2   10.28    6.72
 -16   4   2    6.69    5.57
 -16  -4   2   11.38    6.10
 -16   4   2   -1.43    4.58
 -16   4   2    7.16    6.26
  16  -4  -2   -0.47    5.77
 -16  -4   2   -4.14    4.50
 -16  -4   2    5.84    5.85
  16  -4  -2   -3.03    4.18
  16  -4  -2    1.36    5.83
 -15  -4   2    2.14    6.10
  15  -4  -2    4.18    5.44
 -15   4   2   -0.79    4.02
  15  -4  -2   -0.71    4.09
 -15   4   2   -2.40    4.62
 -15   4   2   -1.54    5.19
 -15  -4   2    3.86    5.75
  15  -4  -2    4.82    5.32
  15   4  -2    4.50    4.18
 -15   4   2    5.84    5.14
 -15  -4   2   -4.24    4.98
 -15  -4   2    3.10    5.41
 -15  -4   2   -3.41    5.47
  14  -4  -2    4.12    5.08
 -14   4   2    1.32    4.04
  14   4  -2    1.25    3.27
 -14  -4   2   -0.82    5.16
 -14  -4   2    2.32    4.14
 -14   4   2    5.57    5.52
 -14  -4   2   -0.16    4.82
 -14   4   2    4.29    4.63
 -14  -4   2   -1.95    3.78
  14  -4  -2    3.78    4.89
 -14   4   2    0.37    4.14
  14  -4  -2    1.37    3.48
 -14  -4   2    3.20    4.76
 -13  -4   2    2.91    4.24
 -13  -4   2    1.97    3.42
 -13   4   2    8.75    5.11
 -13  -4   2    0.52    3.64
  13   4  -2    4.41    3.15
 -13   4   2    4.53    4.42
 -13  -4   2   -2.75    4.15
 -13  -4   2    0.87    3.94
  13  -4  -2    0.56    4.49
  13  -4  -2    4.98    5.05
 -13   4   2   -1.17    3.41
  13  -4  -2    2.33    3.23
 -13   4   2    2.13    4.29
 -13  -4   2    3.43    4.85
 -12  -4   2    7.11    5.16
 -12   4   2   14.46    6.31
  12  -4  -2   12.83    4.58
 -12  -4   2   13.63    4.54
 -12   4   2   27.78    7.04
 -12  -4   2   19.49    5.72
  12   4  -2   20.49    4.70
 -12   4   2    6.19    4.26
 -12   4   2   19.35    5.95
  12   4  -2   15.98    4.32
  12  -4  -2   27.54    6.91
  12  -4  -2   21.82    6.27
 -12  -4   2   27.09    6.35
 -12  -4   2   12.10    5.91
 -12  -4   2   19.22    5.89
 -11   4   2   19.04    5.95
 -11  -4   2   28.05    5.97
  11  -4  -2   24.49    6.16
 -11  -4   2   26.68    7.12
 -11  -4   2   20.38    6.37
 -11   4   2   31.41    6.84
  11   4  -2   23.75    4.88
 -11  -4   2   18.75    5.28
  11  -4  -2   18.81    4.77
 -11  -4   2   37.38    5.69
 -11   4   2   27.69    6.12
 -11   4   2   34.60    7.38
  11  -4  -2   26.94    6.50
  11   4  -2   13.53    4.04
 -11  -4   2   22.60    5.53
 -10   4   2  228.36   16.12
 -10   4   2  201.10   14.71
 -10  -4   2  219.90   16.37
 -10   4   2  191.51   15.19
 -10   4   2  187.93   14.92
  10   4  -2  217.84   13.38
 -10  -4   2  201.45   14.03
  10  -4  -2  216.43   14.98
  10  -4  -2  205.19   15.07
  10  -4  -2  244.26   14.74
 -10  -4   2  204.81   14.01
 -10  -4   2  224.38   15.90
 -10  -4   2  210.56   14.60
 -10  -4   2  239.50   13.79
  10   4  -2  234.95   14.07
   9  -4  -2   36.38    5.57
   9   4  -2   41.23    5.10
  -9   4   2   43.50    7.32
  -9   4   2   39.61    6.05
  -9  -4   2   29.00    5.40
   9  -4  -2   31.66    6.06
  -9  -4   2   44.02    6.04
   9   4  -2   37.44    5.14
  -9   4   2   35.05    6.71
  -9  -4   2   40.91    7.20
  -9  -4   2   38.46    5.01
  -9   4   2   33.87    6.59
  -9  -4   2   41.61    5.39
   9  -4  -2   34.22    6.19
  -9  -4   2   45.27    6.23
  -9  -4   2   38.06    7.21
  -9   4   2   33.88    3.28
  -8  -4   2    7.25    2.65
  -8   4   2    0.98    2.74
  -8  -4   2    0.29    2.98
  -8  -4   2    1.54    2.43
  -8  -4   2    4.45    2.37
   8  -4  -2    2.92    2.51
  -8   4   2    5.88    3.84
  -8   4   2    5.92    3.18
   8  -4  -2    4.05    3.16
  -8   4   2    3.58    1.50
  -8  -4   2    3.20    2.43
   8   4  -2    6.62    2.68
  -8  -4   2    5.74    2.63
   8  -4  -2    1.96    3.14
   8  -4  -2    8.77    3.17
  -8   4   2    5.74    3.93
  -8  -4   2    3.13    3.48
   8   4  -2    4.71    2.33
   7  -4  -2    7.90    3.43
   7  -4  -2   14.06    2.97
  -7   4   2    9.66    3.53
   7   4  -2   11.91    3.31
  -7  -4   2   13.40    2.61
  -7   4   2    8.18    2.87
  -7  -4   2    4.28    3.27
  -7   4   2    8.05    1.91
  -7  -4   2   10.20    2.90
  -7  -4   2   10.68    3.79
   7   4  -2    8.97    2.86
   7  -4  -2    5.83    3.14
  -7   4   2   11.10    2.06
   7  -4  -2   13.71    3.36
  -7   4   2    9.46    3.36
  -7   4   2    5.95    3.23
  -7   4   2    4.74    3.58
   7   4  -2    2.64    1.94
  -7  -4   2    4.78    2.52
  -7  -4   2   10.29    2.86
  -7  -4   2    8.05    2.84
  -7   4   2    9.80    1.82
  -6   4   2   65.35    4.96
   6   4  -2   67.46    5.94
  -6  -4   2   57.32    7.01
  -6   4   2   70.04    7.08
  -6   4   2   48.98    5.61
  -6   4   2   54.76    4.51
   6   4  -2   55.90    5.73
   6  -4  -2   53.71    6.39
   6  -4  -2   51.90    6.49
  -6  -4   2   62.96    5.78
   6   4  -2   67.26    5.87
  -6   4   2   63.31    6.68
  -6  -4   2   61.66    5.60
  -6   4   2   60.03    3.30
  -6   4   2   71.43    6.99
   6  -4  -2   60.57    4.93
  -6  -4   2   73.93    7.69
  -6  -4   2   77.24    5.72
   6  -4  -2   65.43    6.21
  -6  -4   2   54.70    5.62
   6  -4  -2   53.42    6.22
  -5  -4   2  215.94   13.74
  -5   4   2  208.05   12.25
  -5  -4   2  212.06   11.60
  -5   4   2  215.99   12.45
   5  -4  -2  235.26   12.91
   5   4  -2  227.56   12.55
   5   4  -2  225.87   10.64
  -5   4   2  216.72   12.94
  -5  -4   2  224.15   12.08
  -5  -4   2  207.97   11.67
  -5   4   2  206.48   11.03
   5  -4  -2  189.13   12.31
   5   4  -2  219.04   12.50
  -5   4   2  199.11   13.64
  -5   4   2  228.97   12.76
  -5   4   2  214.05   10.28
   5  -4  -2  213.07   11.30
  -5  -4   2  189.58   12.86
  -5   4   2  206.56   11.67
   5  -4  -2  205.61   12.70
   5   4  -2  219.58   12.84
   5  -4  -2  198.09   12.99
  -5  -4   2  219.84   12.19
   4   4  -2  376.33   20.65
   4  -4  -2  388.61   18.49
  -4   4   2  360.73   21.40
  -4  -4   2  387.25   19.27
  -4   4   2  396.54   18.31
   4  -4  -2  375.89   19.59
  -4  -4   2  401.27   18.63
  -4  -4   2  396.61   20.14
   4  -4  -2  384.00   19.54
   4  -4  -2  381.59   18.16
   4   4  -2  397.12   19.82
  -4  -4   2  360.30   17.00
  -4   4   2  408.42   19.57
   4   4  -2  399.62   18.20
   4   4  -2  380.33   20.16
  -4  -4   2  404.28   19.34
  -4   4   2  398.77   19.90
  -4  -4   2  378.66   20.62
  -4  -4   2  400.62   18.85
  -4   4   2  355.84   19.07
   4  -4  -2  378.80   20.10
   3  -4  -2   45.36    5.02
  -3  -4   2   30.87    4.63
   3  -4  -2   42.15    4.42
   3   4  -2   37.93    3.54
  -3   4   2   31.74    3.29
  -3   4   2   31.31    5.00
  -3  -4   2   36.42    3.67
  -3   4   2   41.29    3.73
   3   4  -2   32.20    4.56
   3  -4  -2   34.82    4.37
   3  -4  -2   35.70    3.21
   3  -4  -2   27.84    3.19
  -3   4   2   33.12    3.80
  -3   4   2   50.06    4.42
   3   4  -2   30.34    3.65
  -3  -4   2   36.27    3.16
  -3  -4   2   35.34    3.76
  -3  -4   2   35.55    4.82
  -3  -4   2   33.25    3.99
   3   4  -2   42.44    4.58
   3  -4  -2   34.29    4.52
  -3  -4   2   36.03    2.43
  -2   4   2   19.33    3.90
   2  -4  -2   36.10    3.51
   2   4  -2   38.91    4.93
   2  -4  -2   25.44    3.69
  -2   4   2   42.89    4.20
  -2  -4   2   42.49    4.23
   2   4  -2   40.09    3.91
   2  -4  -2   32.78    4.38
  -2  -4   2   43.33    2.95
  -2   4   2   38.68    3.26
  -2  -4   2   30.81    3.54
   2  -4  -2   36.63    3.99
   2  -4  -2   36.91    4.47
   2   4  -2   44.95    3.93
  -2  -4   2   37.97    4.63
   2  -4  -2   41.38    3.41
  -2  -4   2   40.06    3.65
  -2   4   2   40.08    3.48
   1  -4  -2   17.31    2.14
   1   4  -2   16.57    2.66
   1  -4  -2   17.46    2.67
   1   4  -2   12.68    2.57
  -1  -4   2   13.37    2.43
   1  -4  -2   17.34    2.75
   1  -4  -2   17.64    3.29
  -1  -4   2   12.84    2.57
   1  -4  -2   11.86    2.91
   1  -4  -2   18.91    1.94
  -1  -4   2   14.31    2.94
   1   4  -2   14.73    2.60
  -1   4   2   20.48    3.11
   1   4  -2   13.77    3.27
  -1   4   2   21.54    3.91
  -1  -4   2   16.64    2.10
  -1  -4   2   22.06    3.20
   1  -4  -2   20.52    3.01
   0   4   2   55.01    4.11
   0  -4  -2   34.03    2.65
   0  -4  -2   47.40    4.88
   0  -4   2   41.37    4.37
   0   4  -2   37.27    3.71
   0  -4   2   41.49    4.29
   0  -4  -2   39.47    3.06
   0   4  -2   55.87    5.80
   0  -4   2   41.19    3.48
   0  -4  -2   50.39    4.46
   0  -4  -2   39.61    3.87
   0  -4  -2   41.15    2.85
   0  -4   2   46.41    4.47
   0   4   2   45.14    5.11
   0   4  -2   43.02    3.93
   0  -4  -2   41.57    2.52
   0  -4  -2   43.39    4.91
   0  -4   2   46.42    4.70
   0  -4  -2   45.31    3.81
   0   4  -2   39.97    4.10
   1   4   2  356.63   18.42
  -1   4  -2  380.49   20.49
  -1   4  -2  365.68   17.56
   1   4   2  364.82   19.54
  -1  -4  -2  374.68   18.75
   1  -4   2  368.33   18.93
  -1   4  -2  385.75   18.16
   1   4   2  352.54   16.61
   1  -4   2  361.94   18.15
   1  -4   2  336.59   19.17
   1  -4   2  388.23   18.42
  -1  -4  -2  376.62   16.50
  -1   4  -2  351.72   18.42
  -1   4  -2  343.00   17.98
  -1  -4  -2  350.36   18.11
  -1  -4  -2  354.01   16.47
   1   4   2  400.14   17.41
   1  -4   2  380.43   17.59
  -1  -4  -2  391.46   19.32
  -1  -4  -2  362.59   18.78
  -2   4  -2    1.25    1.51
  -2   4  -2    6.71    2.50
   2  -4   2    3.53    1.62
  -2  -4  -2    5.31    2.21
   2  -4   2    1.53    1.53
   2  -4   2    3.91    1.95
   2  -4   2    3.13    2.19
  -2  -4  -2    4.56    2.23
  -2   4  -2    0.38    1.64
  -2   4  -2    4.99    1.56
   2   4   2    2.28    1.46
  -2  -4  -2    2.24    1.05
  -2  -4  -2   -0.25    1.68
  -2   4  -2    4.25    2.24
  -2   4  -2    6.81    2.75
  -2  -4  -2    1.77    1.55
   2   4   2    0.52    1.57
  -2   4  -2    4.68    1.59
   3   4   2  184.35   10.96
  -3  -4  -2  184.64    9.78
  -3   4  -2  195.49   11.59
   3  -4   2  185.16   10.76
  -3   4  -2  185.89   10.02
   3  -4   2  194.30   11.70
  -3  -4  -2  190.37   11.64
  -3  -4  -2  190.71   11.45
  -3   4  -2  186.80   10.19
   3  -4   2  194.96   11.97
  -3   4  -2  187.64   10.16
  -3   4  -2  198.30   11.69
  -3   4  -2  187.15   12.32
  -3   4  -2  191.91   11.72
  -3  -4  -2  188.43   11.93
  -3  -4  -2  177.67   11.00
   3   4   2  188.55   10.19
  -4   4  -2    7.20    1.71
  -4  -4  -2    6.51    2.59
   4  -4   2    7.82    2.38
   4  -4   2    5.65    2.50
  -4  -4  -2    6.98    3.06
   4   4   2    7.31    2.15
  -4  -4  -2    6.13    1.95
  -4   4  -2    6.65    3.04
  -4   4  -2   12.07    2.14
  -4   4  -2    2.54    2.40
  -4  -4  -2    4.23    2.82
   4  -4   2    2.99    2.32
  -4   4  -2    5.49    1.52
  -4   4  -2    8.72    3.15
   4   4   2    7.42    1.70
  -4  -4  -2    5.07    2.35
  -4   4  -2    6.50    3.08
   4  -4   2    6.17    2.40
  -4   4  -2    6.18    1.75
  -5  -4  -2  158.74   10.08
   5  -4   2  149.71    9.46
  -5   4  -2  145.42   10.65
   5  -4   2  153.27   10.31
  -5  -4  -2  155.75   10.69
   5   4   2  152.36    8.82
  -5   4  -2  157.02   10.96
  -5   4  -2  145.41   10.73
   5   4   2  156.70    8.19
  -5   4  -2  140.50   10.58
  -5  -4  -2  165.48    9.55
  -5  -4  -2  151.33    9.14
  -5  -4  -2  148.86   10.15
   5  -4   2  127.33    9.32
   5  -4   2  145.77    8.76
  -5   4  -2  153.74    8.80
  -5   4  -2  155.63    8.40
   6  -4   2  160.19   10.32
   6  -4   2  143.60   10.38
  -6   4  -2  147.58   11.51
  -6  -4  -2  151.58   11.35
   6  -4   2  183.35    9.68
  -6   4  -2  167.41    8.40
   6  -4   2  159.38   10.94
   6   4   2  161.84    9.02
  -6   4  -2  167.49   11.94
  -6  -4  -2  149.37   10.06
  -6   4  -2  155.30   11.59
  -6   4  -2  182.65   12.51
   6   4   2  170.43    8.54
  -6  -4  -2  146.40   11.47
  -6  -4  -2  167.12   10.32
  -6  -4  -2  168.43   10.80
  -6   4  -2  153.84    9.27
  -6  -4  -2  179.05   11.33
  -6  -4  -2  168.14   10.36
  -6  -4  -2  155.89   10.37
  -7  -4  -2   30.76    6.03
  -7  -4  -2   42.09    5.40
  -7   4  -2   32.07    3.72
  -7  -4  -2   34.46    5.10
  -7   4  -2   28.96    5.95
  -7   4  -2   35.51    6.25
  -7  -4  -2   34.45    4.86
  -7   4  -2   31.56    6.07
  -7  -4  -2   27.97    5.08
   7  -4   2   41.91    5.40
  -7  -4  -2   37.83    5.42
  -7  -4  -2   35.21    6.24
   7  -4   2   30.90    5.13
  -7   4  -2   27.75    5.93
   7  -4   2   31.76    5.11
  -7  -4  -2   36.73    5.18
   7   4   2   32.74    3.09
   7   4   2   34.23    2.70
  -8  -4  -2   85.52    8.27
   8  -4   2   92.82    8.06
   8  -4   2  100.11    8.82
  -8  -4  -2   71.33    8.97
  -8   4  -2   79.66    9.61
   8  -4   2   87.52    8.06
  -8   4  -2   77.51    9.35
  -8  -4  -2   87.99    8.42
  -8  -4  -2   94.00    9.78
  -8   4  -2   71.41    9.52
  -8   4  -2   86.76    9.99
  -8  -4  -2   82.04    8.29
  -8  -4  -2   91.71    8.51
  -8  -4  -2   90.67    8.45
  -8  -4  -2  108.16    8.33
  -9  -4  -2   26.42    5.35
  -9  -4  -2   37.92    7.18
  -9  -4  -2   24.39    6.59
  -9   4  -2   29.88    6.80
  -9  -4  -2   41.58    6.08
   9  -4   2   31.62    5.74
   9  -4   2   37.51    6.17
  -9  -4  -2   41.83    6.52
  -9   4  -2   36.61    7.56
  -9  -4  -2   29.64    6.09
  -9  -4  -2   28.52    5.94
   9  -4   2   32.62    5.49
  -9   4  -2   40.85    7.52
  -9  -4  -2   39.07    6.06
  -9   4  -2   34.72    7.10
 -10  -4  -2    7.28    3.85
 -10  -4  -2    7.54    4.95
 -10  -4  -2    4.97    3.88
 -10  -4  -2    3.21    3.90
 -10  -4  -2    3.87    4.27
  10  -4   2    7.56    4.27
  10  -4   2    2.72    3.41
 -10   4  -2   12.58    5.03
 -10  -4  -2    0.20    3.40
 -10   4  -2    3.29    4.37
  10  -4   2    4.56    3.79
 -10  -4  -2    4.02    4.12
 -10   4  -2    0.45    4.28
 -10   4  -2   13.86    5.09
 -10  -4  -2    3.88    3.61
 -11  -4  -2   32.20    7.02
 -11  -4  -2   15.47    5.47
 -11  -4  -2   20.84    5.41
 -11   4  -2   15.72    6.39
  11  -4   2   13.18    4.47
 -11   4  -2   16.95    6.00
 -11  -4  -2   12.69    5.34
  11  -4   2   27.68    6.03
 -11   4  -2   16.62    5.90
 -11  -4  -2   25.04    6.70
 -11  -4  -2   18.87    6.07
 -11  -4  -2   22.19    5.36
 -11   4  -2   16.88    6.48
  11  -4   2   23.76    6.22
 -12  -4  -2    0.03    3.12
 -12  -4  -2   -4.38    3.62
  12  -4   2    0.45    3.29
 -12  -4  -2    4.28    4.82
 -12  -4  -2    6.88    5.09
 -12  -4  -2    6.30    4.05
 -12   4  -2    2.78    4.51
  12  -4   2    5.39    4.48
 -12   4  -2   -1.73    3.87
 -12   4  -2    2.83    4.75
 -12  -4  -2    3.95    4.80
 -12   4  -2    1.21    3.92
 -12  -4  -2    0.33    4.09
  13   4   2   -0.61    2.10
 -13   4  -2   -1.15    4.25
  13  -4   2   -2.64    3.04
 -13  -4  -2    0.24    4.39
 -13  -4  -2    2.69    4.86
 -13  -4  -2    4.54    4.91
 -13  -4  -2    0.02    5.28
 -13   4  -2   -1.86    4.73
 -13   4  -2   -0.49    4.21
 -13   4  -2    2.18    4.73
 -13  -4  -2    2.78    4.96
  14   4   2   25.40    3.98
 -14   4  -2   17.85    7.70
 -14   4  -2   26.55    7.94
 -14   4  -2   36.41    8.97
 -14  -4  -2   26.70    7.52
 -14   4  -2   22.11    7.49
 -14  -4  -2   22.48    7.93
 -14  -4  -2   19.86    7.75
 -14  -4  -2   25.91    8.08
  14  -4   2   26.16    6.25
 -14  -4  -2   26.41    7.85
  15   4   2    1.39    3.21
 -15  -4  -2   -1.11    5.70
 -15  -4  -2   10.20    7.59
 -15   4  -2    1.57    5.31
 -15  -4  -2    5.95    7.10
 -15   4  -2    0.65    4.63
 -15   4  -2    8.23    6.43
 -15  -4  -2    8.39    6.73
 -15  -4  -2    5.15    6.16
 -16   5   2    6.61    6.45
 -16  -5   2    1.86    5.53
  16  -5  -2    3.19    5.97
 -16  -5   2    1.92    6.69
 -16   5   2    5.73    5.90
 -16  -5   2    9.93    6.15
 -16  -5   2   10.34    6.70
 -16   5   2    6.46    5.78
  16  -5  -2    0.05    5.67
 -15  -5   2    4.72    5.95
 -15   5   2   26.16    8.91
 -15  -5   2    9.79    6.49
 -15  -5   2   17.97    7.58
  15  -5  -2   12.54    5.79
 -15   5   2    7.25    5.76
  15  -5  -2   10.60    6.26
 -15   5   2   28.40    8.47
 -15   5   2    7.00    5.56
  15  -5  -2    9.43    6.25
  15   5  -2   13.91    5.59
 -15  -5   2   15.89    7.03
 -15  -5   2    9.62    6.14
 -14  -5   2   10.74    5.93
  14  -5  -2    3.55    5.16
 -14  -5   2   -1.03    4.80
 -14   5   2    3.50    4.75
 -14   5   2    8.16    5.81
 -14  -5   2   10.13    5.86
 -14   5   2   13.02    6.29
 -14  -5   2    8.16    6.24
  14  -5  -2   10.65    5.57
  14  -5  -2    6.42    4.67
 -14  -5   2   12.31    5.99
  14   5  -2    2.88    4.19
 -14   5   2   -1.42    4.89
 -13  -5   2    9.84    4.96
  13   5  -2    4.26    3.76
 -13  -5   2   -0.54    3.66
 -13   5   2    5.23    5.06
 -13  -5   2    9.25    5.27
 -13  -5   2   11.36    6.07
 -13   5   2    8.20    4.63
  13  -5  -2    8.15    5.07
 -13   5   2   10.25    6.16
 -13   5   2    4.86    5.55
  13  -5  -2   10.33    5.54
  13   5  -2   14.03    4.83
  13  -5  -2    5.84    4.03
 -13  -5   2    5.99    4.83
 -13  -5   2   16.33    6.19
 -12  -5   2   73.93    9.48
 -12   5   2   70.26   10.33
  12   5  -2   78.29    8.08
  12  -5  -2   50.91    8.88
 -12  -5   2   60.66    8.73
 -12  -5   2   69.08    9.13
 -12  -5   2   58.11   10.04
 -12   5   2   59.03    9.81
 -12  -5   2   71.30   11.08
 -12   5   2   60.59    9.35
  12  -5  -2   89.22   10.85
  12  -5  -2   67.53    8.57
  12   5  -2   76.36    8.16
 -12   5   2   69.00   10.79
 -11  -5   2   -0.05    3.49
 -11   5   2    2.36    4.44
  11  -5  -2    2.18    3.39
  11  -5  -2    1.73    3.89
 -11   5   2    6.16    4.46
 -11  -5   2    1.75    3.23
 -11  -5   2   -3.58    3.16
 -11  -5   2   -0.42    3.88
 -11  -5   2    2.57    3.58
  11   5  -2   10.91    3.91
 -11   5   2    2.48    4.51
 -11  -5   2   -2.88    4.25
  11   5  -2    3.85    3.18
 -11   5   2    0.59    3.43
  11  -5  -2    8.43    4.38
  10  -5  -2   17.35    5.41
 -10   5   2    4.74    3.89
 -10  -5   2    2.86    4.47
 -10  -5   2    2.30    3.29
 -10  -5   2    4.50    3.38
 -10  -5   2   -2.81    3.21
 -10  -5   2    8.03    3.87
 -10   5   2   13.18    4.93
 -10   5   2    4.78    3.73
 -10   5   2    3.87    1.75
 -10   5   2    2.00    3.94
  10   5  -2    2.01    2.84
  10  -5  -2    3.74    3.51
  10   5  -2   -1.17    2.64
 -10  -5   2    2.74    2.98
  10  -5  -2   11.01    4.68
  -9  -5   2  134.52   12.74
   9   5  -2  112.27    9.55
   9  -5  -2  131.43   10.34
   9   5  -2  118.91    9.66
  -9  -5   2  106.99   10.02
  -9  -5   2  122.85    9.57
  -9   5   2  134.37    7.87
  -9  -5   2  111.67    9.37
  -9   5   2  133.87   10.68
  -9   5   2  138.34   11.99
   9  -5  -2  122.34   11.53
  -9   5   2  133.33   12.25
  -9  -5   2  123.64   12.18
   9  -5  -2  142.16   11.74
  -9  -5   2  129.24    9.79
  -9   5   2  143.95   12.47
  -8  -5   2  428.59   22.11
  -8  -5   2  413.53   21.53
  -8   5   2  412.80   19.59
  -8   5   2  394.00   22.64
  -8  -5   2  385.00   23.77
  -8   5   2  394.59   18.76
  -8  -5   2  398.08   23.32
  -8   5   2  405.79   22.79
   8   5  -2  385.06   22.18
  -8   5   2  430.71   23.49
   8  -5  -2  412.85   20.44
  -8   5   2  395.19   23.38
  -8  -5   2  380.27   21.27
   8  -5  -2  409.53   22.56
   8   5  -2  396.38   22.01
   8  -5  -2  424.97   23.52
   8  -5  -2  408.58   22.85
  -8  -5   2  406.84   21.19
  -7   5   2    0.74    1.18
   7  -5  -2   -3.40    2.01
  -7  -5   2    2.74    2.13
  -7  -5   2    3.06    3.04
  -7   5   2    4.68    2.20
  -7   5   2    2.32    2.82
   7  -5  -2   -0.03    2.71
  -7  -5   2    4.77    2.63
   7   5  -2    2.95    2.27
  -7   5   2    0.30    2.25
   7  -5  -2    6.65    3.41
  -7   5   2    1.24    2.85
   7   5  -2    2.26    2.71
  -7  -5   2    4.91    2.47
   7  -5  -2    3.82    2.76
  -7   5   2    1.60    2.83
  -7  -5   2   -0.44    2.94
   7  -5  -2   -0.16    2.88
  -7  -5   2   -0.09    1.98
   6   5  -2   37.86    5.51
   6  -5  -2   48.48    6.25
   6  -5  -2   32.46    5.66
  -6   5   2   37.05    5.04
  -6   5   2   39.92    5.79
  -6  -5   2   44.38    4.92
   6   5  -2   35.46    4.96
  -6   5   2   46.09    6.12
  -6   5   2   38.52    5.80
   6  -5  -2   40.95    5.51
  -6  -5   2   46.66    6.75
   6  -5  -2   33.41    5.56
  -6  -5   2   31.53    4.77
  -6   5   2   26.09    4.08
  -6   5   2   55.26    7.32
  -6  -5   2   38.21    4.58
   6  -5  -2   48.42    4.73
  -6   5   2   34.67    3.99
  -6  -5   2   45.51    4.81
  -6   5   2   40.33    2.89
  -6  -5   2   25.01    5.69
  -5  -5   2  273.81   17.18
  -5   5   2  293.12   15.55
   5   5  -2  294.64   16.55
  -5   5   2  274.52   15.76
  -5  -5   2  267.44   14.85
   5   5  -2  299.98   16.23
  -5   5   2  276.34   16.28
   5   5  -2  298.94   14.47
  -5  -5   2  272.03   16.66
  -5   5   2  287.93   14.67
   5  -5  -2  284.58   16.87
  -5  -5   2  296.16   15.46
   5   5  -2  298.81   17.25
  -5   5   2  294.02   15.96
   5  -5  -2  287.68   14.80
  -5   5   2  285.51   18.16
  -5   5   2  303.04   14.04
   5  -5  -2  289.08   16.52
   5  -5  -2  293.14   16.47
  -5   5   2  281.19   16.03
  -5  -5   2  281.76   14.86
  -5  -5   2  251.37   15.38
  -4  -5   2   43.71    5.31
   4   5  -2   44.11    5.46
   4  -5  -2   52.20    6.04
  -4   5   2   54.12    5.08
  -4   5   2   50.98    6.91
  -4   5   2   46.78    5.37
  -4  -5   2   46.11    3.47
  -4  -5   2   54.98    4.88
   4  -5  -2   44.57    5.63
  -4  -5   2   59.18    4.84
  -4   5   2   61.48    5.60
  -4  -5   2   50.14    6.42
   4   5  -2   55.48    5.54
   4  -5  -2   44.19    5.27
   4   5  -2   48.31    6.01
  -4   5   2   51.16    3.94
   4  -5  -2   63.54    6.63
  -4   5   2   47.94    4.47
   4   5  -2   45.38    4.49
   4  -5  -2   56.85    4.76
  -4  -5   2   50.28    4.70
  -4  -5   2   42.48    6.14
   3   5  -2   88.27    7.96
  -3   5   2   80.00    6.43
   3  -5  -2   78.86    5.61
   3  -5  -2   70.92    7.12
  -3   5   2   77.20    5.64
  -3  -5   2   81.64    5.86
  -3  -5   2   78.36    5.68
   3  -5  -2   85.67    7.41
   3   5  -2   69.53    5.62
  -3  -5   2   89.06    7.81
   3   5  -2   82.67    6.35
  -3  -5   2   70.33    7.24
  -3  -5   2   84.19    4.35
  -3   5   2   77.69    5.85
  -3  -5   2   88.88    6.41
  -3   5   2   77.75    8.17
  -3  -5   2   76.33    6.27
   3  -5  -2   82.83    5.68
   3  -5  -2   82.44    6.68
  -3  -5   2   81.78    5.77
  -3  -5   2   69.82    5.13
   3  -5  -2   84.59    6.75
  -3  -5   2   82.86    4.46
   2  -5  -2  234.56   12.83
  -2  -5   2  193.20   12.45
   2  -5  -2  205.48   11.05
  -2  -5   2  209.88   10.55
   2  -5  -2  224.56   12.36
   2  -5  -2  192.69   12.80
   2   5  -2  235.27   12.18
  -2   5   2  210.12   11.35
  -2  -5   2  212.79   11.65
  -2   5   2  214.05   12.25
  -2  -5   2  209.30   12.57
   2  -5  -2  214.15   11.37
   2   5  -2  221.25   12.22
   2  -5  -2  197.60   12.60
  -2  -5   2  203.86   11.40
   2  -5  -2  235.54   11.99
   2   5  -2  216.84   14.02
  -2   5   2  232.96   11.51
  -2  -5   2  193.29   12.71
  -2  -5   2  213.62   11.86
  -2  -5   2  225.55   11.64
  -1  -5   2    5.63    2.38
  -1  -5   2    3.75    2.00
  -1   5   2    0.19    2.41
  -1  -5   2    1.91    1.61
  -1  -5   2   -0.80    1.66
  -1   5   2    2.95    1.34
   1  -5  -2    0.89    1.61
   1   5  -2    2.87    1.57
   1  -5  -2    4.91    1.68
  -1  -5   2    1.15    1.83
   1  -5  -2    0.44    2.07
  -1  -5   2    1.18    1.52
   1   5  -2    0.68    1.64
  -1   5   2    2.24    2.13
   1  -5  -2   -1.15    1.47
  -1  -5   2    6.47    2.67
   1   5  -2    0.89    1.57
   1   5  -2    3.57    2.28
  -1  -5   2    2.86    2.05
   1  -5  -2    0.42    1.82
   1  -5  -2    1.02    1.68
   1   5  -2    0.95    2.14
   1  -5  -2    1.78    1.70
   1  -5  -2    0.68    1.18
   0  -5  -2 1109.55   49.97
   0   5  -2 1124.27   49.94
   0  -5  -2 1134.21   52.38
   0  -5   2 1196.26   52.22
   0  -5  -2 1208.49   49.82
   0  -5   2 1116.44   51.71
   0  -5  -2 1083.34   50.35
   0   5  -2 1134.79   51.49
   0  -5   2 1128.19   50.33
   0  -5  -2 1165.14   49.48
   0   5   2 1113.09   54.93
   0   5   2 1130.73   51.14
   0  -5  -2 1148.20   49.50
   0  -5   2 1156.00   50.96
   0   5  -2 1174.39   52.02
   0  -5   2 1146.38   50.64
   0  -5  -2 1096.11   52.34
   0  -5   2 1144.97   50.26
   0  -5  -2 1098.28   51.02
   0   5  -2 1142.84   49.77
   0  -5   2 1126.94   50.37
   0   5  -2 1043.04   55.26
   0  -5   2 1145.93   54.11
   0  -5  -2 1152.93   53.20
  -1  -5  -2   86.66    7.70
  -1   5  -2   97.96    6.17
  -1  -5  -2   75.16    6.35
   1  -5   2   76.61    5.60
   1  -5   2   86.08    6.78
  -1  -5  -2   67.44    7.22
  -1   5  -2   93.74    6.16
  -1  -5  -2   84.38    6.04
   1  -5   2   88.79    6.80
   1   5   2   88.03    7.60
  -1  -5  -2   88.31    5.36
  -1   5  -2   89.96    6.50
   1   5   2   87.87    6.56
  -1   5  -2   83.63    6.47
   1  -5   2   76.37    6.58
   1  -5   2   92.15    6.76
  -1   5  -2   81.41    6.04
   1  -5   2   82.58    6.58
   1  -5   2   79.50    7.04
   1   5   2   87.95    6.05
  -1  -5  -2   87.12    4.62
   1  -5   2   76.42    6.80
  -1   5  -2   93.37    8.69
   2  -5   2   20.08    3.69
   2  -5   2   21.42    3.83
  -2  -5  -2   24.26    4.02
  -2   5  -2   19.24    4.63
   2   5   2   22.56    3.33
   2   5   2   20.55    3.88
  -2  -5  -2   18.52    2.02
  -2   5  -2   16.70    2.92
   2  -5   2   17.36    2.84
  -2  -5  -2   16.13    3.76
   2  -5   2   21.45    3.98
   2   5   2   22.26    2.94
  -2   5  -2   17.81    3.19
   2  -5   2    7.33    2.89
  -2   5  -2   14.24    3.31
   2  -5   2   19.20    3.79
  -2   5  -2   27.63    3.29
   2  -5   2   20.32    3.90
  -2  -5  -2   23.25    3.97
   2  -5   2   15.58    3.63
  -2   5  -2   17.46    2.75
  -2  -5  -2   16.06    3.73
   3  -5   2   -1.64    1.71
   3  -5   2   -1.62    1.81
  -3   5  -2    1.24    1.89
  -3   5  -2   -1.35    2.65
  -3  -5  -2   -0.60    1.73
   3  -5   2    0.10    2.01
   3  -5   2    2.93    2.40
   3  -5   2    5.02    2.77
  -3   5  -2    2.69    1.49
  -3  -5  -2    2.73    2.25
   3   5   2    0.73    1.67
  -3   5  -2    3.96    2.38
  -3   5  -2    2.64    2.27
   3   5   2    1.19    2.03
  -3  -5  -2    0.63    2.45
   3  -5   2    3.16    2.37
  -3   5  -2   -0.72    2.01
  -3  -5  -2    2.91    2.54
  -3   5  -2   -0.67    1.01
  -3  -5  -2    0.76    1.16
  -4  -5  -2   56.59    6.27
  -4  -5  -2   64.90    6.71
  -4   5  -2   52.89    7.08
   4   5   2   52.71    4.77
   4  -5   2   64.62    6.08
  -4   5  -2   57.03    4.58
   4  -5   2   60.39    6.02
  -4   5  -2   56.60    6.62
  -4   5  -2   62.12    5.06
  -4   5  -2   48.28    4.78
   4  -5   2   44.06    5.72
   4  -5   2   47.49    6.25
  -4   5  -2   52.51    6.27
   4   5   2   59.35    5.77
  -4  -5  -2   38.04    6.14
  -4  -5  -2   68.03    7.42
   4  -5   2   47.69    4.78
  -4  -5  -2   51.00    4.54
   4  -5   2   53.61    6.17
  -4   5  -2   59.20    6.89
   5  -5   2   21.17    4.03
  -5   5  -2   17.05    2.48
   5  -5   2   17.34    3.21
  -5   5  -2   23.21    4.80
  -5   5  -2   16.23    4.41
  -5  -5  -2   19.27    4.02
  -5   5  -2   16.85    2.87
  -5  -5  -2   19.92    4.92
  -5   5  -2   18.08    2.82
  -5  -5  -2   19.76    2.88
   5  -5   2   21.92    4.49
   5   5   2   13.06    2.62
  -5  -5  -2   16.75    4.52
   5  -5   2   19.85    4.10
  -5  -5  -2   15.16    3.82
  -5  -5  -2   14.05    3.04
   5  -5   2   15.41    4.35
   5   5   2   15.49    3.29
  -5   5  -2   20.92    4.82
  -6  -5  -2   18.38    4.80
   6  -5   2   13.35    4.65
   6   5   2   23.14    3.13
  -6  -5  -2   23.95    3.59
  -6  -5  -2   24.31    4.03
  -6  -5  -2   20.48    3.95
  -6   5  -2   26.27    5.52
  -6   5  -2   25.74    5.37
  -6   5  -2   20.24    3.05
  -6  -5  -2   22.90    4.73
   6  -5   2   25.58    4.72
  -6   5  -2   24.02    3.22
   6   5   2   19.05    3.52
  -6  -5  -2   18.30    4.21
  -6  -5  -2   13.39    3.45
   6  -5   2   18.10    4.13
  -6   5  -2   20.76    4.99
   6  -5   2   20.68    4.42
  -6  -5  -2   25.62    5.57
   6  -5   2   18.14    3.48
  -7  -5  -2  104.23    8.28
  -7   5  -2  107.27   10.69
   7   5   2  113.41    6.94
  -7  -5  -2  105.11    8.32
   7  -5   2  102.26    8.87
  -7  -5  -2  110.88    9.03
  -7  -5  -2  120.72   11.21
  -7   5  -2   94.35   10.29
   7  -5   2  106.13    8.99
   7  -5   2   93.95    8.78
  -7  -5  -2   94.09    8.34
  -7   5  -2   95.83    6.16
  -7   5  -2   92.49   10.00
  -7  -5  -2   95.59    9.13
   7   5   2  107.59    7.53
  -7  -5  -2  107.98   10.61
  -8   5  -2   69.59    9.37
  -8   5  -2   57.48    8.75
  -8  -5  -2   64.45    7.57
  -8  -5  -2   76.37    7.69
   8  -5   2   73.04    7.75
   8  -5   2   67.16    7.76
  -8  -5  -2   65.19    7.51
   8  -5   2   62.41    7.46
   8   5   2   49.73    5.24
  -8   5  -2   65.35    8.76
  -8  -5  -2   59.05    7.07
  -8  -5  -2   58.31    7.05
  -8   5  -2   53.52    8.72
  -8  -5  -2   67.25    8.86
  -8  -5  -2   56.23    8.52
  -9  -5  -2  132.54   10.73
   9  -5   2  133.98   11.13
  -9  -5  -2  141.54   13.09
  -9  -5  -2  139.42   10.90
  -9   5  -2  128.27   13.29
  -9   5  -2  137.34   13.19
  -9  -5  -2  127.22   10.56
  -9  -5  -2  127.81   10.52
  -9  -5  -2  136.17   12.81
  -9  -5  -2  128.98   10.71
   9  -5   2  135.33   11.28
  -9   5  -2  137.21   12.85
   9  -5   2  134.85   11.11
  -9   5  -2  128.30   12.97
   9   5   2  125.24    8.59
  10  -5   2  108.24   10.17
 -10   5  -2  115.83   12.94
  10  -5   2  109.32   10.50
 -10  -5  -2   70.28    9.04
 -10  -5  -2  117.56   12.28
 -10   5  -2  117.49   12.61
  10   5   2  109.66    7.42
 -10  -5  -2   96.06    9.82
 -10  -5  -2   97.23   10.29
 -10   5  -2   99.14   11.83
 -10  -5  -2  123.13   12.51
 -10   5  -2  101.49   11.71
 -10  -5  -2   87.95    9.80
  10  -5   2   88.97    9.95
 -10  -5  -2  102.42   10.22
 -11  -5  -2    2.83    4.03
 -11   5  -2   14.46    6.13
 -11   5  -2    5.04    5.26
  11  -5   2    4.54    4.24
 -11  -5  -2    1.98    3.68
 -11  -5  -2    9.16    4.84
 -11  -5  -2    4.89    5.22
 -11   5  -2    0.94    4.78
 -11   5  -2    2.92    4.36
 -11  -5  -2    9.14    4.69
 -11  -5  -2    1.43    4.31
 -11  -5  -2    7.06    5.04
  11   5   2    6.88    2.75
  11  -5   2   12.29    5.52
  11  -5   2   17.11    5.94
 -12  -5  -2    9.86    5.68
 -12  -5  -2    6.97    4.24
 -12   5  -2   13.26    5.82
 -12  -5  -2    4.53    5.36
  12   5   2   13.58    3.39
 -12  -5  -2    8.12    5.24
 -12  -5  -2   15.25    6.37
 -12   5  -2    3.17    4.79
 -12   5  -2    4.25    4.85
 -12  -5  -2    9.91    5.45
  12  -5   2    8.22    4.68
 -12   5  -2   12.91    5.74
  13  -5   2   14.15    5.72
 -13   5  -2   11.84    6.55
 -13  -5  -2   18.51    7.13
 -13   5  -2   11.32    6.07
 -13   5  -2   10.64    5.97
 -13  -5  -2   23.21    6.22
 -13  -5  -2   11.49    5.78
 -13   5  -2    5.02    5.09
 -13  -5  -2   21.26    7.42
 -13  -5  -2   16.56    6.56
  13   5   2   12.53    3.46
  14   5   2   14.21    3.87
  14  -5   2    7.31    5.08
 -14  -5  -2   17.15    7.32
 -14  -5  -2   11.10    7.36
 -14   5  -2   13.46    7.03
 -14  -5  -2    9.51    6.34
 -14   5  -2    2.08    5.25
 -14  -5  -2   12.02    7.61
 -14   5  -2   17.43    7.56
  15   5   2    0.64    3.63
 -15   5  -2   -0.82    5.64
 -15   5  -2   -3.38    5.43
 -15  -5  -2   11.25    7.00
 -15   5  -2    4.85    6.27
 -15   6   2   11.28    6.81
 -15   6   2    8.53    6.71
  15  -6  -2    4.39    6.25
 -15   6   2    9.27    6.15
  15  -6  -2    9.04    6.44
 -15  -6   2   13.25    6.39
 -15  -6   2   -2.27    5.50
 -15  -6   2   18.40    6.74
  15  -6  -2    3.88    5.55
  15   6  -2   10.77    5.55
 -15  -6   2   12.02    6.98
 -14  -6   2    3.44    4.93
 -14   6   2    2.22    5.35
 -14  -6   2   10.00    6.63
  14   6  -2    1.89    4.56
  14  -6  -2   -1.98    5.57
 -14   6   2    2.29    5.52
 -14  -6   2   -3.83    3.94
 -14   6   2   -0.79    5.27
 -14  -6   2    1.37    4.92
 -14   6   2   -0.41    4.14
  14  -6  -2    5.20    5.63
 -14  -6   2    5.60    5.52
  14  -6  -2    0.91    4.68
 -13  -6   2   10.08    5.43
 -13  -6   2    9.38    5.88
  13  -6  -2   -1.56    3.38
 -13   6   2    9.71    6.30
  13   6  -2    0.73    3.76
 -13  -6   2    6.08    4.66
 -13  -6   2   -8.90    4.65
 -13   6   2    5.57    4.96
 -13   6   2    9.50    6.07
 -13  -6   2    0.15    3.87
 -13  -6   2    2.19    4.62
  13  -6  -2    2.83    5.40
  13   6  -2    6.72    4.33
 -13   6   2   -0.63    4.99
  13  -6  -2    3.56    4.99
  12  -6  -2   -0.79    3.79
  12  -6  -2   13.70    5.96
 -12  -6   2   14.53    5.19
 -12   6   2   11.80    6.16
 -12   6   2    3.48    4.93
 -12  -6   2   12.93    5.11
 -12  -6   2   11.01    4.62
 -12  -6   2    7.96    4.48
  12  -6  -2   18.80    6.59
 -12  -6   2    0.39    4.85
 -12   6   2   18.49    6.70
  12   6  -2   19.92    5.52
  12   6  -2   10.69    4.44
 -12   6   2    5.08    4.35
 -12  -6   2   12.80    6.41
 -11   6   2    5.48    4.88
  11  -6  -2    5.97    4.11
 -11  -6   2    3.10    3.53
 -11  -6   2    6.32    3.89
 -11   6   2    9.66    5.26
 -11   6   2    3.31    1.93
  11   6  -2    2.37    3.44
  11  -6  -2    9.41    5.35
 -11  -6   2   10.69    4.54
 -11  -6   2   13.10    5.87
 -11   6   2    3.04    3.80
 -11   6   2   -2.05    3.98
  11  -6  -2    6.01    4.77
  11   6  -2    0.06    3.65
 -11  -6   2    6.97    4.04
 -11  -6   2    5.13    5.11
 -10  -6   2   56.53    9.63
 -10  -6   2   50.23    7.25
  10  -6  -2   59.58    9.01
  10  -6  -2   65.02    8.92
 -10   6   2   70.13   10.07
 -10  -6   2   36.06    6.62
 -10  -6   2   68.72   10.12
  10   6  -2   69.70    7.95
 -10  -6   2   65.14    7.84
  10  -6  -2   61.71    8.11
 -10   6   2   54.51    5.18
 -10  -6   2   76.30    8.37
 -10   6   2   68.73    9.64
 -10   6   2   76.16   10.24
  10   6  -2   60.98    7.57
 -10   6   2   54.67    8.09
  -9  -6   2    4.94    3.24
   9   6  -2    2.45    2.91
  -9   6   2    1.75    1.69
   9  -6  -2    9.78    4.81
   9  -6  -2    0.39    3.37
   9  -6  -2    7.79    3.67
  -9   6   2    2.65    4.18
  -9  -6   2    3.37    4.49
  -9   6   2    3.39    3.51
  -9   6   2    5.43    4.40
  -9  -6   2    1.27    3.08
  -9  -6   2    3.53    3.00
   9   6  -2    5.04    3.55
  -9  -6   2   -0.72    3.95
   9  -6  -2   10.77    4.39
  -9  -6   2    3.00    3.25
  -9   6   2    2.25    3.98
  -8   6   2   65.10    8.44
  -8  -6   2   56.17    7.04
   8  -6  -2   53.77    6.01
  -8  -6   2   56.62    6.65
  -8  -6   2   43.32    7.88
   8  -6  -2   58.97    7.95
  -8  -6   2   54.29    6.39
  -8   6   2   51.12    4.97
  -8   6   2   40.90    4.75
  -8  -6   2   60.40    6.76
  -8   6   2   57.86    7.28
   8  -6  -2   53.56    7.06
  -8   6   2   54.05    8.02
   8   6  -2   46.02    6.44
  -8   6   2   43.73    7.54
   8   6  -2   61.58    7.38
  -8  -6   2   63.14    9.10
   8  -6  -2   52.32    7.67
   7  -6  -2   -2.50    2.39
  -7  -6   2    3.38    2.40
   7  -6  -2    2.71    2.87
  -7   6   2    4.02    3.18
   7  -6  -2    4.62    3.57
   7  -6  -2    1.68    3.00
  -7  -6   2    0.39    3.61
  -7   6   2   -0.21    2.14
  -7  -6   2    5.12    3.01
   7   6  -2    4.20    2.80
  -7   6   2    7.76    3.41
  -7   6   2    1.79    2.96
  -7   6   2    3.34    1.86
  -7  -6   2    4.12    3.53
  -7   6   2    5.18    3.39
   7  -6  -2    0.72    2.87
  -7  -6   2    0.09    2.24
  -7  -6   2   -2.33    1.85
   7   6  -2    5.07    3.38
   6  -6  -2    8.33    3.86
  -6  -6   2    3.60    3.18
   6  -6  -2    1.66    2.64
  -6   6   2    3.32    1.43
  -6   6   2    5.30    3.25
  -6   6   2    5.84    2.93
   6  -6  -2    0.16    2.05
   6  -6  -2    6.04    3.84
  -6   6   2    4.48    2.70
   6  -6  -2    1.70    3.08
   6   6  -2    4.02    2.49
  -6  -6   2    4.85    2.53
  -6  -6   2    0.56    3.07
  -6  -6   2    2.16    2.10
  -6   6   2    2.76    1.83
  -6  -6   2    3.08    2.40
  -6   6   2    4.38    3.00
  -6  -6   2    2.57    2.68
  -6   6   2    8.34    3.50
   6   6  -2    1.63    2.95
  -5  -6   2  343.49   20.05
  -5  -6   2  342.74   20.83
  -5   6   2  364.13   18.95
  -5   6   2  343.90   19.01
   5  -6  -2  351.59   19.60
  -5   6   2  344.58   18.69
  -5   6   2  340.31   19.24
  -5  -6   2  381.14   17.88
  -5   6   2  353.12   17.82
  -5   6   2  341.92   17.09
   5  -6  -2  348.07   19.70
   5   6  -2  374.66   21.23
  -5   6   2  365.41   21.86
  -5  -6   2  323.33   18.07
  -5  -6   2  344.02   17.74
   5   6  -2  328.77   19.18
  -5  -6   2  330.95   18.83
   5  -6  -2  336.51   17.70
   5  -6  -2  352.36   20.26
   5  -6  -2  354.24   20.06
  -5   6   2  353.22   19.01
  -4   6   2    2.86    1.81
   4  -6  -2    6.78    3.15
   4   6  -2    5.60    2.45
  -4  -6   2    8.63    1.86
   4  -6  -2    7.37    2.91
  -4   6   2    8.06    2.96
  -4  -6   2   10.39    2.73
  -4  -6   2   10.10    2.78
   4   6  -2    2.01    2.73
  -4   6   2    6.97    2.57
  -4  -6   2    3.03    3.38
   4  -6  -2    8.10    3.45
   4  -6  -2    6.20    3.29
  -4   6   2    2.16    2.49
  -4   6   2    1.72    3.60
   4  -6  -2    4.72    2.76
  -4  -6   2    3.18    2.40
  -4  -6   2    5.87    3.43
  -4   6   2    5.37    1.89
   4  -6  -2    5.89    2.44
  -4   6   2    7.10    2.92
  -4  -6   2    5.85    2.22
   4   6  -2   12.83    3.02
   3  -6  -2  128.13    9.50
  -3   6   2  137.14    8.53
   3  -6  -2  138.42   10.18
   3   6  -2  144.20    9.54
  -3   6   2  127.22    8.51
   3  -6  -2  135.74    8.39
  -3  -6   2  127.31    9.28
  -3   6   2  137.78    9.67
  -3  -6   2  143.75    6.98
   3  -6  -2  135.12    9.88
  -3   6   2  136.23   11.42
   3   6  -2  146.12    9.25
  -3  -6   2  128.74    9.27
  -3  -6   2  120.17   10.14
   3   6  -2  142.27   11.20
  -3  -6   2  140.10   10.51
   3  -6  -2  153.62    8.87
  -3  -6   2  141.98    8.90
  -3  -6   2  148.61    8.76
  -3   6   2  124.88    8.62
   3  -6  -2  152.72    9.09
  -3  -6   2  143.69    7.13
  -3  -6   2  140.84    8.31
  -3  -6   2  141.57    8.70
   3  -6  -2  145.13   10.52
  -2  -6   2    4.48    2.22
   2  -6  -2    5.60    2.45
  -2  -6   2    5.87    1.69
   2   6  -2    2.65    2.45
  -2   6   2    4.92    1.95
   2   6  -2   -0.49    2.59
   2  -6  -2    1.88    2.09
   2  -6  -2    5.50    2.12
  -2  -6   2    4.11    2.07
  -2   6   2    3.91    1.87
  -2  -6   2    4.29    2.55
  -2   6   2    1.48    2.32
   2   6  -2    4.39    2.39
  -2  -6   2   11.11    2.83
   2  -6  -2    8.03    3.31
  -2  -6   2    5.14    2.38
   2   6  -2    2.41    1.74
   2  -6  -2    6.21    2.67
  -2  -6   2    3.99    2.99
   2  -6  -2    3.89    2.77
   2  -6  -2    6.88    2.38
  -2   6   2   -0.33    2.33
  -2  -6   2    4.49    2.71
   2  -6  -2    4.02    2.32
  -1  -6   2   77.18    6.51
  -1   6   2   79.34    6.12
   1  -6  -2   79.64    7.96
  -1  -6   2   92.42    6.87
  -1  -6   2   93.93    7.41
  -1  -6   2   87.69    7.97
   1   6  -2   89.54    6.51
   1   6  -2   90.67    9.15
   1  -6  -2   74.81    6.33
   1  -6  -2   88.75    5.68
  -1  -6   2   80.44    5.60
  -1   6   2   97.67    9.32
   1  -6  -2   78.04    8.12
   1  -6  -2   81.69    6.71
  -1  -6   2   89.34    6.62
  -1   6   2   83.00    5.65
  -1  -6   2   88.39    8.25
   1  -6  -2   92.16    7.15
   1   6  -2   91.09    6.75
   1  -6  -2   80.93    5.38
   1  -6  -2   80.01    6.94
  -1   6   2  100.67    7.51
  -1  -6   2   80.42    6.33
   1   6  -2   91.89    6.70
   1   6  -2   97.19    7.21
   0  -6   2  249.33   14.14
   0  -6   2  235.11   12.22
   0  -6  -2  230.23   11.60
   0   6   2  222.72   13.26
   0   6  -2  231.22   13.24
   0  -6  -2  226.66   13.36
   0  -6   2  261.36   13.49
   0  -6   2  242.04   13.61
   0   6  -2  217.87   15.66
   0  -6   2  220.07   12.93
   0   6   2  234.88   11.78
   0   6  -2  247.34   13.67
   0   6  -2  235.26   12.97
   0  -6  -2  220.89   14.12
   0   6   2  277.11   16.09
   0  -6  -2  228.28   13.31
   0  -6  -2  226.40   11.40
   0  -6   2  216.87   13.93
   0  -6  -2  227.15   13.54
   0  -6  -2  220.42   11.25
   0  -6  -2  221.50   14.54
   0   6  -2  238.78   12.91
   0  -6  -2  227.48   12.63
   0  -6   2  231.05   13.40
   0  -6   2  246.25   14.48
   1   6   2   91.01    6.75
  -1  -6  -2   78.85    5.57
  -1  -6  -2   82.79    6.98
  -1   6  -2   93.03    6.71
  -1  -6  -2   80.44    4.80
  -1   6  -2   89.59    6.35
  -1  -6  -2   84.80    7.41
   1   6   2   96.65    8.97
   1  -6   2   91.82    7.90
   1  -6   2   93.67    7.71
  -1  -6  -2   83.41    8.21
  -1   6  -2   79.92    8.92
   1  -6   2   75.06    7.50
   1  -6   2   83.37    6.84
   1  -6   2   98.26    7.29
   1  -6   2   80.73    5.96
  -1  -6  -2   86.28    6.58
  -1   6  -2   88.23    6.47
   1  -6   2   70.46    7.18
  -1  -6  -2   84.80    8.51
  -1   6  -2   71.47    6.29
   1  -6   2   83.44    6.81
  -1   6  -2   82.54    7.24
  -2   6  -2   92.73    8.01
  -2   6  -2  125.33    8.20
   2  -6   2  124.03    8.96
  -2   6  -2  130.55    8.11
   2  -6   2  115.28    8.66
  -2  -6  -2  114.54    9.53
  -2   6  -2  109.07    8.39
   2   6   2  119.27    7.86
   2   6   2  135.24    9.98
  -2  -6  -2  117.83    8.82
   2  -6   2  126.25    9.15
   2  -6   2  119.41    9.34
   2  -6   2  108.55    7.63
   2  -6   2  118.48    8.80
  -2  -6  -2  112.80    6.45
   2  -6   2  118.11    8.92
  -2  -6  -2  121.52    6.06
  -2  -6  -2  110.71    8.67
  -2   6  -2  119.56    7.68
   2  -6   2  117.40    9.03
  -2   6  -2  138.56   11.19
  -2  -6  -2  120.06   10.10
   3  -6   2    2.53    2.64
   3  -6   2   12.64    3.68
  -3   6  -2    4.30    1.90
  -3  -6  -2    6.96    1.75
  -3   6  -2    2.64    2.56
   3   6   2    8.21    3.29
  -3  -6  -2    8.21    3.52
  -3   6  -2    4.61    2.55
  -3  -6  -2    1.68    3.01
   3  -6   2    0.17    2.11
   3  -6   2    4.81    2.68
  -3   6  -2    5.68    1.97
   3  -6   2   -0.18    1.96
   3  -6   2    6.29    2.88
  -3  -6  -2    8.43    3.25
  -3  -6  -2    4.75    2.94
  -3   6  -2    7.56    2.41
  -3   6  -2    0.28    3.20
  -4   6  -2  174.75   12.50
   4  -6   2  180.36   10.83
   4  -6   2  189.15   12.48
  -4  -6  -2  175.32   13.21
   4  -6   2  206.21   12.47
   4   6   2  173.29   12.37
   4  -6   2  183.17   12.71
   4  -6   2  197.30   13.06
  -4   6  -2  191.86   12.67
   4  -6   2  172.25   11.73
  -4  -6  -2  189.80   12.37
  -4  -6  -2  171.64   12.24
  -4   6  -2  182.78   10.90
  -4   6  -2  175.46   10.35
  -4   6  -2  192.15   10.87
  -4  -6  -2  192.67   10.29
  -4   6  -2  188.94   12.51
  -4   6  -2  177.14   10.81
  -4  -6  -2  169.05   12.77
  -5   6  -2  186.64   12.82
  -5   6  -2  188.85   10.62
  -5   6  -2  177.06   10.58
  -5  -6  -2  167.48   12.21
  -5   6  -2  189.53   13.30
   5  -6   2  180.34   12.48
  -5  -6  -2  176.17   13.45
   5  -6   2  182.68   12.03
  -5  -6  -2  191.97   13.71
   5  -6   2  200.77   12.55
  -5   6  -2  182.16   12.88
   5  -6   2  176.70   10.88
   5   6   2  177.29   12.29
  -5   6  -2  163.56   10.60
  -5  -6  -2  188.73   10.81
  -5  -6  -2  188.79   12.72
   5  -6   2  192.12   13.07
   5  -6   2  202.05   13.62
  -6  -6  -2    5.12    3.78
  -6   6  -2    3.30    3.31
  -6   6  -2    5.37    4.13
  -6   6  -2    5.47    2.26
  -6  -6  -2    2.98    3.49
   6  -6   2    0.76    2.62
   6  -6   2    4.55    3.67
   6  -6   2    2.19    3.07
  -6  -6  -2    2.94    3.24
   6  -6   2    7.15    3.70
  -6  -6  -2   11.39    3.17
  -6  -6  -2    2.67    2.81
  -6   6  -2    3.97    1.76
   6   6   2    4.67    2.75
  -6   6  -2    3.97    3.51
   6  -6   2    7.13    3.64
  -7  -6  -2   85.19    7.74
   7  -6   2   98.85    9.22
   7   6   2   85.14    7.70
   7  -6   2   79.14    8.54
  -7  -6  -2   69.93    8.40
   7  -6   2   69.67    9.52
   7  -6   2  100.34    9.47
  -7  -6  -2  100.91   10.68
  -7  -6  -2   86.95   10.04
  -7   6  -2   81.21    9.55
  -7   6  -2   77.92    9.72
  -7   6  -2   77.26    6.07
  -7   6  -2  102.40   10.46
  -7  -6  -2   71.77    8.32
   8   6   2   44.01    5.54
  -8  -6  -2   41.85    6.62
  -8  -6  -2   37.74    6.64
  -8  -6  -2   37.79    7.66
   8  -6   2   45.69    6.98
  -8  -6  -2   28.60    5.53
   8  -6   2   34.85    7.67
   8  -6   2   44.88    6.87
  -8  -6  -2   30.54    7.14
   8  -6   2   49.67    7.24
  -8   6  -2   37.98    7.63
  -8   6  -2   34.23    3.69
  -8   6  -2   41.14    7.91
  -8   6  -2   39.04    7.51
  -9  -6  -2    7.44    4.28
   9  -6   2    5.52    4.12
  -9  -6  -2    5.74    5.15
   9   6   2    8.57    3.63
   9  -6   2    1.55    3.82
  -9  -6  -2   10.14    4.59
  -9   6  -2   12.56    5.56
  -9   6  -2    2.77    4.15
  -9  -6  -2    3.44    4.63
   9  -6   2   10.43    4.58
  -9   6  -2    9.40    5.26
 -10  -6  -2   20.66    5.59
 -10  -6  -2   27.36    7.39
  10  -6   2   15.84    5.88
  10  -6   2   26.49    6.16
 -10   6  -2   23.21    6.74
 -10  -6  -2   11.13    4.82
  10  -6   2   38.85    7.46
 -10  -6  -2   30.10    7.74
  10   6   2   17.80    4.38
 -10   6  -2   35.44    8.12
 -10   6  -2   27.22    7.39
  11  -6   2   25.71    6.79
 -11  -6  -2   17.66    6.77
 -11   6  -2    2.39    4.95
 -11   6  -2   16.86    6.27
 -11   6  -2   12.02    6.02
  11   6   2   11.34    3.97
 -11  -6  -2   11.15    6.20
 -11  -6  -2   16.36    5.16
 -11   6  -2   13.76    6.23
 -12   6  -2    4.99    5.53
 -12   6  -2    2.15    4.78
 -12  -6  -2    3.14    5.21
 -12   6  -2   -5.45    4.18
  12  -6   2   -0.88    3.90
  12   6   2   -1.94    3.04
 -12  -6  -2   -0.05    4.23
 -12   6  -2    3.07    5.53
 -12  -6  -2    3.80    5.21
 -13  -6  -2    1.58    5.85
  13  -6   2    0.52    4.56
 -13   6  -2    4.28    5.62
 -13   6  -2    7.04    6.50
  13   6   2    7.55    4.06
 -13  -6  -2    3.58    4.93
 -13   6  -2    2.71    5.03
 -13   6  -2    2.12    5.11
  13   6   2    2.73    4.56
 -13  -6  -2    7.40    6.45
 -14   6  -2   26.73    8.62
  14  -6   2   32.17    7.62
  14   6   2   36.85    6.22
 -14   6  -2   54.71   11.10
 -14   6  -2   39.16   10.06
 -14  -6  -2   27.66    7.25
 -14  -6  -2   31.86    9.45
 -14   7   2   24.62    8.12
 -14  -7   2   29.85    7.79
 -14  -7   2   37.51    9.53
 -14   7   2   31.02    8.85
 -14   7   2   45.26    9.97
 -14  -7   2   19.75    7.10
  14   7  -2   46.22    8.51
  14  -7  -2   23.85    7.69
  14   7  -2   41.72    7.70
  14  -7  -2   28.83    8.89
 -14   7   2   37.26    9.68
  14  -7  -2   35.97    8.42
 -13  -7   2   11.10    5.31
  13  -7  -2    5.55    4.99
  13   7  -2   12.45    5.27
 -13  -7   2   16.84    7.11
  13  -7  -2   15.75    6.94
 -13   7   2    9.27    6.49
 -13   7   2    8.94    5.99
  13   7  -2    5.65    5.23
 -13  -7   2    5.33    5.24
  13  -7  -2   11.41    6.96
 -13   7   2   15.79    6.60
 -13  -7   2    1.39    4.89
 -13  -7   2    6.90    6.36
 -13   7   2   -0.45    4.50
 -13  -7   2   15.03    6.26
 -12  -7   2    1.65    3.64
 -12  -7   2    2.30    4.11
  12   7  -2   12.14    4.88
  12  -7  -2   10.66    6.20
  12  -7  -2    3.47    5.51
 -12  -7   2   -0.85    4.75
  12  -7  -2    6.59    4.99
 -12   7   2    4.87    5.15
  12   7  -2    2.60    4.62
 -12  -7   2    4.94    5.79
 -12   7   2    1.07    5.10
 -12   7   2   -2.98    4.22
 -12   7   2    0.11    1.62
 -12  -7   2    1.88    4.12
 -12  -7   2   -0.06    4.17
 -12   7   2    3.55    4.83
  11   7  -2   18.41    5.27
 -11  -7   2    3.93    5.29
 -11   7   2   10.94    2.77
 -11   7   2    7.67    5.55
 -11  -7   2    4.87    3.99
  11  -7  -2   10.15    5.85
 -11   7   2    7.12    4.79
 -11  -7   2   12.69    4.90
 -11   7   2    9.45    5.75
 -11  -7   2    5.94    5.39
 -11  -7   2   14.42    5.15
 -11   7   2   16.49    6.95
  11  -7  -2    4.29    4.37
  11  -7  -2    4.82    4.27
 -11  -7   2   15.52    5.25
  11   7  -2   14.44    5.20
  10   7  -2   11.85    4.62
  10  -7  -2    3.55    4.78
 -10  -7   2   12.46    4.72
 -10   7   2   11.56    6.30
 -10  -7   2   14.65    6.19
 -10  -7   2   12.29    4.56
  10   7  -2    2.89    4.08
 -10   7   2    6.38    2.36
 -10  -7   2    8.34    4.22
 -10   7   2   10.04    5.46
 -10  -7   2    8.83    4.37
  10  -7  -2    3.48    4.11
 -10   7   2    9.67    5.50
 -10  -7   2   15.01    5.88
 -10   7   2   10.17    4.76
  10  -7  -2   12.35    5.57
  -9   7   2    2.52    3.66
  -9   7   2   20.08    6.16
   9  -7  -2   19.64    5.88
   9  -7  -2   11.28    4.87
  -9  -7   2   16.90    4.64
  -9   7   2   16.15    5.48
   9   7  -2   16.72    5.59
  -9  -7   2    2.76    3.63
  -9   7   2   14.81    3.26
   9  -7  -2    9.72    4.17
  -9  -7   2   21.71    6.96
  -9  -7   2   18.10    5.08
   9  -7  -2   16.37    5.73
  -9  -7   2   24.03    6.76
  -9   7   2   18.35    3.25
  -9   7   2   14.68    4.98
  -9  -7   2   15.18    4.27
   9   7  -2   12.58    4.66
  -8   7   2   78.66    8.94
  -8   7   2   97.36   10.10
   8   7  -2   72.62    9.07
   8  -7  -2   94.90   10.54
   8  -7  -2   76.92    9.00
  -8  -7   2   92.23    8.18
  -8  -7   2   54.36    9.39
  -8   7   2   89.00   10.02
   8   7  -2  102.61    9.60
  -8   7   2   78.56    6.92
  -8  -7   2   83.89   11.02
  -8   7   2   74.36    6.95
  -8  -7   2   71.42    8.49
   8  -7  -2   98.58   10.67
   8  -7  -2   78.72    7.66
  -8  -7   2   88.00    8.17
  -8  -7   2   83.20    8.21
  -8   7   2   99.11   10.07
   7   7  -2    2.94    3.02
  -7   7   2    0.44    1.64
  -7  -7   2    7.26    4.31
  -7   7   2   10.47    3.76
   7   7  -2    9.92    4.56
  -7   7   2    4.03    3.12
  -7  -7   2    3.22    4.17
  -7  -7   2    9.42    3.33
  -7   7   2   13.86    4.74
   7  -7  -2    3.69    3.06
  -7  -7   2    7.06    3.12
   7  -7  -2    6.42    4.05
   7  -7  -2    1.70    3.08
   7  -7  -2    3.68    3.99
  -7   7   2   12.94    4.67
  -7   7   2   14.44    5.10
  -7  -7   2    2.63    3.10
  -7  -7   2   10.39    3.35
   7  -7  -2   19.57    5.77
   6  -7  -2  146.09   11.95
  -6   7   2  147.11   11.14
   6  -7  -2  172.44   10.46
   6  -7  -2  173.03   12.21
  -6  -7   2  144.96   10.18
   6  -7  -2  147.41   12.17
   6  -7  -2  171.80   12.25
  -6   7   2  155.57   10.05
   6   7  -2  168.80   12.95
   6   7  -2  136.77   11.13
  -6  -7   2  152.07   13.56
  -6  -7   2  162.88   10.18
  -6   7   2  141.22   11.00
  -6   7   2  142.96   11.16
  -6  -7   2  157.00   12.62
  -6   7   2  153.70   10.82
  -6  -7   2  142.31    9.98
   5  -7  -2   65.78    7.05
  -5   7   2   46.99    5.48
   5  -7  -2   56.65    7.46
  -5  -7   2   58.92    8.40
   5   7  -2   39.09    7.16
  -5  -7   2   59.07    5.84
  -5   7   2   65.37    7.11
  -5   7   2   60.45    4.85
  -5  -7   2   45.76    7.85
  -5  -7   2   54.95    5.60
   5   7  -2   54.46    6.66
  -5  -7   2   49.99    6.79
   5  -7  -2   48.90    6.67
  -5   7   2   66.45    6.66
   5  -7  -2   57.04    5.87
   5  -7  -2   53.83    7.58
  -5   7   2   57.25    6.68
  -5  -7   2   57.01    3.49
  -5  -7   2   50.77    5.36
  -5   7   2   64.18    7.02
  -5   7   2   62.09    9.15
   5  -7  -2   44.80    7.12
  -4   7   2    1.62    2.42
  -4  -7   2   -1.88    2.90
   4  -7  -2    3.21    2.94
   4   7  -2    3.82    3.55
  -4  -7   2    2.29    2.57
   4  -7  -2    0.65    2.45
   4  -7  -2    2.00    2.24
   4  -7  -2   -1.04    2.82
  -4  -7   2    0.73    1.91
   4  -7  -2    4.09    2.95
   4  -7  -2   -1.98    3.12
   4   7  -2    1.15    2.03
  -4   7   2    0.07    2.57
  -4  -7   2    0.77    2.02
  -4  -7   2   -0.25    2.94
  -4   7   2    1.29    1.74
  -4   7   2    4.71    4.36
  -4   7   2   -2.10    1.33
   4  -7  -2    1.08    2.55
  -4   7   2    1.05    2.86
  -4  -7   2    0.67    1.38
  -4   7   2    2.20    3.02
   4   7  -2    0.14    3.02
  -4  -7   2    1.60    2.11
  -3   7   2   14.45    3.20
   3  -7  -2    9.64    3.91
  -3   7   2    1.66    1.91
  -3   7   2    3.78    2.05
  -3   7   2   17.97    4.41
  -3  -7   2    7.21    2.48
  -3  -7   2    8.60    2.42
   3   7  -2    6.69    3.79
  -3  -7   2    6.28    2.24
   3   7  -2    8.84    3.05
   3  -7  -2    5.33    2.63
  -3  -7   2    3.25    2.91
  -3  -7   2    4.12    3.29
  -3  -7   2    8.49    2.60
  -3  -7   2    2.70    1.30
   3  -7  -2    4.83    3.41
   3  -7  -2    7.72    2.89
   3   7  -2    3.45    2.96
   3  -7  -2    4.18    2.90
   3  -7  -2    2.40    2.36
  -3  -7   2    5.86    3.32
   3  -7  -2    1.35    2.68
  -3   7   2   14.15    5.29
  -2   7   2   38.98    4.44
   2  -7  -2   52.57    5.72
  -2   7   2   41.62    5.79
  -2  -7   2   51.57    5.16
   2  -7  -2   52.59    4.76
  -2  -7   2   42.33    4.94
   2  -7  -2   35.01    6.36
  -2   7   2   38.17    4.60
   2   7  -2   45.84    7.51
   2  -7  -2   46.04    4.47
   2   7  -2   49.77    5.95
  -2  -7   2   27.00    5.85
  -2  -7   2   49.23    5.03
   2  -7  -2   34.77    5.25
  -2  -7   2   41.58    6.48
   2  -7  -2   48.38    6.96
  -2   7   2   40.27    4.85
  -2  -7   2   45.33    3.89
   2   7  -2   38.22    5.02
  -2  -7   2   43.93    4.97
   2   7  -2   43.52    5.14
   2  -7  -2   38.31    5.45
   1  -7  -2   78.16    5.57
   1   7  -2   78.53    9.75
  -1  -7   2   80.54    6.56
  -1  -7   2  101.17    9.28
  -1  -7   2   82.71    7.04
   1   7  -2   77.67    7.06
   1  -7  -2   85.25    7.37
   1   7  -2   91.04    7.87
  -1   7   2   99.90    8.31
   1   7  -2   86.79    6.92
   1  -7  -2   86.58    7.46
  -1  -7   2   73.30    7.76
   1  -7  -2   82.45    5.71
  -1   7   2   86.22    6.61
  -1  -7   2   79.20    6.99
  -1  -7   2  101.37    8.96
   1   7  -2   86.53    7.22
   1  -7  -2   95.40    9.36
  -1  -7   2   80.12    5.77
   1  -7  -2   82.43    8.76
  -1   7   2   78.58    5.86
  -1   7   2   86.90    9.67
  -1  -7   2   75.65    7.16
   0   7   2    1.33    3.23
   0  -7   2    0.55    2.81
   0  -7   2    3.24    3.07
   0  -7  -2    0.07    2.82
   0   7  -2    3.91    2.40
   0  -7   2    4.83    2.35
   0   7  -2    2.08    3.45
   0  -7  -2    1.69    2.08
   0   7  -2    6.84    3.36
   0  -7   2   -1.41    2.46
   0  -7   2    0.09    2.55
   0  -7  -2    3.24    1.62
   0  -7   2    3.08    2.60
   0   7  -2    3.31    2.19
   0  -7   2    0.48    1.96
   0  -7  -2    1.20    2.33
   0  -7  -2    4.70    3.18
   0   7   2    3.60    3.03
   0   7  -2   11.73    3.20
   0  -7   2    3.51    2.62
   0  -7  -2    1.07    1.60
   0  -7  -2    3.78    2.72
   1  -7   2  186.23   12.77
  -1  -7  -2  188.09   11.97
   1   7   2  183.68   13.81
   1  -7   2  161.20   12.33
  -1   7  -2  180.21   11.26
   1  -7   2  152.48   11.55
  -1   7  -2  190.44   12.12
  -1   7  -2  180.37   11.00
   1  -7   2  170.09   10.48
   1  -7   2  174.30   11.73
  -1  -7  -2  184.57   13.33
  -1   7  -2  187.19   11.47
  -1  -7  -2  177.47   10.17
   1  -7   2  194.55   11.82
  -1   7  -2  188.73   11.40
   1  -7   2  202.83   11.84
  -1  -7  -2  187.44   12.23
  -1   7  -2  195.91   14.79
  -1  -7  -2  178.89   12.90
  -1  -7  -2  175.56    9.32
   1   7   2  178.65   11.58
   1  -7   2  192.74   12.45
  -2  -7  -2   23.52    5.55
  -2   7  -2   30.91    4.83
  -2   7  -2   30.59    6.84
   2  -7   2   28.89    5.13
  -2   7  -2   35.79    4.28
  -2   7  -2   29.77    5.11
   2  -7   2   34.55    4.30
   2  -7   2   25.10    4.95
   2  -7   2   27.49    5.25
   2  -7   2   32.86    5.68
   2  -7   2   40.03    6.04
   2  -7   2   27.55    5.26
  -2   7  -2   33.84    4.56
  -2  -7  -2   28.93    5.06
   2  -7   2   31.25    5.48
  -2  -7  -2   29.66    5.05
  -2   7  -2   27.58    3.98
  -2  -7  -2   29.24    2.84
   2   7   2   29.67    6.07
  -2  -7  -2   36.93    6.59
   3  -7   2   -1.00    3.06
   3  -7   2    3.21    3.22
   3  -7   2    0.62    2.57
  -3  -7  -2   -1.06    2.76
   3  -7   2   -2.78    2.30
  -3   7  -2    0.79    1.97
   3  -7   2    1.87    2.93
  -3   7  -2    4.34    4.51
   3  -7   2    3.66    3.08
  -3  -7  -2    1.68    2.60
   3   7   2    2.57    2.94
  -3   7  -2   -0.19    2.49
  -3  -7  -2    1.62    3.14
  -3   7  -2    0.78    1.83
  -3   7  -2    3.46    2.80
   3  -7   2    2.68    3.06
  -3  -7  -2    0.11    2.39
   3  -7   2   -0.76    2.62
  -3   7  -2   -0.55    1.51
   4  -7   2   72.86    7.81
   4  -7   2   71.05    7.92
   4  -7   2   68.18    8.05
  -4  -7  -2   65.00    7.63
  -4   7  -2   70.13    7.92
  -4   7  -2   66.21    5.98
  -4   7  -2   73.55    6.21
  -4   7  -2   75.55    6.78
   4  -7   2   72.92    6.60
   4  -7   2   49.79    7.34
  -4  -7  -2   56.69    7.30
  -4  -7  -2   61.68    8.74
   4   7   2   69.21    8.20
  -4   7  -2   69.44    8.13
  -4  -7  -2   65.99    8.62
  -4   7  -2   67.48    8.18
  -4   7  -2   58.02    6.10
  -5  -7  -2   60.37    8.87
  -5   7  -2   58.24    5.63
   5   7   2   85.22    8.72
  -5   7  -2   52.38    7.76
  -5   7  -2   71.43    6.54
  -5  -7  -2   57.67    8.78
  -5  -7  -2   68.41    8.14
  -5   7  -2   65.36    8.20
  -5  -7  -2   69.57    8.11
   5  -7   2   51.51    7.42
   5  -7   2   63.43    7.79
  -5   7  -2   53.79    5.94
  -5   7  -2   74.51    8.64
   5  -7   2   94.61    9.20
   5  -7   2   74.84    8.72
   5  -7   2   79.50    6.94
   5  -7   2   67.11    8.04
  -6   7  -2   57.81    8.36
  -6   7  -2   51.23    5.74
   6  -7   2   79.54    8.55
  -6  -7  -2   68.31    8.27
  -6  -7  -2   47.79    8.46
   6  -7   2   86.80    9.24
  -6   7  -2   53.32    8.20
  -6  -7  -2   59.66    8.00
   6  -7   2   80.38    8.56
  -6  -7  -2   63.77    9.57
  -6   7  -2   67.70    8.94
  -6   7  -2   68.38    5.89
   6   7   2   60.11    7.70
   6  -7   2   72.20    7.02
   6  -7   2   73.57    9.10
   7   7   2   47.69    6.98
  -7   7  -2   58.28    8.77
  -7   7  -2   40.95    4.95
  -7  -7  -2   54.87    7.77
   7  -7   2   61.13    6.55
  -7   7  -2   60.72    8.90
  -7  -7  -2   57.76    7.74
  -7   7  -2   32.65    7.15
   7  -7   2   55.26    7.81
  -7  -7  -2   44.36    8.26
   7  -7   2   60.49    7.97
   7  -7   2   39.80    7.84
  -7  -7  -2   48.42    8.78
   7  -7   2   46.97    7.62
  -8  -7  -2   63.63   10.08
   8   7   2   87.01    8.89
   8  -7   2   87.21   10.00
  -8   7  -2   82.55    6.50
  -8  -7  -2  101.38   10.13
  -8   7  -2   87.77   10.80
  -8   7  -2   87.66   10.79
  -8   7  -2   88.80   10.86
  -8  -7  -2   93.37   11.70
  -8  -7  -2   81.46    9.67
   8  -7   2   75.80   10.67
   8  -7   2   84.09    9.73
   8  -7   2   93.81   10.00
  -9  -7  -2    4.42    3.97
  -9  -7  -2    2.62    3.86
  -9   7  -2    5.15    1.95
   9  -7   2    3.15    4.21
  -9   7  -2   -1.83    3.85
   9  -7   2    5.36    4.59
  -9   7  -2    5.27    4.71
   9  -7   2   12.03    5.62
   9   7   2    1.92    3.89
   9  -7   2    3.86    4.99
  -9  -7  -2   -0.15    4.60
  -9   7  -2    5.15    4.63
  -9  -7  -2    1.44    4.88
  10  -7   2    1.77    4.48
 -10  -7  -2    2.66    5.37
 -10   7  -2    4.98    4.97
 -10  -7  -2    3.53    4.15
  10   7   2    1.66    3.71
 -10   7  -2    7.16    5.40
 -10   7  -2   -0.44    5.07
 -10  -7  -2    8.23    5.69
  10  -7   2    4.71    5.10
 -11  -7  -2    7.18    5.84
  11  -7   2    8.94    6.38
 -11   7  -2    3.14    5.45
  11   7   2    1.88    4.32
 -11  -7  -2    3.14    5.34
  11  -7   2    6.68    4.86
 -11  -7  -2    5.63    5.50
  11   7   2    5.37    4.27
 -11   7  -2    7.83    6.13
 -11   7  -2    7.45    5.91
 -12  -7  -2   13.81    7.85
  12  -7   2   12.70    7.34
 -12   7  -2   32.94    8.42
  12   7   2   38.11    7.79
  12   7   2   21.45    5.55
 -12  -7  -2   10.02    6.73
 -12  -7  -2   20.57    6.49
 -12   7  -2   23.68    7.51
  12  -7   2   28.43    7.37
 -12   7  -2   32.16    8.53
  13   7   2   -1.76    4.00
 -13   7  -2   -0.82    6.24
 -13   7  -2    9.68    6.80
 -13  -7  -2    2.03    4.61
 -13  -7  -2    2.68    6.23
  13   7   2    1.62    5.02
  13  -7   2   -1.97    5.04
 -13   7  -2    6.13    6.35
  14  -8  -2   -2.72    5.68
 -14   8   2    2.41    5.89
  14  -8  -2   -0.05    6.73
 -14   8   2    1.65    5.78
 -14  -8   2    3.49    6.49
 -14   8   2    3.12    5.96
 -13   8   2   12.97    6.81
 -13  -8   2   16.72    7.26
  13   8  -2   16.86    7.03
  13  -8  -2   13.05    6.78
  13  -8  -2   24.01    7.38
  13  -8  -2   27.94    8.61
 -13   8   2   13.77    7.37
 -13   8   2   12.05    7.18
  13   8  -2   10.90    5.38
 -13   8   2   29.94    9.01
  12   8  -2   16.40    6.72
  12   8  -2   21.91    6.09
 -12  -8   2   14.66    7.21
 -12  -8   2   18.23    7.24
 -12  -8   2   14.97    5.77
 -12   8   2   14.89    6.42
  12  -8  -2   10.48    6.27
 -12   8   2   19.10    7.40
  12  -8  -2   12.40    7.00
  12  -8  -2   30.80    8.69
 -12   8   2   11.55    7.03
 -12   8   2   13.84    3.28
 -11   8   2   27.32    7.22
  11  -8  -2   20.66    7.44
 -11  -8   2   23.78    7.51
 -11  -8   2   18.85    7.29
  11   8  -2   19.83    6.64
  11  -8  -2   26.12    7.81
 -11   8   2   15.78    6.72
 -11   8   2   23.89    4.05
 -11   8   2   39.47    8.75
  11  -8  -2   22.10    6.82
 -11   8   2   15.57    6.77
 -11  -8   2   10.02    4.97
  11   8  -2   33.73    6.76
 -10  -8   2    1.21    3.90
 -10  -8   2    1.20    4.68
 -10   8   2    6.75    5.47
 -10   8   2    7.09    5.52
  10  -8  -2   -2.47    4.48
 -10   8   2    2.77    4.31
  10  -8  -2    2.89    5.04
 -10   8   2    1.93    2.08
  10   8  -2   -2.44    4.24
  10  -8  -2    1.53    4.16
 -10  -8   2   -0.87    4.86
  10  -8  -2    3.57    4.31
  10   8  -2   -1.04    3.17
 -10   8   2    4.75    5.15
  -9  -8   2   -2.50    3.32
   9  -8  -2   -2.52    3.74
   9   8  -2    3.37    4.59
   9  -8  -2    0.05    4.60
   9  -8  -2    0.61    3.76
   9   8  -2    2.22    3.35
   9  -8  -2   -4.49    3.98
  -9  -8   2    1.00    3.40
  -9  -8   2   -3.94    4.04
  -9   8   2    2.57    3.82
  -9  -8   2   -0.45    4.28
  -9   8   2    5.48    4.59
  -9   8   2    2.02    4.37
  -9   8   2   -0.97    1.64
  -9   8   2    4.33    2.90
  -8  -8   2    1.30    3.85
   8  -8  -2   -2.91    3.76
   8  -8  -2    7.98    5.14
  -8  -8   2    1.72    3.27
   8   8  -2   12.17    4.33
  -8  -8   2   -2.65    2.54
  -8   8   2    2.59    4.26
   8  -8  -2    1.22    3.74
  -8   8   2   -0.77    3.67
  -8   8   2    4.76    2.48
  -8  -8   2    1.81    2.84
   8  -8  -2    1.69    3.33
   8  -8  -2    0.10    3.64
  -8  -8   2    3.34    4.76
  -8  -8   2   -3.24    4.02
   8   8  -2   -3.60    3.58
  -8   8   2    2.00    3.89
  -8   8   2    1.01    2.97
  -7   8   2   -3.33    3.76
   7   8  -2    0.95    3.98
  -7   8   2   -2.05    1.37
  -7   8   2    0.10    3.10
   7  -8  -2    2.11    4.58
   7  -8  -2   -3.53    3.20
   7   8  -2    3.65    3.34
  -7  -8   2    5.53    3.30
   7  -8  -2   -3.98    2.94
  -7  -8   2    2.52    4.07
  -7  -8   2    0.65    3.20
   7  -8  -2    2.45    3.86
   7  -8  -2    1.72    3.49
  -7   8   2   -1.25    3.81
   7  -8  -2    1.72    3.62
  -7  -8   2    6.27    3.34
  -7  -8   2   -3.07    3.77
  -7   8   2   -3.44    2.99
  -7  -8   2    5.54    3.04
   6  -8  -2   34.27    7.32
   6  -8  -2   39.05    6.78
   6  -8  -2   33.31    6.79
  -6   8   2   43.87    5.43
  -6  -8   2   52.28    9.07
  -6  -8   2   36.23    5.17
   6   8  -2   36.45    6.18
   6  -8  -2   26.12    5.15
   6  -8  -2   33.23    6.83
  -6   8   2   26.78    5.74
  -6   8   2   41.10    6.68
  -6   8   2   27.62    5.71
   6  -8  -2   30.38    5.96
  -6   8   2   45.37    6.92
  -6  -8   2   36.55    5.27
  -6  -8   2   42.32    5.40
  -6  -8   2   32.08    6.12
  -6  -8   2   55.46    8.68
   6   8  -2   39.69    7.71
  -5  -8   2   21.71    6.63
  -5  -8   2   20.54    4.00
   5   8  -2   14.67    4.52
  -5  -8   2   25.81    4.24
   5  -8  -2   18.18    5.78
   5  -8  -2   22.73    4.46
   5   8  -2   28.54    7.07
   5  -8  -2   22.40    4.89
   5  -8  -2   29.07    5.99
  -5  -8   2   30.56    5.71
   5  -8  -2   32.88    7.00
  -5   8   2   26.76    5.58
  -5  -8   2   21.08    4.16
  -5  -8   2   25.60    2.45
  -5  -8   2   25.49    6.39
  -5   8   2   29.26    5.38
  -5   8   2   26.05    4.52
  -4  -8   2  140.13   13.34
   4  -8  -2  168.07   10.51
   4  -8  -2  161.96   13.00
   4  -8  -2  166.85   10.43
   4  -8  -2  169.90   11.25
  -4   8   2  146.58   11.42
  -4  -8   2  165.58    9.24
  -4  -8   2  158.99   10.27
   4  -8  -2  148.96   11.87
   4   8  -2  186.41   14.57
  -4   8   2  153.72   14.98
  -4  -8   2  160.24   10.54
  -4  -8   2  121.17   11.42
   4   8  -2  165.40   11.70
  -4  -8   2  157.63   13.93
  -4   8   2  173.42   11.39
  -4   8   2  168.15   10.91
  -4  -8   2  156.29   10.18
  -4   8   2  156.35   10.16
   4  -8  -2  151.14   12.37
  -3  -8   2   21.91    3.94
   3  -8  -2   26.07    5.12
  -3   8   2   27.39    4.52
   3  -8  -2   18.50    3.89
  -3   8   2   22.09    6.80
  -3   8   2   26.84    5.63
  -3   8   2   29.65    4.26
   3   8  -2   22.29    5.11
   3   8  -2   21.65    6.18
  -3  -8   2   13.22    3.53
  -3   8   2   23.78    4.37
  -3  -8   2   24.64    6.14
  -3  -8   2   29.30    4.05
  -3  -8   2   25.64    4.24
   3   8  -2   14.58    3.96
  -3  -8   2   33.63    6.92
   3  -8  -2   27.25    6.60
   3  -8  -2   17.78    5.12
   2  -8  -2   47.83    6.44
  -2  -8   2   41.95    3.95
  -2  -8   2   61.05    5.86
   2   8  -2   47.92    5.94
   2  -8  -2   48.01    7.50
   2  -8  -2   40.79    5.65
  -2   8   2   12.17    5.08
  -2  -8   2   36.47    4.98
  -2   8   2   37.66    4.90
  -2  -8   2   50.91    5.46
  -2   8   2   51.86    6.80
   2  -8  -2   43.08    4.66
  -2  -8   2   42.11    5.30
  -2   8   2   39.37    5.10
  -2  -8   2   32.00    6.91
   2   8  -2   37.93    7.68
   2   8  -2   50.25    5.94
   2   8  -2   49.58    6.56
   2  -8  -2   38.23    6.94
  -2  -8   2   50.35    7.71
  -1  -8   2   12.82    4.61
  -1  -8   2    3.63    2.45
   1  -8  -2    7.34    2.62
   1   8  -2   10.98    4.18
  -1   8   2    6.96    2.92
   1   8  -2    3.60    4.38
  -1  -8   2    9.08    3.32
   1  -8  -2    8.41    4.43
  -1  -8   2    9.47    3.95
   1  -8  -2    5.42    4.11
  -1  -8   2    7.42    3.14
   1  -8  -2    4.06    2.59
   1  -8  -2    8.77    3.48
   1   8  -2    8.72    3.17
  -1   8   2    7.29    3.00
  -1   8   2    5.82    3.87
  -1  -8   2   13.02    3.69
   1   8  -2    5.67    2.79
  -1   8   2    3.53    4.12
  -1  -8   2   14.12    3.64
   1   8  -2    6.96    2.97
   0   8   2    6.36    3.00
   0   8  -2    4.15    2.47
   0  -8   2    3.02    2.91
   0   8   2    0.21    3.47
   0  -8   2    6.47    3.17
   0  -8   2    7.90    2.83
   0  -8  -2    2.78    2.21
   0   8  -2    5.16    2.60
   0  -8   2    6.32    3.25
   0   8  -2    3.97    4.30
   0   8  -2    7.70    3.87
   0  -8  -2    0.42    3.50
   0  -8   2    6.79    4.08
   0  -8   2    5.56    3.15
   0  -8  -2    3.72    3.87
   0   8   2    9.23    4.28
   0  -8  -2    1.49    3.02
   0   8  -2    5.97    2.88
   0  -8  -2    3.66    1.90
   0  -8   2    2.81    3.85
  -1  -8  -2    4.43    2.23
  -1   8  -2    4.21    2.46
  -1   8  -2    4.35    4.64
   1  -8   2    8.29    3.20
   1   8   2    4.91    3.89
   1  -8   2    5.10    2.86
  -1   8  -2    0.49    3.23
   1  -8   2    5.43    2.93
   1  -8   2    0.06    2.54
  -1  -8  -2    1.31    2.97
  -1   8  -2   -0.47    1.94
   1   8   2    7.60    4.38
  -1  -8  -2    1.47    3.72
   1  -8   2    9.71    4.50
   1  -8   2    5.05    3.10
  -1   8  -2    2.94    2.62
   1  -8   2    0.13    3.22
  -1  -8  -2    0.54    3.24
   2  -8   2    4.04    3.70
   2   8   2    0.61    3.70
  -2   8  -2   -0.33    1.93
  -2   8  -2    1.47    2.24
  -2  -8  -2    3.10    1.74
  -2   8  -2    0.46    1.95
   2  -8   2    1.70    3.24
   2  -8   2    6.54    3.45
   2  -8   2    0.58    2.60
  -2  -8  -2   -0.14    3.21
  -2  -8  -2    8.53    3.71
  -2   8  -2   -1.05    3.00
   2  -8   2   -2.17    2.65
   2  -8   2    0.88    3.19
   2  -8   2    0.55    3.19
  -2   8  -2    4.21    4.46
  -2  -8  -2   -0.67    3.13
   2  -8   2    0.14    3.18
   3   8   2  104.96   11.22
   3  -8   2  117.30   10.41
   3  -8   2  110.24   10.43
   3  -8   2  108.53   10.04
   3  -8   2  113.46   10.78
  -3   8  -2  116.16    9.29
  -3  -8  -2  100.88    9.79
  -3   8  -2  113.36    8.37
   3  -8   2  103.27   10.35
  -3  -8  -2   98.89    9.89
   3  -8   2  121.16    8.50
  -3   8  -2  111.90    9.91
  -3  -8  -2  100.95   11.18
  -3  -8  -2  122.17   12.20
  -3   8  -2  104.88    8.99
  -3   8  -2  109.83    8.38
   3  -8   2  124.45   10.98
   3  -8   2  148.38   10.65
   4  -8   2   87.15    9.41
   4  -8   2   58.21    6.39
  -4   8  -2   56.28    6.50
  -4   8  -2   61.74    6.16
  -4  -8  -2   48.33    7.27
   4  -8   2   61.43    8.11
  -4   8  -2   54.75    7.50
   4  -8   2   66.32    8.39
   4  -8   2   53.36    7.90
   4  -8   2   63.75    8.31
  -4  -8  -2   42.41    6.83
  -4   8  -2   70.66    7.24
   4  -8   2   67.13    8.47
   4  -8   2   47.95    7.61
  -4  -8  -2   65.91    9.42
   4   8   2   64.84    8.84
  -4  -8  -2   45.40    8.22
   5   8   2   32.98    6.74
   5  -8   2   24.97    6.33
  -5  -8  -2   27.07    5.67
   5  -8   2   28.33    6.06
   5  -8   2   30.44    6.74
  -5   8  -2   26.36    4.96
  -5  -8  -2   31.33    7.43
  -5  -8  -2   24.83    5.73
   5  -8   2   29.75    4.96
   5  -8   2   31.80    6.63
  -5  -8  -2   30.46    7.32
  -5   8  -2   35.03    6.95
  -5   8  -2   26.59    4.63
  -6  -8  -2   31.01    6.45
   6  -8   2   31.95    6.97
   6  -8   2   49.56    7.60
   6   8   2   45.56    7.79
  -6  -8  -2   29.69    7.58
  -6  -8  -2   32.16    7.77
   6  -8   2   42.84    6.17
  -6   8  -2   30.64    6.67
  -6   8  -2   41.81    5.56
  -6   8  -2   43.49    5.54
  -6   8  -2   40.51    7.63
   6  -8   2   48.35    7.92
   6  -8   2   49.79    8.08
  -6   8  -2   50.82    8.02
   7  -8   2   39.28    7.43
  -7   8  -2   34.30    5.06
   7  -8   2   40.28    7.42
  -7  -8  -2   55.27    9.39
  -7  -8  -2   35.93    8.44
  -7   8  -2   40.83    8.02
   7  -8   2   37.11    7.98
  -7  -8  -2   34.53    6.79
   7  -8   2   34.22    5.94
   7   8   2   32.00    6.84
  -7   8  -2   32.18    7.49
   7  -8   2   54.85    8.22
  -7   8  -2   23.31    6.91
  -7   8  -2   41.16    4.37
  -8   8  -2   -0.09    1.93
  -8  -8  -2    0.49    4.27
   8  -8   2    4.61    4.58
   8  -8   2   -2.58    4.10
  -8  -8  -2    9.62    5.26
   8  -8   2   -1.53    4.22
  -8  -8  -2    3.57    4.06
   8   8   2    2.86    4.05
  -8   8  -2    2.04    4.48
  -8   8  -2    0.11    4.27
  -8   8  -2   -1.67    4.03
   8  -8   2    0.37    4.59
  -9   8  -2  102.98    7.31
   9   8   2   98.71   10.53
   9   8   2   97.31   10.91
  -9  -8  -2   86.18   11.91
   9  -8   2  120.07   13.37
  -9   8  -2   81.35   11.52
   9  -8   2   93.28   11.28
  -9  -8  -2   71.76   10.24
  -9   8  -2   99.32   12.15
  -9   8  -2   77.35   11.28
  -9  -8  -2   82.17   12.09
 -10   8  -2    3.14    5.20
  10   8   2    5.52    4.99
 -10   8  -2   -1.81    5.03
 -10  -8  -2    7.51    5.32
 -10   8  -2    2.81    1.91
 -10   8  -2    3.56    5.20
  10   8   2    2.07    4.13
  10  -8   2    2.05    5.25
  10  -8   2   -1.43    4.99
 -10  -8  -2    7.44    6.45
 -10  -8  -2    1.73    5.28
 -11  -8  -2    9.01    5.25
 -11  -8  -2    3.92    5.80
  11   8   2    6.34    4.58
  11  -8   2    6.17    5.81
 -11  -8  -2    4.21    6.20
  11   8   2    9.74    5.41
  11  -8   2    6.98    5.32
 -11   8  -2    2.00    5.42
 -11   8  -2    6.83    5.36
 -11   8  -2   12.13    6.20
 -12   8  -2   12.65    6.95
 -12  -8  -2    3.71    5.12
 -12   8  -2   14.23    7.24
 -12  -8  -2    4.99    6.94
  12   8   2   11.83    6.21
 -12   8  -2   13.51    7.75
  12  -8   2    4.25    5.57
  12   8   2    8.36    5.24
 -13   9   2    3.67    6.10
 -13  -9   2   -4.90    6.82
 -13   9   2   -3.91    5.87
  13  -9  -2    2.96    6.77
 -13   9   2    1.00    2.28
 -13   9   2   -1.45    5.97
  12  -9  -2    5.59    7.01
  12   9  -2   18.03    6.31
 -12   9   2   21.69    7.96
  12  -9  -2    9.44    7.10
 -12   9   2   17.05    7.57
 -12   9   2    6.09    6.29
  12   9  -2   14.79    7.32
  12  -9  -2   20.90    8.53
 -12   9   2    9.12    3.31
 -12  -9   2   10.04    7.34
 -11   9   2    0.67    5.70
  11   9  -2    5.88    4.99
  11   9  -2    0.32    5.25
  11  -9  -2   -1.46    5.24
  11  -9  -2   -5.93    5.16
 -11  -9   2   10.84    7.04
 -11   9   2    0.02    5.20
 -11   9   2    0.18    2.39
 -11   9   2   -4.28    4.45
 -11  -9   2    5.95    6.41
 -11  -9   2   -3.45    4.26
  11  -9  -2   -2.35    5.32
  10  -9  -2   12.35    6.91
 -10  -9   2    6.36    6.18
  10  -9  -2    2.05    5.13
  10  -9  -2    1.33    4.78
 -10  -9   2    3.82    5.81
  10   9  -2    0.54    4.91
 -10   9   2   -0.36    4.47
  10   9  -2   14.29    5.28
 -10   9   2   14.36    6.01
 -10   9   2    5.71    5.48
 -10  -9   2   11.50    5.19
 -10   9   2    4.79    2.87
   9  -9  -2    6.38    5.38
   9  -9  -2   14.17    5.04
   9   9  -2   11.75    5.00
  -9  -9   2    3.83    4.09
   9  -9  -2   16.52    6.60
  -9   9   2   13.82    4.28
   9   9  -2   15.46    6.53
  -9   9   2    4.86    5.20
  -9  -9   2   11.58    6.25
  -9   9   2    4.66    2.66
  -9  -9   2    4.09    5.42
   8   9  -2   -0.12    4.10
  -8   9   2    4.12    3.71
  -8   9   2    0.36    3.72
  -8  -9   2   -0.20    3.47
   8  -9  -2   -3.45    3.75
  -8  -9   2    3.68    5.09
   8  -9  -2    0.41    4.15
   8  -9  -2    0.79    4.62
  -8  -9   2    2.06    4.77
   8   9  -2   -2.76    2.76
  -8   9   2    1.09    2.28
   7  -9  -2    6.47    5.22
  -7   9   2    9.52    3.54
  -7  -9   2    6.04    4.02
   7   9  -2    9.09    4.37
  -7   9   2   13.42    5.23
   7  -9  -2    0.37    4.00
  -7  -9   2   10.37    5.89
  -7  -9   2   18.76    7.04
  -7   9   2   14.68    4.89
   7  -9  -2    8.40    4.41
   7  -9  -2    5.93    5.05
   7   9  -2    1.41    4.84
   6  -9  -2  136.84    9.99
   6  -9  -2  139.09   13.32
   6   9  -2  119.10   13.51
   6  -9  -2  140.74   12.62
  -6   9   2  151.73   11.62
  -6   9   2  128.98    9.79
   6   9  -2  107.03   10.70
  -6  -9   2  118.22   13.64
   6  -9  -2  108.75   12.32
  -6  -9   2  133.94   13.46
  -6   9   2  131.94   10.90
  -6  -9   2   90.15   10.65
  -5   9   2   36.23    6.93
   5  -9  -2   40.31    8.34
   5  -9  -2   45.07    8.27
   5   9  -2   33.91    6.05
   5  -9  -2   23.80    4.82
  -5   9   2   44.16    6.01
  -5  -9   2   25.01    7.47
   5   9  -2   30.72    7.98
  -5  -9   2   37.53    8.07
  -5   9   2   38.15    6.34
   5  -9  -2   33.30    6.78
  -5  -9   2   34.36    3.01
   4  -9  -2  121.98   12.51
  -4  -9   2  116.92    8.72
  -4   9   2  119.45    9.28
   4   9  -2  123.62   13.41
  -4  -9   2  107.35    7.34
  -4  -9   2  106.90   12.26
  -4  -9   2   97.57   11.97
  -4   9   2  111.30    8.60
   4  -9  -2  102.44    8.51
  -4   9   2  118.17   10.86
   4   9  -2  126.75   10.12
   4  -9  -2  119.33   11.04
   4  -9  -2  116.90   12.07
   3  -9  -2    6.61    4.30
   3  -9  -2    2.37    3.16
  -3  -9   2   12.10    5.55
   3   9  -2    7.08    3.28
  -3  -9   2   11.60    3.42
  -3   9   2   12.15    3.88
   3  -9  -2   13.31    5.24
   3   9  -2   10.89    5.74
  -3   9   2   10.68    6.12
  -3  -9   2   11.15    5.47
  -3   9   2    6.44    2.97
   3  -9  -2    4.68    3.66
  -3  -9   2    8.71    3.01
  -3   9   2    7.23    4.70
   3   9  -2   17.91    5.20
   3  -9  -2   13.56    3.76
   3   9  -2    5.83    3.52
  -2  -9   2   45.69    5.48
   2  -9  -2   32.48    7.19
  -2  -9   2   41.72    5.47
  -2  -9   2   37.17    5.18
   2  -9  -2   36.44    5.95
  -2   9   2   39.34    6.78
   2  -9  -2   40.13    5.97
   2  -9  -2   45.63    4.98
  -2   9   2   38.85    5.67
   2   9  -2   38.25    6.07
   2   9  -2   35.62    6.50
   2  -9  -2   43.92    7.92
   2   9  -2   35.36    8.04
  -2  -9   2   33.56    5.02
  -2   9   2   43.99    5.54
  -2  -9   2   40.61    7.86
   2   9  -2   40.53    5.81
  -2  -9   2   38.36    3.97
  -2  -9   2   38.84    7.54
  -1  -9   2    0.43    3.66
  -1   9   2    0.65    2.15
  -1  -9   2   -0.26    2.66
  -1  -9   2    3.36    3.01
   1   9  -2    0.77    3.82
   1  -9  -2    1.49    3.94
   1   9  -2    0.16    2.26
  -1   9   2    0.37    4.25
   1   9  -2    1.59    4.18
  -1   9   2    3.91    4.12
  -1  -9   2    2.37    2.44
   1   9  -2    1.21    2.58
  -1  -9   2    1.49    4.18
  -1  -9   2    0.83    3.08
   1  -9  -2    6.41    4.17
  -1  -9   2   -1.32    2.32
   1  -9  -2   -3.19    2.19
   1  -9  -2    0.32    2.29
   1  -9  -2    1.45    3.09
   0  -9   2   24.64    4.96
   0  -9  -2   14.40    5.40
   0  -9   2   19.23    4.52
   0   9  -2   14.46    5.33
   0  -9   2   24.01    5.25
   0  -9   2   26.05    6.26
   0   9  -2   24.90    4.78
   0  -9   2   19.77    6.29
   0   9   2   12.38    3.79
   0   9  -2   14.58    4.01
   0   9  -2   26.47    7.50
   0   9   2   18.57    6.22
   0  -9  -2   24.20    6.57
   0  -9   2   18.47    4.50
   0  -9   2   18.01    3.48
   0  -9  -2   19.00    2.68
   0  -9  -2   10.33    3.38
   0  -9  -2   16.20    4.62
   0   9   2   20.29    5.51
  -1  -9  -2    6.07    2.57
   1  -9   2    5.20    3.46
  -1   9  -2    2.06    2.67
   1  -9   2    7.56    4.01
  -1   9  -2    5.85    4.07
  -1  -9  -2   -3.55    3.66
  -1  -9  -2    7.46    4.62
   1  -9   2    9.89    4.97
  -1   9  -2    6.06    3.31
  -1   9  -2    9.86    6.13
   1  -9   2    6.31    3.78
   1  -9   2    9.30    3.66
   1  -9   2    5.91    4.47
   1   9   2    5.61    3.27
  -1  -9  -2    4.21    3.28
   1   9   2   -1.98    4.11
  -1   9  -2    4.29    2.95
   1  -9   2    2.07    2.89
  -2   9  -2    3.68    2.81
   2   9   2    9.15    5.50
  -2  -9  -2    3.37    4.07
   2  -9   2    6.93    4.03
   2  -9   2    9.16    4.08
  -2  -9  -2    3.95    3.68
   2  -9   2    8.08    3.44
  -2  -9  -2    6.84    2.18
   2  -9   2    8.29    4.25
  -2   9  -2    5.93    3.14
  -2   9  -2   10.42    4.66
   2  -9   2    7.98    4.41
   2  -9   2   11.71    4.32
  -2  -9  -2    7.90    5.10
   2  -9   2    8.24    4.95
  -2   9  -2    9.24    3.46
   2   9   2    9.20    3.68
   3  -9   2   -5.71    2.51
  -3   9  -2   -0.32    2.66
  -3   9  -2   -1.35    2.30
   3   9   2   -0.65    3.72
  -3   9  -2    2.36    4.08
   3  -9   2    0.72    3.65
   3  -9   2   20.43    6.08
   3   9   2    2.96    2.80
  -3   9  -2    4.25    3.02
   3  -9   2    1.30    3.54
   3  -9   2   -0.74    3.39
  -3  -9  -2    8.19    4.17
  -3  -9  -2   -3.41    3.76
   3  -9   2   10.67    4.52
   3  -9   2    1.59    3.76
  -3  -9  -2    7.73    4.99
   4  -9   2   16.46    5.29
  -4   9  -2   25.70    5.67
   4  -9   2   10.70    4.24
  -4  -9  -2   20.55    5.28
   4   9   2   19.94    5.13
  -4  -9  -2   14.48    5.85
  -4  -9  -2   23.41    6.75
   4   9   2   13.31    5.85
   4  -9   2   30.47    6.74
   4  -9   2   14.66    5.28
  -4   9  -2    7.64    3.50
   4  -9   2   16.90    5.44
   4  -9   2   29.05    6.63
   4  -9   2   21.52    5.93
  -5  -9  -2   22.09    6.80
  -5   9  -2   21.85    6.03
  -5  -9  -2   29.25    7.39
   5  -9   2   16.70    6.04
  -5   9  -2   17.40    4.46
   5   9   2   24.89    5.91
  -5  -9  -2   17.81    5.54
   5  -9   2   20.98    6.34
  -5   9  -2   29.36    5.52
   5  -9   2   29.18    6.51
   5  -9   2   28.43    6.84
   5  -9   2   21.54    5.21
   5  -9   2   33.52    7.37
   5  -9   2   22.88    6.68
   5   9   2   28.29    7.27
  -6   9  -2    7.89    3.41
  -6   9  -2   11.86    4.34
   6  -9   2    8.21    5.04
   6  -9   2    4.33    3.86
  -6   9  -2   11.47    5.48
   6  -9   2   25.59    7.22
   6   9   2    3.93    4.95
   6  -9   2    2.02    3.84
   6   9   2    6.60    4.57
  -6  -9  -2    1.03    4.76
  -6  -9  -2   14.27    6.18
  -6  -9  -2    7.37    4.29
   6  -9   2    1.96    4.34
  -7   9  -2    5.71    4.65
   7  -9   2    1.90    5.01
  -7   9  -2    4.30    5.40
   7   9   2    8.67    4.62
  -7  -9  -2   -4.12    4.34
   7   9   2    5.80    5.28
  -7  -9  -2   -1.80    5.17
  -7  -9  -2    0.56    3.59
   7  -9   2    2.98    4.88
   7  -9   2    0.06    3.76
  -7   9  -2    0.60    3.08
   7  -9   2    7.89    5.42
   7  -9   2    8.68    5.19
  -7   9  -2    2.39    4.16
  -7   9  -2   -0.55    1.92
  -8   9  -2   25.38    7.27
  -8  -9  -2   14.75    6.77
   8   9   2    9.49    5.54
  -8  -9  -2   19.53    6.15
   8  -9   2   21.67    6.90
  -8   9  -2   16.57    4.05
  -8  -9  -2   22.86    7.68
   8   9   2   21.00    6.57
  -8   9  -2   15.72    6.12
   8  -9   2    8.09    5.51
   8  -9   2   16.47    5.90
   8  -9   2   19.56    6.58
  -8   9  -2   21.17    7.24
   9   9   2    7.15    5.38
  -9  -9  -2    9.06    6.50
  -9   9  -2   15.61    3.69
  -9  -9  -2   11.73    5.64
   9   9   2    9.25    5.25
   9  -9   2   23.29    7.87
  -9   9  -2   11.41    6.15
  -9   9  -2   23.09    7.10
  -9   9  -2   25.44    6.95
   9  -9   2   19.41    7.08
  -9  -9  -2   14.03    7.15
 -10  -9  -2   40.86    9.96
 -10   9  -2   22.58    3.83
 -10   9  -2   44.88    9.95
 -10   9  -2   23.86    7.84
  10   9   2   32.50    7.77
  10   9   2   39.36    8.31
  10  -9   2   36.59    9.21
 -10  -9  -2   22.41    6.41
  10  -9   2   25.84    7.94
 -10   9  -2   26.92    8.43
 -10  -9  -2   45.66   10.02
 -11   9  -2   13.30    6.76
 -11  -9  -2    4.65    6.34
 -11   9  -2    7.79    6.21
  11  -9   2    7.20    6.88
 -11  -9  -2    5.07    5.10
 -11   9  -2    8.23    6.59
  11  -9   2    0.49    5.64
  11   9   2    5.00    5.60
  11 -10  -2    9.65    7.49
 -11  10   2   33.98    8.79
  11 -10  -2   12.45    7.87
  11 -10  -2   17.22    6.75
 -11  10   2   15.45    4.32
 -11 -10   2   24.48    8.82
 -10  10   2    0.90    5.49
  10 -10  -2    6.04    6.50
  10  10  -2    3.82    5.06
  10  10  -2   17.81    7.88
  10 -10  -2   -3.12    4.64
 -10  10   2    0.26    2.15
  10 -10  -2    2.19    6.19
 -10 -10   2   -6.36    5.43
   9  10  -2    6.96    4.91
   9 -10  -2    2.43    5.79
  -9  10   2    1.22    3.92
  -9 -10   2    7.23    6.95
  -9  10   2    3.76    5.03
   9 -10  -2    4.91    5.90
  -9  10   2    1.66    2.58
   9  10  -2   10.05    7.24
   9 -10  -2    1.82    4.62
  -9 -10   2   15.20    6.95
   8 -10  -2   -3.84    5.20
   8  10  -2   -0.07    5.92
  -8  10   2    8.55    5.83
  -8 -10   2    2.58    5.80
  -8  10   2    0.53    2.50
   8  10  -2    6.28    4.39
   8 -10  -2    7.96    4.70
  -8  10   2    2.88    4.12
   8 -10  -2    4.42    5.71
  -8 -10   2    5.74    6.31
   7 -10  -2   23.57    7.52
  -7 -10   2   19.94    7.16
   7 -10  -2   25.92    7.28
   7  10  -2    9.05    4.73
  -7  10   2   18.74    5.76
   7  10  -2   11.29    6.44
  -7  10   2   14.23    4.43
   7 -10  -2   14.52    6.70
   7 -10  -2   18.89    5.48
  -7 -10   2   13.60    6.60
   6 -10  -2   -4.21    3.85
  -6 -10   2    4.06    5.26
   6 -10  -2    2.52    3.68
   6  10  -2    2.28    5.13
   6 -10  -2    3.53    4.50
   6 -10  -2    4.67    5.20
   6  10  -2    3.28    3.61
  -6 -10   2    7.82    5.52
  -6  10   2   -1.48    2.13
  -6  10   2    4.70    4.76
  -5  10   2   60.13    7.40
  -5 -10   2   55.13   10.07
  -5 -10   2   54.38   10.06
  -5 -10   2   46.02    3.58
   5  10  -2   56.02   10.81
   5 -10  -2   46.17    9.11
   5 -10  -2   48.16    9.13
  -5  10   2   48.77    8.24
   5 -10  -2   47.76    8.26
   5 -10  -2   40.17    6.21
   5  10  -2   48.89    7.45
  -4  10   2   49.15    6.74
   4  10  -2   44.05    9.99
  -4 -10   2   64.82   10.20
  -4  10   2   43.82    7.85
   4 -10  -2   43.05    8.60
  -4 -10   2   37.30    8.76
   4 -10  -2   42.27    7.42
   4 -10  -2   39.11    5.53
  -4 -10   2   35.29    4.41
   4  10  -2   38.40    6.68
   4 -10  -2   35.92    7.87
   4  10  -2   32.87    6.21
  -3  10   2   10.52    5.69
  -3  10   2    7.66    3.86
   3  10  -2    1.22    2.93
   3  10  -2    1.32    3.23
   3 -10  -2   15.07    4.52
  -3 -10   2    7.17    5.59
   3 -10  -2    2.30    3.65
   3  10  -2    8.17    6.30
  -3 -10   2    4.00    4.95
   3 -10  -2   11.19    5.67
   3 -10  -2   19.66    6.39
  -3 -10   2    9.57    2.95
   3 -10  -2    8.31    3.71
  -3  10   2    3.46    2.67
  -2  10   2   62.36    8.74
   2 -10  -2   58.72    7.64
  -2 -10   2   48.44    6.19
   2  10  -2   44.18    6.80
   2 -10  -2   36.67    8.14
   2 -10  -2   58.88    7.44
  -2 -10   2   68.39   10.25
  -2  10   2   23.55    8.13
  -2  10   2   53.95    6.70
   2  10  -2   49.93    7.14
  -2 -10   2   63.92    9.73
  -2 -10   2   54.45    4.61
   2  10  -2   66.76   11.73
   2 -10  -2   44.61    8.76
   2 -10  -2   54.21    5.65
   2  10  -2   71.72    8.66
   1  10  -2   80.02    8.18
  -1 -10   2   54.94    5.29
   1 -10  -2   41.10    8.73
  -1 -10   2   52.12    6.76
   1  10  -2   29.80    8.86
  -1  10   2   73.04    9.06
  -1  10   2   41.52    6.39
   1 -10  -2   44.40    6.45
   1  10  -2   52.70    7.06
   1  10  -2   69.08    8.92
  -1 -10   2   68.85   10.04
   1 -10  -2   53.03    9.09
  -1  10   2   47.78    9.99
  -1 -10   2   56.23    9.01
   1 -10  -2   53.58    5.11
   1 -10  -2   61.93    7.89
   0 -10  -2    0.89    4.42
   0  10   2    3.69    2.86
   0  10  -2   -1.23    2.67
   0 -10   2   -3.02    3.99
   0  10   2    0.24    4.45
   0 -10   2    3.92    4.40
   0  10   2    1.79    4.77
   0 -10   2    5.95    3.73
   0 -10  -2   -0.82    3.55
   0  10  -2    2.77    2.95
   0  10  -2    0.23    2.48
   0 -10  -2    1.62    2.51
   0  10  -2    4.74    4.86
   0 -10  -2    2.53    4.51
   0 -10   2    7.01    3.19
   1 -10   2   17.80    5.30
   1  10   2   12.92    4.43
  -1 -10  -2    3.24    4.75
  -1  10  -2    7.73    3.62
  -1 -10  -2    7.55    2.87
  -1  10  -2   17.05    4.45
  -1 -10  -2   11.00    4.59
   1 -10   2   13.62    6.11
   1  10   2   15.11    6.69
  -1 -10  -2   15.55    6.28
   1 -10   2    5.09    3.37
   1 -10   2   16.62    5.98
  -1  10  -2    8.95    3.76
  -1  10  -2   13.86    5.87
  -2 -10  -2   67.21   10.24
   2  10   2   81.25    8.72
  -2 -10  -2   52.66    8.09
   2 -10   2   57.01    6.43
   2 -10   2   52.47    9.17
  -2  10  -2   49.39    8.09
  -2  10  -2   47.62    6.51
   2 -10   2   70.94    8.18
   2  10   2   55.45   10.29
  -2  10  -2   69.59    8.03
  -2 -10  -2   56.16    9.97
   2 -10   2   66.59    8.75
   2 -10   2   75.89   10.27
  -2  10  -2   79.51    7.72
  -2 -10  -2   51.13    4.67
  -3  10  -2   -0.87    4.07
   3 -10   2    3.47    3.73
   3 -10   2    6.31    4.07
  -3 -10  -2    0.03    4.16
   3 -10   2    9.77    4.46
  -3  10  -2    3.62    3.36
  -3 -10  -2    4.28    4.00
   3 -10   2    5.86    4.27
   3 -10   2    4.61    4.87
   3  10   2    9.80    5.98
  -3 -10  -2   -0.59    4.15
   3 -10   2    5.77    4.68
   3  10   2    4.58    3.21
   3 -10   2    0.94    3.38
   4  10   2   54.91    7.87
  -4 -10  -2   60.41   10.36
   4 -10   2   53.22    8.82
   4 -10   2   61.58    8.47
  -4  10  -2   45.75    6.91
  -4 -10  -2   39.31    9.10
  -4 -10  -2   24.90    6.38
   4 -10   2   42.18    6.17
   4  10   2   49.16    9.67
   4 -10   2   51.12    8.38
  -4  10  -2   47.66    7.54
   4 -10   2   43.75    7.77
   4 -10   2   58.33    8.40
   4 -10   2   55.25    9.34
  -5 -10  -2  136.28   14.30
   5 -10   2  119.53   11.95
   5  10   2  111.41   13.05
  -5  10  -2  112.63   10.18
   5 -10   2  116.32   12.50
   5 -10   2  115.85   10.12
   5 -10   2  119.64   12.05
  -5  10  -2  100.33   10.06
   5  10   2  120.91   11.67
   5 -10   2  135.49   13.18
  -5 -10  -2  126.36   12.47
   5 -10   2   99.46   12.07
  -5 -10  -2   94.67   13.28
   5 -10   2  124.02   12.32
  -6 -10  -2    0.80    4.07
   6  10   2    7.12    5.51
   6 -10   2    6.43    4.99
   6 -10   2    7.39    5.29
  -6  10  -2    6.94    3.40
   6 -10   2    5.17    5.44
  -6 -10  -2    8.58    5.90
   6 -10   2    6.48    5.02
   6  10   2   10.54    5.11
   6 -10   2   19.55    6.23
  -6 -10  -2    4.72    5.62
  -6  10  -2    4.79    4.10
   6 -10   2    7.59    4.71
   7 -10   2    0.95    4.82
  -7 -10  -2    3.54    5.47
   7  10   2   -2.57    3.80
   7 -10   2    8.26    5.12
   7 -10   2   -3.42    5.18
   7  10   2    2.13    4.86
   7 -10   2    2.86    5.06
  -7  10  -2    4.39    4.17
  -7 -10  -2    7.34    5.93
  -7  10  -2    2.13    2.87
   7 -10   2    4.73    5.27
  -7 -10  -2    2.32    4.33
   8 -10   2   36.82    9.17
   8  10   2   50.35    9.54
  -8  10  -2   29.16    5.29
  -8 -10  -2   31.20    7.45
   8  10   2   49.61    8.70
  -8 -10  -2   54.63   11.05
  -8 -10  -2   42.94   10.01
   8 -10   2   36.34    7.11
  -8  10  -2   38.33    9.40
  -9  10  -2   21.00    7.25
  -9 -10  -2    3.85    4.98
  -9 -10  -2    0.83    6.15
  -9  10  -2   20.54    8.11
   9  10   2   18.39    7.11
   9 -10   2   19.05    7.64
  -9  10  -2   13.38    7.05
  -9  10  -2   15.45    4.07
 -10  10  -2   11.30    6.65
 -10  10  -2    3.57    2.90
 -10 -10  -2   -1.66    4.70
  10 -10   2    1.71    5.66
 -10 -10  -2   14.60    8.01
 -10  10  -2   -0.03    5.48
 -10  10  -2    9.90    7.42
 -10  11   2   -1.36    2.38
 -10 -11   2    5.94    7.48
  10 -11  -2    6.58    6.33
  10 -11  -2   -6.10    6.02
  10  11  -2    4.55    4.59
   9 -11  -2    9.23    5.97
  -9 -11   2    2.01    6.20
   9 -11  -2    3.64    6.91
   9  11  -2    3.28    4.66
   9 -11  -2   -8.49    5.49
   9  11  -2    8.80    7.84
  -9  11   2    2.78    4.53
  -9  11   2   -0.30    3.02
  -8  11   2   -0.13    4.66
   8  11  -2   -5.95    3.28
  -8 -11   2   -0.86    5.97
   8  11  -2   -6.94    5.11
   8 -11  -2    1.64    6.03
   8 -11  -2   -7.77    5.12
  -8 -11   2    5.56    6.90
  -8  11   2    0.43    2.79
   8 -11  -2   -2.18    4.66
   8 -11  -2    1.54    4.55
   7  11  -2   19.09    5.67
   7 -11  -2   30.81    7.54
  -7  11   2   19.15    6.50
  -7 -11   2   27.45    8.51
   7  11  -2   15.31    6.13
   7 -11  -2   30.32    8.95
  -7  11   2   22.03    5.60
   7 -11  -2   24.11    5.94
   7  11  -2   35.46    9.89
   7 -11  -2   10.79    6.76
  -7 -11   2   38.31    9.24
   6 -11  -2    4.43    5.01
  -6  11   2   -1.46    2.96
   6  11  -2    7.43    4.35
  -6  11   2    1.61    5.39
   6  11  -2    1.68    6.51
   6 -11  -2    8.88    4.75
   6  11  -2    3.00    4.03
  -6 -11   2    2.46    5.83
  -6 -11   2   -4.29    5.11
   6 -11  -2    1.43    5.47
   6 -11  -2   -2.14    5.46
  -5  11   2   -0.50    2.81
   5  11  -2    1.84    6.49
   5 -11  -2    4.68    5.97
  -5 -11   2    4.54    5.69
  -5 -11   2   -1.75    5.05
   5  11  -2    5.24    3.80
   5 -11  -2    2.75    4.45
   5  11  -2    0.37    3.29
  -5  11   2    8.07    5.93
   5 -11  -2   -4.64    3.95
   5 -11  -2   -0.21    3.63
  -4  11   2    3.69    5.19
  -4 -11   2    3.40    2.25
  -4  11   2    0.56    2.96
   4 -11  -2   -3.40    4.90
   4  11  -2   10.05    4.34
   4 -11  -2   -2.36    3.66
   4  11  -2    1.37    6.13
   4 -11  -2    4.60    3.85
  -4 -11   2   -1.21    5.03
   4  11  -2    7.30    4.23
  -4 -11   2    1.71    5.00
   4 -11  -2    4.27    5.72
  -3 -11   2    5.19    5.34
   3  11  -2   -1.92    2.99
   3  11  -2    3.36    3.47
   3 -11  -2   -3.17    2.86
  -3 -11   2    0.28    2.36
   3  11  -2   -2.51    5.41
   3 -11  -2   -2.49    4.55
   3 -11  -2   -5.46    4.09
   3 -11  -2   -1.32    3.21
  -3  11   2    1.35    6.00
  -3 -11   2   -4.07    4.81
   2 -11  -2    8.86    5.29
   2  11  -2   10.09    6.51
  -2 -11   2    4.24    5.24
   2 -11  -2   10.67    4.87
   2  11  -2   -1.56    2.10
  -2  11   2   -2.36    2.72
  -2 -11   2   -1.70    2.54
   2 -11  -2    2.00    4.94
   2 -11  -2   -0.60    2.87
  -2  11   2   -5.56    4.68
   2  11  -2    0.02    5.89
   2  11  -2   -0.24    3.37
  -2 -11   2    0.91    5.21
   2 -11  -2    0.22    3.01
   1 -11  -2    0.94    3.71
   1  11  -2   -1.43    2.93
   1  11  -2    6.31    5.51
   1 -11  -2    0.81    5.05
  -1  11   2    2.47    6.75
  -1 -11   2   14.22    6.33
  -1 -11   2   -0.68    2.73
   1 -11  -2    1.42    2.56
   1 -11  -2    2.56    4.74
  -1  11   2    3.62    3.12
   1 -11  -2    5.80    3.38
   1  11  -2    1.12    3.10
  -1 -11   2   -0.55    2.66
  -1 -11   2    6.24    5.36
  -1  11   2   -0.22    5.35
   0  11   2   25.21    5.84
   0 -11   2   45.39    9.45
   0  11  -2   49.34    8.78
   0  11  -2   31.05    6.00
   0 -11  -2   33.65    8.44
   0 -11  -2   30.91    5.33
   0 -11   2   45.98    8.89
   0 -11   2   33.01    6.34
   0 -11  -2   18.50    6.98
   0 -11  -2   34.04    6.69
   0  11   2   34.43    9.65
   0  11  -2   37.35    6.60
   0 -11   2   32.53    4.77
  -1  11  -2   38.22    6.18
  -1  11  -2   35.28    6.29
   1  11   2   17.92    7.37
  -1 -11  -2   27.51    4.47
  -1 -11  -2   24.72    7.25
   1 -11   2   37.60    8.46
  -1 -11  -2   34.29    8.41
  -1 -11  -2   44.08    7.81
  -1  11  -2   35.00    6.87
   1 -11   2   44.67    8.92
   1 -11   2   26.44    6.26
   1  11   2   33.77    6.52
   1 -11   2   25.63    4.92
  -1  11  -2   42.02    8.39
   2 -11   2   -1.65    3.23
   2 -11   2   -0.47    3.45
  -2  11  -2    2.31    3.99
  -2 -11  -2    5.89    4.63
  -2  11  -2    4.64    5.36
  -2  11  -2    1.06    2.69
   2  11   2    4.33    3.73
  -2  11  -2    3.14    3.48
   2 -11   2    9.46    6.25
   2  11   2    0.82    5.72
  -2 -11  -2    0.26    1.65
  -2 -11  -2    4.42    5.17
   2 -11   2    6.55    5.41
  -2 -11  -2    5.73    5.86
   3  11   2    1.14    3.30
  -3 -11  -2   19.29    6.11
   3  11   2    4.48    5.92
   3 -11   2   -1.04    4.10
  -3 -11  -2    1.45    4.56
  -3  11  -2    1.20    3.39
  -3  11  -2   -0.76    4.75
   3 -11   2    0.43    3.46
   3 -11   2   -0.47    4.83
  -3 -11  -2    4.98    5.64
   3 -11   2   -0.09    4.91
  -4 -11  -2   61.57   11.14
  -4 -11  -2   39.47    9.50
   4  11   2   57.04   11.19
   4  11   2   55.61    8.36
   4 -11   2   51.99    8.84
  -4  11  -2   50.52    8.17
  -4 -11  -2   32.12    7.70
  -4  11  -2   39.80    7.01
   4 -11   2   34.26    6.28
   4 -11   2   80.37   11.45
   4 -11   2   40.92    9.06
  -5  11  -2   -0.77    2.57
  -5 -11  -2    7.78    6.47
   5 -11   2    0.93    5.51
  -5 -11  -2    5.95    5.03
   5 -11   2    7.29    5.75
  -5 -11  -2    8.72    6.54
   5 -11   2    2.47    4.71
   5  11   2   -1.33    3.73
   5 -11   2   -2.12    4.11
  -5  11  -2    1.18    4.50
   5  11   2    6.60    6.56
  -6  11  -2   20.00    6.26
   6  11   2   31.81    8.96
  -6 -11  -2   13.56    6.00
  -6 -11  -2   17.28    7.34
  -6  11  -2   13.78    4.65
  -6 -11  -2   11.74    7.30
   6  11   2   17.36    6.43
   6 -11   2   16.85    7.87
   6 -11   2    7.92    5.32
   7  11   2    3.15    5.95
   7 -11   2   -3.70    4.65
  -7 -11  -2    5.87    6.41
  -7 -11  -2    6.19    5.70
  -7  11  -2    2.12    4.54
  -7  11  -2   -0.21    2.68
   8 -11   2    3.37    6.21
  -8  11  -2   -1.40    2.32
  -8 -11  -2    1.78    5.09
   8 -11   2    4.28    6.27
  -8 -11  -2   -1.95    6.12
   8 -11   2    5.82    5.58
  -7 -12   2    6.84    6.56
   7  12  -2    6.10    4.60
   7  12  -2   12.71    9.00
  -7  12   2    5.17    3.76
   7 -12  -2    5.65    5.98
  -7  12   2    7.93    6.29
   7 -12  -2   -0.99    6.78
   7 -12  -2    7.18    5.01
   6  12  -2    4.62    4.21
   6 -12  -2    2.40    5.91
   6  12  -2   -5.63    7.10
  -6  12   2   -4.27    5.41
  -6  12   2    3.07    3.66
  -6 -12   2    2.94    6.96
   6 -12  -2    3.86    4.63
   6 -12  -2   -0.60    5.08
   6 -12  -2    5.17    6.61
   5  12  -2   -2.24    3.30
   5 -12  -2    5.14    6.66
   5 -12  -2    1.34    4.63
   5  12  -2   -1.85    7.04
  -5  12   2   16.20    7.29
   5 -12  -2   -3.30    5.45
   5 -12  -2    3.40    4.46
  -5  12   2    2.43    3.98
  -5 -12   2   -1.13    5.82
  -5 -12   2    6.14    6.68
   4 -12  -2   14.37    7.14
  -4 -12   2    9.57    6.93
   4  12  -2    9.00    8.36
   4 -12  -2    5.87    6.23
   4  12  -2    3.49    4.45
  -4 -12   2    3.49    2.33
  -4 -12   2    1.15    5.72
   4  12  -2    6.00    4.11
  -4  12   2    0.44    3.33
  -4  12   2    6.10    6.18
   4 -12  -2    7.20    5.12
   4 -12  -2   -0.28    3.41
  -3 -12   2    4.46    3.09
   3  12  -2    1.20    3.47
   3 -12  -2    5.48    4.23
   3 -12  -2    0.71    3.68
   3 -12  -2    2.10    5.47
   3 -12  -2    9.75    6.81
   3  12  -2   -3.71    6.82
  -3  12   2   -3.34    6.09
  -3 -12   2    6.40    6.10
   3  12  -2    1.98    3.52
  -3 -12   2   10.80    7.28
  -2 -12   2   -3.78    5.30
   2 -12  -2    0.87    5.75
  -2  12   2    4.19    6.36
   2 -12  -2   -1.30    4.78
  -2 -12   2   -1.19    2.90
  -2 -12   2    0.12    4.91
   2  12  -2   -0.90    3.52
   2  12  -2   -2.10    6.48
   2 -12  -2    2.64    3.61
   2  12  -2    5.37    4.10
   2 -12  -2    4.52    3.47
   1 -12  -2    1.86    5.24
  -1  12   2   -2.05    2.95
  -1  12   2    4.00    6.38
  -1 -12   2    3.04    5.75
   1 -12  -2   -3.88    5.04
   1  12  -2    1.28    6.35
   1  12  -2    2.35    3.83
   1  12  -2   -1.46    2.84
   1 -12  -2    1.16    3.36
  -1 -12   2    0.10    3.47
   1 -12  -2   -0.25    4.63
  -1 -12   2   -0.50    5.51
   0 -12   2    0.62    5.77
   0  12   2    4.56    3.75
   0 -12  -2    4.64    6.03
   0  12  -2    4.48    6.90
   0  12  -2    1.14    3.47
   0 -12   2    4.39    4.11
   0 -12   2    1.11    3.39
   0 -12   2   37.17    8.92
   0 -12  -2    3.16    4.31
   0  12  -2    0.68    3.68
   0 -12  -2   -0.50    2.82
   0 -12  -2    8.76    6.22
   1 -12   2   -0.57    3.77
   1 -12   2    2.47    6.02
   1 -12   2    4.12    5.90
  -1  12  -2    8.28    6.93
   1 -12   2    0.40    3.62
  -1  12  -2    1.52    3.61
  -1 -12  -2   11.57    6.60
  -1 -12  -2    0.46    5.48
   1  12   2    7.85    4.38
   1  12   2   11.10    8.16
  -1 -12  -2    5.77    2.76
  -1 -12  -2   20.83    6.20
  -1  12  -2    0.92    3.12
   2  12   2    9.91    4.72
   2 -12   2    3.46    3.88
  -2  12  -2    9.42    4.31
  -2 -12  -2    4.69    6.24
   2 -12   2    1.93    4.36
  -2 -12  -2   -6.17    3.70
  -2  12  -2    8.85    6.51
   2  12   2    4.00    7.35
   2 -12   2   13.06    7.00
   2 -12   2    1.36    5.96
  -2 -12  -2    8.87    6.43
  -3 -12  -2   -2.66    5.68
  -3  12  -2   -1.89    3.66
   3 -12   2    0.37    3.78
   3 -12   2   -4.81    3.91
   3  12   2    3.07    6.79
   3  12   2   -0.80    3.18
   3 -12   2    0.94    5.82
  -3 -12  -2   -2.69    5.51
   3 -12   2   -3.56    5.22
  -3 -12  -2    7.32    5.39
  -3  12  -2   -2.81    5.63
   4  12   2   12.73    5.43
  -4 -12  -2   -1.62    6.44
   4 -12   2    3.04    4.83
   4 -12   2    9.35    6.79
  -4 -12  -2    5.16    6.04
  -4  12  -2   -0.18    5.39
  -4  12  -2    1.11    4.07
   4  12   2   -0.59    6.69
   4 -12   2    2.96    4.44
   4 -12   2    5.36    6.54
  -5  12  -2   -2.16    4.75
   5  12   2    2.84    6.73
   5 -12   2    0.64    4.68
  -5  12  -2    0.33    3.43
  -5 -12  -2   13.23    7.22
   5 -12   2    1.27    6.05
   5 -12   2   -0.97    4.48
  -5 -12  -2   -0.39    4.84
  -6  12  -2    4.89    5.51
  -6  12  -2   13.63    4.92
  -6 -12  -2    3.26    5.53
  -6 -12  -2   25.95    9.06
   6 -12   2    5.99    5.23
   6 -12   2    2.72    6.02
   4 -13  -2    5.70    6.62
  -4 -13   2    6.27    7.25
  -3 -13   2    3.51    3.00
   3  13  -2    8.63    5.16
[truncated: 1,462,589 more chars]
