# Supplementary material for: Effect of Planarity of Aromatic Rings Appended to o-Carborane on Photophysical Properties: A Series of o-Carboranyl Compounds Based on 2-Phenylpyridine- and 2-(Benzo[b]thiophen-2-yl)pyridine
Source: Molecules. 2019 Jan 7;24(1):201. doi: 10.3390/molecules24010201 (PMC6337515; doi:10.3390/molecules24010201)
Supplement: Supplementary file 1 [file molecules-24-00201-s001.zip › Supplementary files/CB2B.cif]

 
data_CB2B
 
_audit_creation_method            SHELXL-97 
_chemical_name_systematic 
; 
 ? 
; 
_chemical_name_common             ? 
_chemical_melting_point           ? 
_chemical_formula_moiety          C21H32B11N1S1 
_chemical_formula_sum 
 'C21 H32 B11 N S' 
_chemical_formula_weight          449.45 
 
loop_ 
 _atom_type_symbol 
 _atom_type_description 
 _atom_type_scat_dispersion_real 
 _atom_type_scat_dispersion_imag 
 _atom_type_scat_source 
 'C'  'C'   0.0033   0.0016 
 'International Tables Vol C Tables 4.2.6.8 and 6.1.1.4' 
 'H'  'H'   0.0000   0.0000 
 'International Tables Vol C Tables 4.2.6.8 and 6.1.1.4' 
 'B'  'B'   0.0013   0.0007 
 'International Tables Vol C Tables 4.2.6.8 and 6.1.1.4' 
 'N'  'N'   0.0061   0.0033 
 'International Tables Vol C Tables 4.2.6.8 and 6.1.1.4' 
 'S'  'S'   0.1246   0.1234 
 'International Tables Vol C Tables 4.2.6.8 and 6.1.1.4' 
 
_symmetry_cell_setting           'Monoclinic'
_symmetry_space_group_name_H-M   'P2(1)/c  ' 
 
loop_ 
 _symmetry_equiv_pos_as_xyz 
 'x, y, z' 
 '-x, y+1/2, -z+1/2' 
 '-x, -y, -z' 
 'x, -y-1/2, z-1/2' 
 
_cell_length_a                    13.576(5) 
_cell_length_b                    14.325(5) 
_cell_length_c                    13.570(4) 
_cell_angle_alpha                 90.00 
_cell_angle_beta                  101.03(2) 
_cell_angle_gamma                 90.00 
_cell_volume                      2590.3(15) 
_cell_formula_units_Z             4 
_cell_measurement_temperature     296(2) 
_cell_measurement_reflns_used     3909
_cell_measurement_theta_min       2.41
_cell_measurement_theta_max       22.55 
 
_exptl_crystal_description        'Cubic' 
_exptl_crystal_colour             'Yellow' 
_exptl_crystal_size_max           0.3 
_exptl_crystal_size_mid           0.1 
_exptl_crystal_size_min           0.05  
_exptl_crystal_density_meas       ? 
_exptl_crystal_density_diffrn     1.152 
_exptl_crystal_density_method     'not measured' 
_exptl_crystal_F_000              944 
_exptl_absorpt_coefficient_mu     0.137 
_exptl_absorpt_correction_type    'multi-scan' 
_exptl_absorpt_correction_T_min   0.930 
_exptl_absorpt_correction_T_max   0.941 
_exptl_absorpt_process_details    'SADABS' 
 
_exptl_special_details 
; 
 ? 
; 
 
_diffrn_ambient_temperature       296(2) 
_diffrn_radiation_wavelength      0.71073 
_diffrn_radiation_type            MoK\a 
_diffrn_radiation_source          'fine-focus sealed tube' 
_diffrn_radiation_monochromator   graphite 
_diffrn_measurement_device_type   'CCD area detector' 
_diffrn_measurement_method        'phi and omega scans'   
_diffrn_detector_area_resol_mean  ? 
_diffrn_reflns_number             20372 
_diffrn_reflns_av_R_equivalents   0.0477 
_diffrn_reflns_av_sigmaI/netI     0.0527 
_diffrn_reflns_limit_h_min        -16 
_diffrn_reflns_limit_h_max        14 
_diffrn_reflns_limit_k_min        -15 
_diffrn_reflns_limit_k_max        17 
_diffrn_reflns_limit_l_min        -15 
_diffrn_reflns_limit_l_max        16 
_diffrn_reflns_theta_min          1.53 
_diffrn_reflns_theta_max          25.00 
_reflns_number_total              4548 
_reflns_number_gt                 2869 
_reflns_threshold_expression      >2sigma(I) 
 
_computing_data_collection      'Bruker APEX2'
_computing_cell_refinement      'Bruker SAINT'
_computing_data_reduction       'Bruker SAINT'  
_computing_structure_solution   'SHELXS-97 (Sheldrick, 2008)'
_computing_structure_refinement 'SHELXL-97 (Sheldrick, 2008)'
_computing_molecular_graphics   'Bruker SHELXTL'
_computing_publication_material 'Bruker SHELXTL' 
 
_refine_special_details 
; 
 Refinement of F^2^ against ALL reflections.  The weighted R-factor wR and 
 goodness of fit S are based on F^2^, conventional R-factors R are based 
 on F, with F set to zero for negative F^2^. The threshold expression of 
 F^2^ > 2sigma(F^2^) is used only for calculating R-factors(gt) etc. and is 
 not relevant to the choice of reflections for refinement.  R-factors based 
 on F^2^ are statistically about twice as large as those based on F, and R- 
 factors based on ALL data will be even larger. 
; 
 
_refine_ls_structure_factor_coef  Fsqd  
_refine_ls_matrix_type            full 
_refine_ls_weighting_scheme       calc  
_refine_ls_weighting_details 
 'calc w=1/[\s^2^(Fo^2^)+(0.0916P)^2^+0.0350P] where P=(Fo^2^+2Fc^2^)/3' 
_atom_sites_solution_primary      direct 
_atom_sites_solution_secondary    difmap 
_atom_sites_solution_hydrogens    geom 
_refine_ls_hydrogen_treatment     mixed 
_refine_ls_extinction_method      none 
_refine_ls_extinction_coef        ? 
_refine_ls_number_reflns          4548 
_refine_ls_number_parameters      310 
_refine_ls_number_restraints      0 
_refine_ls_R_factor_all           0.0925 
_refine_ls_R_factor_gt            0.0500 
_refine_ls_wR_factor_ref          0.1596 
_refine_ls_wR_factor_gt           0.1317 
_refine_ls_goodness_of_fit_ref    1.029 
_refine_ls_restrained_S_all       1.029 
_refine_ls_shift/su_max           0.004 
_refine_ls_shift/su_mean          0.000 
 
loop_ 
 _atom_site_label 
 _atom_site_type_symbol 
 _atom_site_fract_x 
 _atom_site_fract_y 
 _atom_site_fract_z 
 _atom_site_U_iso_or_equiv 
 _atom_site_adp_type 
 _atom_site_occupancy 
 _atom_site_symmetry_multiplicity 
 _atom_site_calc_flag 
 _atom_site_refinement_flags 
 _atom_site_disorder_assembly 
 _atom_site_disorder_group 
S1 S 0.15706(5) 0.03233(4) 0.61755(5) 0.0490(2) Uani 1 1 d . . . 
B1 B 0.0069(2) 0.2460(2) 0.4557(2) 0.0497(8) Uani 1 1 d . . . 
N1 N 0.11208(15) 0.23474(14) 0.41243(15) 0.0462(5) Uani 1 1 d . . . 
C3 C -0.02175(18) 0.10958(17) 0.59867(18) 0.0450(6) Uani 1 1 d . . . 
C1 C 0.12192(17) 0.12226(16) 0.53313(18) 0.0410(6) Uani 1 1 d . . . 
C8 C 0.03957(19) 0.04020(17) 0.65265(19) 0.0465(6) Uani 1 1 d . . . 
C2 C 0.02762(18) 0.15864(17) 0.52976(18) 0.0446(6) Uani 1 1 d . . . 
C4 C -0.1196(2) 0.1212(2) 0.6160(2) 0.0579(7) Uani 1 1 d . . . 
H4 H -0.1617 0.1658 0.5801 0.069 Uiso 1 1 calc R . . 
C7 C 0.0055(2) -0.0143(2) 0.7249(2) 0.0602(8) Uani 1 1 d . . . 
H7 H 0.0467 -0.0590 0.7616 0.072 Uiso 1 1 calc R . . 
C5 C -0.1531(2) 0.0668(2) 0.6857(2) 0.0677(8) Uani 1 1 d . . . 
H5 H -0.2180 0.0745 0.6970 0.081 Uiso 1 1 calc R . . 
C6 C -0.0905(2) 0.0002(2) 0.7398(2) 0.0681(9) Uani 1 1 d . . . 
H6 H -0.1144 -0.0356 0.7874 0.082 Uiso 1 1 calc R . . 
C10 C 0.26705(17) 0.15035(16) 0.43863(18) 0.0412(6) Uani 1 1 d . . . 
H10 H 0.3082 0.1042 0.4728 0.049 Uiso 1 1 calc R . . 
C11 C 0.29945(18) 0.20226(16) 0.36479(17) 0.0417(6) Uani 1 1 d . . . 
C9 C 0.17344(18) 0.16706(15) 0.46166(18) 0.0407(6) Uani 1 1 d . . . 
C13 C 0.1424(2) 0.28368(19) 0.3408(2) 0.0578(8) Uani 1 1 d . . . 
H13 H 0.0998 0.3290 0.3070 0.069 Uiso 1 1 calc R . . 
C12 C 0.2345(2) 0.27008(18) 0.3145(2) 0.0569(7) Uani 1 1 d . . . 
H12 H 0.2532 0.3057 0.2639 0.068 Uiso 1 1 calc R . . 
C14 C -0.0890(2) 0.2400(2) 0.3646(2) 0.0712(9) Uani 1 1 d . . . 
H14A H -0.0916 0.1792 0.3343 0.107 Uiso 1 1 calc R . . 
H14B H -0.0831 0.2866 0.3153 0.107 Uiso 1 1 calc R . . 
H14C H -0.1493 0.2505 0.3902 0.107 Uiso 1 1 calc R . . 
C15 C 0.0145(2) 0.3429(2) 0.5164(3) 0.0769(10) Uani 1 1 d . . . 
H15A H -0.0427 0.3495 0.5478 0.115 Uiso 1 1 calc R . . 
H15B H 0.0163 0.3938 0.4708 0.115 Uiso 1 1 calc R . . 
H15C H 0.0747 0.3433 0.5669 0.115 Uiso 1 1 calc R . . 
C16 C 0.40394(18) 0.18876(16) 0.34460(18) 0.0419(6) Uani 1 1 d . . . 
C17 C 0.42323(18) 0.12740(18) 0.24324(18) 0.0461(6) Uani 1 1 d . . . 
C19 C 0.3445(2) 0.0451(2) 0.0789(2) 0.0766(9) Uani 1 1 d . . . 
H19A H 0.4001 0.0015 0.0921 0.092 Uiso 1 1 calc R . . 
H19B H 0.3632 0.0948 0.0375 0.092 Uiso 1 1 calc R . . 
C18 C 0.3307(2) 0.0860(2) 0.1759(2) 0.0741(9) Uani 1 1 d . . . 
H18A H 0.3040 0.0378 0.2136 0.089 Uiso 1 1 calc R . . 
H18B H 0.2803 0.1347 0.1616 0.089 Uiso 1 1 calc R . . 
C20 C 0.2553(2) -0.0044(3) 0.0204(3) 0.0911(11) Uani 1 1 d . . . 
H20A H 0.2377 -0.0555 0.0605 0.109 Uiso 1 1 calc R . . 
H20B H 0.1990 0.0386 0.0082 0.109 Uiso 1 1 calc R . . 
C21 C 0.2712(3) -0.0420(3) -0.0776(3) 0.1033(13) Uani 1 1 d . . . 
H21A H 0.2837 0.0087 -0.1199 0.155 Uiso 1 1 calc R . . 
H21B H 0.2124 -0.0754 -0.1096 0.155 Uiso 1 1 calc R . . 
H21C H 0.3278 -0.0834 -0.0666 0.155 Uiso 1 1 calc R . . 
B7 B 0.5350(2) 0.0685(2) 0.2724(2) 0.0521(8) Uani 1 1 d . . . 
H7A H 0.5489 0.0003 0.2405 0.062 Uiso 1 1 calc R . . 
B5 B 0.4570(2) 0.0804(2) 0.3623(2) 0.0484(8) Uani 1 1 d . . . 
H5A H 0.4188 0.0201 0.3882 0.058 Uiso 1 1 calc R . . 
B4 B 0.5014(2) 0.1729(2) 0.4431(2) 0.0561(8) Uani 1 1 d . . . 
H4A H 0.4933 0.1730 0.5222 0.067 Uiso 1 1 calc R . . 
B8 B 0.5229(2) 0.1717(2) 0.1993(2) 0.0530(8) Uani 1 1 d . . . 
H8 H 0.5289 0.1708 0.1196 0.064 Uiso 1 1 calc R . . 
B6 B 0.5871(2) 0.0987(2) 0.3984(2) 0.0592(9) Uani 1 1 d . . . 
H6A H 0.6358 0.0502 0.4485 0.071 Uiso 1 1 calc R . . 
B2 B 0.4384(2) 0.2462(2) 0.2442(2) 0.0546(8) Uani 1 1 d . . . 
H2 H 0.3887 0.2938 0.1938 0.065 Uiso 1 1 calc R . . 
B3 B 0.4901(2) 0.2765(2) 0.3705(3) 0.0594(9) Uani 1 1 d . . . 
H3 H 0.4746 0.3443 0.4025 0.071 Uiso 1 1 calc R . . 
B10 B 0.6085(3) 0.2203(3) 0.4035(3) 0.0660(10) Uani 1 1 d . . . 
H10A H 0.6711 0.2514 0.4569 0.079 Uiso 1 1 calc R . . 
B9 B 0.5680(2) 0.2657(2) 0.2804(3) 0.0627(9) Uani 1 1 d . . . 
H9 H 0.6043 0.3269 0.2538 0.075 Uiso 1 1 calc R . . 
B11 B 0.6287(2) 0.1563(2) 0.2974(3) 0.0555(8) Uani 1 1 d . . . 
H11 H 0.7045 0.1458 0.2817 0.067 Uiso 1 1 calc R . . 
 
loop_ 
 _atom_site_aniso_label 
 _atom_site_aniso_U_11 
 _atom_site_aniso_U_22 
 _atom_site_aniso_U_33 
 _atom_site_aniso_U_23 
 _atom_site_aniso_U_13 
 _atom_site_aniso_U_12 
S1 0.0498(4) 0.0500(4) 0.0489(4) 0.0067(3) 0.0133(3) 0.0009(3) 
B1 0.0419(17) 0.0474(17) 0.063(2) 0.0052(16) 0.0188(15) 0.0038(13) 
N1 0.0469(12) 0.0438(12) 0.0498(13) 0.0070(11) 0.0144(10) 0.0079(10) 
C3 0.0445(15) 0.0486(15) 0.0435(15) -0.0094(13) 0.0124(12) -0.0095(12) 
C1 0.0416(14) 0.0415(14) 0.0413(14) -0.0003(12) 0.0112(12) -0.0009(11) 
C8 0.0499(15) 0.0476(15) 0.0433(15) -0.0044(13) 0.0120(12) -0.0108(12) 
C2 0.0436(14) 0.0482(15) 0.0437(15) -0.0064(12) 0.0125(12) -0.0042(11) 
C4 0.0497(16) 0.0635(18) 0.0638(19) -0.0049(15) 0.0195(14) -0.0035(13) 
C7 0.0686(19) 0.0579(18) 0.0565(18) 0.0023(15) 0.0182(16) -0.0139(14) 
C5 0.0564(18) 0.080(2) 0.074(2) -0.0013(19) 0.0306(17) -0.0134(16) 
C6 0.072(2) 0.072(2) 0.066(2) 0.0007(17) 0.0300(18) -0.0231(17) 
C10 0.0452(14) 0.0388(13) 0.0407(14) 0.0057(12) 0.0112(12) 0.0056(11) 
C11 0.0458(14) 0.0424(14) 0.0393(14) 0.0033(12) 0.0138(12) 0.0053(12) 
C9 0.0429(14) 0.0374(13) 0.0422(14) 0.0001(12) 0.0087(12) 0.0020(11) 
C13 0.0592(17) 0.0548(16) 0.0632(19) 0.0233(15) 0.0210(15) 0.0188(13) 
C12 0.0596(17) 0.0556(17) 0.0600(18) 0.0213(15) 0.0228(14) 0.0160(14) 
C14 0.0550(18) 0.072(2) 0.083(2) 0.0174(18) 0.0059(16) 0.0071(15) 
C15 0.071(2) 0.0637(19) 0.104(3) -0.0142(19) 0.0357(19) -0.0009(16) 
C16 0.0461(14) 0.0422(14) 0.0403(14) 0.0043(12) 0.0153(12) 0.0011(11) 
C17 0.0423(14) 0.0565(16) 0.0422(15) -0.0034(13) 0.0151(12) -0.0021(12) 
C19 0.0589(19) 0.105(3) 0.067(2) -0.0229(19) 0.0143(16) -0.0063(17) 
C18 0.0511(18) 0.110(3) 0.063(2) -0.0243(19) 0.0167(15) -0.0137(17) 
C20 0.061(2) 0.135(3) 0.077(2) -0.040(2) 0.0106(18) -0.006(2) 
C21 0.098(3) 0.132(3) 0.078(3) -0.031(2) 0.012(2) 0.004(2) 
B7 0.0476(17) 0.0517(18) 0.062(2) 0.0027(17) 0.0227(16) 0.0061(14) 
B5 0.0523(18) 0.0434(17) 0.0537(19) 0.0100(15) 0.0213(15) 0.0080(13) 
B4 0.0517(19) 0.073(2) 0.0436(18) -0.0008(17) 0.0090(15) 0.0057(16) 
B8 0.0509(18) 0.064(2) 0.0493(19) 0.0069(16) 0.0218(15) -0.0017(15) 
B6 0.0499(19) 0.073(2) 0.055(2) 0.0136(18) 0.0111(16) 0.0142(16) 
B2 0.058(2) 0.0529(19) 0.059(2) 0.0157(16) 0.0263(17) 0.0063(15) 
B3 0.056(2) 0.0489(19) 0.076(2) -0.0053(18) 0.0203(18) -0.0073(15) 
B10 0.050(2) 0.080(2) 0.070(2) -0.014(2) 0.0145(17) -0.0090(17) 
B9 0.059(2) 0.053(2) 0.083(2) 0.0037(19) 0.0312(19) -0.0082(15) 
B11 0.0433(17) 0.063(2) 0.061(2) 0.0017(17) 0.0136(16) -0.0009(15) 
 
_geom_special_details 
; 
 All esds (except the esd in the dihedral angle between two l.s. planes) 
 are estimated using the full covariance matrix.  The cell esds are taken 
 into account individually in the estimation of esds in distances, angles 
 and torsion angles; correlations between esds in cell parameters are only 
 used when they are defined by crystal symmetry.  An approximate (isotropic) 
 treatment of cell esds is used for estimating esds involving l.s. planes. 
; 
 
loop_ 
 _geom_bond_atom_site_label_1 
 _geom_bond_atom_site_label_2 
 _geom_bond_distance 
 _geom_bond_site_symmetry_2 
 _geom_bond_publ_flag 
S1 C1 1.729(2) . ? 
S1 C8 1.753(3) . ? 
B1 C2 1.595(4) . ? 
B1 C15 1.608(4) . ? 
B1 C14 1.617(4) . ? 
B1 N1 1.653(3) . ? 
N1 C13 1.326(3) . ? 
N1 C9 1.366(3) . ? 
C3 C4 1.403(3) . ? 
C3 C8 1.409(3) . ? 
C3 C2 1.434(3) . ? 
C1 C2 1.375(3) . ? 
C1 C9 1.450(3) . ? 
C8 C7 1.399(4) . ? 
C4 C5 1.369(4) . ? 
C7 C6 1.373(4) . ? 
C5 C6 1.390(4) . ? 
C10 C11 1.385(3) . ? 
C10 C9 1.386(3) . ? 
C11 C12 1.399(3) . ? 
C11 C16 1.508(3) . ? 
C13 C12 1.378(3) . ? 
C16 C17 1.694(3) . ? 
C16 B3 1.707(4) . ? 
C16 B4 1.707(4) . ? 
C16 B5 1.708(4) . ? 
C16 B2 1.732(4) . ? 
C17 C18 1.525(4) . ? 
C17 B8 1.702(4) . ? 
C17 B2 1.714(4) . ? 
C17 B7 1.715(4) . ? 
C17 B5 1.728(4) . ? 
C19 C18 1.486(4) . ? 
C19 C20 1.494(4) . ? 
C20 C21 1.489(4) . ? 
B7 B5 1.770(4) . ? 
B7 B8 1.770(4) . ? 
B7 B6 1.774(5) . ? 
B7 B11 1.774(4) . ? 
B5 B4 1.752(4) . ? 
B5 B6 1.761(4) . ? 
B4 B6 1.767(4) . ? 
B4 B3 1.771(5) . ? 
B4 B10 1.778(4) . ? 
B8 B2 1.759(4) . ? 
B8 B9 1.772(5) . ? 
B8 B11 1.776(5) . ? 
B6 B10 1.766(5) . ? 
B6 B11 1.781(5) . ? 
B2 B9 1.757(4) . ? 
B2 B3 1.778(5) . ? 
B3 B9 1.770(5) . ? 
B3 B10 1.777(5) . ? 
B10 B11 1.772(5) . ? 
B10 B9 1.778(5) . ? 
B9 B11 1.766(5) . ? 
 
loop_ 
 _geom_angle_atom_site_label_1 
 _geom_angle_atom_site_label_2 
 _geom_angle_atom_site_label_3 
 _geom_angle 
 _geom_angle_site_symmetry_1 
 _geom_angle_site_symmetry_3 
 _geom_angle_publ_flag 
C1 S1 C8 88.97(12) . . ? 
C2 B1 C15 111.6(2) . . ? 
C2 B1 C14 117.3(2) . . ? 
C15 B1 C14 113.7(2) . . ? 
C2 B1 N1 95.00(18) . . ? 
C15 B1 N1 106.9(2) . . ? 
C14 B1 N1 110.3(2) . . ? 
C13 N1 C9 119.2(2) . . ? 
C13 N1 B1 128.3(2) . . ? 
C9 N1 B1 112.50(19) . . ? 
C4 C3 C8 118.8(2) . . ? 
C4 C3 C2 128.8(3) . . ? 
C8 C3 C2 112.4(2) . . ? 
C2 C1 C9 112.0(2) . . ? 
C2 C1 S1 116.20(18) . . ? 
C9 C1 S1 131.74(18) . . ? 
C7 C8 C3 121.1(2) . . ? 
C7 C8 S1 126.5(2) . . ? 
C3 C8 S1 112.45(18) . . ? 
C1 C2 C3 109.9(2) . . ? 
C1 C2 B1 111.7(2) . . ? 
C3 C2 B1 138.3(2) . . ? 
C5 C4 C3 119.9(3) . . ? 
C6 C7 C8 118.0(3) . . ? 
C4 C5 C6 120.4(3) . . ? 
C7 C6 C5 121.8(3) . . ? 
C11 C10 C9 120.1(2) . . ? 
C10 C11 C12 117.9(2) . . ? 
C10 C11 C16 120.2(2) . . ? 
C12 C11 C16 121.9(2) . . ? 
N1 C9 C10 120.8(2) . . ? 
N1 C9 C1 108.3(2) . . ? 
C10 C9 C1 130.9(2) . . ? 
N1 C13 C12 122.6(2) . . ? 
C13 C12 C11 119.4(2) . . ? 
C11 C16 C17 120.7(2) . . ? 
C11 C16 B3 120.0(2) . . ? 
C17 C16 B3 110.06(19) . . ? 
C11 C16 B4 119.4(2) . . ? 
C17 C16 B4 110.46(18) . . ? 
B3 C16 B4 62.52(18) . . ? 
C11 C16 B5 118.49(19) . . ? 
C17 C16 B5 61.06(15) . . ? 
B3 C16 B5 112.7(2) . . ? 
B4 C16 B5 61.73(17) . . ? 
C11 C16 B2 119.2(2) . . ? 
C17 C16 B2 60.04(16) . . ? 
B3 C16 B2 62.26(18) . . ? 
B4 C16 B2 113.2(2) . . ? 
B5 C16 B2 111.85(19) . . ? 
C18 C17 C16 116.8(2) . . ? 
C18 C17 B8 123.7(2) . . ? 
C16 C17 B8 110.33(19) . . ? 
C18 C17 B2 118.3(2) . . ? 
C16 C17 B2 61.06(15) . . ? 
B8 C17 B2 61.95(16) . . ? 
C18 C17 B7 122.6(2) . . ? 
C16 C17 B7 109.58(19) . . ? 
B8 C17 B7 62.40(17) . . ? 
B2 C17 B7 112.8(2) . . ? 
C18 C17 B5 116.7(2) . . ? 
C16 C17 B5 59.86(15) . . ? 
B8 C17 B5 112.7(2) . . ? 
B2 C17 B5 111.7(2) . . ? 
B7 C17 B5 61.86(16) . . ? 
C18 C19 C20 115.5(3) . . ? 
C19 C18 C17 117.0(2) . . ? 
C21 C20 C19 113.9(3) . . ? 
C17 B7 B5 59.45(15) . . ? 
C17 B7 B8 58.46(16) . . ? 
B5 B7 B8 107.6(2) . . ? 
C17 B7 B6 106.0(2) . . ? 
B5 B7 B6 59.59(17) . . ? 
B8 B7 B6 108.3(2) . . ? 
C17 B7 B11 105.5(2) . . ? 
B5 B7 B11 107.6(2) . . ? 
B8 B7 B11 60.13(18) . . ? 
B6 B7 B11 60.27(19) . . ? 
C16 B5 C17 59.08(15) . . ? 
C16 B5 B4 59.10(16) . . ? 
C17 B5 B4 106.8(2) . . ? 
C16 B5 B6 106.1(2) . . ? 
C17 B5 B6 105.9(2) . . ? 
B4 B5 B6 60.42(18) . . ? 
C16 B5 B7 106.4(2) . . ? 
C17 B5 B7 58.69(16) . . ? 
B4 B5 B7 108.9(2) . . ? 
B6 B5 B7 60.32(17) . . ? 
C16 B4 B5 59.17(16) . . ? 
C16 B4 B6 105.9(2) . . ? 
B5 B4 B6 60.04(17) . . ? 
C16 B4 B3 58.74(17) . . ? 
B5 B4 B3 107.6(2) . . ? 
B6 B4 B3 107.8(2) . . ? 
C16 B4 B10 105.6(2) . . ? 
B5 B4 B10 107.7(2) . . ? 
B6 B4 B10 59.74(19) . . ? 
B3 B4 B10 60.07(19) . . ? 
C17 B8 B2 59.36(16) . . ? 
C17 B8 B7 59.14(16) . . ? 
B2 B8 B7 108.0(2) . . ? 
C17 B8 B9 105.6(2) . . ? 
B2 B8 B9 59.68(18) . . ? 
B7 B8 B9 107.6(2) . . ? 
C17 B8 B11 105.9(2) . . ? 
B2 B8 B11 107.7(2) . . ? 
B7 B8 B11 60.05(17) . . ? 
B9 B8 B11 59.68(18) . . ? 
B5 B6 B10 107.8(2) . . ? 
B5 B6 B4 59.54(17) . . ? 
B10 B6 B4 60.44(18) . . ? 
B5 B6 B7 60.10(17) . . ? 
B10 B6 B7 108.1(2) . . ? 
B4 B6 B7 108.0(2) . . ? 
B5 B6 B11 107.7(2) . . ? 
B10 B6 B11 59.95(19) . . ? 
B4 B6 B11 108.2(2) . . ? 
B7 B6 B11 59.88(18) . . ? 
C17 B2 C16 58.90(15) . . ? 
C17 B2 B9 105.8(2) . . ? 
C16 B2 B9 105.2(2) . . ? 
C17 B2 B8 58.69(16) . . ? 
C16 B2 B8 106.0(2) . . ? 
B9 B2 B8 60.55(18) . . ? 
C17 B2 B3 105.9(2) . . ? 
C16 B2 B3 58.18(16) . . ? 
B9 B2 B3 60.11(19) . . ? 
B8 B2 B3 108.6(2) . . ? 
C16 B3 B4 58.74(16) . . ? 
C16 B3 B9 105.7(2) . . ? 
B4 B3 B9 108.1(2) . . ? 
C16 B3 B10 105.7(2) . . ? 
B4 B3 B10 60.17(19) . . ? 
B9 B3 B10 60.18(19) . . ? 
C16 B3 B2 59.56(16) . . ? 
B4 B3 B2 108.0(2) . . ? 
B9 B3 B2 59.36(18) . . ? 
B10 B3 B2 107.7(2) . . ? 
B6 B10 B11 60.45(18) . . ? 
B6 B10 B3 107.6(2) . . ? 
B11 B10 B3 107.7(2) . . ? 
B6 B10 B9 107.8(2) . . ? 
B11 B10 B9 59.64(19) . . ? 
B3 B10 B9 59.74(19) . . ? 
B6 B10 B4 59.82(18) . . ? 
B11 B10 B4 108.1(2) . . ? 
B3 B10 B4 59.77(18) . . ? 
B9 B10 B4 107.5(2) . . ? 
B2 B9 B11 108.2(2) . . ? 
B2 B9 B3 60.53(18) . . ? 
B11 B9 B3 108.2(2) . . ? 
B2 B9 B8 59.77(18) . . ? 
B11 B9 B8 60.26(19) . . ? 
B3 B9 B8 108.3(2) . . ? 
B2 B9 B10 108.5(2) . . ? 
B11 B9 B10 60.02(19) . . ? 
B3 B9 B10 60.08(19) . . ? 
B8 B9 B10 108.3(2) . . ? 
B9 B11 B10 60.3(2) . . ? 
B9 B11 B7 107.7(2) . . ? 
B10 B11 B7 107.8(2) . . ? 
B9 B11 B8 60.06(19) . . ? 
B10 B11 B8 108.4(2) . . ? 
B7 B11 B8 59.82(17) . . ? 
B9 B11 B6 107.6(2) . . ? 
B10 B11 B6 59.59(19) . . ? 
B7 B11 B6 59.85(18) . . ? 
B8 B11 B6 107.7(2) . . ? 
 
_diffrn_measured_fraction_theta_max    0.995 
_diffrn_reflns_theta_full              25.00 
_diffrn_measured_fraction_theta_full   0.995 
_refine_diff_density_max    0.208 
_refine_diff_density_min   -0.217 
_refine_diff_density_rms    0.045 
